# Supplementary material for: Plasma Proteomic Profiling Reveals Distinct Roles of Apolipoprotein B-containing Lipoproteins in Atherosclerosis
Source: Research Square preprint supplement (doi:10.21203/rs.3.rs-8307321/v1), 2025-12-19
Supplement: Supplementary file 1 [file 9e1a892c59bd291c7c1d05c3.xlsx]

## Sheet: Overview
Table of contents
Supplementary Table 1. Baseline characterstics of UK Biobank participants.
Supplementary Table 2. Baseline characterstics of Multi-Ethnic Study of Atherosclerosis participants.
Supplementary Table 3. Observational associations of plasma proteins with low-density lipoprotein, triglyceride-rich lipoproteins, and lipoprotein(a) concentrations in UK Biobank.
Supplementary Table 4. Sensitivity analyses refitting models for lipoprotein-protein associations in UK Biobank using other available methods to measure lipoprotein concentration.
Supplementary Table 5. Mendelian randomization analysis for associations between proteins selected in UK Biobank analysis with low-density lipoprotein, triglyceride-rich lipoproteins, and lipoprotein(a) concentrations.
Supplementary Table 6. External validation of associations of plasma proteins with low-density lipoprotein, triglyceride-rich lipoproteins, and lipoprotein(a) concentrations in Multi-Ethnic Study of Atherosclerosis.
Supplementary Table 7. Enirchment analysis of proteins selected for low-density lipoprotein, triglyceride-rich lipoproteins, and lipoprotein(a).
Supplementary Table 8. Associations of proteins selected for low-density lipoprotein, triglyceride-rich lipoproteins, and lipoprotein(a) with incident coronary artery disease in UK Biobank.
Supplementary Table 9. External validation of associations of proteins selected for low-density lipoprotein, triglyceride-rich lipoproteins, and lipoprotein(a) with incident coronary artery disease in Multi-Ethnic Study of Atherosclerosis.
Supplementary Table 10. Formulas for low-density lipoprotein, triglyceride-rich lipoproteins, and lipoprotein(a) multi-protein scores.
Supplementary Table 11. Associations of multi-protein scores with incident coronary artery disease in UK Biobank.
Supplementary Table 12. Associations of conventionally measured lipoprotein classes with incident coronary artery disease in UK Biobank.
Supplementary Table 13. Associations of cluster multi-protein scores with incident coronary artery disease in UK Biobank.
Supplementary Table 14. Protein clusters prioritized by high-dimensional mediation analysis as mediators of the association between triglyceride-rich lipoproteins and lipoprotein(a) with incident coronary artery disease.

## Sheet: S1
Supplementary Table 1. Baseline characterstics of UK Biobank participants.
Characteristic	N = 35,269
Age, years	58 (50, 63)*
Female sex	19,441 (55%)
Body mass index, kg/m2	26.7 (24.1, 29.8)
Race/ethncity**
White	32,807 (93%)
Black	840 (2.4%)
Asian	793 (2.3%)
Mixed/Other	679 (1.9%)
Current smokers**	3,723 (11%)
Glycated hemoglobin, %	5.4 (5.2, 5.6)
Systolic blood pressure, mmHg	137 (125, 150)
Use of statins	4,887 (14%)
Use of any lipid-lowering medication	6,120 (17%)
Apolipoprotein B, g/L	1.02 (0.87, 1.18)
LDL cholesterol, mmol/L	3.5 (3.0, 4.1)
Remnant cholesterol, mmol/L	0.65 (0.49, 0.84)
Triglycerides, mmol/L	1.47 (1.04, 2.13)
Lipoprotein(a), nmol/L	20 (8, 75)
HDL cholesterol, mmol/L	1.4 (1.2, 1.7)
*Values are number (proportion) for categorical variables and median (interquartile range) for continuous variables.
**Race/ethnicity includes not reported values as "Mixed/Others", while smoking status includes missing values.
Abbreviations: LDL, low-density lipoprotein; HDL, high-density lipoprotein.

## Sheet: S2
Supplementary Table 2. Baseline characterstics of Multi-Ethnic Study of Atherosclerosis participants.
Characteristic	N = 5915
Age, years	62 (10)
Female sex	3112 (53%)
Body mass index, kg/m²	28.3 (5.5)
Race/ethnicity
White	2324 (39%)
Black	1526 (26%)
Chinese	718 (12%)
Hispanic	1347 (23%)
Current smokers	765 (13%)
Fasting glucose, mg/dL	97 (30)
Systolic blood pressure, mmHg	126 (22)
Statin use	886 (15%)
Any lipid-lowering medication use	969 (16%)
LDL cholesterol, mmol/L	3.00 (2.48, 3.52)
Remnant cholesterol, mmol/L	0.57 (0.41, 0.83)
Triglycerides, mmol/L	1.25 (0.88, 1.81)
HDL cholesterol, mmol/L	1.24 (1.06, 1.53)
*Values are number (proportion) for categorical variables and mean (standard deviation) or median (interquartile range) for continuous variables.
Abbreviations: LDL, low-density lipoprotein; HDL, high-density lipoprotein.

## Sheet: S3
Supplementary Table 3. Observational associations of plasma proteins with low-density lipoprotein, triglyceride-rich lipoproteins, and lipoprotein(a) concentrations in UK Biobank.
Estimates are beta coefficients reflecting the change in protein concentration (standard deviation units) per one standard deviation increase in LDL, TRL, or Lp(a) concentration. For each protein, we fit a general linear model with the protein as the outcome and LDL, TRL, and Lp(a) as predictors, adjusting for age, sex, body mass index, race/ethnicity, smoking status, glycated hemoglobin concentr…
Protein - long name	Protein - short name	UniProt ID	Estimate LDL	SE LDL	P LDL	Padj LDL	Estimate TRL	SE TRL	P TRL	Padj TRL	Estimate Lp(a)	SE Lp(a)	P Lp(a)	Padj Lp(a)
A1BG;Alpha-1B-glycoprotein	A1BG	P04217	0.0456205	0.00675938	1.50943e-11	2.13886e-08	0.100511	0.00655009	5.67818e-53	8.04598e-50	0.0216504	0.00501556	1.58847e-05	0.0225086
AAMDC;Mth938 domain-containing protein	AAMDC	Q9H7C9	0.0358629	0.00717831	5.88104e-07	0.000833343	0.151502	0.00695605	1.76235e-104	2.49725e-101	0.00314644	0.00532641	0.554709	1
AARSD1;Alanyl-tRNA editing protein Aarsd1	AARSD1	Q9BTE6	-0.0192904	0.00718335	0.00724712	1	0.0926837	0.00696094	2.3761e-40	3.36693e-37	0.00313331	0.00533015	0.55664	1
ABCA2;ATP-binding cassette sub-family A member 2	ABCA2	Q9BZC7	-0.0263252	0.00719835	0.000255437	0.361955	0.104829	0.00697546	6.90198e-51	9.7801e-48	-0.00302164	0.00534128	0.571591	1
ABHD14B;Protein ABHD14B	ABHD14B	Q96IU4	0.0318443	0.0072415	1.09834e-05	0.0155635	0.0870746	0.00701728	2.78157e-35	3.94148e-32	-0.00757086	0.0053733	0.15885	1
ABL1;Tyrosine-protein kinase ABL1	ABL1	P00519	-0.00494262	0.00714517	0.489104	1	0.186263	0.00692393	8.36292e-158	1.18503e-154	0.010225	0.00530182	0.0537898	1
ABO;Histo-blood group ABO system transferase	ABO	P16442	0.0579828	0.00732046	2.43157e-15	3.44554e-12	-0.0259617	0.0070938	0.000252807	0.358227	-0.0172471	0.00543189	0.00149888	1
ABRAXAS2;BRISC complex subunit Abraxas 2	ABRAXAS2	Q15018	-0.00708666	0.00723405	0.327277	1	0.126408	0.00701006	2.2996e-72	3.25854e-69	0.00775295	0.00536777	0.148649	1
ACAA1;3-ketoacyl-CoA thiolase, peroxisomal	ACAA1	P09110	-0.0074058	0.00703749	0.292653	1	0.163447	0.00681959	6.23574e-126	8.83604e-123	-0.0106146	0.00522192	0.042091	1
ACADM;Medium-chain specific acyl-CoA dehydrogenase, mitochondrial	ACADM	P11310	-0.00407525	0.00732566	0.578011	1	0.0186973	0.00709884	0.0084458	1	-0.000942052	0.00543575	0.862411	1
ACADSB;Short/branched chain specific acyl-CoA dehydrogenase, mitochondrial	ACADSB	P45954	0.0286877	0.00724717	7.5581e-05	0.107098	0.117687	0.00702278	8.69263e-63	1.23175e-59	0.00726704	0.00537751	0.176583	1
ACAN;Aggrecan core protein	ACAN	P16112	0.12909	0.00661495	2.29073e-84	3.24597e-81	-0.0153651	0.00641013	0.0165351	1	0.016705	0.00490839	0.000666371	0.944247
ACE;Angiotensin-converting enzyme	ACE	P12821	-0.020509	0.00728209	0.00485991	1	0.00584145	0.00705662	0.407791	1	0.00442751	0.00540342	0.41257	1
ACE2;Angiotensin-converting enzyme 2	ACE2	Q9BYF1	-0.0322278	0.00636154	4.08218e-07	0.000578444	0.157396	0.00616457	1.70888e-142	2.42148e-139	-0.0211856	0.00472036	7.20787e-06	0.0102136
ACHE;Acetylcholinesterase	ACHE	P22303	-0.0299554	0.00694994	1.63567e-05	0.0231775	0.0518066	0.00673475	1.48103e-14	2.09861e-11	-0.0186853	0.00515696	0.000291264	0.412721
ACOT13;Acyl-coenzyme A thioesterase 13	ACOT13	Q9NPJ3	-0.00305066	0.00728949	0.675584	1	0.0736161	0.00706379	2.15102e-25	3.048e-22	0.00858145	0.00540891	0.112626	1
ACOX1;Peroxisomal acyl-coenzyme A oxidase 1	ACOX1	Q15067	0.00862505	0.00728604	0.236509	1	0.0773871	0.00706044	6.55321e-28	9.28589e-25	0.00283394	0.00540635	0.600152	1
ACP1;Low molecular weight phosphotyrosine protein phosphatase	ACP1	P24666	0.0153948	0.00726682	0.0341397	1	0.0524443	0.00704181	9.72615e-14	1.3782e-10	-0.0123611	0.00539208	0.0218849	1
ACP5;Tartrate-resistant acid phosphatase type 5	ACP5	P13686	0.0754913	0.00684719	3.21462e-28	4.55512e-25	0.1072	0.00663519	1.66417e-58	2.35812e-55	0.00101101	0.00508072	0.842272	1
ACP6;Lysophosphatidic acid phosphatase type 6	ACP6	Q9NPH0	0.025008	0.00726982	0.000582447	0.825327	0.0493073	0.00704473	2.62072e-12	3.71356e-09	-0.000608638	0.00539432	0.910166	1
ACRBP;Acrosin-binding protein	ACRBP	Q8NEB7	0.00568833	0.00726585	0.4337	1	0.084846	0.00704088	2.2429e-33	3.17819e-30	-0.00384692	0.00539137	0.475521	1
ACRV1;Acrosomal protein SP-10	ACRV1	P26436	-0.0109486	0.0048695	0.0245561	1	-0.00344215	0.00471872	0.465721	1	-0.00813794	0.00361324	0.0243122	1
ACSL1;Long-chain-fatty-acid--CoA ligase 1	ACSL1	P33121	0.0106623	0.00731976	0.145225	1	-0.0217395	0.00709312	0.00217934	1	0.00708327	0.00543137	0.192194	1
ACTA2;Actin, aortic smooth muscle	ACTA2	P62736	-0.0224287	0.00663991	0.000731291	1	0.00566892	0.00643432	0.3783	1	0.0076371	0.00492691	0.121132	1
ACTN2;Alpha-actinin-2	ACTN2	P35609	-0.038461	0.00712668	6.82932e-08	9.67715e-05	-0.00633355	0.00690602	0.359093	1	0.00839662	0.0052881	0.112333	1
ACTN4;Alpha-actinin-4	ACTN4	O43707	-0.00404083	0.00731428	0.580639	1	0.0120394	0.00708781	0.0894014	1	0.00387946	0.00542731	0.474735	1
ACVRL1;Serine/threonine-protein kinase receptor R3	ACVRL1	P37023	0.0136031	0.00654691	0.0377355	1	0.0582502	0.0063442	4.46997e-20	6.33394e-17	0.00437826	0.00485791	0.367453	1
ACY1;Aminoacylase-1	ACY1	Q03154	-0.0164662	0.0062575	0.00850643	1	0.189498	0.00606375	1.6878e-211	2.39161e-208	-0.0325065	0.00464316	2.58795e-12	3.66713e-09
ACY3;N-acyl-aromatic-L-amino acid amidohydrolase	ACY3	Q96HD9	-0.0574934	0.00709423	5.47702e-16	7.76093e-13	0.0817494	0.00687457	1.51123e-32	2.14141e-29	0.000225394	0.00526402	0.965847	1
ACYP1;Acylphosphatase-1	ACYP1	P07311	0.00450185	0.00720128	0.53188	1	0.127681	0.00697831	1.94122e-74	2.75071e-71	-0.00191851	0.00534346	0.719568	1
ADA;Adenosine deaminase	ADA	P00813	-0.00100303	0.00719004	0.889054	1	0.0960703	0.00696742	3.86858e-43	5.48178e-40	0.00751603	0.00533512	0.158908	1
ADA2;Adenosine deaminase 2	ADA2	Q9NZK5	-0.0769824	0.00700155	4.48421e-28	6.35413e-25	0.0268471	0.00678476	7.60534e-05	0.107768	-0.00641208	0.00519525	0.217129	1
ADAM12;Disintegrin and metalloproteinase domain-containing protein 12	ADAM12	O43184	-0.0486422	0.00692212	2.14753e-12	3.04305e-09	0.0479272	0.00670779	9.17303e-13	1.29982e-09	-0.0016914	0.00513631	0.74193	1
ADAM15;Disintegrin and metalloproteinase domain-containing protein 15	ADAM15	Q13444	-0.0659786	0.00722744	7.27726e-20	1.03119e-16	-0.00600037	0.00700366	0.39159	1	-0.00489546	0.00536287	0.361331	1
ADAM22;Disintegrin and metalloproteinase domain-containing protein 22	ADAM22	Q9P0K1	-0.00952028	0.00709247	0.179505	1	0.0569223	0.00687287	1.25161e-16	1.77353e-13	-0.0046696	0.00526272	0.374925	1
ADAM23;Disintegrin and metalloproteinase domain-containing protein 23	ADAM23	O75077	0.00568903	0.00726178	0.433385	1	0.0363918	0.00703693	2.33433e-07	0.000330775	-0.0121002	0.00538835	0.0247346	1
ADAM8;Disintegrin and metalloproteinase domain-containing protein 8	ADAM8	P78325	-0.0771108	0.00711769	2.63203e-27	3.72958e-24	0.0930423	0.00689731	2.27953e-41	3.2301e-38	0.0177736	0.00528143	0.000765432	1
ADAM9;Disintegrin and metalloproteinase domain-containing protein 9	ADAM9	Q13443	-0.0875495	0.00709088	5.98924e-35	8.48675e-32	0.0327614	0.00687133	1.86959e-06	0.00264921	-0.00795792	0.00526154	0.130424	1
ADAMTS1;A disintegrin and metalloproteinase with thrombospondin motifs 1	ADAMTS1	Q9UHI8	-0.00471865	0.00722984	0.513978	1	0.043823	0.00700598	4.01861e-10	5.69437e-07	-0.00911204	0.00536465	0.0894158	1
ADAMTS13;A disintegrin and metalloproteinase with thrombospondin motifs 13	ADAMTS13	Q76LX8	0.0242073	0.0071835	0.000752914	1	0.0465928	0.00696108	2.21412e-11	3.13741e-08	0.00565351	0.00533027	0.288859	1
ADAMTS15;A disintegrin and metalloproteinase with thrombospondin motifs 15	ADAMTS15	Q8TE58	0.00266429	0.00655058	0.684212	1	0.16849	0.00634776	1.00353e-153	1.422e-150	0.0203204	0.00486063	2.9142e-05	0.0412942
ADAMTS16;A disintegrin and metalloproteinase with thrombospondin motifs 16	ADAMTS16	Q8TE57	0.0263903	0.00685405	0.000118169	0.167446	0.0151259	0.00664183	0.0227704	1	-0.0117276	0.00508581	0.0211197	1
ADAMTS4;A disintegrin and metalloproteinase with thrombospondin motifs 4	ADAMTS4	O75173	-0.0147626	0.0070928	0.0374086	1	0.0908689	0.00687319	8.28249e-40	1.17363e-36	-0.0018562	0.00526296	0.724322	1
ADAMTS8;A disintegrin and metalloproteinase with thrombospondin motifs 8	ADAMTS8	Q9UP79	0.040825	0.00720577	1.47658e-08	2.09232e-05	-0.000818529	0.00698266	0.906684	1	-0.00678181	0.00534679	0.204667	1
ADAMTSL2;ADAMTS-like protein 2	ADAMTSL2	Q86TH1	-0.0945023	0.00656739	8.16289e-47	1.15668e-43	0.123498	0.00636405	1.88673e-83	2.6735e-80	-0.0171473	0.0048731	0.000434111	0.615135
ADAMTSL4;ADAMTS-like protein 4	ADAMTSL4	Q6UY14	-0.0050046	0.00708652	0.48006	1	0.0656265	0.0068671	1.29187e-21	1.83057e-18	-0.00531457	0.0052583	0.312166	1
ADAMTSL5;ADAMTS-like protein 5	ADAMTSL5	Q6ZMM2	-0.0431916	0.00725016	2.58814e-09	3.6674e-06	-0.00205714	0.00702567	0.769674	1	0.00376987	0.00537973	0.483461	1
ADCYAP1R1;Pituitary adenylate cyclase-activating polypeptide type I receptor	ADCYAP1R1	P41586	0.0111495	0.00732656	0.12807	1	0.00389288	0.0070997	0.583479	1	-0.00551793	0.00543641	0.310115	1
ADD1;Alpha-adducin	ADD1	P35611	-0.0203348	0.00720817	0.00478887	1	0.136811	0.00698498	5.71638e-85	8.10011e-82	0.01085	0.00534857	0.0425084	1
ADGRB3;Adhesion G protein-coupled receptor B3	ADGRB3	O60242	0.0113433	0.00717852	0.114075	1	-0.0162134	0.00695625	0.019771	1	-0.00721215	0.00532657	0.175746	1
ADGRD1;Adhesion G-protein coupled receptor D1	ADGRD1	Q6QNK2	0.0160721	0.00640832	0.0121459	1	0.119108	0.0062099	1.40721e-81	1.99402e-78	0.000353152	0.00475507	0.940797	1
ADGRE1;Adhesion G protein-coupled receptor E1	ADGRE1	Q14246	-0.0762466	0.00711316	9.10787e-27	1.29059e-23	0.0622312	0.00689292	1.8299e-19	2.59296e-16	0.0122838	0.00527807	0.0199537	1
ADGRE2;Adhesion G protein-coupled receptor E2	ADGRE2	Q9UHX3	-0.0372458	0.00692053	7.41628e-08	0.000105089	0.00455091	0.00670625	0.497391	1	0.000515504	0.00513513	0.920037	1
ADGRE5;Adhesion G protein-coupled receptor E5	ADGRE5	P48960	-0.0373161	0.00690428	6.53093e-08	9.25433e-05	-0.00506838	0.00669051	0.448727	1	-0.0108956	0.00512308	0.0334468	1
ADGRF5;Adhesion G protein-coupled receptor F5	ADGRF5	Q8IZF2	0.00557181	0.00707359	0.430882	1	0.11445	0.00685458	2.39764e-62	3.39746e-59	0.00514964	0.00524871	0.326538	1
ADGRG1;Adhesion G-protein coupled receptor G1	ADGRG1	Q9Y653	-0.161393	0.00652538	6.54168e-134	9.26956e-131	0.0466326	0.00632333	1.68344e-13	2.38543e-10	-0.0307786	0.00484193	2.0866e-10	2.95671e-07
ADGRG2;Adhesion G-protein coupled receptor G2	ADGRG2	Q8IZP9	0.142072	0.0064971	2.68859e-105	3.80973e-102	-0.049706	0.00629593	2.98823e-15	4.23433e-12	-0.00655712	0.00482094	0.173797	1
ADGRV1;Adhesion G-protein coupled receptor V1	ADGRV1	Q8WXG9	-0.00301055	0.00732812	0.681205	1	-0.00260309	0.00710122	0.713943	1	-0.0014229	0.00543757	0.793571	1
ADH1B;All-trans-retinol dehydrogenase	ADH1B	P00325	0.0280528	0.00665218	2.48104e-05	0.0351563	0.157784	0.00644621	3.24936e-131	4.60434e-128	-0.033313	0.00493602	1.51212e-11	2.14267e-08
ADH4;All-trans-retinol dehydrogenase [NAD(+)] ADH4	ADH4	P08319	-0.0130621	0.00633621	0.0392628	1	0.220899	0.00614003	2.13336e-278	3.02298e-275	-0.0196651	0.00470156	2.88803e-05	0.0409234
ADIPOQ;Adiponectin	ADIPOQ	Q15848	0.0797552	0.00583223	1.84065e-42	2.60821e-39	-0.21909	0.00565165	5.73e-322	8.12106e-319	0.0242534	0.0043276	2.10582e-08	2.98395e-05
ADM;Pro-adrenomedullin	ADM	P35318	-0.0428398	0.00593498	5.37463e-13	7.61586e-10	0.0930774	0.00575122	1.06616e-58	1.51075e-55	0.00492536	0.00440384	0.263394	1
ADRA2A;Alpha-2A adrenergic receptor	ADRA2A	P08913	-0.00821949	0.00731573	0.261217	1	-0.0124082	0.00708922	0.0800773	1	-0.00265256	0.00542838	0.625095	1
AFAP1;Actin filament-associated protein 1	AFAP1	Q8N556	0.0265309	0.00723692	0.000246686	0.349554	0.043972	0.00701285	3.64751e-10	5.16852e-07	0.00727239	0.0053699	0.175654	1
AFM;Afamin	AFM	P43652	0.0389985	0.00654151	2.51998e-09	3.57081e-06	0.176635	0.00633897	4.85954e-169	6.88597e-166	-0.029013	0.0048539	2.29103e-09	3.24639e-06
AFP;Alpha-fetoprotein	AFP	P02771	0.0880167	0.00703603	7.90071e-36	1.11953e-32	0.0623488	0.00681818	6.30179e-20	8.92964e-17	0.00753248	0.00522084	0.149094	1
AGBL2;Cytosolic carboxypeptidase 2	AGBL2	Q5U5Z8	0.0205736	0.00732471	0.00497543	1	-0.000711204	0.00709792	0.920187	1	-0.0100635	0.00543505	0.0640925	1
AGER;Advanced glycosylation end product-specific receptor	AGER	Q15109	0.011197	0.00692606	0.105962	1	0.0543645	0.00671161	5.66813e-16	8.03174e-13	0.00567489	0.00513924	0.269501	1
AGR2;Anterior gradient protein 2 homolog	AGR2	O95994	-0.123766	0.00715499	9.21128e-67	1.30524e-63	0.123782	0.00693345	5.64531e-71	7.9994e-68	0.000875254	0.00530911	0.869056	1
AGR3;Anterior gradient protein 3	AGR3	Q8TD06	-0.00991949	0.00687826	0.149269	1	0.243241	0.00666529	3.03276e-286	4.29742e-283	-0.0304203	0.00510377	2.54082e-09	3.60035e-06
AGRN;Agrin	AGRN	O00468	-0.0266447	0.00676107	8.13338e-05	0.11525	0.175984	0.00655173	2.43525e-157	3.45075e-154	0.000744754	0.00501681	0.881987	1
AGRP;Agouti-related protein	AGRP	O00253	-0.0848341	0.00647733	4.22305e-39	5.98406e-36	0.449818	0.00627677	0	0	0.0782709	0.00480627	2.07412e-59	2.93903e-56
AGT;Angiotensinogen	AGT	P01019	0.00212743	0.0072431	0.768975	1	0.035539	0.00701883	4.13968e-07	0.000586593	0.00110917	0.00537448	0.836498	1
AGXT;Serine--pyruvate aminotransferase	AGXT	P21549	-0.0120542	0.00699449	0.0848285	1	0.117621	0.00677792	3.52801e-67	4.99919e-64	-0.0194684	0.00519001	0.000176317	0.249842
AHCY;Adenosylhomocysteinase	AHCY	P23526	0.000324449	0.00722164	0.964165	1	0.0588302	0.00699803	4.37417e-17	6.1982e-14	0.00764096	0.00535856	0.153896	1
AHNAK;Neuroblast differentiation-associated protein AHNAK	AHNAK	Q09666	0.030829	0.00668388	3.99365e-06	0.00565901	0.133361	0.00647693	1.19793e-93	1.69746e-90	0.0184429	0.00495954	0.000200582	0.284225
AHNAK2;Protein AHNAK2	AHNAK2	Q8IVF2	0.000853662	0.00712695	0.904659	1	0.0423462	0.00690628	8.79523e-10	1.24628e-06	-0.0131389	0.0052883	0.0129774	1
AHSA1;Activator of 90 kDa heat shock protein ATPase homolog 1	AHSA1	O95433	-0.0171893	0.00731485	0.0187829	1	0.0491249	0.00708836	4.2699e-12	6.05045e-09	-0.0115635	0.00542773	0.0331408	1
AHSG;Alpha-2-HS-glycoprotein	AHSG	P02765	0.0521502	0.00717591	3.74086e-13	5.30079e-10	0.107697	0.00695372	6.33252e-54	8.97318e-51	-0.00662036	0.00532463	0.213749	1
AHSP;Alpha-hemoglobin-stabilizing protein	AHSP	Q9NZD4	-0.0319773	0.00701184	5.12105e-06	0.00725653	0.0893622	0.00679473	2.0611e-39	2.92057e-36	0.000194516	0.00520289	0.970177	1
AIDA;Axin interactor, dorsalization-associated protein	AIDA	Q96BJ3	-0.0158048	0.00731726	0.030785	1	0.0106968	0.0070907	0.131418	1	-0.00555581	0.00542952	0.306192	1
AIF1;Allograft inflammatory factor 1	AIF1	P55008	0.00365006	0.00724607	0.614455	1	0.107591	0.00702171	7.98819e-53	1.13193e-49	0.00119507	0.00537669	0.824106	1
AIF1L;Allograft inflammatory factor 1-like	AIF1L	Q9BQI0	0.0105073	0.00730405	0.150285	1	0.0127764	0.0070779	0.0710664	1	0.00530105	0.00541972	0.328029	1
AIFM1;Apoptosis-inducing factor 1, mitochondrial	AIFM1	O95831	-0.0327573	0.0070827	3.75975e-06	0.00532757	0.170491	0.0068634	4.75998e-135	6.7449e-132	0.00114255	0.00525547	0.827896	1
AK1;Adenylate kinase isoenzyme 1	AK1	P00568	0.000628726	0.00712993	0.929733	1	0.0989658	0.00690917	2.09713e-46	2.97164e-43	0.00268348	0.00529052	0.612001	1
AK2;Adenylate kinase 2, mitochondrial	AK2	P54819	0.0145099	0.00729142	0.0465994	1	0.0782206	0.00706566	1.94246e-28	2.75246e-25	-0.00123572	0.00541034	0.819336	1
AKAP12;A-kinase anchor protein 12	AKAP12	Q02952	0.0368586	0.00727498	4.07257e-07	0.000577084	-0.0116991	0.00704973	0.0970216	1	-0.00307531	0.00539814	0.568887	1
AKR1B1;Aldo-keto reductase family 1 member B1	AKR1B1	P15121	0.0183754	0.00728532	0.0116648	1	0.079357	0.00705974	2.88364e-29	4.08612e-26	-0.00715298	0.00540581	0.185777	1
AKR1B10;Aldo-keto reductase family 1 member B10	AKR1B10	O60218	-0.0184682	0.00725906	0.0109584	1	0.02219	0.0070343	0.00160883	1	-0.0144542	0.00538633	0.00728929	1
AKR1C4;Aldo-keto reductase family 1 member C4	AKR1C4	P17516	-0.0146792	0.00729631	0.0442414	1	0.0415512	0.0070704	4.2207e-09	5.98073e-06	-0.00601385	0.00541397	0.266661	1
AKR7L;Aflatoxin B1 aldehyde reductase member 4	AKR7L	Q8NHP1	-0.0255639	0.00713211	0.000338392	0.479502	0.0823693	0.00691128	1.10097e-32	1.56007e-29	-0.0185133	0.00529213	0.000468868	0.664386
AKT1S1;Proline-rich AKT1 substrate 1	AKT1S1	Q96B36	0.00629907	0.00721068	0.382356	1	0.147	0.00698742	1.18124e-97	1.67381e-94	0.000452537	0.00535043	0.932596	1
AKT2;RAC-beta serine/threonine-protein kinase	AKT2	P31751	0.0375677	0.00727924	2.47046e-07	0.000350065	0.0842843	0.00705385	7.63367e-33	1.08169e-29	-0.0013152	0.0054013	0.807622	1
AKT3;RAC-gamma serine/threonine-protein kinase	AKT3	Q9Y243	0.0403637	0.00728635	3.05269e-08	4.32567e-05	0.0677649	0.00706074	8.71594e-22	1.23505e-18	-0.00506136	0.00540658	0.349203	1
ALCAM;CD166 antigen	ALCAM	Q13740	0.00111524	0.00673964	0.868571	1	0.0419823	0.00653096	1.30777e-10	1.85311e-07	9.16666e-05	0.00500091	0.985376	1
ALDH1A1;Retinal dehydrogenase 1	ALDH1A1	P00352	-0.0182291	0.00680874	0.00742486	1	0.140796	0.00659792	2.10981e-100	2.98961e-97	-0.0314042	0.00505218	5.15775e-10	7.30853e-07
ALDH2;Aldehyde dehydrogenase, mitochondrial	ALDH2	P05091	-0.0347891	0.0073095	1.94907e-06	0.00276183	0.0450366	0.00708318	2.06556e-10	2.9269e-07	-0.00620838	0.00542376	0.252356	1
ALDH3A1;Aldehyde dehydrogenase, dimeric NADP-preferring	ALDH3A1	P30838	0.00646306	0.00687828	0.347412	1	0.0290209	0.00666531	1.34044e-05	0.018994	-0.0114781	0.00510379	0.0245225	1
ALDH5A1;Succinate-semialdehyde dehydrogenase, mitochondrial	ALDH5A1	P51649	-0.0154188	0.0072747	0.0340546	1	0.0919284	0.00704946	8.85288e-39	1.25445e-35	-0.0158479	0.00539794	0.0033278	1
ALMS1;Alstrom syndrome protein 1	ALMS1	Q8TCU4	0.00491524	0.00732783	0.502376	1	0.00029802	0.00710094	0.966524	1	0.0016603	0.00543736	0.760101	1
ALPI;Intestinal-type alkaline phosphatase	ALPI	P09923	-0.140024	0.00726146	1.97938e-82	2.80479e-79	0.100203	0.00703662	6.92226e-46	9.80885e-43	-0.00632176	0.00538811	0.240692	1
ALPP;Alkaline phosphatase, placental type	ALPP	P05187	-0.0265132	0.00608677	1.32911e-05	0.0188334	0.0427835	0.0058983	4.14399e-13	5.87203e-10	0.000856444	0.00451647	0.849603	1
AMBN;Ameloblastin	AMBN	Q9NP70	-0.0179392	0.00729578	0.0139432	1	-0.0305617	0.00706988	1.54483e-05	0.0218902	0.00364412	0.00541358	0.50086	1
AMBP;Protein AMBP	AMBP	P02760	-0.00388516	0.00655711	0.553512	1	0.170744	0.00635408	1.83493e-157	2.60009e-154	0.0358304	0.00486547	1.82081e-13	2.58009e-10
AMDHD2;N-acetylglucosamine-6-phosphate deacetylase	AMDHD2	Q9Y303	-0.00266201	0.00732983	0.716477	1	0.00286862	0.00710288	0.686312	1	-0.00238136	0.00543885	0.661503	1
AMFR;E3 ubiquitin-protein ligase AMFR	AMFR	Q9UKV5	0.00465949	0.00729679	0.523109	1	0.0522783	0.00707087	1.46204e-13	2.07171e-10	0.00163873	0.00541433	0.762147	1
AMIGO1;Amphoterin-induced protein 1	AMIGO1	Q86WK6	-0.00971491	0.0073262	0.184832	1	0.0122517	0.00709936	0.0844016	1	-0.00160406	0.00543615	0.76794	1
AMIGO2;Amphoterin-induced protein 2	AMIGO2	Q86SJ2	-0.0357737	0.00720867	6.98831e-07	0.000990243	0.0773973	0.00698547	1.75304e-28	2.48405e-25	-0.0066317	0.00534894	0.215052	1
AMN;Protein amnionless	AMN	Q9BXJ7	-0.017968	0.0071655	0.0121607	1	0.132323	0.00694364	1.47147e-80	2.08507e-77	0.00097413	0.00531691	0.854632	1
AMOT;Angiomotin	AMOT	Q4VCS5	-0.0925379	0.00657282	6.77979e-45	9.60696e-42	0.124684	0.00636931	7.03698e-85	9.97141e-82	-0.015983	0.00487713	0.00104967	1
AMOTL2;Angiomotin-like protein 2	AMOTL2	Q9Y2J4	0.00390942	0.00728428	0.591483	1	0.0755993	0.00705874	1.00415e-26	1.42288e-23	-0.00183939	0.00540505	0.733625	1
AMPD3;AMP deaminase 3	AMPD3	Q01432	-0.0372317	0.00725965	2.93489e-07	0.000415873	0.0900601	0.00703487	1.93755e-37	2.74551e-34	-0.000220843	0.00538677	0.967298	1
AMY1A_AMY1B_AMY1C;Alpha-amylase 1A_Alpha-amylase 1B_Alpha-amylase 1C	AMY1A_AMY1B_AMY1C	P0DUB6_P0DTE7_P0DTE8	-0.00163008	0.00706292	0.817476	1	0.0100858	0.00684424	0.140593	1	0.0157628	0.00524079	0.00263407	1
AMY2A;Pancreatic alpha-amylase	AMY2A	P04746	-0.00354818	0.00705776	0.615154	1	-0.0047691	0.00683923	0.48561	1	0.0158596	0.00523696	0.00246026	1
AMY2B;Alpha-amylase 2B	AMY2B	P19961	-0.00760936	0.00709487	0.283496	1	-0.00606937	0.00687519	0.377354	1	0.0168363	0.0052645	0.00138464	1
ANG;Angiogenin	ANG	P03950	0.00808723	0.00685308	0.237974	1	0.13392	0.00664089	6.27005e-90	8.88466e-87	0.0301693	0.00508509	3.00395e-09	4.2566e-06
ANGPT1;Angiopoietin-1	ANGPT1	Q15389	0.000812549	0.00721575	0.910342	1	0.133802	0.00699233	3.30345e-81	4.68099e-78	-0.00319824	0.00535419	0.550289	1
ANGPT2;Angiopoietin-2	ANGPT2	O15123	-0.112983	0.00696915	6.7993e-59	9.63461e-56	0.0372782	0.00675336	3.41493e-08	4.83896e-05	0.00127003	0.00517121	0.805997	1
ANGPTL1;Angiopoietin-related protein 1	ANGPTL1	O95841	-0.0555297	0.0070932	5.07118e-15	7.18587e-12	0.112239	0.00687358	1.01566e-59	1.43918e-56	0.00695173	0.00526326	0.186575	1
ANGPTL2;Angiopoietin-related protein 2	ANGPTL2	Q9UKU9	0.0316259	0.00673993	2.71143e-06	0.00384209	0.156004	0.00653124	4.25289e-125	6.02635e-122	0.0204167	0.00500113	4.46695e-05	0.0632967
ANGPTL3;Angiopoietin-related protein 3	ANGPTL3	Q9Y5C1	0.104159	0.00647685	5.51628e-58	7.81657e-55	0.0633076	0.0062763	6.81213e-24	9.65279e-21	-0.004368	0.00480592	0.363419	1
ANGPTL4;Angiopoietin-related protein 4	ANGPTL4	Q9BY76	-0.0299347	0.00697003	1.75336e-05	0.0248451	-0.020252	0.00675422	0.00271565	1	0.0179756	0.00517187	0.000510231	0.722998
ANGPTL7;Angiopoietin-related protein 7	ANGPTL7	O43827	-0.0692274	0.00703913	8.54212e-23	1.21042e-19	0.152662	0.00682118	3.5677e-110	5.05543e-107	-0.0155197	0.00522314	0.00296697	1
ANK2;Ankyrin-2	ANK2	Q01484	-0.00451123	0.00732552	0.538015	1	0.00671746	0.0070987	0.344005	1	0.00933586	0.00543564	0.0858917	1
ANKMY2;Ankyrin repeat and MYND domain-containing protein 2	ANKMY2	Q8IV38	0.0167369	0.00728268	0.0215578	1	0.0950947	0.00705719	2.78307e-41	3.94362e-38	-0.00343302	0.00540386	0.525243	1
ANKRA2;Ankyrin repeat family A protein 2	ANKRA2	Q9H9E1	-0.0139326	0.00732749	0.0572556	1	0.00737172	0.00710061	0.299192	1	0.00300497	0.0054371	0.580488	1
ANKRD54;Ankyrin repeat domain-containing protein 54	ANKRD54	Q6NXT1	-0.0237546	0.0072253	0.00101111	1	0.136611	0.00700158	2.45062e-84	3.47253e-81	0.00106761	0.00536128	0.842159	1
ANP32C;Acidic leucine-rich nuclear phosphoprotein 32 family member C	ANP32CP	O43423	-0.00131351	0.00732669	0.857721	1	-0.00373272	0.00709984	0.599067	1	0.00242373	0.00543651	0.655726	1
ANPEP;Aminopeptidase N	ANPEP	P15144	0.0903186	0.00721396	6.9222e-36	9.80876e-33	0.0154471	0.0069906	0.0271328	1	-0.00438214	0.00535287	0.41299	1
ANXA1;Annexin A1	ANXA1	P04083	-0.00879568	0.00719177	0.22133	1	0.0704817	0.00696909	5.19229e-24	7.35748e-21	0.00572651	0.0053364	0.283232	1
ANXA10;Annexin A10	ANXA10	Q9UJ72	-0.0466391	0.00713124	6.23093e-11	8.82922e-08	0.0566643	0.00691043	2.48834e-16	3.52598e-13	0.00191376	0.00529148	0.717603	1
ANXA11;Annexin A11	ANXA11	P50995	0.0423779	0.00726167	5.39913e-09	7.65057e-06	0.102844	0.00703683	3.11227e-48	4.41008e-45	0.00138415	0.00538827	0.797272	1
ANXA2;Annexin A2	ANXA2	P07355	-0.0534561	0.00710035	5.24844e-14	7.43703e-11	0.134774	0.0068805	5.56831e-85	7.8903e-82	-0.00305839	0.00526856	0.561582	1
ANXA3;Annexin A3	ANXA3	P12429	0.0204864	0.00726017	0.00477891	1	0.0909689	0.00703537	3.71253e-38	5.26065e-35	-0.00258375	0.00538715	0.631505	1
ANXA4;Annexin A4	ANXA4	P09525	0.0402651	0.00729086	3.36215e-08	4.76416e-05	0.0598903	0.00706511	2.40102e-17	3.40224e-14	-0.00343896	0.00540992	0.524992	1
ANXA5;Annexin A5	ANXA5	P08758	-0.00879547	0.00725843	0.225613	1	0.00881335	0.00703369	0.210207	1	0.00188498	0.00538586	0.726351	1
AOC1;Amiloride-sensitive amine oxidase [copper-containing]	AOC1	P19801	0.0124124	0.00732482	0.0901664	1	0.0117892	0.00709802	0.096739	1	-0.00576236	0.00543512	0.289057	1
AOC3;Membrane primary amine oxidase	AOC3	Q16853	0.0480026	0.00685526	2.56303e-12	3.63181e-09	-0.0358151	0.006643	7.03559e-08	9.96943e-05	-0.00344236	0.00508671	0.498577	1
AP1G2;AP-1 complex subunit gamma-like 2	AP1G2	O75843	0.00638169	0.00716486	0.3731	1	0.183208	0.00694302	5.75773e-152	8.1587e-149	0.00826955	0.00531643	0.119843	1
AP2B1;AP-2 complex subunit beta	AP2B1	P63010	-0.0289706	0.00724258	6.34598e-05	0.0899225	0.155582	0.00701833	3.84734e-108	5.45168e-105	0.0137037	0.0053741	0.0107779	1
AP3B1;AP-3 complex subunit beta-1	AP3B1	O00203	-0.00739733	0.00719768	0.30408	1	0.159803	0.00697482	2.49181e-115	3.53089e-112	0.0145022	0.00534079	0.00662325	1
AP3S2;AP-3 complex subunit sigma-2	AP3S2	P59780	-0.0255548	0.00718916	0.000379016	0.537065	0.193293	0.00696656	1.24607e-167	1.76569e-164	0.0113192	0.00533446	0.0338527	1
APBB1IP;Amyloid beta A4 precursor protein-binding family B member 1-interacting protein	APBB1IP	Q7Z5R6	-0.0160154	0.00700851	0.0223109	1	0.158639	0.0067915	9.19601e-120	1.30307e-116	-0.00151421	0.00520041	0.770922	1
APCS;Serum amyloid P-component	APCS	P02743	0.116151	0.00587083	1.19908e-86	1.6991e-83	0.171834	0.00568906	6.98426e-198	9.8967e-195	0.0444313	0.00435625	2.15609e-24	3.05519e-21
APEX1;DNA-(apurinic or apyrimidinic site) endonuclease	APEX1	P27695	-0.0429555	0.0071074	1.52055e-09	2.15462e-06	0.151903	0.00688734	4.5035e-107	6.38146e-104	-0.00573381	0.0052738	0.276944	1
APLP1;Amyloid-like protein 1	APLP1	P51693	0.0864111	0.00690882	8.10752e-36	1.14884e-32	-0.119783	0.0066949	2.82955e-71	4.00947e-68	-0.000778437	0.00512645	0.879308	1
APOA1;Apolipoprotein A-I	APOA1	P02647	0.18656	0.00681	1.63415e-163	2.31559e-160	-0.156541	0.00659915	2.01895e-123	2.86086e-120	-0.0165066	0.00505312	0.00108945	1
APOA2;Apolipoprotein A-II	APOA2	P02652	0.119328	0.00684439	8.70236e-68	1.23312e-64	-0.194038	0.00663247	6.36134e-186	9.01402e-183	-0.015807	0.00507864	0.00185694	1
APOA4;Apolipoprotein A-IV	APOA4	P06727	0.00993154	0.00714362	0.164457	1	0.0345448	0.00692244	6.05806e-07	0.000858427	-0.00271599	0.00530067	0.608384	1
APOBR;Apolipoprotein B receptor	APOBR	Q0VD83	0.0574706	0.00726628	2.66522e-15	3.77662e-12	-0.0588152	0.0070413	6.90126e-17	9.77908e-14	0.00766949	0.00539169	0.1549	1
APOC1;Apolipoprotein C-I	APOC1	P02654	0.258618	0.00659899	0	0	0.0495326	0.00639466	9.74226e-15	1.38048e-11	-0.0102345	0.00489655	0.0366119	1
APOD;Apolipoprotein D	APOD	P05090	0.156741	0.00691905	8.2279e-113	1.16589e-109	-0.140589	0.00670481	4.99223e-97	7.07398e-94	0.000200765	0.00513403	0.968807	1
APOE;Apolipoprotein E	APOE	P02649	-0.0452874	0.00719423	3.11105e-10	4.40835e-07	0.173027	0.00697148	7.99966e-135	1.13355e-131	0.015687	0.00533823	0.00329892	1
APOF;Apolipoprotein F	APOF	Q13790	0.230026	0.00561767	0	0	-0.144857	0.00544373	1.75968e-154	2.49346e-151	0.0334373	0.00416839	1.07563e-15	1.52416e-12
APOH;Beta-2-glycoprotein 1	APOH	P02749	0.0497577	0.0072483	6.77136e-12	9.59501e-09	-0.0646809	0.00702388	3.47703e-20	4.92695e-17	-0.0499232	0.00537835	1.75087e-20	2.48099e-17
APOL1;Apolipoprotein L1	APOL1	O14791	0.0974788	0.006886	2.28103e-45	3.23221e-42	0.0463409	0.00667279	3.85671e-12	5.46496e-09	0.0186848	0.00510951	0.000255693	0.362317
APOM;Apolipoprotein M	APOM	O95445	0.39537	0.00649015	0	0	-0.027271	0.00628919	1.45387e-05	0.0206014	0.0105602	0.00481578	0.0283268	1
APP;Amyloid-beta precursor protein	APP	P05067	-0.00536295	0.00721882	0.45754	1	0.131971	0.00699531	5.36762e-79	7.60591e-76	0.000446552	0.00535647	0.93356	1
APPL2;DCC-interacting protein 13-beta	APPL2	Q8NEU8	0.0631574	0.00725879	3.43526e-18	4.86776e-15	0.0809787	0.00703404	1.296e-30	1.83644e-27	-0.00180016	0.00538613	0.738214	1
APRT;Adenine phosphoribosyltransferase	APRT	P07741	-0.00782869	0.00725351	0.280463	1	0.0681654	0.00702892	3.28263e-22	4.65149e-19	-0.00901244	0.00538221	0.0940439	1
ARAF;Serine/threonine-protein kinase A-Raf	ARAF	P10398	0.000182275	0.00729951	0.980078	1	0.0874443	0.00707349	4.94488e-35	7.00689e-32	0.00196016	0.00541634	0.717431	1
AREG;Amphiregulin	AREG	P15514	-0.157099	0.00719454	5.27087e-105	7.46883e-102	0.0684584	0.00697178	9.93854e-23	1.40829e-19	0.00038411	0.00533845	0.942641	1
ARF6;ADP-ribosylation factor 6	ARF6	P62330	-0.00987767	0.00715565	0.167472	1	0.203631	0.00693409	2.66009e-187	3.76934e-184	0.0138555	0.0053096	0.00907083	1
ARFIP1;Arfaptin-1	ARFIP1	P53367	0.0310586	0.00728415	2.01447e-05	0.0285451	0.0835622	0.00705861	2.84744e-32	4.03482e-29	-0.000837517	0.00540495	0.876859	1
ARG1;Arginase-1	ARG1	P05089	-0.0086711	0.00729574	0.234638	1	0.0616335	0.00706984	2.95788e-18	4.19132e-15	-0.0115307	0.00541355	0.0331811	1
ARG2;Arginase-2, mitochondrial	ARG2	P78540	-0.0206991	0.00730836	0.00462471	1	0.0194805	0.00708207	0.00595038	1	0.00261496	0.00542291	0.629662	1
ARHGAP1;Rho GTPase-activating protein 1	ARHGAP1	Q07960	0.0156077	0.00726492	0.0316911	1	0.0746907	0.00703998	2.94846e-26	4.17796e-23	-0.0153472	0.00539068	0.00441611	1
ARHGAP25;Rho GTPase-activating protein 25	ARHGAP25	P42331	0.00942363	0.00725329	0.193877	1	0.0952719	0.00702871	9.46199e-42	1.34076e-38	-0.00519608	0.00538205	0.334328	1
ARHGAP30;Rho GTPase-activating protein 30	ARHGAP30	Q7Z6I6	-0.0159387	0.00731199	0.0292783	1	0.0086917	0.00708559	0.219954	1	-0.00846932	0.0054256	0.118535	1
ARHGAP45;Rho GTPase-activating protein 45	ARHGAP45	Q92619	0.0544332	0.00723963	5.65999e-14	8.02021e-11	0.0978308	0.00701547	4.41949e-44	6.26242e-41	-0.00446161	0.00537191	0.406237	1
ARHGAP5;Rho GTPase-activating protein 5	ARHGAP5	Q13017	-0.0175343	0.00732092	0.0166211	1	0.0353059	0.00709425	6.49828e-07	0.000920806	-0.00133557	0.00543223	0.805792	1
ARHGEF1;Rho guanine nucleotide exchange factor 1	ARHGEF1	Q92888	0.000583794	0.00718176	0.935213	1	0.166315	0.00695939	3.197e-125	4.53015e-122	0.0137725	0.00532897	0.00975699	1
ARHGEF10;Rho guanine nucleotide exchange factor 10	ARHGEF10	O15013	0.0101892	0.00725638	0.160275	1	0.102146	0.0070317	1.13191e-47	1.60392e-44	0.0052592	0.00538434	0.328695	1
ARHGEF12;Rho guanine nucleotide exchange factor 12	ARHGEF12	Q9NZN5	0.0170278	0.00722933	0.0185092	1	0.137361	0.00700549	3.78821e-85	5.36789e-82	0.0115177	0.00536427	0.0317905	1
ARHGEF5;Rho guanine nucleotide exchange factor 5	ARHGEF5	Q12774	-0.0196489	0.00731063	0.00719756	1	0.015378	0.00708427	0.0299584	1	-0.00158807	0.00542459	0.769713	1
ARID3A;AT-rich interactive domain-containing protein 3A	ARID3A	Q99856	0.00515282	0.0073246	0.481752	1	-0.00565766	0.00709781	0.425399	1	-0.00708058	0.00543496	0.192657	1
ARID4B;AT-rich interactive domain-containing protein 4B	ARID4B	Q4LE39	-0.0143369	0.00730781	0.0497869	1	0.0599213	0.00708154	2.73708e-17	3.87844e-14	0.00348664	0.0054225	0.520232	1
ARL13B;ADP-ribosylation factor-like protein 13B	ARL13B	Q3SXY8	0.00231924	0.00726203	0.749452	1	0.116486	0.00703718	2.59718e-61	3.6802e-58	0.00786744	0.00538853	0.14429	1
ARL2BP;ADP-ribosylation factor-like protein 2-binding protein	ARL2BP	Q9Y2Y0	0.0410554	0.00727878	1.70925e-08	2.422e-05	0.0774852	0.00705341	4.98275e-28	7.06055e-25	-0.0008217	0.00540096	0.879078	1
ARMCX2;Armadillo repeat-containing X-linked protein 2	ARMCX2	Q7L311	0.00501331	0.00731874	0.493351	1	-0.0110277	0.00709213	0.119973	1	0.00334	0.00543061	0.538538	1
ARNT;Aryl hydrocarbon receptor nuclear translocator	ARNT	P27540	-0.0201997	0.00730433	0.00568764	1	0.0109074	0.00707817	0.123329	1	-0.00467906	0.00541992	0.387974	1
ARNTL;Aryl hydrocarbon receptor nuclear translocator-like protein 1	BMAL1	O00327	0.0179098	0.0073254	0.0144942	1	-0.01356	0.00709858	0.0561095	1	-0.0047723	0.00543555	0.379961	1
ARSA;Arylsulfatase A	ARSA	P15289	-0.0437089	0.00695414	3.31039e-10	4.69082e-07	0.0961964	0.00673882	4.21529e-46	5.97306e-43	-0.0262017	0.00516007	3.83804e-07	0.00054385
ARSB;Arylsulfatase B	ARSB	P15848	0.000622201	0.00712453	0.930408	1	0.130221	0.00690393	5.76145e-79	8.16397e-76	-0.0142346	0.0052865	0.00709236	1
ART3;Ecto-ADP-ribosyltransferase 3	ART3	Q13508	0.0159535	0.00653048	0.0145738	1	-0.0280082	0.00632828	9.63365e-06	0.0136509	0.00131924	0.00484571	0.785433	1
ART5;Ecto-ADP-ribosyltransferase 5	ART5	Q96L15	0.0111419	0.00732572	0.128288	1	-0.0176248	0.0070989	0.013042	1	-0.00242887	0.0054358	0.655001	1
ARTN;Artemin	ARTN	Q5T4W7	-0.000641164	0.00732356	0.930236	1	0.0237099	0.0070968	0.000835854	1	0.00810065	0.00543419	0.136054	1
ASAH1;Acid ceramidase	ASAH1	Q13510	-0.030759	0.00715646	1.72742e-05	0.0244776	0.120896	0.00693487	8.92511e-68	1.26469e-64	-0.00287266	0.0053102	0.588531	1
ASAH2;Neutral ceramidase	ASAH2	Q9NR71	0.0214344	0.00694974	0.00204259	1	0.102501	0.00673455	3.80681e-52	5.39426e-49	-0.0198776	0.00515681	0.000116108	0.164525
ASGR1;Asialoglycoprotein receptor 1	ASGR1	P07306	-0.0609102	0.00643383	3.0473e-21	4.31802e-18	0.198912	0.00623462	3.17933e-220	4.50511e-217	-0.00377145	0.004774	0.429533	1
ASGR2;Asialoglycoprotein receptor 2	ASGR2	P07307	0.0474334	0.00707132	2.00483e-11	2.84084e-08	0.0418963	0.00685237	9.80978e-10	1.39005e-06	0.0127536	0.00524702	0.0150772	1
ASPN;Asporin	ASPN	Q9BXN1	0.176643	0.00700051	3.01562e-139	4.27313e-136	-0.0629275	0.00678375	1.85287e-20	2.62551e-17	-0.068656	0.00519448	8.69492e-40	1.23207e-36
ASPSCR1;Tether containing UBX domain for GLUT4	ASPSCR1	Q9BZE9	0.012511	0.00720152	0.082347	1	0.121235	0.00697854	2.5434e-67	3.60399e-64	0.00309842	0.00534364	0.56203	1
ASRGL1;Isoaspartyl peptidase/L-asparaginase	ASRGL1	Q7L266	0.0412152	0.00727174	1.45721e-08	2.06486e-05	0.0820774	0.00704658	2.68606e-31	3.80615e-28	-0.00490122	0.00539574	0.363699	1
ASS1;Argininosuccinate synthase	ASS1	P00966	0.050701	0.00686998	1.61665e-13	2.29079e-10	0.0671208	0.00665726	7.12522e-24	1.00964e-20	-0.0287405	0.00509762	1.73337e-08	2.45618e-05
ATF2;Cyclic AMP-dependent transcription factor ATF-2	ATF2	P15336	-0.00303649	0.00732139	0.678333	1	0.0175542	0.0070947	0.0133555	1	0.00336372	0.00543258	0.535804	1
ATF4;Cyclic AMP-dependent transcription factor ATF-4	ATF4	P18848	0.00200476	0.00732899	0.784441	1	0.00749328	0.00710206	0.291394	1	0.00618086	0.00543822	0.25573	1
ATG16L1;Autophagy-related protein 16-1	ATG16L1	Q676U5	0.0158348	0.00718779	0.0276004	1	0.160451	0.00696524	1.47814e-116	2.09452e-113	0.0117131	0.00533345	0.028087	1
ATG4A;Cysteine protease ATG4A	ATG4A	Q8WYN0	-0.0180928	0.00721283	0.0121315	1	0.129585	0.0069895	2.27173e-76	3.21905e-73	-0.00987015	0.00535202	0.0651637	1
ATOX1;Copper transport protein ATOX1	ATOX1	O00244	0.0365207	0.00721056	4.10694e-07	0.000581953	0.0820876	0.0069873	8.27845e-32	1.17306e-28	-0.00156553	0.00535034	0.769827	1
ATP1B1;Sodium/potassium-transporting ATPase subunit beta-1	ATP1B1	P05026	-0.0108062	0.0073214	0.139961	1	0.00508087	0.00709471	0.473904	1	-0.000110853	0.00543259	0.98372	1
ATP1B2;Sodium/potassium-transporting ATPase subunit beta-2	ATP1B2	P14415	0.00319318	0.00731878	0.662622	1	-0.0287392	0.00709217	5.08367e-05	0.0720355	-0.00467394	0.00543065	0.389431	1
ATP1B3;Sodium/potassium-transporting ATPase subunit beta-3	ATP1B3	P54709	0.00545326	0.00732382	0.456523	1	-0.0283487	0.00709706	6.49813e-05	0.0920785	0.00902523	0.00543439	0.09677	1
ATP1B4;Protein ATP1B4	ATP1B4	Q9UN42	-0.00793099	0.00732516	0.278947	1	0.000365753	0.00709835	0.958906	1	-0.00109734	0.00543538	0.840006	1
ATP2B4;Plasma membrane calcium-transporting ATPase 4	ATP2B4	P23634	-0.00504361	0.00731363	0.490439	1	-0.0103239	0.00708718	0.145206	1	-0.0025894	0.00542682	0.63326	1
ATP5F1D;ATP synthase subunit delta, mitochondrial	ATP5F1D	P30049	0.000305161	0.00732774	0.966782	1	0.00860399	0.00710086	0.225642	1	-0.00010133	0.0054373	0.985132	1
ATP5IF1;ATPase inhibitor, mitochondrial	ATP5IF1	Q9UII2	0.0280826	0.00722126	0.000100892	0.142964	0.12869	0.00699767	3.52542e-75	4.99553e-72	0.01328	0.00535829	0.0132021	1
ATP5PO;ATP synthase subunit O, mitochondrial	ATP5PO	P48047	-0.00107684	0.00732784	0.88317	1	0.0116628	0.00710095	0.10051	1	-0.0059524	0.00543737	0.273647	1
ATP6AP2;Renin receptor	ATP6AP2	O75787	-0.0162547	0.00721779	0.0243268	1	0.124112	0.00699431	3.82851e-70	5.425e-67	0.0145848	0.00535571	0.00646813	1
ATP6V1D;V-type proton ATPase subunit D	ATP6V1D	Q9Y5K8	0.0136638	0.00732527	0.0621488	1	0.0147225	0.00709846	0.0380827	1	0.00130379	0.00543546	0.810434	1
ATP6V1F;V-type proton ATPase subunit F	ATP6V1F	Q16864	0.00718318	0.00728562	0.324169	1	0.070104	0.00706003	3.3166e-23	4.69963e-20	-0.00863805	0.00540604	0.110085	1
ATP6V1G1;V-type proton ATPase subunit G 1	ATP6V1G1	O75348	-0.00402992	0.00720304	0.575842	1	0.162762	0.00698002	2.32575e-119	3.29558e-116	-0.0021862	0.00534477	0.682515	1
ATP6V1G2;V-type proton ATPase subunit G 2	ATP6V1G2	O95670	-0.000581056	0.00731879	0.936721	1	0.0426958	0.00709218	1.76009e-09	2.49404e-06	-0.00488731	0.00543065	0.368153	1
ATRAID;All-trans retinoic acid-induced differentiation factor	ATRAID	Q6UW56	-0.0621889	0.00711441	2.40519e-18	3.40815e-15	0.04024	0.00689412	5.36582e-09	7.60336e-06	0.011281	0.00527899	0.0326075	1
ATRN;Attractin, Isoform 2	ATRN	O75882-2	0.126794	0.00680773	4.7311e-77	6.70397e-74	0.140313	0.00659694	9.24843e-100	1.3105e-96	-0.0164929	0.00505144	0.00109572	1
ATXN10;Ataxin-10	ATXN10	Q9UBB4	-0.0190491	0.00731909	0.00925425	1	0.0398026	0.00709247	2.01562e-08	2.85614e-05	0.0112479	0.00543087	0.038357	1
ATXN2;Ataxin-2	ATXN2	Q99700	-0.0118609	0.00729972	0.104204	1	0.0587022	0.0070737	1.09004e-16	1.54459e-13	0.00547438	0.0054165	0.312173	1
ATXN2L;Ataxin-2-like protein	ATXN2L	Q8WWM7	0.00348198	0.00725082	0.631075	1	0.123774	0.00702632	3.69428e-69	5.23479e-66	0.0037266	0.00538022	0.488535	1
ATXN3;Ataxin-3	ATXN3	P54252	-0.0141783	0.00717396	0.0481217	1	0.156316	0.00695184	3.48837e-111	4.94303e-108	0.00103584	0.00532319	0.845715	1
AXIN1;Axin-1	AXIN1	O15169	0.0185146	0.00720837	0.0102186	1	0.140964	0.00698518	4.69678e-90	6.65534e-87	0.0019972	0.00534872	0.708854	1
AXL;Tyrosine-protein kinase receptor UFO	AXL	P30530	-0.0525224	0.00720743	3.22957e-13	4.5763e-10	0.0321964	0.00698427	4.04376e-06	0.00573001	0.00224611	0.00534802	0.674496	1
AZI2;5-azacytidine-induced protein 2	AZI2	Q9H6S1	0.00566815	0.00723999	0.433694	1	0.132847	0.00701582	1.44961e-79	2.0541e-76	0.00242544	0.00537218	0.651645	1
AZU1;Azurocidin	AZU1	P20160	-0.0552377	0.00723012	2.22821e-14	3.15738e-11	0.0892365	0.00700626	4.46417e-37	6.32573e-34	0.00342313	0.00536486	0.523435	1
B2M;Beta-2-microglobulin	B2M	P61769	-0.0873126	0.00693076	2.5989e-36	3.68264e-33	0.0801366	0.00671616	9.33289e-33	1.32247e-29	0.000382669	0.00514272	0.940685	1
B3GAT3;Galactosylgalactosylxylosylprotein 3-beta-glucuronosyltransferase 3	B3GAT3	O94766	0.0311887	0.00732299	2.05863e-05	0.0291708	-0.029271	0.00709625	3.71821e-05	0.0526871	0.00320091	0.00543377	0.555813	1
B3GNT7;UDP-GlcNAc:betaGal beta-1,3-N-acetylglucosaminyltransferase 7	B3GNT7	Q8NFL0	-0.0374478	0.00691581	6.17503e-08	8.75001e-05	0.0876377	0.00670167	5.49477e-39	7.78609e-36	-0.00157434	0.00513163	0.759005	1
B4GALT1;Beta-1,4-galactosyltransferase 1	B4GALT1	P15291	-0.0785005	0.00704546	8.75281e-29	1.24027e-25	0.120956	0.00682732	6.29298e-70	8.91715e-67	0.0527168	0.00522784	7.01589e-24	9.94151e-21
B4GAT1;Beta-1,4-glucuronyltransferase 1	B4GAT1	O43505	0.153457	0.00683891	9.84567e-111	1.39513e-107	0.0112109	0.00662716	0.0907206	1	0.0098004	0.00507457	0.0534569	1
BABAM1;BRISC and BRCA1-A complex member 1	BABAM1	Q9NWV8	0.00160421	0.00732435	0.826633	1	0.0312117	0.00709756	1.09813e-05	0.0155605	-0.00901471	0.00543477	0.0971831	1
BACH1;Transcription regulator protein BACH1	BACH1	O14867	-0.000476008	0.00722674	0.947484	1	0.142517	0.00700298	1.53097e-91	2.16938e-88	-0.00110882	0.00536235	0.836184	1
BAG3;BAG family molecular chaperone regulator 3	BAG3	O95817	0.0316375	0.00705714	7.38167e-06	0.0104598	0.0644424	0.00683863	4.62878e-21	6.55898e-18	0.00408349	0.0052365	0.435506	1
BAG4;BAG family molecular chaperone regulator 4	BAG4	O95429	0.00018574	0.00718383	0.979373	1	0.144561	0.0069614	3.26419e-95	4.62536e-92	-0.00113393	0.00533051	0.831543	1
BAG6;Large proline-rich protein BAG6	BAG6	P46379	0.0118734	0.007212	0.0997031	1	0.119535	0.00698869	2.53939e-65	3.59832e-62	0.0153392	0.00535141	0.00415425	1
BAIAP2;Brain-specific angiogenesis inhibitor 1-associated protein 2	BAIAP2	Q9UQB8	-0.0803963	0.00680598	3.8633e-32	5.4743e-29	0.226888	0.00659524	4.00056e-255	5.66879e-252	-0.00968045	0.00505014	0.0552626	1
BAMBI;BMP and activin membrane-bound inhibitor homolog	BAMBI	Q13145	-0.0112638	0.00718629	0.117029	1	0.0481061	0.00696378	4.99734e-12	7.08123e-09	0.00866617	0.00533234	0.104127	1
BANK1;B-cell scaffold protein with ankyrin repeats	BANK1	Q8NDB2	0.0127169	0.00720723	0.0776615	1	0.14517	0.00698407	2.17341e-95	3.07973e-92	0.00335881	0.00534787	0.529965	1
BAP18;Chromatin complexes subunit BAP18	BAP18	Q8IXM2	-0.0186275	0.00706233	0.00835346	1	0.144842	0.00684366	8.37796e-99	1.18716e-95	0.0150034	0.00524035	0.00419828	1
BATF;Basic leucine zipper transcriptional factor ATF-like	BATF	Q16520	-0.00674984	0.00732616	0.356882	1	0.0187222	0.00709932	0.00836363	1	-0.00469529	0.00543612	0.387747	1
BAX;Apoptosis regulator BAX	BAX	Q07812	-0.0218614	0.00729681	0.00273718	1	0.0622219	0.00707088	1.43228e-18	2.02954e-15	-0.0123467	0.00541434	0.0225921	1
BCAM;Basal cell adhesion molecule	BCAM	P50895	-0.0150213	0.00718676	0.0366132	1	-0.0206763	0.00696424	0.00299038	1	-0.0169727	0.00533268	0.00146002	1
BCAN;Brevican core protein	BCAN	Q96GW7	0.126273	0.00675224	1.15677e-77	1.63915e-74	-0.0558301	0.00654317	1.48754e-17	2.10785e-14	0.00134495	0.00501026	0.788362	1
BCAT1;Branched-chain-amino-acid aminotransferase, cytosolic	BCAT1	P54687	-0.00286634	0.00715897	0.688876	1	0.0883465	0.00693731	4.56162e-37	6.46381e-34	0.00240005	0.00531206	0.651407	1
BCAT2;Branched-chain-amino-acid aminotransferase, mitochondrial	BCAT2	O15382	4.90219e-05	0.0073199	0.994657	1	-0.0126384	0.00709326	0.0747995	1	-0.00612125	0.00543148	0.259752	1
BCHE;Cholinesterase	BCHE	P06276	0.111165	0.0066345	9.01945e-63	1.27806e-59	0.20202	0.00642907	8.83939e-214	1.25254e-210	0.0266775	0.0049229	6.02999e-08	8.5445e-05
BCL2;Apoptosis regulator Bcl-2	BCL2	P10415	-0.00473395	0.00720107	0.510931	1	0.0761396	0.0069781	1.12813e-27	1.59856e-24	0.013331	0.0053433	0.0126039	1
BCL2L1;Bcl-2-like protein 1	BCL2L1	Q07817	0.0221333	0.00726886	0.0023289	1	0.106451	0.0070438	1.93568e-51	2.74286e-48	0.00435651	0.0053936	0.419258	1
BCL2L11;Bcl-2-like protein 11, Isoform BimL	BCL2L11	O43521-2	-0.00771596	0.00722659	0.285655	1	0.0580117	0.00700283	1.23235e-16	1.74624e-13	-0.0023386	0.00536223	0.662749	1
BCL2L15;Bcl-2-like protein 15	BCL2L15	Q5TBC7	-0.0521043	0.00725623	7.07626e-13	1.00271e-09	0.0742974	0.00703155	4.67186e-26	6.62003e-23	0.00415184	0.00538423	0.440646	1
BCL7A;B-cell CLL/lymphoma 7 protein family member A	BCL7A	Q4VC05	-0.0134064	0.00732858	0.0673581	1	0.0193439	0.00710166	0.00645574	1	0.00339082	0.00543791	0.532926	1
BCL7B;B-cell CLL/lymphoma 7 protein family member B	BCL7B	Q9BQE9	0.000536201	0.0073201	0.941607	1	0.0150199	0.00709345	0.0342297	1	-0.00275253	0.00543163	0.612326	1
BCR;Breakpoint cluster region protein	BCR	P11274	0.014675	0.0072083	0.0417737	1	0.143763	0.00698511	1.43565e-93	2.03431e-90	0.00808957	0.00534867	0.130429	1
BDNF;Brain-derived neurotrophic factor	BDNF	P23560	0.0244817	0.00721911	0.000696556	0.987019	0.096096	0.00699559	7.89667e-43	1.11896e-39	-0.0107648	0.00535669	0.0444814	1
BECN1;Beclin-1	BECN1	Q14457	-0.0233677	0.00714102	0.0010677	1	0.198051	0.00691991	4.09192e-178	5.79825e-175	0.00813791	0.00529874	0.124592	1
BEX3;Protein BEX3	BEX3	Q00994	0.00686634	0.00732373	0.348484	1	-0.0151453	0.00709697	0.0328455	1	-0.00398027	0.00543432	0.463909	1
BGLAP;Osteocalcin	BGLAP	P02818	0.0479571	0.00694337	5.0376e-12	7.13828e-09	0.0901425	0.00672838	7.88716e-41	1.11761e-37	0.0124886	0.00515208	0.0153562	1
BGN;Biglycan	BGN	P21810	0.0240786	0.00715115	0.000760456	1	-0.10263	0.00692973	1.77491e-49	2.51505e-46	0.00155147	0.00530626	0.769994	1
BHLHE40;Class E basic helix-loop-helix protein 40	BHLHE40	O14503	-0.00828416	0.00732855	0.258317	1	0.0062944	0.00710163	0.375445	1	-0.00318232	0.00543789	0.558409	1
BHMT2;S-methylmethionine--homocysteine S-methyltransferase BHMT2	BHMT2	Q9H2M3	0.0319598	0.00732675	1.29199e-05	0.0183075	-0.0121674	0.00709989	0.0865832	1	0.00586475	0.00543655	0.280701	1
BID;BH3-interacting domain death agonist	BID	P55957	0.0101228	0.00714439	0.156523	1	0.160254	0.00692318	1.16462e-117	1.65027e-114	0.00547222	0.00530124	0.301961	1
BIN2;Bridging integrator 2	BIN2	Q9UBW5	0.0362496	0.00728052	6.42212e-07	0.000910014	0.073849	0.0070551	1.32864e-25	1.88269e-22	-0.00507161	0.00540225	0.347843	1
BIRC2;Baculoviral IAP repeat-containing protein 2	BIRC2	Q13490	0.0139993	0.00726224	0.053902	1	0.121333	0.00703738	2.43798e-66	3.45462e-63	-0.000954963	0.00538869	0.85934	1
BLMH;Bleomycin hydrolase	BLMH	Q13867	0.0688065	0.00710079	3.54508e-22	5.02338e-19	0.0689414	0.00688093	1.34994e-23	1.91286e-20	0.00346167	0.00526889	0.511184	1
BLNK;B-cell linker protein	BLNK	Q8WV28	-0.00465745	0.00718325	0.516746	1	0.10577	0.00696084	5.58036e-52	7.90738e-49	0.00331578	0.00533008	0.533887	1
BLOC1S2;Biogenesis of lysosome-related organelles complex 1 subunit 2	BLOC1S2	Q6QNY1	0.00272777	0.00732522	0.709612	1	0.00383927	0.00709841	0.588605	1	-0.00669992	0.00543542	0.217718	1
BLOC1S3;Biogenesis of lysosome-related organelles complex 1 subunit 3	BLOC1S3	Q6QNY0	0.0259221	0.00719009	0.000312279	0.442499	0.170299	0.00696746	7.5262e-131	1.06646e-127	0.0024783	0.00533515	0.642277	1
BLVRB;Flavin reductase	BLVRB	P30043	-0.0413404	0.00717757	8.49805e-09	1.20417e-05	0.0907886	0.00695533	7.50887e-39	1.06401e-35	0.00366779	0.00532586	0.491032	1
BMP10;Bone morphogenetic protein 10	BMP10	O95393	0.0941271	0.0068102	2.45418e-43	3.47757e-40	-0.0214953	0.00659934	0.00112624	1	0.00923981	0.00505327	0.0674858	1
BMP4;Bone morphogenetic protein 4	BMP4	P12644	-0.0357311	0.00721082	7.25866e-07	0.00102855	-0.0204594	0.00698755	0.00341387	1	-0.0228701	0.00535053	1.92185e-05	0.0272326
BMP6;Bone morphogenetic protein 6	BMP6	P22004	-0.016197	0.00722172	0.0249145	1	0.107622	0.00699812	3.38816e-53	4.80102e-50	-0.010919	0.00535863	0.0415918	1
BMPER;BMP-binding endothelial regulator protein	BMPER	Q8N8U9	-0.0661139	0.00701067	4.32282e-21	6.12544e-18	0.152318	0.0067936	1.46392e-110	2.07438e-107	-0.00423477	0.00520202	0.415614	1
BNIP2;BCL2/adenovirus E1B 19 kDa protein-interacting protein 2	BNIP2	Q12982	0.032315	0.007316	1.00361e-05	0.0142212	0.0301432	0.00708947	2.12577e-05	0.0301221	-0.010214	0.00542858	0.0599082	1
BNIP3L;BCL2/adenovirus E1B 19 kDa protein-interacting protein 3-like	BNIP3L	O60238	-0.0243667	0.00719801	0.000712025	1	0.11335	0.00697514	3.63557e-59	5.1516e-56	0.000382094	0.00534103	0.942969	1
BOC;Brother of CDO	BOC	Q9BWV1	0.0385933	0.00708984	5.26001e-08	7.45343e-05	-0.0455393	0.00687032	3.44197e-11	4.87727e-08	5.93889e-05	0.00526076	0.990993	1
BOLA1;BolA-like protein 1	BOLA1	Q9Y3E2	-0.00814862	0.00722388	0.259323	1	0.0996714	0.0070002	7.10029e-46	1.00611e-42	0.00144173	0.00536022	0.787956	1
BOLA2_BOLA2B;BolA-like protein 2	BOLA2	Q9H3K6	-0.000159254	0.0071735	0.982288	1	0.117269	0.00695139	1.33103e-63	1.88607e-60	-0.00455864	0.00532284	0.391766	1
BPIFA2;BPI fold-containing family A member 2	BPIFA2	Q96DR5	0.0211839	0.00696857	0.00236808	1	-0.0674531	0.0067528	1.83142e-23	2.59512e-20	0.0439773	0.00517078	1.88688e-17	2.67371e-14
BPIFB1;BPI fold-containing family B member 1	BPIFB1	Q8TDL5	0.0528853	0.00671198	3.388e-15	4.8008e-12	-0.164617	0.00650416	4.49256e-140	6.36596e-137	0.0318677	0.00498039	1.58745e-10	2.24942e-07
BPIFB2;BPI fold-containing family B member 2	BPIFB2	Q8N4F0	0.0611729	0.00652075	6.89417e-21	9.76904e-18	0.0414488	0.00631885	5.47128e-11	7.7528e-08	-0.0199382	0.00483849	3.7849e-05	0.0536321
BRAP;BRCA1-associated protein	BRAP	Q7Z569	0.016666	0.00725532	0.0216207	1	0.118802	0.00703067	8.35248e-64	1.18355e-60	-0.00318202	0.00538355	0.554481	1
BRD1;Bromodomain-containing protein 1	BRD1	O95696	-0.02956	0.00731239	5.30067e-05	0.0751104	-0.0222855	0.00708598	0.00166222	1	-0.00137689	0.00542591	0.799681	1
BRD2;Bromodomain-containing protein 2	BRD2	P25440	-0.00358322	0.00732583	0.624759	1	4.75006e-05	0.007099	0.994661	1	-0.00747246	0.00543587	0.169247	1
BRD3;Bromodomain-containing protein 3	BRD3	Q15059	0.000464907	0.00732537	0.949396	1	0.0252195	0.00709856	0.000381698	0.540866	0.0105546	0.00543553	0.0521716	1
BRDT;Bromodomain testis-specific protein	BRDT	Q58F21	0.0298932	0.00729775	4.20879e-05	0.0596385	0.0647245	0.0070718	5.8539e-20	8.29497e-17	0.0127934	0.00541504	0.0181541	1
BRK1;Protein BRICK1	BRK1	Q8WUW1	0.0476635	0.00720297	3.71299e-11	5.26131e-08	0.0283543	0.00697995	4.87056e-05	0.0690158	0.00768005	0.00534471	0.150743	1
BRME1;Break repair meiotic recombinase recruitment factor 1	BRME1	Q0VDD7	0.0103435	0.00732871	0.158144	1	-0.00762465	0.00710179	0.282999	1	-0.00453436	0.00543801	0.404384	1
BRSK2;Serine/threonine-protein kinase BRSK2	BRSK2	Q8IWQ3	0.0266199	0.00728194	0.000256946	0.364092	0.08041	0.00705647	4.986e-30	7.06516e-27	0.00423146	0.0054033	0.43356	1
BSG;Basigin	BSG	P35613	-0.0573496	0.00689979	9.76042e-17	1.38305e-13	0.0755497	0.00668616	1.48503e-29	2.10429e-26	-0.00282949	0.00511975	0.580498	1
BSND;Barttin	BSND	Q8WZ55	0.00566728	0.0073278	0.439294	1	0.00395668	0.00710091	0.577389	1	-0.0105933	0.00543734	0.0513921	1
BST1;ADP-ribosyl cyclase/cyclic ADP-ribose hydrolase 2	BST1	Q10588	0.00960891	0.00728852	0.187391	1	0.00433035	0.00706285	0.539803	1	-0.000495188	0.00540819	0.927046	1
BST2;Bone marrow stromal antigen 2	BST2	Q10589	-0.00206505	0.00706266	0.76999	1	0.0908705	0.00684398	3.90794e-40	5.53755e-37	-0.0159166	0.0052406	0.00238991	1
BTC;Probetacellulin	BTC	P35070	0.0323518	0.00722278	7.51801e-06	0.010653	0.0615304	0.00699914	1.54607e-18	2.19078e-15	0.00443895	0.00535941	0.407532	1
BTD;Biotinidase	BTD	P43251	0.0927734	0.00702318	9.60134e-40	1.36051e-36	0.127086	0.00680572	1.92617e-77	2.72939e-74	-0.00143681	0.0052113	0.782772	1
BTLA;B- and T-lymphocyte attenuator	BTLA	Q7Z6A9	-0.0115268	0.00732772	0.115719	1	0.0205265	0.00710084	0.00384605	1	-0.00252493	0.00543728	0.642383	1
BTN1A1;Butyrophilin subfamily 1 member A1	BTN1A1	Q13410	-0.00678836	0.0073231	0.353943	1	0.00166644	0.00709635	0.814341	1	0.00779089	0.00543385	0.151647	1
BTN2A1;Butyrophilin subfamily 2 member A1	BTN2A1	Q7KYR7	-0.0558745	0.00699123	1.36686e-15	1.93684e-12	0.063515	0.00677476	7.29905e-21	1.03427e-17	0.0125126	0.00518759	0.0158689	1
BTN3A2;Butyrophilin subfamily 3 member A2	BTN3A2	P78410	-0.047891	0.00710836	1.63862e-11	2.32192e-08	0.169383	0.00688827	2.11221e-132	2.993e-129	0.0175611	0.00527451	0.000871132	1
BTNL10;Butyrophilin-like protein 10	BTNL10P	A8MVZ5	-0.00402185	0.00732693	0.583068	1	0.0014939	0.00710007	0.833352	1	0.00487222	0.00543669	0.370166	1
C19orf12;Protein C19orf12	C19orf12	Q9NSK7	0.0242738	0.00689125	0.000428195	0.606752	0.0929291	0.00667788	6.62211e-44	9.38352e-41	-0.0287046	0.00511341	1.99659e-08	2.82916e-05
C1GALT1C1;C1GALT1-specific chaperone 1	C1GALT1C1	Q96EU7	0.0181629	0.00731205	0.0129976	1	0.0169678	0.00708565	0.0166405	1	0.00977933	0.00542565	0.071487	1
C1QA;Complement C1q subcomponent subunit A	C1QA	P02745	-0.107118	0.00715478	1.61128e-50	2.28319e-47	-0.0136885	0.00693325	0.0483529	1	0.00519307	0.00530895	0.327996	1
C1QBP;Complement component 1 Q subcomponent-binding protein, mitochondrial	C1QBP	Q07021	0.00579783	0.00732379	0.428574	1	0.0110397	0.00709702	0.119826	1	-0.0084265	0.00543436	0.121007	1
C1QL2;Complement C1q-like protein 2	C1QL2	Q7Z5L3	0.0657066	0.00701208	7.6347e-21	1.08184e-17	0.0167906	0.00679497	0.0134772	1	-0.0022377	0.00520307	0.667145	1
C1QTNF1;Complement C1q tumor necrosis factor-related protein 1	C1QTNF1	Q9BXJ1	-0.0456138	0.00695913	5.65835e-11	8.01788e-08	0.112122	0.00674365	7.72757e-62	1.095e-58	0.0125302	0.00516377	0.0152477	1
C1QTNF5;Complement C1q tumor necrosis factor-related protein 5	C1QTNF5	Q9BXJ0	-0.0468749	0.00722748	8.95211e-11	1.26851e-07	0.0553187	0.0070037	2.9041e-15	4.11511e-12	0.0141975	0.0053629	0.00811586	1
C1QTNF6;Complement C1q tumor necrosis factor-related protein 6	C1QTNF6	Q9BXI9	-0.023426	0.0073073	0.00134789	1	0.0213596	0.00708104	0.00255941	1	-0.00762573	0.00542212	0.159611	1
C1QTNF9;Complement C1q and tumor necrosis factor-related protein 9A	C1QTNF9	P0C862	0.0391093	0.00727857	7.78387e-08	0.000110298	-0.0212311	0.00705321	0.00261316	1	0.00630833	0.00540081	0.242801	1
C1R;Complement C1r subcomponent	C1R	P00736	0.0657992	0.00716028	4.15667e-20	5.89e-17	0.068154	0.00693857	9.63646e-23	1.36549e-19	0.00889194	0.00531303	0.0942164	1
C1RL;Complement C1r subcomponent-like protein	C1RL	Q9NZP8	-0.0108911	0.00692923	0.116016	1	0.0719838	0.00671468	8.9838e-27	1.273e-23	0.0305902	0.00514159	2.71395e-09	3.84567e-06
C1S;Complement C1s subcomponent	C1S	P09871	0.0754629	0.00699765	4.51404e-27	6.3964e-24	0.0979605	0.00678099	3.6061e-47	5.10984e-44	0.0167914	0.00519236	0.00122238	1
C2;Complement C2	C2	P06681	0.0504449	0.00698948	5.41182e-13	7.66855e-10	0.0779524	0.00677307	1.34542e-30	1.90646e-27	0.0185475	0.0051863	0.000349034	0.494581
C2CD2L;Phospholipid transfer protein C2CD2L	C2CD2L	O14523	-0.00377261	0.00730117	0.60536	1	0.0621652	0.00707511	1.61158e-18	2.28361e-15	0.00455405	0.00541758	0.400575	1
C2orf69;UPF0565 protein C2orf69	C2orf69	Q8N8R5	0.0057161	0.00730494	0.433927	1	0.0600622	0.00707876	2.24285e-17	3.17812e-14	-0.00173284	0.00542037	0.749205	1
C3;Complement C3	C3	P01024	0.0284391	0.00689517	3.72391e-05	0.0527678	0.10631	0.00668168	8.43722e-57	1.19555e-53	0.0106445	0.00511632	0.0374878	1
C4BPB;C4b-binding protein beta chain	C4BPB	P20851	0.119912	0.00696819	4.27031e-66	6.05102e-63	0.059346	0.00675243	1.57805e-18	2.2361e-15	0.0694674	0.0051705	4.73661e-41	6.71177e-38
C5;Complement C5	C5	P01031	0.0650967	0.00718608	1.38582e-19	1.96371e-16	0.0445195	0.00696358	1.64477e-10	2.33064e-07	-0.00273856	0.00533218	0.607541	1
C7;Complement component C7	C7	P10643	-0.0409976	0.0070227	5.33346e-09	7.55751e-06	-0.0381224	0.00680526	2.13591e-08	3.02658e-05	0.00113808	0.00521095	0.827117	1
C7orf50;Uncharacterized protein C7orf50	C7orf50	Q9BRJ6	-0.00774654	0.00725281	0.285494	1	0.11293	0.00702824	6.86807e-58	9.73205e-55	0.00655773	0.00538169	0.223032	1
C8B;Complement component C8 beta chain	C8B	P07358	0.117492	0.00710916	3.99101e-61	5.65527e-58	-0.00847727	0.00688904	0.218501	1	0.0149413	0.0052751	0.00462238	1
C9;Complement component C9	C9	P02748	0.145382	0.00682805	5.77134e-100	8.17799e-97	-0.377058	0.00661663	0	0	-0.0110939	0.00506651	0.0285565	1
C9orf40;Uncharacterized protein C9orf40	C9orf40	Q8IXQ3	-0.0184732	0.00727873	0.0111539	1	0.0644495	0.00705336	6.72767e-20	9.5331e-17	-0.00849082	0.00540092	0.115935	1
CA1;Carbonic anhydrase 1	CA1	P00915	-0.0154789	0.00713359	0.0300241	1	0.0885228	0.00691271	1.84461e-37	2.61381e-34	-0.00174196	0.00529323	0.742089	1
CA11;Carbonic anhydrase-related protein 11	CA11	O75493	0.000866852	0.00731294	0.905643	1	0.00633454	0.00708651	0.371388	1	-0.00224412	0.00542631	0.679197	1
CA12;Carbonic anhydrase 12	CA12	O43570	-0.0582239	0.00724817	9.81245e-16	1.39042e-12	-0.0298866	0.00702375	2.09513e-05	0.029688	0.00100916	0.00537825	0.851163	1
CA13;Carbonic anhydrase 13	CA13	Q8N1Q1	0.0440018	0.00729232	1.6155e-09	2.28916e-06	0.0611726	0.00706653	5.05971e-18	7.16961e-15	-0.00120453	0.00541101	0.823843	1
CA14;Carbonic anhydrase 14	CA14	Q9ULX7	0.164543	0.00647686	4.1714e-141	5.91087e-138	-0.119609	0.00627632	1.45721e-80	2.06487e-77	-0.00847719	0.00480593	0.0777568	1
CA2;Carbonic anhydrase 2	CA2	P00918	-0.0226058	0.00712629	0.00151431	1	0.104278	0.00690564	2.32802e-51	3.29881e-48	-0.00168772	0.00528781	0.749598	1
CA3;Carbonic anhydrase 3	CA3	P07451	-0.0131847	0.00708573	0.0627899	1	0.0484202	0.00686634	1.79838e-12	2.5483e-09	0.00280007	0.00525772	0.594339	1
CA4;Carbonic anhydrase 4	CA4	P22748	0.00120484	0.00706668	0.864621	1	-0.0354629	0.00684788	2.24698e-07	0.000318397	0.0229989	0.00524358	1.1573e-05	0.016399
CA5A;Carbonic anhydrase 5A, mitochondrial	CA5A	P35218	-0.04916	0.00676916	3.88306e-13	5.5023e-10	0.155093	0.00655957	1.2378e-122	1.75396e-119	-0.0108101	0.00502282	0.0313886	1
CA6;Carbonic anhydrase 6	CA6	P23280	0.0954057	0.00671018	9.47577e-46	1.34272e-42	-0.0981995	0.00650241	2.27509e-51	3.2238e-48	0.00762685	0.00497905	0.125584	1
CA7;Carbonic anhydrase 7	CA7	P43166	-0.01327	0.00731379	0.0696267	1	-0.033395	0.00708734	2.46331e-06	0.0034905	0.00233345	0.00542694	0.667216	1
CA8;Carbonic anhydrase-related protein	CA8	P35219	0.00259625	0.00732388	0.722973	1	-0.00170956	0.00709711	0.809649	1	-0.0142182	0.00543443	0.00889213	1
CA9;Carbonic anhydrase 9	CA9	Q16790	-0.0683984	0.00702561	2.2687e-22	3.21474e-19	0.00388051	0.00680808	0.568691	1	-0.000721161	0.00521311	0.889976	1
CABP2;Calcium-binding protein 2	CABP2	Q9NPB3	0.00886151	0.00731375	0.225665	1	0.0332769	0.0070873	2.6724e-06	0.00378679	-0.00631555	0.00542691	0.244535	1
CACNA1C;Voltage-dependent L-type calcium channel subunit alpha-1C	CACNA1C	Q13936	0.00807547	0.00732699	0.270402	1	-0.00869864	0.00710012	0.220531	1	-0.00438879	0.00543673	0.419529	1
CACNA1H;Voltage-dependent T-type calcium channel subunit alpha-1H	CACNA1H	O95180	0.00665974	0.00732418	0.363207	1	-0.0205642	0.0070974	0.00376463	1	0.00273677	0.00543465	0.61456	1
CACNB1;Voltage-dependent L-type calcium channel subunit beta-1	CACNB1	Q02641	-0.0120795	0.0073267	0.0992183	1	-0.00234045	0.00709984	0.741667	1	0.00259881	0.00543652	0.632633	1
CACNB3;Voltage-dependent L-type calcium channel subunit beta-3	CACNB3	P54284	0.0249305	0.00718229	0.00051895	0.735352	0.156811	0.00695991	1.28125e-111	1.81553e-108	0.0117299	0.00532937	0.0277431	1
CACYBP;Calcyclin-binding protein	CACYBP	Q9HB71	0.0240922	0.00725827	0.000903434	1	0.0990362	0.00703354	6.62028e-45	9.38093e-42	-0.00037836	0.00538575	0.943993	1
CADPS;Calcium-dependent secretion activator 1	CADPS	Q9ULU8	0.00307149	0.00732789	0.675109	1	-0.0142734	0.007101	0.0444334	1	-0.00278731	0.00543741	0.608223	1
CALB1;Calbindin	CALB1	P05937	0.0263169	0.00705396	0.000191177	0.270898	0.0118209	0.00683555	0.0837597	1	0.00318009	0.00523415	0.543479	1
CALB2;Calretinin	CALB2	P22676	0.0159005	0.00669533	0.0175607	1	0.0715004	0.00648803	3.38923e-28	4.80254e-25	-0.00022047	0.00496804	0.964604	1
CALCA;Calcitonin	CALCA	P01258	-0.0351983	0.00591609	2.71352e-09	3.84506e-06	0.0981788	0.00573291	1.76499e-65	2.501e-62	0.00393461	0.00438983	0.370098	1
CALCB;Calcitonin gene-related peptide 2	CALCB	P10092	0.025749	0.00723504	0.000372857	0.528338	0.0152282	0.00701102	0.0298596	1	0.00303168	0.00536851	0.57227	1
CALCOCO1;Calcium-binding and coiled-coil domain-containing protein 1	CALCOCO1	Q9P1Z2	0.0279732	0.00726431	0.000117954	0.167141	0.101411	0.00703939	6.42606e-47	9.10573e-44	-0.000278178	0.00539023	0.958841	1
CALCOCO2;Calcium-binding and coiled-coil domain-containing protein 2	CALCOCO2	Q13137	-0.0109358	0.00726154	0.132077	1	0.109463	0.0070367	2.1964e-54	3.1123e-51	0.00425686	0.00538817	0.42951	1
CALY;Neuron-specific vesicular protein calcyon	CALY	Q9NYX4	0.0145128	0.00732493	0.0475665	1	-0.00668143	0.00709813	0.34656	1	0.00120727	0.00543521	0.824222	1
CAMKK1;Calcium/calmodulin-dependent protein kinase kinase 1	CAMKK1	Q8N5S9	0.000194713	0.00724583	0.978562	1	0.121093	0.00702148	2.24355e-66	3.17911e-63	-0.00246898	0.00537652	0.646082	1
CAMLG;Guided entry of tail-anchored proteins factor CAMLG	CAMLG	P49069	0.0156605	0.00730663	0.0320941	1	0.0460799	0.0070804	7.71277e-11	1.0929e-07	0.00497991	0.00542163	0.358349	1
CAMSAP1;Calmodulin-regulated spectrin-associated protein 1	CAMSAP1	Q5T5Y3	0.0334392	0.00725638	4.0749e-06	0.00577414	0.104861	0.0070317	3.88189e-50	5.50064e-47	0.00382246	0.00538434	0.477757	1
CANT1;Soluble calcium-activated nucleotidase 1	CANT1	Q8WVQ1	0.00321564	0.00698216	0.645123	1	0.16392	0.00676597	1.29983e-128	1.84185e-125	0.00992977	0.00518086	0.0552937	1
CAPG;Macrophage-capping protein	CAPG	P40121	0.00198059	0.00705894	0.779035	1	0.0646106	0.00684037	3.74772e-21	5.31051e-18	-0.00643934	0.00523784	0.218934	1
CAPN3;Calpain-3	CAPN3	P20807	0.0108881	0.00729871	0.135764	1	-0.00106128	0.00707272	0.880724	1	-0.00201872	0.00541575	0.709337	1
CAPS;Calcyphosin	CAPS	Q13938	0.0126936	0.00721521	0.0785386	1	0.0184497	0.00699181	0.00832459	1	-0.00618233	0.0053538	0.248198	1
CARHSP1;Calcium-regulated heat-stable protein 1	CARHSP1	Q9Y2V2	-0.0213178	0.00718316	0.00300188	1	0.113824	0.00696075	6.96291e-60	9.86645e-57	0.00591473	0.00533001	0.267135	1
CASC3;Protein CASC3	CASC3	O15234	-0.00286768	0.00720473	0.690613	1	0.149043	0.00698165	1.77229e-100	2.51133e-97	0.0109555	0.00534602	0.0404418	1
CASP1;Caspase-1	CASP1	P29466	-0.0229779	0.00727324	0.00158318	1	0.0719893	0.00704804	1.85498e-24	2.6285e-21	0.00711258	0.00539685	0.187542	1
CASP10;Caspase-10	CASP10	Q92851	-0.0098105	0.0072409	0.175467	1	0.129267	0.0070167	1.95122e-75	2.76488e-72	0.00245541	0.00537286	0.647672	1
CASP2;Caspase-2	CASP2	P42575	0.0278983	0.00727347	0.000125464	0.177782	0.0752928	0.00704826	1.35051e-26	1.91367e-23	-0.00610068	0.00539702	0.258324	1
CASP3;Caspase-3	CASP3	P42574	0.0247872	0.00728849	0.000672465	0.952883	0.0778795	0.00706282	3.16036e-28	4.47823e-25	-0.00412043	0.00540817	0.446131	1
CASP4;Caspase-4	CASP4	P49662	-0.0131129	0.0073215	0.0732999	1	0.00516763	0.00709481	0.466393	1	-0.00126989	0.00543266	0.81518	1
CASP7;Caspase-7	CASP7	P55210	0.0249091	0.00726688	0.000609283	0.863355	0.0972017	0.00704188	3.15126e-43	4.46534e-40	0.000169716	0.00539213	0.974891	1
CASP8;Caspase-8	CASP8	Q14790	0.0178211	0.00724198	0.0138676	1	0.0716742	0.00701775	1.87065e-24	2.65071e-21	-0.00980227	0.00537366	0.0681404	1
CASP9;Caspase-9	CASP9	P55211	0.00305073	0.00730373	0.676173	1	0.0708711	0.00707758	1.43022e-23	2.02662e-20	-0.00755409	0.00541947	0.163363	1
CASQ2;Calsequestrin-2	CASQ2	O14958	-0.0112315	0.00732643	0.125283	1	0.015472	0.00709958	0.0293174	1	0.000890405	0.00543632	0.869899	1
CAT;Catalase	CAT	P04040	-0.0155853	0.00710358	0.0282411	1	0.09961	0.00688363	2.54176e-47	3.60168e-44	-0.00519633	0.00527096	0.324218	1
CBLIF;Cobalamin binding intrinsic factor	CBLIF	P27352	-0.00792604	0.00714481	0.26729	1	0.0748282	0.00692359	3.49054e-27	4.9461e-24	-0.00582434	0.00530156	0.271946	1
CBLN1;Cerebellin-1	CBLN1	P23435	0.00358057	0.00731978	0.624729	1	-0.00992931	0.00709313	0.161568	1	-0.00850619	0.00543138	0.11733	1
CBLN4;Cerebellin-4	CBLN4	Q9NTU7	0.0786972	0.00720073	9.27688e-28	1.31453e-24	0.0380204	0.00697778	5.10549e-08	7.23448e-05	-0.02078	0.00534305	0.000100777	0.142801
CBS;Cystathionine beta-synthase	CBS	P35520	-0.0320908	0.00709883	6.18743e-06	0.00876759	0.0934039	0.00687903	6.8892e-42	9.76199e-39	-0.0202948	0.00526744	0.000116945	0.165711
CBX2;Chromobox protein homolog 2	CBX2	Q14781	-0.0163676	0.0073231	0.0254196	1	0.00960889	0.00709636	0.175726	1	-0.00530663	0.00543385	0.32878	1
CC2D1A;Coiled-coil and C2 domain-containing protein 1A	CC2D1A	Q6P1N0	0.00276011	0.0070981	0.697388	1	0.209222	0.00687832	1.2727e-200	1.80342e-197	0.0107214	0.00526689	0.0417962	1
CCAR2;Cell cycle and apoptosis regulator protein 2	CCAR2	Q8N163	-0.0153456	0.00732273	0.0361231	1	0.0242976	0.00709599	0.000617485	0.874977	-0.00760159	0.00543357	0.161821	1
CCDC134;Coiled-coil domain-containing protein 134	CCDC134	Q9H6E4	-0.00566442	0.00728107	0.436594	1	0.101592	0.00705563	7.15885e-47	1.01441e-43	0.00434246	0.00540266	0.421539	1
CCDC28A;Coiled-coil domain-containing protein 28A	CCDC28A	Q8IWP9	0.0138931	0.0073276	0.0579689	1	0.0145863	0.00710072	0.0399639	1	0.000391271	0.00543719	0.942633	1
CCDC50;Coiled-coil domain-containing protein 50	CCDC50	Q8IVM0	-0.0228519	0.007318	0.00179345	1	0.0113673	0.00709142	0.108952	1	0.000332926	0.00543007	0.951111	1
CCDC80;Coiled-coil domain-containing protein 80	CCDC80	Q76M96	0.00383048	0.00647249	0.553982	1	0.0972309	0.00627208	5.05953e-54	7.16935e-51	0.0158071	0.00480268	0.000998237	1
CCER2;Coiled-coil domain-containing glutamate-rich protein 2	CCER2	I3L3R5	-0.0324742	0.00717554	6.03975e-06	0.00855832	0.0538993	0.00695336	9.32156e-15	1.32087e-11	0.00916994	0.00532435	0.0850304	1
CCL11;Eotaxin	CCL11	P51671	-0.0201147	0.00678994	0.00305432	1	0.156616	0.0065797	2.98337e-124	4.22743e-121	0.00406428	0.00503824	0.419852	1
CCL13;C-C motif chemokine 13	CCL13	Q99616	0.018434	0.00707259	0.00915368	1	0.150212	0.0068536	9.08309e-106	1.28707e-102	0.00585567	0.00524797	0.264517	1
CCL14;C-C motif chemokine 14	CCL14	Q16627	-0.0377746	0.00710545	1.06553e-07	0.000150986	0.101951	0.00688544	1.86458e-49	2.64211e-46	0.00915839	0.00527235	0.0823853	1
CCL15;C-C motif chemokine 15	CCL15	Q16663	-0.0971483	0.00703038	2.56227e-43	3.63073e-40	0.126447	0.0068127	1.55567e-76	2.20439e-73	0.00994187	0.00521664	0.0566844	1
CCL16;C-C motif chemokine 16	CCL16	O15467	-0.0519367	0.00663606	5.15816e-15	7.30911e-12	0.21147	0.00643059	1.23514e-233	1.75019e-230	0.034756	0.00492405	1.71519e-12	2.43043e-09
CCL17;C-C motif chemokine 17	CCL17	Q92583	0.0555189	0.00704122	3.23971e-15	4.59067e-12	0.162437	0.00682321	2.73911e-124	3.88132e-121	0.0265674	0.00522469	3.69555e-07	0.000523659
CCL18;C-C motif chemokine 18	CCL18	P55774	0.023118	0.00692784	0.000847822	1	0.104062	0.00671333	5.1621e-54	7.31469e-51	0.0143561	0.00514056	0.00522953	1
CCL19;C-C motif chemokine 19	CCL19	Q99731	-0.0149826	0.00716984	0.0366543	1	0.0949577	0.00694784	2.0444e-42	2.89692e-39	0.00567442	0.00532012	0.286162	1
CCL2;C-C motif chemokine 2	CCL2	P13500	-0.0179599	0.00713842	0.0118755	1	0.100809	0.00691739	5.72636e-48	8.11425e-45	-0.0212866	0.00529681	5.8629e-05	0.0830773
CCL20;C-C motif chemokine 20	CCL20	P78556	-0.0040638	0.00705039	0.564353	1	0.0874181	0.00683209	2.11224e-37	2.99304e-34	0.0195723	0.0052315	0.000183402	0.259881
CCL21;C-C motif chemokine 21	CCL21	O00585	-0.0662416	0.00712565	1.53611e-20	2.17667e-17	0.0923188	0.00690502	1.14052e-40	1.61612e-37	0.0131038	0.00528733	0.0132041	1
CCL22;C-C motif chemokine 22	CCL22	O00626	0.049547	0.00677779	2.72413e-13	3.86009e-10	0.167896	0.00656793	7.90004e-143	1.11944e-139	0.0347339	0.00502922	5.05498e-12	7.16291e-09
CCL23;C-C motif chemokine 23	CCL23	P55773	-0.00617206	0.00665272	0.353544	1	0.272462	0.00644673	0	0	0.0449852	0.00493642	8.42962e-20	1.19448e-16
CCL24;C-C motif chemokine 24	CCL24	O00175	0.0478113	0.00710886	1.77539e-11	2.51572e-08	0.084375	0.00688875	2.01746e-34	2.85875e-31	0.0172911	0.00527488	0.00104643	1
CCL25;C-C motif chemokine 25	CCL25	O15444	-0.0243801	0.00705143	0.00054592	0.773568	0.112725	0.0068331	6.53611e-61	9.26167e-58	0.00630418	0.00523227	0.228263	1
CCL26;C-C motif chemokine 26	CCL26	Q9Y258	0.0392438	0.00716121	4.28124e-08	6.06652e-05	0.0958676	0.00693948	2.69131e-43	3.81358e-40	-0.00322935	0.00531373	0.543365	1
CCL27;C-C motif chemokine 27	CCL27	Q9Y4X3	-0.0119703	0.00645093	0.0635195	1	0.355827	0.00625119	0	0	0.0738177	0.00478669	1.75612e-53	2.48843e-50
CCL28;C-C motif chemokine 28	CCL28	Q9NRJ3	-0.000404116	0.00712862	0.954793	1	0.0328712	0.0069079	1.95817e-06	0.00277473	0.00960091	0.00528955	0.0695213	1
CCL3;C-C motif chemokine 3	CCL3	P10147	-0.0210126	0.00692777	0.00242229	1	0.111926	0.00671327	3.60613e-62	5.10988e-59	-0.000618126	0.00514051	0.904289	1
CCL4;C-C motif chemokine 4	CCL4	P13236	-0.00975286	0.00714284	0.172135	1	0.127548	0.00692168	1.79462e-75	2.54298e-72	-0.00340578	0.00530009	0.520495	1
CCL5;C-C motif chemokine 5	CCL5	P13501	0.0156218	0.0071222	0.0282857	1	0.163049	0.00690168	1.93485e-122	2.74169e-119	0.0142327	0.00528478	0.00708129	1
CCL7;C-C motif chemokine 7	CCL7	P80098	-0.0130762	0.00680467	0.0546582	1	0.128695	0.00659398	2.19667e-84	3.11268e-81	0.0139747	0.00504917	0.00564799	1
CCL8;C-C motif chemokine 8	CCL8	P80075	0.00813618	0.00714483	0.254815	1	0.119362	0.00692361	2.49748e-66	3.53894e-63	0.0147462	0.00530157	0.00541416	1
CCN1;CCN family member 1	CCN1	O00622	-0.00863376	0.00651392	0.185036	1	0.387642	0.00631223	0	0	0.0674679	0.00483342	3.65583e-44	5.18031e-41
CCN2;CCN family member 2	CCN2	P29279	0.0171707	0.00715942	0.0164749	1	0.165256	0.00693775	2.00727e-124	2.8443e-121	0.00356116	0.0053124	0.50264	1
CCN3;CCN family member 3	CCN3	P48745	0.00877944	0.00663505	0.18578	1	0.0323425	0.00642961	4.92256e-07	0.000697527	0.00292912	0.0049233	0.55188	1
CCN4;CCN family member 4	CCN4	O95388	-0.0212413	0.00706765	0.00265402	1	0.0969501	0.00684882	2.29238e-45	3.2483e-42	0.00109417	0.0052443	0.83473	1
CCN5;CCN family member 5	CCN5	O76076	-0.0308892	0.00638895	1.33852e-06	0.00189669	0.0849719	0.00619113	9.29554e-43	1.31718e-39	0.0320753	0.0047407	1.34515e-11	1.90608e-08
CCND2;G1/S-specific cyclin-D2	CCND2	P30279	0.00977378	0.00729819	0.180512	1	0.0125285	0.00707222	0.0764848	1	-0.00014555	0.00541537	0.978558	1
CCNE1;G1/S-specific cyclin-E1	CCNE1	P24864	0.00795748	0.00731198	0.276479	1	-4.40057e-05	0.00708558	0.995045	1	0.000724747	0.0054256	0.893736	1
CCS;Copper chaperone for superoxide dismutase	CCS	O14618	0.0310914	0.00716229	1.42239e-05	0.0201553	0.0865705	0.00694053	1.24337e-35	1.76186e-32	-0.01042	0.00531453	0.0499264	1
CCT5;T-complex protein 1 subunit epsilon	CCT5	P48643	-0.00985743	0.00727521	0.175447	1	0.115886	0.00704995	1.72021e-60	2.43753e-57	0.00149802	0.00539831	0.7814	1
CD101;Immunoglobulin superfamily member 2	CD101	Q93033	0.0164978	0.00715545	0.0211373	1	0.063729	0.0069339	4.10155e-20	5.8119e-17	0.000940941	0.00530945	0.859337	1
CD109;CD109 antigen	CD109	Q6YHK3	0.00232972	0.00716129	0.74494	1	-0.0214079	0.00693955	0.00203767	1	0.00212554	0.00531378	0.689155	1
CD14;Monocyte differentiation antigen CD14	CD14	P08571	-0.0153888	0.0069919	0.0277464	1	0.0896526	0.00677541	7.13457e-40	1.01097e-36	0.0527349	0.0051881	3.08129e-24	4.36618e-21
CD160;CD160 antigen	CD160	O95971	-0.0887532	0.00713184	1.77587e-35	2.51641e-32	0.0516053	0.00691102	8.38692e-14	1.18843e-10	0.000959612	0.00529193	0.856106	1
CD163;Scavenger receptor cysteine-rich type 1 protein M130	CD163	Q86VB7	-0.0514942	0.00687536	7.0653e-14	1.00115e-10	0.0806077	0.00666247	1.25016e-33	1.77147e-30	0.0126425	0.00510162	0.0132119	1
CD164;Sialomucin core protein 24	CD164	Q04900	0.00431717	0.00719963	0.548751	1	0.109964	0.00697671	8.87573e-56	1.25769e-52	-0.00986762	0.00534223	0.0647413	1
CD164L2;CD164 sialomucin-like 2 protein	CD164L2	Q6UWJ8	0.0110512	0.00732657	0.131469	1	-0.00127619	0.00709971	0.857348	1	-0.00964315	0.00543642	0.0761039	1
CD177;CD177 antigen	CD177	Q8N6Q3	-0.0296429	0.00729889	4.89069e-05	0.0693011	0.00509209	0.0070729	0.471564	1	0.00591523	0.00541588	0.274752	1
CD1C;T-cell surface glycoprotein CD1c	CD1C	P29017	0.0582306	0.00704047	1.37642e-16	1.95038e-13	0.0530331	0.00682248	7.85412e-15	1.11293e-11	-0.000669298	0.00522413	0.898057	1
CD2;T-cell surface antigen CD2	CD2	P06729	-0.020393	0.00730978	0.00527642	1	0.0223323	0.00708345	0.00161876	1	-0.00525403	0.00542397	0.332717	1
CD200;OX-2 membrane glycoprotein	CD200	P41217	0.0522994	0.00699938	8.08137e-14	1.14513e-10	-0.0436255	0.00678266	1.27613e-10	1.80828e-07	0.00502045	0.00519364	0.333724	1
CD200R1;Cell surface glycoprotein CD200 receptor 1	CD200R1	Q8TD46	-0.0387685	0.00724761	8.89187e-08	0.000125998	0.0682122	0.0070232	2.84692e-22	4.03408e-19	-0.00406025	0.00537783	0.450256	1
CD207;C-type lectin domain family 4 member K	CD207	Q9UJ71	0.0118534	0.00709882	0.0949743	1	0.113967	0.00687902	2.05023e-61	2.90518e-58	0.0103451	0.00526743	0.0495416	1
CD209;CD209 antigen	CD209	Q9NNX6	0.1441	0.00721522	2.99679e-88	4.24645e-85	-0.0880347	0.00699182	2.82926e-36	4.00907e-33	-0.0150435	0.0053538	0.00495895	1
CD22;B-cell receptor CD22	CD22	P20273	0.0227856	0.00683304	0.000855019	1	0.0941489	0.00662147	9.38378e-46	1.32968e-42	-0.00732871	0.00507021	0.148342	1
CD226;CD226 antigen	CD226	Q15762	0.014314	0.00725272	0.048434	1	0.120756	0.00702815	6.75017e-66	9.565e-63	-0.0108906	0.00538162	0.0430121	1
CD244;Natural killer cell receptor 2B4	CD244	Q9BZW8	-0.0277618	0.00719167	0.000113465	0.16078	0.109808	0.00696899	9.58039e-56	1.35754e-52	-0.00411946	0.00533632	0.440139	1
CD248;Endosialin	CD248	Q9HCU0	0.0793626	0.00691118	1.81484e-30	2.57163e-27	-0.0687163	0.00669719	1.15014e-24	1.62975e-21	0.00322713	0.0051282	0.529162	1
CD27;CD27 antigen	CD27	P26842	-0.145643	0.00701227	3.02992e-95	4.2934e-92	0.0552915	0.00679515	4.18672e-16	5.93258e-13	0.0196007	0.00520321	0.000165459	0.234455
CD274;Programmed cell death 1 ligand 1	CD274	Q9NZQ7	-0.0455911	0.0070795	1.21107e-10	1.71608e-07	0.101256	0.0068603	3.73701e-49	5.29535e-46	0.0136059	0.00525309	0.00959932	1
CD276;CD276 antigen	CD276	Q5ZPR3	-0.048375	0.00706201	7.50449e-12	1.06339e-08	-0.0215086	0.00684335	0.00167371	1	0.00645513	0.00524012	0.218007	1
CD28;T-cell-specific surface glycoprotein CD28	CD28	P10747	-0.0553671	0.00710113	6.51614e-15	9.23337e-12	0.0818498	0.00688126	1.4575e-32	2.06528e-29	-0.00657496	0.00526914	0.212104	1
CD2AP;CD2-associated protein	CD2AP	Q9Y5K6	-0.0381525	0.00714229	9.26103e-08	0.000131229	0.198003	0.00692115	5.74054e-178	8.13435e-175	0.0151277	0.00529969	0.00431373	1
CD300A;CMRF35-like molecule 8	CD300A	Q9UGN4	-0.0854328	0.00700836	4.11031e-34	5.82431e-31	0.0954608	0.00679137	9.32425e-45	1.32125e-41	0.00466538	0.00520031	0.369654	1
CD300C;CMRF35-like molecule 6	CD300C	Q08708	-0.0828814	0.00695277	1.06804e-32	1.51341e-29	0.0814028	0.00673749	1.53069e-33	2.16898e-30	0.00277967	0.00515906	0.590032	1
CD300E;CMRF35-like molecule 2	CD300E	Q496F6	-0.0548489	0.00667728	2.20672e-16	3.12693e-13	0.0809845	0.00647053	7.28503e-36	1.03229e-32	0.031451	0.00495464	2.21084e-10	3.13276e-07
CD300LF;CMRF35-like molecule 1	CD300LF	Q8TDQ1	-0.0186755	0.00687454	0.0065984	1	0.0691046	0.00666168	3.56025e-25	5.04487e-22	0.00510978	0.00510101	0.316486	1
CD300LG;CMRF35-like molecule 9	CD300LG	Q6UXG3	0.0584177	0.00686168	1.75159e-17	2.482e-14	-0.170819	0.00664922	3.21898e-144	4.5613e-141	0.0091552	0.00509146	0.0721623	1
CD302;CD302 antigen	CD302	Q8IX05	-0.0345395	0.00671467	2.70544e-07	0.000383361	0.0892425	0.00650677	1.05813e-42	1.49938e-39	0.00984869	0.00498239	0.048083	1
CD33;Myeloid cell surface antigen CD33	CD33	P20138	-0.0160465	0.00727118	0.02733	1	0.0276739	0.00704604	8.59687e-05	0.121818	0.00882919	0.00539532	0.101754	1
CD34;Hematopoietic progenitor cell antigen CD34	CD34	P28906	0.102588	0.00718252	3.75757e-46	5.32448e-43	-0.014566	0.00696012	0.0363759	1	0.00701914	0.00532953	0.187838	1
CD36;Platelet glycoprotein 4	CD36	P16671	0.0302715	0.00707199	1.8699e-05	0.0264965	0.128561	0.00685302	3.87201e-78	5.48664e-75	-0.00248863	0.00524752	0.635326	1
CD38;ADP-ribosyl cyclase/cyclic ADP-ribose hydrolase 1	CD38	P28907	-0.0420112	0.00585334	7.2497e-13	1.02728e-09	0.181861	0.0056721	2.32954e-222	3.30096e-219	0.00849806	0.00434326	0.0504016	1
CD3D;T-cell surface glycoprotein CD3 delta chain	CD3D	P04234	0.0107862	0.00732594	0.140942	1	-0.0292245	0.00709911	3.8531e-05	0.0545984	-0.000214353	0.00543596	0.968546	1
CD3E;T-cell surface glycoprotein CD3 epsilon chain	CD3E	P07766	0.0115483	0.0073283	0.115068	1	0.00486964	0.00710139	0.492888	1	-0.000486395	0.00543771	0.928726	1
CD3G;T-cell surface glycoprotein CD3 gamma chain	CD3G	P09693	-0.000490185	0.0073278	0.946667	1	0.00767512	0.00710091	0.279765	1	0.00511509	0.00543733	0.346847	1
CD4;T-cell surface glycoprotein CD4	CD4	P01730	-0.0829189	0.00677208	2.11897e-34	3.00259e-31	0.306334	0.0065624	0	0	0.0412618	0.00502499	2.26112e-16	3.20401e-13
CD40;Tumor necrosis factor receptor superfamily member 5	CD40	P25942	-0.00818206	0.00715479	0.252807	1	0.138188	0.00693326	6.66681e-88	9.44687e-85	0.0185093	0.00530896	0.000490108	0.694483
CD40LG;CD40 ligand	CD40LG	P29965	0.0194293	0.00726013	0.00745064	1	0.0973015	0.00703534	2.16991e-43	3.07476e-40	-0.00587532	0.00538713	0.275447	1
CD46;Membrane cofactor protein	CD46	P15529	-0.00685126	0.00710809	0.335118	1	0.0786078	0.006888	4.10089e-30	5.81096e-27	0.0184766	0.00527431	0.000460396	0.652381
CD48;CD48 antigen	CD48	P09326	-0.103033	0.00718458	1.64535e-46	2.33146e-43	0.0774563	0.00696213	1.05393e-28	1.49341e-25	0.00203397	0.00533107	0.702811	1
CD5;T-cell surface glycoprotein CD5	CD5	P06127	-0.0915567	0.00692547	8.33529e-40	1.18111e-36	0.159475	0.00671104	7.60814e-124	1.07807e-120	0.00770349	0.0051388	0.133861	1
CD55;Complement decay-accelerating factor	CD55	P08174	-0.00874981	0.00706909	0.215815	1	0.0373365	0.00685021	5.05892e-08	7.16849e-05	0.00733061	0.00524537	0.16226	1
CD58;Lymphocyte function-associated antigen 3	CD58	P19256	0.01276	0.00720768	0.076681	1	-0.0120469	0.00698451	0.0845704	1	-0.00102421	0.0053482	0.848131	1
CD59;CD59 glycoprotein	CD59	P13987	-0.0106209	0.00649341	0.101923	1	0.0689486	0.00629236	6.78401e-28	9.61294e-25	0.012237	0.00481821	0.0110974	1
CD5L;CD5 antigen-like	CD5L	O43866	-0.0509613	0.00722866	1.82344e-12	2.58382e-09	0.0649607	0.00700484	1.89734e-20	2.68854e-17	-0.0036829	0.00536377	0.492323	1
CD6;T-cell differentiation antigen CD6	CD6	P30203	0.0141728	0.00695307	0.0415217	1	0.139772	0.00673778	5.07891e-95	7.19681e-92	0.0046903	0.00515928	0.363304	1
CD63;CD63 antigen	CD63	P08962	0.018074	0.0070861	0.0107572	1	0.169475	0.0068667	2.33937e-133	3.31488e-130	0.00276191	0.00525799	0.599393	1
CD69;Early activation antigen CD69	CD69	Q07108	0.0303707	0.00726264	2.89949e-05	0.0410858	0.087884	0.00703777	1.03987e-35	1.47349e-32	0.0100322	0.00538899	0.0626656	1
CD7;T-cell antigen CD7	CD7	P09564	-0.0620236	0.007209	8.03742e-18	1.1389e-14	0.0674813	0.00698579	4.75796e-22	6.74203e-19	0.00872842	0.00534918	0.102745	1
CD70;CD70 antigen	CD70	P32970	0.0339941	0.00694473	9.8768e-07	0.00139954	-0.00472395	0.0067297	0.482712	1	0.000538886	0.00515309	0.916713	1
CD72;B-cell differentiation antigen CD72	CD72	P21854	-0.0859449	0.00687421	8.61482e-36	1.22072e-32	0.152777	0.00666136	1.47125e-115	2.08476e-112	0.0129925	0.00510076	0.0108643	1
CD74;HLA class II histocompatibility antigen gamma chain	CD74	P04233	-0.105763	0.00673793	2.45339e-55	3.47645e-52	0.12824	0.00652931	1.99284e-85	2.82385e-82	0.0133102	0.00499965	0.00776622	1
CD79B;B-cell antigen receptor complex-associated protein beta chain	CD79B	P40259	-0.147204	0.00703319	1.11125e-96	1.57463e-93	0.0704324	0.00681543	5.3548e-25	7.58775e-22	0.00833961	0.00521874	0.110049	1
CD80;T-lymphocyte activation antigen CD80	CD80	P33681	-0.0884434	0.00694207	4.26858e-37	6.04857e-34	0.10138	0.00672713	3.664e-51	5.19188e-48	-0.00109065	0.00515112	0.832319	1
CD82;CD82 antigen	CD82	P27701	0.00946461	0.00732546	0.19636	1	-0.0141203	0.00709864	0.0466921	1	-0.00570114	0.0054356	0.294253	1
CD83;CD83 antigen	CD83	Q01151	-0.027438	0.00681663	5.70574e-05	0.0808503	0.0826304	0.00660557	7.92254e-36	1.12262e-32	-0.00276044	0.00505804	0.585239	1
CD84;SLAM family member 5	CD84	Q9UIB8	0.0222354	0.00728167	0.0022627	1	0.0615148	0.00705621	2.95749e-18	4.19076e-15	-7.66627e-05	0.00540311	0.98868	1
CD86;T-lymphocyte activation antigen CD86	CD86	P42081	0.0279921	0.00720459	0.000102383	0.145077	0.022172	0.00698152	0.00149546	1	-0.00563448	0.00534592	0.2919	1
CD8A;T-cell surface glycoprotein CD8 alpha chain	CD8A	P01732	-0.0299476	0.00719359	3.14701e-05	0.0445931	0.0510196	0.00697085	2.55157e-13	3.61557e-10	-0.0162907	0.00533775	0.002275	1
CD93;Complement component C1q receptor	CD93	Q9NPY3	-0.0337945	0.00719457	2.64714e-06	0.003751	-0.0366313	0.00697181	1.49535e-07	0.000211891	0.0108941	0.00533848	0.0412899	1
CD99;CD99 antigen	CD99	P14209	0.0574558	0.00625384	4.2422e-20	6.0112e-17	-0.0391393	0.0060602	1.07176e-10	1.51869e-07	0.000686578	0.00464044	0.882379	1
CD99L2;CD99 antigen-like protein 2	CD99L2	Q8TCZ2	0.0760219	0.00679078	4.83606e-29	6.8527e-26	0.0579895	0.00658051	1.2808e-18	1.81489e-15	0.00665161	0.00503886	0.186823	1
CDA;Cytidine deaminase	CDA	P32320	-0.0372556	0.0069906	9.91472e-08	0.000140492	0.0859813	0.00677415	7.82949e-37	1.10944e-33	0.00650939	0.00518713	0.209519	1
CDAN1;Codanin-1	CDAN1	Q8IWY9	0.0171965	0.00732769	0.0189418	1	-0.00708342	0.0071008	0.318503	1	-0.00696713	0.00543725	0.200073	1
CDC123;Cell division cycle protein 123 homolog	CDC123	O75794	-0.00993957	0.00732518	0.17482	1	0.00556026	0.00709837	0.433447	1	-0.00791054	0.00543539	0.145574	1
CDC25A;M-phase inducer phosphatase 1	CDC25A	P30304	-0.00299524	0.00732742	0.68271	1	0.00556338	0.00710054	0.43333	1	-0.00818697	0.00543705	0.132134	1
CDC26;Anaphase-promoting complex subunit CDC26	CDC26	Q8NHZ8	0.0271017	0.00727902	0.000196964	0.279099	0.0767658	0.00705364	1.53416e-27	2.1739e-24	-0.0109506	0.00540114	0.0426232	1
CDC27;Cell division cycle protein 27 homolog	CDC27	P30260	-0.0197581	0.00724103	0.00636306	1	0.150031	0.00701683	8.67021e-101	1.22857e-97	0.0062478	0.00537295	0.244908	1
CDC37;Hsp90 co-chaperone Cdc37	CDC37	Q16543	0.0202143	0.00727796	0.00548141	1	0.0924616	0.00705262	3.55269e-39	5.03416e-36	0.00126099	0.00540036	0.815373	1
CDC42BPB;Serine/threonine-protein kinase MRCK beta	CDC42BPB	Q9Y5S2	0.00650667	0.00723503	0.368483	1	0.133168	0.00701101	4.79632e-80	6.79638e-77	0.0101763	0.0053685	0.0580259	1
CDCP1;CUB domain-containing protein 1	CDCP1	Q9H5V8	-0.0236401	0.00635343	0.00019887	0.281799	0.0905108	0.00615671	8.84065e-49	1.25272e-45	-0.00539557	0.00471434	0.252424	1
CDH1;Cadherin-1	CDH1	P12830	-0.0526237	0.00712811	1.58688e-13	2.2486e-10	0.0613855	0.0069074	6.57381e-19	9.31508e-16	-0.00290748	0.00528916	0.582524	1
CDH15;Cadherin-15	CDH15	P55291	-0.0387654	0.0062895	7.19211e-10	1.01912e-06	0.0356259	0.00609476	5.09982e-09	7.22645e-06	-0.020223	0.0046669	1.47311e-05	0.0208739
CDH17;Cadherin-17	CDH17	Q12864	-0.071923	0.0070687	2.77458e-24	3.93157e-21	0.0201774	0.00684984	0.00322454	1	0.00156594	0.00524508	0.765282	1
CDH2;Cadherin-2	CDH2	P19022	0.00244365	0.00636259	0.700933	1	0.119133	0.00616559	9.37649e-83	1.32865e-79	-0.0206442	0.00472114	1.23063e-05	0.017438
CDH22;Cadherin-22	CDH22	Q9UJ99	0.00518843	0.00732152	0.478543	1	-0.011025	0.00709483	0.120206	1	0.00033865	0.00543268	0.950296	1
CDH23;Cadherin-23	CDH23	Q9H251	0.00357024	0.00726678	0.62321	1	-0.0241338	0.00704178	0.000610478	0.865047	-0.00589088	0.00539206	0.274616	1
CDH3;Cadherin-3	CDH3	P22223	-0.0833618	0.00717508	3.79489e-31	5.37736e-28	0.033596	0.00695292	1.35784e-06	0.00192406	0.0104265	0.00532402	0.0501926	1
CDH4;Cadherin-4	CDH4	P55283	0.0128758	0.00732616	0.078839	1	-0.00456938	0.00709932	0.519816	1	-0.00638587	0.00543612	0.240118	1
CDH5;Cadherin-5	CDH5	P33151	-0.00564167	0.00726253	0.437271	1	-0.0603153	0.00703767	1.07291e-17	1.52032e-14	-0.0169841	0.00538891	0.00162466	1
CDH6;Cadherin-6	CDH6	P55285	-0.021117	0.00716715	0.00321742	1	-0.0234895	0.00694523	0.000720095	1	-0.0129258	0.00531813	0.0150825	1
CDHR1;Cadherin-related family member 1	CDHR1	Q96JP9	-0.010173	0.00722699	0.159245	1	0.0296251	0.00700322	2.34064e-05	0.0331669	0.0104392	0.00536253	0.0515803	1
CDHR2;Cadherin-related family member 2	CDHR2	Q9BYE9	0.0382606	0.00557963	7.13799e-12	1.01145e-08	0.122913	0.00540687	1.39745e-113	1.98019e-110	-0.0263888	0.00414017	1.86622e-10	2.64444e-07
CDHR5;Cadherin-related family member 5	CDHR5	Q9HBB8	0.0532103	0.00690337	1.31288e-14	1.86035e-11	0.136633	0.00668962	3.45859e-92	4.90082e-89	0.00802574	0.0051224	0.117172	1
CDK1;Cyclin-dependent kinase 1	CDK1	P06493	-0.0290335	0.00730613	7.0858e-05	0.100406	0.0477677	0.00707991	1.53333e-11	2.17273e-08	-0.00579096	0.00542125	0.28544	1
CDK5RAP3;CDK5 regulatory subunit-associated protein 3	CDK5RAP3	Q96JB5	-0.0261784	0.00729147	0.00033078	0.468716	0.0964079	0.0070657	2.7889e-42	3.95188e-39	0.00634192	0.00541038	0.241134	1
CDKL5;Cyclin-dependent kinase-like 5	CDKL5	O76039	-0.0244543	0.00732089	0.0008376	1	-0.00147021	0.00709421	0.835823	1	0.00274315	0.00543221	0.613576	1
CDKN1A;Cyclin-dependent kinase inhibitor 1	CDKN1A	P38936	-0.0130539	0.00706569	0.0646824	1	0.237505	0.00684692	2.80084e-259	3.96878e-256	0.0146841	0.00524285	0.00510061	1
CDKN2D;Cyclin-dependent kinase 4 inhibitor D	CDKN2D	P55273	0.0387389	0.00727887	1.03199e-07	0.000146233	0.0749051	0.0070535	2.64849e-26	3.75291e-23	-0.0025178	0.00540103	0.641097	1
CDNF;Cerebral dopamine neurotrophic factor	CDNF	Q49AH0	0.0520237	0.00708966	2.21528e-13	3.13905e-10	0.0946684	0.00687015	4.37016e-43	6.19252e-40	0.00272268	0.00526064	0.60477	1
CDON;Cell adhesion molecule-related/down-regulated by oncogenes	CDON	Q4KMG0	0.065931	0.0070503	9.13147e-21	1.29393e-17	0.108461	0.006832	1.47423e-56	2.08899e-53	0.00834697	0.00523143	0.110599	1
CDSN;Corneodesmosin	CDSN	Q15517	0.0349106	0.00720978	1.29007e-06	0.00182803	-0.0187693	0.00698654	0.00722392	1	0.00629011	0.00534976	0.239693	1
CEACAM1;Carcinoembryonic antigen-related cell adhesion molecule 1	CEACAM1	P13688	0.0880279	0.00666679	1.03459e-39	1.46601e-36	0.0594906	0.00646036	3.48211e-20	4.93415e-17	-0.0257951	0.00494685	1.85411e-07	0.000262728
CEACAM16;Carcinoembryonic antigen-related cell adhesion molecule 16	CEACAM16	Q2WEN9	-0.0262091	0.00707813	0.000213535	0.302579	0.0713653	0.00685897	2.56901e-25	3.64028e-22	0.0230238	0.00525208	1.16993e-05	0.0165779
CEACAM18;Carcinoembryonic antigen-related cell adhesion molecule 18	CEACAM18	A8MTB9	0.00831436	0.00732863	0.25659	1	-0.00618116	0.00710171	0.384101	1	-0.00855355	0.00543795	0.115743	1
CEACAM19;Carcinoembryonic antigen-related cell adhesion molecule 19	CEACAM19	Q7Z692	-0.00269586	0.00713862	0.705696	1	0.0429393	0.00691758	5.45126e-10	7.72443e-07	-0.00191126	0.00529696	0.718235	1
CEACAM20;Carcinoembryonic antigen-related cell adhesion molecule 20	CEACAM20	Q6UY09	-0.0964673	0.00728869	6.84256e-40	9.6959e-37	0.0837295	0.00706301	2.34578e-32	3.32397e-29	0.00813462	0.00540832	0.132566	1
CEACAM21;Carcinoembryonic antigen-related cell adhesion molecule 21	CEACAM21	Q3KPI0	-0.0468082	0.00715369	6.1031e-11	8.64809e-08	0.0300342	0.00693219	1.47784e-05	0.020941	0.0129675	0.00530814	0.0145728	1
CEACAM3;Carcinoembryonic antigen-related cell adhesion molecule 3	CEACAM3	P40198	0.0197378	0.00731006	0.00693541	1	0.0564833	0.00708372	1.58637e-15	2.24789e-12	-0.00740982	0.00542417	0.171924	1
CEACAM5;Carcinoembryonic antigen-related cell adhesion molecule 5	CEACAM5	P06731	0.013303	0.00687925	0.0531472	1	0.0229059	0.00666625	0.000590822	0.837195	0.00748472	0.0051045	0.142576	1
CEACAM6;Carcinoembryonic antigen-related cell adhesion molecule 6	CEACAM6	P40199	-0.0212415	0.00678569	0.00174747	1	-0.0263418	0.00657558	6.1882e-05	0.0876868	0.000807808	0.00503508	0.872539	1
CEACAM8;Carcinoembryonic antigen-related cell adhesion molecule 8	CEACAM8	P31997	-0.0777818	0.00693662	3.93435e-29	5.57498e-26	0.0972715	0.00672184	2.52711e-47	3.58092e-44	0.0132728	0.00514707	0.00992096	1
CEBPA;CCAAT/enhancer-binding protein alpha	CEBPA	P49715	-0.00181023	0.00730322	0.804239	1	0.0461641	0.00707709	6.98335e-11	9.89541e-08	-0.00782546	0.0054191	0.148733	1
CEBPB;CCAAT/enhancer-binding protein beta	CEBPB	P17676	-0.0287752	0.00714954	5.71536e-05	0.0809866	0.111698	0.00692817	2.87361e-58	4.07191e-55	0.00923895	0.00530507	0.0815988	1
CELA2A;Chymotrypsin-like elastase family member 2A	CELA2A	P08217	-0.00182363	0.00722745	0.800795	1	0.0268188	0.00700366	0.000128752	0.182442	0.0157281	0.00536287	0.00336169	1
CELA3A;Chymotrypsin-like elastase family member 3A	CELA3A	P09093	0.0418635	0.00724113	7.47275e-09	1.05889e-05	0.0345308	0.00701693	8.64565e-07	0.00122509	0.00600916	0.00537303	0.263406	1
CELSR2;Cadherin EGF LAG seven-pass G-type receptor 2	CELSR2	Q9HCU4	-0.0388775	0.00714685	5.36913e-08	7.60806e-05	0.137616	0.00692556	2.19752e-87	3.11389e-84	0.0245023	0.00530307	3.8436e-06	0.00544638
CEMIP2;Cell surface hyaluronidase	CEMIP2	Q9UHN6	0.00607098	0.00717307	0.397359	1	0.104187	0.00695097	1.24352e-50	1.76207e-47	-0.0136323	0.00532253	0.010434	1
CEND1;Cell cycle exit and neuronal differentiation protein 1	CEND1	Q8N111	0.0257019	0.0072994	0.000430295	0.609728	-0.011597	0.00707339	0.101112	1	-0.002182	0.00541626	0.687053	1
CENPF;Centromere protein F	CENPF	P49454	-0.0314698	0.00723459	1.36578e-05	0.0193531	0.092088	0.00701058	2.54788e-39	3.61035e-36	-0.00369577	0.00536817	0.491168	1
CENPJ;Centromere protein J	CENPJ	Q9HC77	-0.00520779	0.0073221	0.476938	1	0.027952	0.00709539	8.18234e-05	0.115944	0.00158197	0.00543311	0.770922	1
CEP112;Centrosomal protein of 112 kDa	CEP112	Q8N8E3	-0.0165958	0.00731756	0.0233386	1	0.030475	0.00709099	1.73034e-05	0.0245189	0.00141922	0.00542974	0.793801	1
CEP152;Centrosomal protein of 152 kDa	CEP152	O94986	0.0104989	0.00732299	0.151671	1	0.0263404	0.00709625	0.000206039	0.291957	0.00137169	0.00543376	0.800704	1
CEP164;Centrosomal protein of 164 kDa	CEP164	Q9UPV0	-0.00304485	0.00732461	0.677631	1	0.0245524	0.00709782	0.000542534	0.76877	0.00122283	0.00543497	0.821986	1
CEP170;Centrosomal protein of 170 kDa	CEP170	Q5SW79	0.030233	0.00728098	3.29892e-05	0.0467457	0.0728161	0.00705554	6.18374e-25	8.76236e-22	-0.000509159	0.0054026	0.924916	1
CEP20;Centrosomal protein 20	CEP20	Q96NB1	-0.00662978	0.0071491	0.353746	1	0.184812	0.00692774	3.03716e-155	4.30366e-152	0.0253611	0.00530474	1.75271e-06	0.00248359
CEP290;Centrosomal protein of 290 kDa	CEP290	O15078	0.000367599	0.00732957	0.960001	1	0.00893197	0.00710263	0.20856	1	0.00549486	0.00543865	0.312342	1
CEP350;Centrosome-associated protein 350	CEP350	Q5VT06	0.00179645	0.00732955	0.806382	1	0.0072344	0.00710261	0.308421	1	-0.00133377	0.00543864	0.806273	1
CEP43;Centrosomal protein 43	CEP43	O95684	-0.00419985	0.0071974	0.559545	1	0.152293	0.00697455	5.29925e-105	7.50904e-102	0.00321414	0.00534058	0.547288	1
CEP85;Centrosomal protein of 85 kDa	CEP85	Q6P2H3	-0.0116836	0.00720287	0.104796	1	0.161959	0.00697985	3.21432e-118	4.55469e-115	0.00491362	0.00534464	0.357917	1
CERT;Ceramide transfer protein	CERT1	Q9Y5P4	0.0265529	0.00726115	0.000255706	0.362335	0.0955917	0.00703632	6.22991e-42	8.82778e-39	-0.00847487	0.00538788	0.115739	1
CES1;Liver carboxylesterase 1	CES1	P23141	-0.0490171	0.00637066	1.46096e-14	2.07018e-11	0.282679	0.00617341	0	0	-0.0227913	0.00472713	1.4316e-06	0.00202858
CES2;Cocaine esterase	CES2	O00748	0.0889958	0.00688282	3.71615e-38	5.26578e-35	0.0880117	0.00666971	1.15319e-39	1.63407e-36	-0.0314671	0.00510716	7.28926e-10	1.03289e-06
CES3;Carboxylesterase 3	CES3	Q6UWW8	0.00107805	0.00706584	0.878737	1	0.148148	0.00684706	3.80467e-103	5.39122e-100	-0.0233015	0.00524296	8.84334e-06	0.012531
CETN2;Centrin-2	CETN2	P41208	0.00261844	0.00726293	0.71846	1	0.11366	0.00703805	1.85988e-58	2.63546e-55	0.00191186	0.0053892	0.722773	1
CETN3;Centrin-3	CETN3	O15182	0.0166464	0.00723879	0.0214763	1	0.10936	0.00701466	1.29201e-54	1.83078e-51	-0.000979295	0.00537129	0.855332	1
CFB;Complement factor B	CFB	P00751	0.0563375	0.00656791	1.00686e-17	1.42673e-14	0.0644908	0.00636455	4.26357e-24	6.04148e-21	0.0193428	0.00487349	7.23241e-05	0.102483
CFC1;Cryptic protein	CFC1	P0CG37	-0.0604184	0.00720438	5.19892e-17	7.36687e-14	0.0910202	0.00698131	9.18261e-39	1.30118e-35	-0.00438848	0.00534576	0.411693	1
CFD;Complement factor D	CFD	P00746	-0.0176749	0.00672088	0.0085461	1	0.0353548	0.00651279	5.71987e-08	8.10506e-05	0.00606622	0.004987	0.223838	1
CFH;Complement factor H	CFH	P08603	0.0636244	0.00613887	3.92106e-25	5.55615e-22	0.173997	0.00594879	7.71743e-186	1.09356e-182	0.030647	0.00455513	1.74617e-11	2.47432e-08
CFHR2;Complement factor H-related protein 2	CFHR2	P36980	-0.000501278	0.00724633	0.944849	1	0.0600675	0.00702197	1.23373e-17	1.74819e-14	0.0275962	0.00537689	2.87618e-07	0.000407555
CFHR4;Complement factor H-related protein 4	CFHR4	Q92496	0.151556	0.00721624	2.48187e-97	3.5168e-94	-0.0189935	0.0069928	0.00660773	1	0.0191547	0.00535456	0.00034767	0.492648
CFHR5;Complement factor H-related protein 5	CFHR5	Q9BXR6	0.112934	0.00712098	1.90209e-56	2.69526e-53	0.0377322	0.00690049	4.58101e-08	6.49129e-05	0.0470543	0.00528387	5.57431e-19	7.8988e-16
CFI;Complement factor I	CFI	P05156	0.05251	0.00623766	3.96502e-17	5.61844e-14	0.176411	0.00604453	4.77374e-185	6.7644e-182	0.0352771	0.00462844	2.56373e-14	3.63281e-11
CFP;Properdin	CFP	P27918	0.101576	0.00674877	4.89921e-51	6.94218e-48	0.195543	0.00653981	5.17816e-194	7.33745e-191	0.0227856	0.00500769	5.3795e-06	0.00762275
CGA;Glycoprotein hormones alpha chain	CGA	P01215	0.0661544	0.00511557	3.62942e-38	5.14288e-35	0.00971836	0.00495718	0.0499496	1	0.0109372	0.00379583	0.00396189	1
CGB3_CGB5_CGB8;Choriogonadotropin subunit beta 3	CGB3	P0DN86	0.0331136	0.00691753	1.70058e-06	0.00240973	0.0117822	0.00670334	0.078813	1	0.0024698	0.00513291	0.630399	1
CGN;Cingulin	CGN	Q9P2M7	-0.0165614	0.00732596	0.0237872	1	0.0162494	0.00709912	0.0220895	1	-0.00433166	0.00543597	0.425543	1
CGREF1;Cell growth regulator with EF hand domain protein 1	CGREF1	Q99674	-0.0598596	0.00714748	5.72728e-17	8.11555e-14	0.094953	0.00692617	1.14924e-42	1.62848e-39	0.00533797	0.00530353	0.314185	1
CHAC2;Glutathione-specific gamma-glutamylcyclotransferase 2	CHAC2	Q8WUX2	0.00144831	0.00727001	0.842095	1	0.0935126	0.00704491	4.10236e-40	5.81305e-37	-0.00526113	0.00539446	0.329426	1
CHAD;Chondroadherin	CHAD	O15335	0.102186	0.00713535	2.18058e-46	3.08988e-43	0.0132511	0.00691442	0.0553165	1	0.00473513	0.00529453	0.371145	1
CHCHD10;Coiled-coil-helix-coiled-coil-helix domain-containing protein 10, mitochondrial	CHCHD10	Q8WYQ3	-0.0531192	0.00647608	2.43591e-16	3.45169e-13	0.113046	0.00627556	3.20915e-72	4.54736e-69	0.00528429	0.00480535	0.271484	1
CHCHD6;MICOS complex subunit MIC25	CHCHD6	Q9BRQ6	-0.00670982	0.00713846	0.347248	1	0.0797941	0.00691743	9.95368e-31	1.41044e-27	4.51851e-06	0.00529684	0.999319	1
CHEK2;Serine/threonine-protein kinase Chk2	CHEK2	O96017	0.00523669	0.00732797	0.47485	1	-0.00372584	0.00710107	0.599805	1	-0.0072025	0.00543746	0.18531	1
CHGA;Chromogranin-A	CHGA	P10645	-0.0214472	0.0071051	0.00254159	1	-0.0354196	0.0068851	2.69841e-07	0.000382364	-0.00205163	0.00527209	0.697168	1
CHGB;Secretogranin-1	CHGB	P05060	0.0243764	0.00690444	0.000415244	0.588401	-0.00506359	0.00669066	0.449166	1	0.0133153	0.00512319	0.00935258	1
CHI3L1;Chitinase-3-like protein 1	CHI3L1	P36222	-0.1177	0.00684099	4.52858e-66	6.417e-63	0.103977	0.00662917	2.95726e-55	4.19043e-52	0.000488088	0.00507612	0.923399	1
CHIT1;Chitotriosidase-1	CHIT1	Q13231	-0.0046233	0.00717189	0.519164	1	0.0139488	0.00694983	0.0447491	1	-0.00172231	0.00532165	0.746211	1
CHL1;Neural cell adhesion molecule L1-like protein	CHL1	O00533	0.0862539	0.00718267	3.71646e-33	5.26622e-30	-0.049057	0.00696027	1.84641e-12	2.61637e-09	0.0171463	0.00532965	0.00129587	1
CHM;Rab proteins geranylgeranyltransferase component A 1	CHM	P24386	0.0226888	0.00728906	0.00185516	1	0.0841066	0.00706337	1.25036e-32	1.77176e-29	-0.00717488	0.00540859	0.184659	1
CHMP1A;Charged multivesicular body protein 1a	CHMP1A	Q9HD42	0.0216846	0.00726609	0.0028437	1	0.111969	0.00704111	9.63841e-57	1.36576e-53	0.000891826	0.00539155	0.868621	1
CHMP6;Charged multivesicular body protein 6	CHMP6	Q96FZ7	0.0320014	0.00705014	5.66762e-06	0.00803102	0.235032	0.00683185	3.90876e-255	5.53871e-252	0.0254675	0.00523131	1.13062e-06	0.00160209
CHP1;Calcineurin B homologous protein 1	CHP1	Q99653	0.00183058	0.00732813	0.802742	1	0.00476605	0.00710123	0.502125	1	-0.00675314	0.00543758	0.214268	1
CHRDL1;Chordin-like protein 1	CHRDL1	Q9BU40	0.0231183	0.00636379	0.00028077	0.397851	0.0669972	0.00616675	1.88585e-27	2.67225e-24	0.0306406	0.00472203	8.76275e-11	1.24168e-07
CHRDL2;Chordin-like protein 2	CHRDL2	Q6WN34	-0.0844473	0.00713776	3.10383e-32	4.39812e-29	0.0561769	0.00691675	4.73916e-16	6.71539e-13	-0.00468738	0.00529632	0.376149	1
CHRM1;Muscarinic acetylcholine receptor M1	CHRM1	P11229	-0.00488181	0.00732102	0.504891	1	-0.0166031	0.00709434	0.019272	1	0.0081787	0.0054323	0.132187	1
CIAPIN1;Anamorsin	CIAPIN1	Q6FI81	0.0212577	0.00724036	0.00332681	1	0.106345	0.00701618	9.9059e-52	1.40367e-48	-3.37371e-05	0.00537245	0.99499	1
CILP;Cartilage intermediate layer protein 1	CILP	O75339	0.00777203	0.00678959	0.252342	1	0.0492396	0.00657937	7.38005e-14	1.04575e-10	-0.0106357	0.00503798	0.0347702	1
CINP;Cyclin-dependent kinase 2-interacting protein	CINP	Q9BW66	-0.0126251	0.00732655	0.0848607	1	0.00651785	0.0070997	0.358601	1	-0.0124554	0.00543641	0.0219633	1
CIRBP;Cold-inducible RNA-binding protein	CIRBP	Q14011	0.0609843	0.00721532	2.97051e-17	4.20922e-14	0.110043	0.00699191	1.27236e-55	1.80294e-52	0.00795202	0.00535387	0.137477	1
CIT;Citron Rho-interacting kinase	CIT	O14578	-0.0453105	0.00724733	4.0981e-10	5.80701e-07	0.110441	0.00702294	1.55832e-55	2.20814e-52	0.00377367	0.00537763	0.482849	1
CKAP4;Cytoskeleton-associated protein 4	CKAP4	Q07065	-0.062724	0.00698731	2.92094e-19	4.13897e-16	0.063669	0.00677096	5.59868e-21	7.93333e-18	0.00990344	0.00518469	0.0561242	1
CKB;Creatine kinase B-type	CKB	P12277	-0.0143951	0.00619335	0.0201163	1	-0.136633	0.00600158	6.60197e-114	9.355e-111	0.0167445	0.00459556	0.000269196	0.38145
CKMT1A_CKMT1B;Creatine kinase U-type, mitochondrial	CKMT1A	P12532	-0.049392	0.00727959	1.17921e-11	1.67094e-08	0.0222871	0.00705419	0.00158224	1	0.0196223	0.00540156	0.000280851	0.397965
CLASP1;CLIP-associating protein 1	CLASP1	Q7Z460	-0.00811861	0.00731363	0.266979	1	0.0291391	0.00708718	3.9394e-05	0.0558213	0.00288247	0.00542682	0.595316	1
CLC;Galectin-10	CLC	Q05315	-0.0194237	0.00720615	0.00703296	1	0.00656737	0.00698303	0.34698	1	0.00520429	0.00534707	0.330412	1
CLEC10A;C-type lectin domain family 10 member A	CLEC10A	Q8IUN9	0.0384533	0.00715663	7.78835e-08	0.000110361	-0.0381411	0.00693504	3.82935e-08	5.42619e-05	0.00818295	0.00531033	0.123338	1
CLEC11A;C-type lectin domain family 11 member A	CLEC11A	Q9Y240	0.011344	0.00723093	0.116698	1	-0.00131761	0.00700704	0.850846	1	-0.00367459	0.00536545	0.493436	1
CLEC12A;C-type lectin domain family 12 member A	CLEC12A	Q5QGZ9	-0.019581	0.00729838	0.00730139	1	0.0356216	0.0070724	4.75931e-07	0.000674394	-4.7301e-05	0.0054155	0.993031	1
CLEC14A;C-type lectin domain family 14 member A	CLEC14A	Q86T13	-0.0746602	0.00697918	1.14813e-26	1.6269e-23	0.0219534	0.00676308	0.00117122	1	0.00717733	0.00517865	0.165773	1
CLEC1A;C-type lectin domain family 1 member A	CLEC1A	Q8NC01	-0.0228403	0.00718424	0.00147801	1	0.00842727	0.0069618	0.226094	1	0.026397	0.00533081	7.38788e-07	0.00104686
CLEC1B;C-type lectin domain family 1 member B	CLEC1B	Q9P126	0.0177032	0.00718597	0.0137605	1	0.152349	0.00696347	2.10376e-105	2.98103e-102	0.00742254	0.0053321	0.163917	1
CLEC2L;C-type lectin domain family 2 member L	CLEC2L	P0C7M8	-0.0127919	0.00731678	0.0804218	1	-0.000250252	0.00709023	0.971844	1	0.000925883	0.00542916	0.864587	1
CLEC3B;Tetranectin	CLEC3B	P05452	0.115345	0.0071444	2.00345e-58	2.83889e-55	0.0624275	0.00692319	2.02525e-19	2.86978e-16	0.00685897	0.00530125	0.19573	1
CLEC4A;C-type lectin domain family 4 member A	CLEC4A	Q9UMR7	0.107341	0.00709364	1.44559e-51	2.0484e-48	-0.161454	0.006874	4.65281e-121	6.59303e-118	-0.00480423	0.00526358	0.361391	1
CLEC4C;C-type lectin domain family 4 member C	CLEC4C	Q8WTT0	-0.00160068	0.00724306	0.825097	1	0.000963969	0.0070188	0.890762	1	0.00145537	0.00537446	0.786551	1
CLEC4D;C-type lectin domain family 4 member D	CLEC4D	Q8WXI8	-0.0807279	0.00684402	4.73635e-32	6.71141e-29	0.0889108	0.00663211	7.0133e-41	9.93785e-38	0.0104322	0.00507836	0.0399589	1
CLEC4G;C-type lectin domain family 4 member G	CLEC4G	Q6UXB4	0.0689435	0.00699402	6.81057e-23	9.65058e-20	0.0871026	0.00677746	1.02149e-37	1.44745e-34	0.0110296	0.00518967	0.0335687	1
CLEC4M;C-type lectin domain family 4 member M	CLEC4M	Q9H2X3	0.179125	0.00718255	4.27026e-136	6.05095e-133	-0.0912528	0.00696015	3.53033e-39	5.00247e-36	-0.0159721	0.00532956	0.00272931	1
CLEC5A;C-type lectin domain family 5 member A	CLEC5A	Q9NY25	-0.0363906	0.00690589	1.37594e-07	0.00019497	-0.0172809	0.00669207	0.00981849	1	0.0208874	0.00512427	4.58844e-05	0.0650182
CLEC6A;C-type lectin domain family 6 member A	CLEC6A	Q6EIG7	-0.0879185	0.00707644	2.29298e-35	3.24916e-32	0.0722697	0.00685733	6.23839e-26	8.83979e-23	0.00641383	0.00525082	0.221908	1
CLEC7A;C-type lectin domain family 7 member A	CLEC7A	Q9BXN2	-0.0343705	0.00718714	1.74063e-06	0.00246648	0.022953	0.0069646	0.000982853	1	0.0171109	0.00533296	0.00133544	1
CLGN;Calmegin	CLGN	O14967	-0.0332908	0.00725289	4.44765e-06	0.00630231	0.0601075	0.00702832	1.25576e-17	1.77941e-14	0.000178924	0.00538175	0.973478	1
CLIC5;Chloride intracellular channel protein 5	CLIC5	Q9NZA1	0.0145405	0.00730423	0.0465219	1	-0.0360289	0.00707807	3.59506e-07	0.00050942	0.0102333	0.00541985	0.0590185	1
CLINT1;Clathrin interactor 1	CLINT1	Q14677	-0.000734316	0.00732855	0.920187	1	0.00792389	0.00710164	0.264523	1	-0.00105647	0.00543789	0.845958	1
CLIP2;CAP-Gly domain-containing linker protein 2	CLIP2	Q9UDT6	0.0174386	0.00723396	0.015929	1	0.131553	0.00700998	3.41583e-78	4.84023e-75	0.00500767	0.00536771	0.350865	1
CLMP;CXADR-like membrane protein	CLMP	Q9H6B4	0.0191891	0.00602158	0.00144019	1	0.012808	0.00583513	0.0281721	1	0.0101569	0.0044681	0.02302	1
CLNS1A;Methylosome subunit pICln	CLNS1A	P54105	-0.0210375	0.00731882	0.00404987	1	0.0340178	0.00709221	1.62118e-06	0.00229721	-0.00538359	0.00543067	0.321532	1
CLPP;ATP-dependent Clp protease proteolytic subunit, mitochondrial	CLPP	Q16740	-0.02214	0.00725318	0.00227152	1	0.0968459	0.00702861	4.42123e-43	6.26488e-40	0.0126713	0.00538197	0.0185585	1
CLPS;Colipase	CLPS	P04118	0.025975	0.00724883	0.000339691	0.481343	0.0123714	0.00702438	0.0782114	1	-0.00222989	0.00537874	0.678456	1
CLSPN;Claspin	CLSPN	Q9HAW4	0.00713175	0.00732529	0.330273	1	0.0212352	0.00709848	0.00277792	1	-0.00590665	0.00543548	0.277184	1
CLSTN1;Calsyntenin-1	CLSTN1	O94985	0.0282933	0.00729855	0.000106133	0.15039	0.017128	0.00707256	0.0154507	1	0.00158784	0.00541563	0.769374	1
CLSTN2;Calsyntenin-2	CLSTN2	Q9H4D0	0.0154555	0.00719332	0.0316737	1	-0.0285709	0.00697059	4.16264e-05	0.0589846	-0.0262965	0.00533755	8.40106e-07	0.00119043
CLSTN3;Calsyntenin-3	CLSTN3	Q9BQT9	0.00450671	0.00711378	0.5264	1	0.0847606	0.00689352	1.12543e-34	1.59474e-31	-0.00841439	0.00527853	0.110928	1
CLTA;Clathrin light chain A	CLTA	P09496	-0.00876197	0.0072693	0.228081	1	0.0973821	0.00704422	2.35781e-43	3.34101e-40	-0.00807732	0.00539393	0.134277	1
CLU;Clusterin	CLU	P10909	0.104463	0.00724464	5.32677e-47	7.54803e-44	0.0146001	0.00702032	0.0375607	1	-0.00448822	0.00537563	0.403769	1
CLUL1;Clusterin-like protein 1	CLUL1	Q15846	0.110084	0.0067979	9.08977e-59	1.28802e-55	-0.189821	0.00658742	1.69939e-180	2.40803e-177	-0.0340253	0.00504414	1.54838e-11	2.19405e-08
CMC1;COX assembly mitochondrial protein homolog	CMC1	Q7Z7K0	0.0240415	0.00722109	0.000871383	1	0.141502	0.00699751	2.0553e-90	2.91236e-87	0.00894927	0.00535816	0.0948859	1
CMIP;C-Maf-inducing protein	CMIP	Q8IY22	0.018068	0.00721621	0.0122909	1	0.155597	0.00699277	6.19918e-109	8.78423e-106	0.0110823	0.00535453	0.0384869	1
CNDP1;Beta-Ala-His dipeptidase	CNDP1	Q96KN2	0.101588	0.00715841	1.382e-45	1.95829e-42	0.0448808	0.00693677	9.92975e-11	1.40705e-07	0.0196779	0.00531165	0.00021199	0.30039
CNGB3;Cyclic nucleotide-gated cation channel beta-3	CNGB3	Q9NQW8	-0.00764086	0.00732884	0.297152	1	0.00141392	0.00710192	0.842194	1	-0.00185124	0.00543811	0.733543	1
CNP;2',3'-cyclic-nucleotide 3'-phosphodiesterase	CNP	P09543	-0.0256914	0.00722292	0.000375721	0.532396	0.136242	0.00699928	5.99595e-84	8.49626e-81	-0.00355298	0.00535952	0.50738	1
CNPY2;Protein canopy homolog 2	CNPY2	Q9Y2B0	0.0106212	0.00732014	0.146802	1	0.0328582	0.00709348	3.63154e-06	0.00514589	-0.00328675	0.00543165	0.545109	1
CNPY4;Protein canopy homolog 4	CNPY4	Q8N129	0.0339979	0.00725324	2.77905e-06	0.00393791	0.102805	0.00702866	2.6357e-48	3.73479e-45	-0.0042506	0.00538201	0.429663	1
CNST;Consortin	CNST	Q6PJW8	0.0157635	0.00724131	0.029496	1	0.11927	0.0070171	1.56209e-64	2.21349e-61	0.0107238	0.00537316	0.0459619	1
CNTF;Ciliary neurotrophic factor	CNTF	P26441	0.0126984	0.0073284	0.0831463	1	-0.009844	0.00710149	0.165698	1	-0.00256803	0.00543778	0.636746	1
CNTN1;Contactin-1	CNTN1	Q12860	0.0756938	0.00669278	1.32045e-29	1.87107e-26	-0.0515311	0.00648556	1.99109e-15	2.82137e-12	0.00572056	0.00496615	0.249365	1
CNTN2;Contactin-2	CNTN2	Q02246	0.0494154	0.00703481	2.18863e-12	3.10129e-09	-0.00298233	0.00681699	0.661763	1	-0.0042827	0.00521993	0.411965	1
CNTN3;Contactin-3	CNTN3	Q9P232	0.0678038	0.00621962	1.25365e-27	1.77643e-24	0.15814	0.00602705	2.69834e-150	3.82355e-147	-0.0187103	0.00461505	5.04138e-05	0.0714364
CNTN4;Contactin-4	CNTN4	Q8IWV2	0.03737	0.00708055	1.31489e-07	0.00018632	-0.0303915	0.00686132	9.47834e-06	0.0134308	0.00433042	0.00525388	0.409812	1
CNTN5;Contactin-5	CNTN5	O94779	0.0631394	0.00671599	5.69945e-21	8.07612e-18	-0.0202877	0.00650804	0.00182642	1	-0.00111021	0.00498336	0.823705	1
CNTNAP2;Contactin-associated protein-like 2	CNTNAP2	Q9UHC6	0.0180904	0.00709594	0.0107951	1	0.000167031	0.00687623	0.980621	1	-0.00701647	0.00526529	0.182675	1
CNTNAP4;Contactin-associated protein-like 4	CNTNAP4	Q9C0A0	-0.0125718	0.00730581	0.0852981	1	0.00269924	0.0070796	0.703005	1	-0.00433823	0.00542102	0.423565	1
COCH;Cochlin	COCH	O43405	-0.00951576	0.0070077	0.174504	1	0.15691	0.00679072	2.97184e-117	4.2111e-114	0.00498173	0.00519982	0.33804	1
COL15A1;Collagen alpha-1(XV) chain	COL15A1	P39059	0.0442675	0.00666437	3.13069e-11	4.43619e-08	0.0672937	0.00645803	2.18394e-25	3.09465e-22	0.011003	0.00494506	0.0260842	1
COL18A1;Collagen alpha-1(XVIII) chain	COL18A1	P39060	-0.0278279	0.00661403	2.58963e-05	0.036695	0.182803	0.00640924	6.45524e-177	9.14708e-174	0.0472592	0.00490771	6.38143e-22	9.04249e-19
COL1A1;Collagen alpha-1(I) chain	COL1A1	P02452	0.0239555	0.00726699	0.000980014	1	-0.0414917	0.00704198	3.84904e-09	5.45409e-06	-0.00365597	0.00539221	0.49777	1
COL24A1;Collagen alpha-1(XXIV) chain	COL24A1	Q17RW2	0.0393804	0.00716832	3.96372e-08	5.61659e-05	0.0400554	0.00694636	8.16673e-09	1.15723e-05	-0.0117634	0.005319	0.027002	1
COL28A1;Collagen alpha-1(XXVIII) chain	COL28A1	Q2UY09	0.014305	0.00723255	0.047952	1	0.0429133	0.00700861	9.28333e-10	1.31545e-06	-0.0127643	0.00536666	0.0173913	1
COL2A1;Collagen alpha-1(II) chain	COL2A1	P02458	0.00753806	0.00720857	0.295703	1	0.0886434	0.00698537	8.10337e-37	1.14825e-33	-0.00349109	0.00534886	0.513968	1
COL3A1;Collagen alpha-1(III) chain	COL3A1	P02461	-0.0834045	0.00723234	1.03139e-30	1.46148e-27	0.0548711	0.00700841	5.04161e-15	7.14397e-12	0.00180497	0.0053665	0.736616	1
COL4A1;Collagen alpha-1(IV) chain	COL4A1	P02462	-0.126897	0.00692705	1.29616e-74	1.83667e-71	-0.0760493	0.00671257	1.05657e-29	1.49716e-26	0.00551883	0.00513997	0.282961	1
COL4A4;Collagen alpha-4(IV) chain	COL4A4	P53420	-0.0033044	0.00732882	0.652081	1	-0.00176241	0.0071019	0.804012	1	0.000419693	0.00543809	0.938484	1
COL5A1;Collagen alpha-1(V) chain	COL5A1	P20908	-0.0869108	0.00719741	1.66148e-33	2.35431e-30	0.0585636	0.00697456	4.75973e-17	6.74454e-14	-0.0109255	0.00534059	0.0407891	1
COL6A3;Collagen alpha-3(VI) chain	COL6A3	P12111	-0.0456823	0.00649803	2.10029e-12	2.97612e-09	0.0849587	0.00629684	2.20006e-41	3.11749e-38	0.00926363	0.00482164	0.0547066	1
COL9A1;Collagen alpha-1(IX) chain	COL9A1	P20849	0.07544	0.00714839	5.35546e-26	7.58869e-23	-0.00980929	0.00692706	0.15676	1	0.00516157	0.00530421	0.330506	1
COL9A2;Collagen alpha-2(IX) chain	COL9A2	Q14055	-0.0063822	0.00732045	0.383306	1	0.0246022	0.00709379	0.000524702	0.743503	-0.00507404	0.00543188	0.350247	1
COLEC12;Collectin-12	COLEC12	Q5KU26	-0.017623	0.00629391	0.00511284	1	0.0813659	0.00609904	1.6809e-40	2.38184e-37	0.0172724	0.00467018	0.00021726	0.307857
COMMD1;COMM domain-containing protein 1	COMMD1	Q8N668	0.0133204	0.00723527	0.0656253	1	0.117437	0.00701125	9.93257e-63	1.40744e-59	-0.00254026	0.00536868	0.6361	1
COMMD9;COMM domain-containing protein 9	COMMD9	Q9P000	-0.0036045	0.00731872	0.622367	1	0.0115069	0.00709212	0.104707	1	-0.00189688	0.0054306	0.726871	1
COMP;Cartilage oligomeric matrix protein	COMP	P49747	0.0524701	0.00686309	2.13796e-14	3.02948e-11	0.0124121	0.00665059	0.0620058	1	0.00633921	0.00509251	0.21321	1
COMT;Catechol O-methyltransferase	COMT	P21964	0.0247817	0.00722765	0.000607084	0.860238	0.0956981	0.00700386	2.14751e-42	3.04303e-39	-0.0039383	0.00536302	0.462744	1
COPB2;Coatomer subunit beta'	COPB2	P35606	-0.0163001	0.00730902	0.0257452	1	0.0648561	0.00708271	5.61721e-20	7.95959e-17	0.00220463	0.0054234	0.684375	1
COPE;Coatomer subunit epsilon	COPE	O14579	0.00123035	0.00732838	0.866672	1	0.00664167	0.00710148	0.349665	1	-0.00548047	0.00543777	0.313532	1
COQ7;5-demethoxyubiquinone hydroxylase, mitochondrial	COQ7	Q99807	0.0788064	0.00720608	8.58508e-28	1.21651e-24	0.0680959	0.00698296	1.93591e-22	2.74319e-19	-0.0124827	0.00534702	0.0195745	1
CORO1A;Coronin-1A	CORO1A	P31146	0.0307561	0.00727014	2.33794e-05	0.0331286	0.0571588	0.00704504	5.08283e-16	7.20236e-13	-0.00436681	0.00539455	0.418242	1
CORO6;Coronin-6	CORO6	Q6QEF8	-0.00973626	0.0072873	0.181539	1	-0.00238977	0.00706167	0.735053	1	-0.00327617	0.00540729	0.544597	1
COX5B;Cytochrome c oxidase subunit 5B, mitochondrial	COX5B	P10606	-0.0170319	0.00725794	0.0189484	1	0.101065	0.00703322	1.0871e-46	1.54042e-43	0.00201651	0.0053855	0.708085	1
COX6B1;Cytochrome c oxidase subunit 6B1	COX6B1	P14854	-0.0174267	0.00727472	0.0166025	1	0.112357	0.00704947	5.43408e-57	7.70009e-54	0.0104056	0.00539795	0.0539005	1
CPA1;Carboxypeptidase A1	CPA1	P15085	-0.0432376	0.00724163	2.38498e-09	3.37952e-06	0.117706	0.00701741	6.69839e-63	9.49161e-60	0.00873804	0.00537339	0.103923	1
CPA2;Carboxypeptidase A2	CPA2	P48052	-0.113343	0.00720502	1.43195e-55	2.02908e-52	0.152315	0.00698193	8.15272e-105	1.15524e-101	0.00469681	0.00534623	0.379664	1
CPA4;Carboxypeptidase A4	CPA4	Q9UI42	0.00938235	0.00725998	0.196249	1	0.0309145	0.00703519	1.11474e-05	0.0157959	0.005433	0.00538701	0.313204	1
CPB1;Carboxypeptidase B	CPB1	P15086	-0.0719327	0.00720859	2.02864e-23	2.87458e-20	0.133595	0.00698539	4.0417e-81	5.72709e-78	0.00840802	0.00534888	0.115978	1
CPB2;Carboxypeptidase B2	CPB2	Q96IY4	0.167971	0.00697993	6.18068e-127	8.75802e-124	0.106073	0.00676381	3.07157e-55	4.35242e-52	0.0165647	0.00517921	0.00138361	1
CPE;Carboxypeptidase E	CPE	P16870	0.0819941	0.0072464	1.24222e-29	1.76022e-26	-0.0653637	0.00702203	1.37055e-20	1.94206e-17	-0.0201767	0.00537694	0.000175394	0.248533
CPLX2;Complexin-2	CPLX2	Q6PUV4	0.0156069	0.00732151	0.0330427	1	-0.0128352	0.00709482	0.0704439	1	0.000205161	0.00543267	0.969876	1
CPM;Carboxypeptidase M	CPM	P14384	0.0206525	0.00612438	0.000746567	1	0.174907	0.00593475	1.30204e-188	1.84499e-185	-0.0189173	0.00454438	3.15123e-05	0.0446529
CPOX;Oxygen-dependent coproporphyrinogen-III oxidase, mitochondrial	CPOX	P36551	0.0129823	0.00726466	0.0739387	1	0.011207	0.00703973	0.111401	1	-0.0248867	0.00539049	3.91105e-06	0.00554195
CPPED1;Serine/threonine-protein phosphatase CPPED1	CPPED1	Q9BRF8	-0.00327061	0.00709936	0.645024	1	0.113453	0.00687954	7.15712e-61	1.01416e-57	0.000232055	0.00526783	0.964864	1
CPQ;Carboxypeptidase Q	CPQ	Q9Y646	0.0300957	0.00718424	2.8071e-05	0.0397767	0.0372253	0.00696179	8.99355e-08	0.000127439	-0.0138168	0.00533081	0.00954957	1
CPTP;Ceramide-1-phosphate transfer protein	CPTP	Q5TA50	-0.0451841	0.00731311	6.54201e-10	9.27003e-07	0.0121182	0.00708668	0.0872755	1	0.0128664	0.00542644	0.0177424	1
CPVL;Probable serine carboxypeptidase CPVL	CPVL	Q9H3G5	-0.00386006	0.00726738	0.595319	1	0.0275943	0.00704236	8.9334e-05	0.126586	0.000704293	0.0053925	0.896088	1
CPXM1;Probable carboxypeptidase X1	CPXM1	Q96SM3	-0.00174123	0.00723177	0.809731	1	0.109985	0.00700785	2.54097e-55	3.60056e-52	0.00571168	0.00536608	0.287152	1
CPXM2;Inactive carboxypeptidase-like protein X2	CPXM2	Q8N436	-0.0287062	0.00687557	2.98575e-05	0.0423081	0.115657	0.00666268	3.21436e-67	4.55475e-64	0.00685026	0.00510177	0.179371	1
CR1;Complement receptor type 1	CR1	P17927	0.000240499	0.00706251	0.972835	1	0.0642463	0.00684383	6.50123e-21	9.21224e-18	0.00657455	0.00524048	0.209643	1
CR2;Complement receptor type 2	CR2	P20023	-0.0299145	0.00716587	2.99249e-05	0.0424036	0.0509088	0.00694399	2.32749e-13	3.29805e-10	0.00272833	0.00531718	0.607874	1
CRACR2A;EF-hand calcium-binding domain-containing protein 4B	CRACR2A	Q9BSW2	0.0243177	0.00727444	0.000829947	1	0.0894981	0.0070492	7.47527e-37	1.05925e-33	-0.000673495	0.00539774	0.900704	1
CRADD;Death domain-containing protein CRADD	CRADD	P78560	0.043361	0.00725621	2.31291e-09	3.27739e-06	0.09785	0.00703153	6.63095e-44	9.39605e-41	-0.000522273	0.00538421	0.922726	1
CREB3;Cyclic AMP-responsive element-binding protein 3	CREB3	O43889	-0.000877896	0.00732746	0.904635	1	-0.000312978	0.00710058	0.964843	1	0.000668374	0.00543708	0.902164	1
CREBZF;CREB/ATF bZIP transcription factor	CREBZF	Q9NS37	-0.00189817	0.00731181	0.795172	1	-0.0291762	0.00708541	3.83411e-05	0.0543294	-0.00576558	0.00542547	0.287931	1
CREG1;Protein CREG1	CREG1	O75629	-0.0148875	0.00689814	0.0309194	1	0.140154	0.00668456	5.16598e-97	7.32019e-94	-0.0382527	0.00511853	7.99739e-14	1.13323e-10
CRELD1;Protein disulfide isomerase CRELD1	CRELD1	Q96HD1	-0.0868837	0.006717	3.49371e-38	4.95058e-35	0.174244	0.00650902	2.68491e-156	3.80451e-153	0.000206708	0.00498411	0.966919	1
CRELD2;Protein disulfide isomerase CRELD2	CRELD2	Q6UXH1	-0.0299178	0.00712725	2.70346e-05	0.0383081	0.154427	0.00690657	5.69706e-110	8.07274e-107	0.00479154	0.00528853	0.364929	1
CRH;Corticoliberin	CRH	P06850	-0.0016618	0.00715397	0.816314	1	0.0702898	0.00693247	3.99397e-24	5.65945e-21	0.0411992	0.00530836	8.63982e-15	1.22426e-11
CRHBP;Corticotropin-releasing factor-binding protein	CRHBP	P24387	0.00489329	0.00673226	0.467327	1	0.128907	0.00652381	1.95511e-86	2.77039e-83	0.0126182	0.00499544	0.011543	1
CRHR1;Corticotropin-releasing factor receptor 1	CRHR1	P34998	-0.00216281	0.0073264	0.767837	1	0.00647437	0.00709955	0.361806	1	-0.00696176	0.0054363	0.20034	1
CRIM1;Cysteine-rich motor neuron 1 protein	CRIM1	Q9NZV1	-0.0439673	0.00702042	3.82546e-10	5.42067e-07	-0.051317	0.00680305	4.69477e-14	6.65249e-11	0.0178061	0.00520926	0.000631174	0.894374
CRIP2;Cysteine-rich protein 2	CRIP2	P52943	-0.03463	0.00647803	9.05947e-08	0.000128373	0.224673	0.00627745	1.35539e-275	1.92059e-272	0.0227206	0.00480679	2.29009e-06	0.00324506
CRISP2;Cysteine-rich secretory protein 2	CRISP2	P16562	0.0399967	0.0062728	1.83772e-10	2.60405e-07	-0.0202147	0.00607858	0.000883301	1	-0.0126298	0.00465451	0.00666177	1
CRISP3;Cysteine-rich secretory protein 3	CRISP3	P54108	-0.0256629	0.0070984	0.000300412	0.425684	-0.0382967	0.00687861	2.60291e-08	3.68832e-05	-0.000700716	0.00526712	0.894166	1
CRKL;Crk-like protein	CRKL	P46109	0.0248392	0.00725103	0.000614116	0.870202	0.113515	0.00702652	1.69486e-58	2.40162e-55	-0.00448927	0.00538037	0.404073	1
CRLF1;Cytokine receptor-like factor 1	CRLF1	O75462	-0.0457758	0.00693399	4.12355e-11	5.84307e-08	0.0591907	0.0067193	1.31836e-18	1.86811e-15	-0.00330987	0.00514513	0.520033	1
CRNN;Cornulin	CRNN	Q9UBG3	0.0574889	0.00697671	1.77918e-16	2.5211e-13	-0.0078183	0.00676069	0.247511	1	0.00921236	0.00517682	0.0751601	1
CRTAC1;Cartilage acidic protein 1	CRTAC1	Q9NQ79	0.0741687	0.00685159	2.89157e-27	4.09735e-24	-0.0181564	0.00663944	0.00624828	1	0.0097943	0.00508398	0.0540496	1
CRTAM;Cytotoxic and regulatory T-cell molecule	CRTAM	O95727	-0.0256061	0.00713805	0.00033461	0.474142	0.0160462	0.00691703	0.0203565	1	-0.0139671	0.00529654	0.00836742	1
CRTAP;Cartilage-associated protein	CRTAP	O75718	0.00789117	0.00729115	0.279129	1	0.0153863	0.0070654	0.0294348	1	-0.002475	0.00541014	0.647334	1
CRX;Cone-rod homeobox protein	CRX	O43186	0.005433	0.00732287	0.45814	1	-0.0074595	0.00709614	0.293171	1	0.00727731	0.00543368	0.180482	1
CRYBB1;Beta-crystallin B1	CRYBB1	P53674	0.019042	0.00724415	0.00857743	1	0.0964884	0.00701985	7.03434e-43	9.96766e-40	0.00643041	0.00537527	0.231589	1
CRYBB2;Beta-crystallin B2	CRYBB2	P43320	0.0109412	0.00721868	0.12961	1	-0.000750101	0.00699517	0.914606	1	-0.00179699	0.00535637	0.737259	1
CRYGD;Gamma-crystallin D	CRYGD	P07320	0.0128425	0.00728544	0.0779488	1	0.0669547	0.00705986	2.59824e-21	3.68171e-18	-0.00420626	0.0054059	0.436523	1
CRYM;Ketimine reductase mu-crystallin	CRYM	Q14894	0.00308129	0.0072889	0.672489	1	0.0689549	0.00706322	1.74079e-22	2.4667e-19	-0.00199163	0.00540847	0.712695	1
CRYZL1;Quinone oxidoreductase-like protein 1	CRYZL1	O95825	0.0156433	0.00727197	0.0314689	1	0.0983262	0.00704681	3.93771e-44	5.57973e-41	-0.00580726	0.00539591	0.28183	1
CSDE1;Cold shock domain-containing protein E1	CSDE1	O75534	-0.016395	0.00729637	0.0246456	1	0.0615172	0.00707045	3.44172e-18	4.87692e-15	-0.000899296	0.00541401	0.868075	1
CSF1;Macrophage colony-stimulating factor 1	CSF1	P09603	-0.135146	0.00688426	2.39849e-85	3.39866e-82	0.0889088	0.0066711	2.00811e-40	2.84549e-37	0.0241009	0.00510822	2.39008e-06	0.00338675
CSF1R;Macrophage colony-stimulating factor 1 receptor	CSF1R	P07333	-0.0643959	0.00698374	3.10658e-20	4.40203e-17	0.0723916	0.0067675	1.15577e-26	1.63773e-23	0.0100951	0.00518204	0.0514114	1
CSF2;Granulocyte-macrophage colony-stimulating factor	CSF2	P04141	-0.0341037	0.0072115	2.26426e-06	0.00320845	0.0641118	0.00698821	4.78585e-20	6.78154e-17	-0.00294378	0.00535104	0.582232	1
CSF2RA;Granulocyte-macrophage colony-stimulating factor receptor subunit alpha	CSF2RA	P15509	-0.0184041	0.00723916	0.0110167	1	0.0292047	0.00701501	3.14612e-05	0.0445806	-0.00300615	0.00537156	0.575728	1
CSF2RB;Cytokine receptor common subunit beta	CSF2RB	P32927	-0.00528407	0.00725126	0.466184	1	0.00398915	0.00702674	0.570236	1	0.00234686	0.00538054	0.662712	1
CSF3;Granulocyte colony-stimulating factor	CSF3	P09919	0.0117323	0.00704858	0.0960225	1	0.0219242	0.00683033	0.00132931	1	0.0240945	0.00523015	4.10259e-06	0.00581337
CSF3R;Granulocyte colony-stimulating factor receptor	CSF3R	Q99062	-0.038155	0.00718801	1.1141e-07	0.000157868	0.0671317	0.00696544	5.89147e-22	8.34822e-19	-0.00248078	0.00533361	0.641846	1
CSH1;Chorionic somatomammotropin hormone 1	CSH1	P0DML2	-0.00126362	0.00732707	0.863077	1	-0.000541194	0.00710021	0.939243	1	0.0151918	0.0054368	0.00520482	1
CSNK1D;Casein kinase I isoform delta	CSNK1D	P48730	-0.00776541	0.00727768	0.285972	1	0.0837805	0.00705234	1.73847e-32	2.46342e-29	-0.00717116	0.00540015	0.184201	1
CSNK2A1;Casein kinase II subunit alpha	CSNK2A1	P68400	-0.0276686	0.00722194	0.000127743	0.181012	-0.124782	0.00699832	8.43008e-71	1.19454e-67	0.0134222	0.00535878	0.0122598	1
CSPG4;Chondroitin sulfate proteoglycan 4	CSPG4	Q6UVK1	0.0358537	0.00674288	1.05975e-07	0.000150167	-0.058303	0.0065341	4.75719e-19	6.74093e-16	0.0007111	0.00500332	0.886982	1
CSPG5;Chondroitin sulfate proteoglycan 5	CSPG5	O95196	-0.00322324	0.00729425	0.658574	1	-0.0184766	0.0070684	0.00895347	1	0.00382732	0.00541244	0.479489	1
CSRP3;Cysteine and glycine-rich protein 3	CSRP3	P50461	-0.0170696	0.00721557	0.0180031	1	0.00421026	0.00699216	0.547085	1	0.0113596	0.00535406	0.0338717	1
CST1;Cystatin-SN	CST1	P01037	-0.027102	0.00705795	0.000123287	0.174698	0.0594931	0.00683941	3.50361e-18	4.96462e-15	0.0106196	0.0052371	0.0425929	1
CST3;Cystatin-C	CST3	P01034	-0.0365386	0.00634716	8.64897e-09	1.22556e-05	0.148868	0.00615063	2.27696e-128	3.22646e-125	0.0186097	0.00470969	7.78592e-05	0.110326
CST5;Cystatin-D	CST5	P28325	-0.00899859	0.00701762	0.199751	1	0.0561189	0.00680034	1.60626e-16	2.27607e-13	0.00611991	0.00520718	0.239889	1
CST6;Cystatin-M	CST6	Q15828	-0.0200593	0.00694679	0.00388473	1	0.0166953	0.0067317	0.0131389	1	0.00498758	0.00515462	0.333254	1
CST7;Cystatin-F	CST7	O76096	-0.0470852	0.00721031	6.65464e-11	9.42963e-08	0.0645751	0.00698706	2.54805e-20	3.61058e-17	0.0166633	0.00535015	0.00184375	1
CSTB;Cystatin-B	CSTB	P04080	-0.0365587	0.00691463	1.24977e-07	0.000177092	0.114691	0.00670054	2.04963e-65	2.90433e-62	0.000864687	0.00513076	0.866167	1
CTAG1A_CTAG1B;Cancer/testis antigen 1	CTAG1A	P78358	6.71164e-05	0.00732805	0.992692	1	0.00288372	0.00710115	0.684678	1	0.00276028	0.00543752	0.611712	1
CTBS;Di-N-acetylchitobiase	CTBS	Q01459	-0.0215638	0.0069973	0.00205959	1	0.139959	0.00678065	4.25175e-94	6.02473e-91	-0.00620286	0.0051921	0.232223	1
CTF1;Cardiotrophin-1	CTF1	Q16619	0.0265159	0.00726162	0.000261081	0.369952	0.102861	0.00703678	3.00386e-48	4.25647e-45	0.0017094	0.00538823	0.751058	1
CTHRC1;Collagen triple helix repeat-containing protein 1	CTHRC1	Q96CG8	-0.0542918	0.00625218	3.99405e-18	5.65956e-15	0.0529431	0.00605859	2.46401e-18	3.4915e-15	0.00443035	0.00463921	0.339594	1
CTLA4;Cytotoxic T-lymphocyte protein 4	CTLA4	P16410	0.00810573	0.00732939	0.268768	1	2.45787e-05	0.00710245	0.997239	1	-0.00754536	0.00543852	0.165331	1
CTNNA1;Catenin alpha-1	CTNNA1	P35221	0.0128043	0.00732219	0.0803509	1	-0.0140734	0.00709547	0.0473268	1	0.00272649	0.00543317	0.615795	1
CTRB1;Chymotrypsinogen B	CTRB1	P17538	-0.0214143	0.00726702	0.00321307	1	0.10411	0.00704201	2.60578e-49	3.69239e-46	0.0132944	0.00539223	0.013688	1
CTRC;Chymotrypsin-C	CTRC	Q99895	0.049882	0.00718551	3.93194e-12	5.57156e-09	-0.00432346	0.00696303	0.534658	1	-0.00332324	0.00533175	0.533097	1
CTRL;Chymotrypsin-like protease CTRL-1	CTRL	P40313	0.00904029	0.00715675	0.206531	1	-0.0383903	0.00693515	3.12362e-08	4.42617e-05	0.00589408	0.00531041	0.267046	1
CTSB;Cathepsin B	CTSB	P07858	0.0122651	0.00690724	0.075793	1	-0.0603907	0.00669337	1.92972e-19	2.73441e-16	-0.0216974	0.00512528	2.30753e-05	0.0326977
CTSC;Dipeptidyl peptidase 1	CTSC	P53634	-0.0335041	0.00709285	2.32548e-06	0.0032952	0.0735603	0.00687323	1.08964e-26	1.54402e-23	-0.0272156	0.005263	2.33971e-07	0.000331537
CTSD;Cathepsin D	CTSD	P07339	-0.0681119	0.00659655	5.87219e-25	8.3209e-22	0.173859	0.0063923	3.16609e-161	4.48636e-158	-0.0165825	0.00489474	0.000705278	0.999379
CTSE;Cathepsin E	CTSE	P14091	-0.0918995	0.00714484	8.91787e-38	1.26366e-34	0.183361	0.00692362	4.75911e-153	6.74365e-150	-0.00319942	0.00530158	0.54619	1
CTSF;Cathepsin F	CTSF	Q9UBX1	-0.00695825	0.00701182	0.321029	1	0.0950472	0.00679472	2.41176e-44	3.41746e-41	0.0041697	0.00520288	0.422892	1
CTSH;Pro-cathepsin H	CTSH	P09668	0.0153257	0.00706164	0.0299925	1	0.0463604	0.006843	1.26476e-11	1.79216e-08	8.20216e-05	0.00523984	0.987511	1
CTSL;Cathepsin L1	CTSL	P07711	-0.0108768	0.0070222	0.121412	1	0.107376	0.00680477	6.69472e-56	9.48641e-53	0.0123244	0.00521057	0.0180221	1
CTSO;Cathepsin O	CTSO	P43234	-0.0497441	0.00684829	3.8434e-13	5.4461e-10	0.1494	0.00663624	1.90533e-111	2.69985e-108	-0.0154012	0.00508153	0.00244061	1
CTSS;Cathepsin S	CTSS	P25774	-0.0429371	0.00697158	7.40512e-10	1.04931e-06	0.148774	0.00675572	9.34244e-107	1.32382e-103	-0.00246048	0.00517302	0.634336	1
CTSV;Cathepsin L2	CTSV	O60911	0.0565151	0.00685148	1.65755e-16	2.34876e-13	-0.00329162	0.00663934	0.620056	1	-0.00563124	0.0050839	0.268015	1
CTSZ;Cathepsin Z	CTSZ	Q9UBR2	-0.0647476	0.00687615	4.94765e-21	7.01082e-18	0.113367	0.00666324	1.17639e-64	1.66694e-61	-0.0171977	0.0051022	0.000750747	1
CUZD1;CUB and zona pellucida-like domain-containing protein 1	CUZD1	Q86UP6	0.0117352	0.00731417	0.108625	1	0.00598381	0.00708771	0.398534	1	-0.00325938	0.00542722	0.548136	1
CWC15;Spliceosome-associated protein CWC15 homolog	CWC15	Q9P013	-0.0394705	0.00725077	5.25541e-08	7.44692e-05	0.0869203	0.00702626	4.44854e-35	6.30358e-32	-0.00222407	0.00538018	0.679329	1
CX3CL1;Fractalkine	CX3CL1	P78423	-0.0154167	0.00718694	0.0319515	1	-0.0474053	0.00696441	1.01391e-11	1.43671e-08	-0.00108649	0.00533281	0.83856	1
CXADR;Coxsackievirus and adenovirus receptor	CXADR	P78310	-0.0686288	0.00721758	2.05073e-21	2.90588e-18	0.111277	0.0069941	8.50117e-57	1.20462e-53	0.000363237	0.00535555	0.945926	1
CXCL1;Growth-regulated alpha protein	CXCL1	P09341	0.018267	0.00716971	0.0108445	1	0.0904333	0.00694772	1.21438e-38	1.72078e-35	0.0141233	0.00532003	0.00794046	1
CXCL10;C-X-C motif chemokine 10	CXCL10	P02778	-0.00980287	0.00684302	0.152	1	0.154814	0.00663115	1.21264e-119	1.71832e-116	0.0196783	0.00507763	0.000106606	0.15106
CXCL11;C-X-C motif chemokine 11	CXCL11	O14625	-0.0573974	0.00715385	1.06106e-15	1.50352e-12	0.12844	0.00693234	2.84794e-76	4.03553e-73	0.0131433	0.00530826	0.0132908	1
CXCL12;Stromal cell-derived factor 1	CXCL12	P48061	-0.0101268	0.00720226	0.159717	1	0.0479997	0.00697925	6.19333e-12	8.77594e-09	0.0138923	0.00534418	0.00933913	1
CXCL13;C-X-C motif chemokine 13	CXCL13	O43927	-0.0732834	0.00710961	7.05874e-25	1.00022e-21	0.235088	0.00688948	4.19185e-251	5.93985e-248	0.0489272	0.00527544	1.88218e-20	2.66705e-17
CXCL14;C-X-C motif chemokine 14	CXCL14	O95715	-0.00175545	0.00688907	0.798867	1	0.0242629	0.00667577	0.000278937	0.395254	0.00286239	0.00511179	0.575512	1
CXCL16;C-X-C motif chemokine 16	CXCL16	Q9H2A7	0.0458777	0.00684772	2.11984e-11	3.00381e-08	0.0975097	0.0066357	9.71673e-49	1.37686e-45	0.0169725	0.00508111	0.000837682	1
CXCL17;C-X-C motif chemokine 17	CXCL17	Q6UXB2	0.0352867	0.0055855	2.68894e-10	3.81023e-07	0.128838	0.00541256	2.94528e-124	4.17346e-121	0.014456	0.00414452	0.000487304	0.69051
CXCL3;C-X-C motif chemokine 3	CXCL3	P19876	0.0586614	0.00722025	4.63501e-16	6.5678e-13	0.105491	0.00699669	3.30585e-51	4.6844e-48	0.0124587	0.00535753	0.0200535	1
CXCL5;C-X-C motif chemokine 5	CXCL5	P42830	0.0466872	0.00698844	2.41446e-11	3.42129e-08	0.13193	0.00677206	4.37357e-84	6.19735e-81	0.0128867	0.00518553	0.0129553	1
CXCL6;C-X-C motif chemokine 6	CXCL6	P80162	0.009338	0.00706749	0.186423	1	0.221946	0.00684866	4.73143e-227	6.70444e-224	0.0154428	0.00524418	0.00323434	1
CXCL8;Interleukin-8	CXCL8	P10145	-0.00476897	0.00717882	0.506496	1	0.0683586	0.00695655	9.25945e-23	1.31206e-19	0.000761818	0.00532679	0.886278	1
CXCL9;C-X-C motif chemokine 9	CXCL9	Q07325	-0.0642185	0.00683482	6.00856e-21	8.51413e-18	0.0711176	0.00662319	7.45424e-27	1.05627e-23	0.01153	0.00507154	0.0230034	1
CYB5A;Cytochrome b5	CYB5A	P00167	-0.00189346	0.00732526	0.796035	1	0.0140056	0.00709845	0.0484971	1	-0.00395045	0.00543545	0.467358	1
CYB5R2;NADH-cytochrome b5 reductase 2	CYB5R2	Q6BCY4	0.0303491	0.0071669	2.29518e-05	0.0325227	0.0787475	0.00694499	9.49841e-30	1.34592e-26	-0.00653816	0.00531795	0.218911	1
CYP24A1;1,25-dihydroxyvitamin D(3) 24-hydroxylase, mitochondrial	CYP24A1	Q07973	-0.00470515	0.00732935	0.520903	1	-0.00144818	0.00710241	0.838433	1	-0.00580947	0.00543848	0.285431	1
CYTH3;Cytohesin-3	CYTH3	O43739	-0.00608285	0.00731666	0.40577	1	0.000209194	0.00709012	0.976462	1	-0.00334255	0.00542907	0.538112	1
CYTL1;Cytokine-like protein 1	CYTL1	Q9NRR1	0.0517187	0.00692811	8.51829e-14	1.20704e-10	0.0219554	0.00671359	0.00107539	1	-0.000369551	0.00514076	0.942693	1
DAAM1;Disheveled-associated activator of morphogenesis 1	DAAM1	Q9Y4D1	0.0153245	0.00718342	0.0329062	1	0.167382	0.006961	9.74245e-127	1.38051e-123	0.0111708	0.00533021	0.0361106	1
DAB2;Disabled homolog 2	DAB2	P98082	0.018913	0.00722156	0.00882338	1	0.138546	0.00699796	9.17374e-87	1.29992e-83	0.00498077	0.00535851	0.352633	1
DAG1;Dystroglycan	DAG1	Q14118	0.0141065	0.00712887	0.0478484	1	0.12856	0.00690814	6.23911e-77	8.84082e-74	-0.00261973	0.00528972	0.620428	1
DAND5;DAN domain family member 5	DAND5	Q8N907	0.0135971	0.00732898	0.0635689	1	-0.00522477	0.00710206	0.461937	1	-0.00498965	0.00543821	0.358879	1
DAPK2;Death-associated protein kinase 2	DAPK2	Q9UIK4	0.00198777	0.00727142	0.784573	1	0.0826144	0.00704628	1.09274e-31	1.54841e-28	-0.00386943	0.0053955	0.473281	1
DAPP1;Dual adapter for phosphotyrosine and 3-phosphotyrosine and 3-phosphoinositide	DAPP1	Q9UN19	0.0344222	0.00729286	2.36757e-06	0.00335485	0.0725854	0.00706705	1.03205e-24	1.46242e-21	-0.00785353	0.00541141	0.146708	1
DARS1;Aspartate--tRNA ligase, cytoplasmic	DARS1	P14868	0.0176127	0.00729093	0.0157104	1	0.0659461	0.00706519	1.07759e-20	1.52695e-17	-0.00788411	0.00540998	0.145035	1
DBH;Dopamine beta-hydroxylase	DBH	P09172	0.023974	0.00724116	0.00093123	1	-0.00987034	0.00701695	0.159542	1	0.00163047	0.00537305	0.761546	1
DBI;Acyl-CoA-binding protein	DBI	P07108	0.0222664	0.00721901	0.0020411	1	0.0859673	0.00699549	1.22266e-34	1.73251e-31	0.00222568	0.00535662	0.677777	1
DBN1;Drebrin	DBN1	Q16643	0.0232136	0.00728376	0.00143866	1	0.0839787	0.00705823	1.39987e-32	1.98362e-29	0.00439953	0.00540465	0.415635	1
DBNL;Drebrin-like protein	DBNL	Q9UJU6	0.0281351	0.0072489	0.000104088	0.147493	0.113133	0.00702445	3.75571e-58	5.32184e-55	-0.000342984	0.00537879	0.949157	1
DCBLD2;Discoidin, CUB and LCCL domain-containing protein 2	DCBLD2	Q96PD2	-0.0978263	0.00682912	2.06599e-46	2.92751e-43	0.0513403	0.00661767	8.85516e-15	1.25478e-11	0.00461922	0.00506731	0.362	1
DCC;Netrin receptor DCC	DCC	P43146	0.00093854	0.00723659	0.89681	1	0.00861596	0.00701253	0.21921	1	-0.00914654	0.00536966	0.0885067	1
DCDC2C;Doublecortin domain-containing protein 2C	DCDC2C	A8MYV0	-0.00835869	0.00732816	0.254033	1	0.00677411	0.00710126	0.340125	1	0.000687656	0.0054376	0.899366	1
DCLRE1C;Protein artemis	DCLRE1C	Q96SD1	0.00871972	0.00732886	0.234141	1	-0.00538371	0.00710193	0.448418	1	-0.00045	0.00543812	0.934051	1
DCN;Decorin	DCN	P07585	0.0221435	0.0068273	0.00118232	1	-0.0276713	0.0066159	2.88963e-05	0.0409461	-0.00866724	0.00506595	0.087112	1
DCTD;Deoxycytidylate deaminase	DCTD	P32321	0.0321988	0.00727675	9.67792e-06	0.0137136	0.0844628	0.00705144	5.36496e-33	7.60215e-30	0.00322064	0.00539946	0.550862	1
DCTN1;Dynactin subunit 1	DCTN1	Q14203	-0.0148489	0.00721341	0.0395481	1	0.163483	0.00699007	4.67276e-120	6.6213e-117	0.0118473	0.00535246	0.0268745	1
DCTN2;Dynactin subunit 2	DCTN2	Q13561	-0.000380357	0.00731484	0.958531	1	0.0478397	0.00708835	1.51117e-11	2.14133e-08	-0.0212355	0.00542772	9.15523e-05	0.12973
DCTN6;Dynactin subunit 6	DCTN6	O00399	0.00133421	0.00728783	0.854742	1	0.084865	0.00706218	3.36637e-33	4.77015e-30	-0.00445462	0.00540768	0.410083	1
DCTPP1;dCTP pyrophosphatase 1	DCTPP1	Q9H773	-0.004862	0.00708616	0.492638	1	0.0381166	0.00686675	2.86266e-08	4.05639e-05	0.00189598	0.00525804	0.71841	1
DCUN1D1;DCN1-like protein 1	DCUN1D1	Q96GG9	-0.0106673	0.00731232	0.144626	1	-0.00891221	0.00708591	0.208495	1	-0.00263374	0.00542585	0.627392	1
DCUN1D2;DCN1-like protein 2	DCUN1D2	Q6PH85	-0.000843585	0.00732048	0.908258	1	-0.0067525	0.00709382	0.341162	1	0.000614942	0.00543191	0.909865	1
DCXR;L-xylulose reductase	DCXR	Q7Z4W1	0.049582	0.0065412	3.54144e-14	5.01822e-11	0.138508	0.00633867	3.77442e-105	5.34836e-102	-0.0308239	0.00485367	2.17045e-10	3.07552e-07
DDA1;DET1- and DDB1-associated protein 1	DDA1	Q9BW61	-0.00444977	0.00732493	0.543534	1	0.0365089	0.00709813	2.71181e-07	0.000384263	0.00233699	0.00543521	0.667219	1
DDAH1;N(G),N(G)-dimethylarginine dimethylaminohydrolase 1	DDAH1	O94760	-0.0077768	0.0070525	0.270164	1	0.149817	0.00683413	8.19241e-106	1.16086e-102	-0.0124454	0.00523306	0.0174013	1
DDC;Aromatic-L-amino-acid decarboxylase	DDC	P20711	-0.0338342	0.0071573	2.28471e-06	0.00323743	-0.00875087	0.00693569	0.207059	1	0.00123558	0.00531082	0.816032	1
DDHD2;Phospholipase DDHD2	DDHD2	O94830	0.028961	0.00723443	6.26135e-05	0.0887233	0.111357	0.00701043	1.27697e-56	1.80947e-53	-0.00235922	0.00536806	0.660307	1
DDI2;Protein DDI1 homolog 2	DDI2	Q5TDH0	-0.0179966	0.00720025	0.0124436	1	0.0763113	0.00697731	8.4949e-28	1.20373e-24	-0.00312059	0.00534269	0.559166	1
DDR1;Epithelial discoidin domain-containing receptor 1	DDR1	Q08345	-0.0474198	0.00715343	3.42915e-11	4.85911e-08	0.0601489	0.00693194	4.23191e-18	5.99662e-15	-0.0154763	0.00530795	0.00355124	1
DDT;D-dopachrome decarboxylase	DDT	P30046	-0.0105665	0.00700015	0.131189	1	0.14302	0.00678341	4.53024e-98	6.41935e-95	0.00539029	0.00519422	0.299395	1
DDX1;ATP-dependent RNA helicase DDX1	DDX1	Q92499	-0.0249296	0.00731338	0.000653317	0.92575	0.0228252	0.00708694	0.00127977	1	0.00170732	0.00542664	0.753053	1
DDX25;ATP-dependent RNA helicase DDX25	DDX25	Q9UHL0	-0.00925189	0.00730934	0.205606	1	-0.0241171	0.00708302	0.000662569	0.93886	-0.0050108	0.00542364	0.355554	1
DDX39A;ATP-dependent RNA helicase DDX39A	DDX39A	O00148	-0.00502345	0.007328	0.493024	1	0.00895439	0.0071011	0.207322	1	-0.0149343	0.00543748	0.0060258	1
DDX4;Probable ATP-dependent RNA helicase DDX4	DDX4	Q9NQI0	-0.00317069	0.00732344	0.665053	1	0.00738963	0.00709668	0.297753	1	-0.00942645	0.0054341	0.0828054	1
DDX53;Probable ATP-dependent RNA helicase DDX53	DDX53	Q86TM3	0.00583777	0.00732762	0.425642	1	0.00259904	0.00710074	0.714349	1	-0.00377725	0.0054372	0.487245	1
DDX58;Antiviral innate immune response receptor RIG-I	RIGI	O95786	-0.0393723	0.00727059	6.15902e-08	8.72733e-05	0.101867	0.00704547	3.02816e-47	4.2909e-44	-0.012782	0.00539488	0.0178275	1
DECR1;2,4-dienoyl-CoA reductase, mitochondrial	DECR1	Q16698	0.00981467	0.00724326	0.175424	1	0.116423	0.00701899	1.48591e-61	2.10554e-58	0.00382569	0.00537461	0.476588	1
DEFA1_DEFA1B;Neutrophil defensin 1	DEFA1	P59665	-0.0710744	0.00717417	4.16134e-23	5.89662e-20	0.0655923	0.00695204	4.14174e-21	5.86885e-18	0.0194292	0.00532334	0.00026281	0.372401
DEFB103A_DEFB103B;Beta-defensin 103	DEFB103A	P81534	-0.000444848	0.00727788	0.951261	1	0.0804783	0.00705254	4.14982e-30	5.88029e-27	0.00284991	0.00540029	0.597689	1
DEFB104A_DEFB104B;Beta-defensin 104	DEFB104A	Q8WTQ1	0.0120712	0.00701536	0.0853163	1	0.0126401	0.00679814	0.0629868	1	-0.00233712	0.0052055	0.653455	1
DEFB116;Beta-defensin 116	DEFB116	Q30KQ4	-0.00618647	0.00732287	0.39822	1	0.0017454	0.00709614	0.805711	1	-0.00564313	0.00543368	0.299023	1
DEFB118;Beta-defensin 118	DEFB118	Q96PH6	0.0044493	0.00732884	0.543792	1	0.0114824	0.00710192	0.105929	1	-0.0018764	0.00543811	0.730061	1
DEFB4A_DEFB4B;Beta-defensin 4A	DEFB4A	O15263	-0.048826	0.006588	1.27807e-13	1.81102e-10	0.274514	0.00638401	0	0	0.0541522	0.00488839	1.79344e-28	2.5413e-25
DENND2B;DENN domain-containing protein 2B	DENND2B	P78524	-0.00902784	0.00732664	0.217885	1	0.000383092	0.00709979	0.956969	1	0.00977825	0.00543648	0.0720846	1
DENR;Density-regulated protein	DENR	O43583	-0.000516185	0.0072861	0.943521	1	0.0992183	0.0070605	9.81132e-45	1.39026e-41	-0.0157866	0.0054064	0.00350275	1
DFFA;DNA fragmentation factor subunit alpha	DFFA	O00273	0.000557983	0.0072567	0.93871	1	0.113109	0.00703201	5.24298e-58	7.42931e-55	-0.00367799	0.00538458	0.494574	1
DGCR6;Protein DGCR6	DGCR6	Q14129	-0.025787	0.00729312	0.000407059	0.576803	0.0867961	0.0070673	1.34246e-34	1.90226e-31	0.015144	0.0054116	0.00513794	1
DGKA;Diacylglycerol kinase alpha	DGKA	P23743	0.00847617	0.00722294	0.240601	1	0.138926	0.0069993	3.39681e-87	4.81327e-84	0.00685802	0.00535953	0.200697	1
DGKZ;Diacylglycerol kinase zeta	DGKZ	Q13574	-0.00990631	0.00730932	0.175331	1	0.071428	0.007083	6.97583e-24	9.88474e-21	-0.00697626	0.00542362	0.198356	1
DHODH;Dihydroorotate dehydrogenase	DHODH	Q02127	-0.0086964	0.00732732	0.235296	1	0.0147705	0.00710045	0.0375121	1	-0.00364742	0.00543698	0.502318	1
DHPS;Deoxyhypusine synthase	DHPS	P49366	-0.0290843	0.00722719	5.72657e-05	0.0811455	0.0907262	0.00700342	2.70806e-38	3.83732e-35	-0.010306	0.00536268	0.0546402	1
DHRS4L2;Dehydrogenase/reductase SDR family member 4-like 2	DHRS4L2	Q6PKH6	0.00435155	0.00729108	0.550623	1	0.0770753	0.00706533	1.15665e-27	1.63897e-24	-0.00709061	0.00541009	0.189992	1
DIABLO;Diablo homolog, mitochondrial	DIABLO	Q9NR28	0.055109	0.00724872	2.9747e-14	4.21516e-11	0.0966904	0.00702428	5.33608e-43	7.56123e-40	0.00577652	0.00537866	0.282843	1
DIPK1C;Divergent protein kinase domain 1C	DIPK1C	Q0P6D2	0.00382777	0.00732313	0.601189	1	0.00138609	0.00709639	0.845141	1	-0.00437292	0.00543387	0.420968	1
DIPK2B;Divergent protein kinase domain 2B	DIPK2B	Q9H7Y0	0.0417441	0.00691586	1.59566e-09	2.26105e-06	0.026184	0.00670173	9.36042e-05	0.132637	0.0192719	0.00513167	0.000173282	0.24554
DKK1;Dickkopf-related protein 1	DKK1	O94907	0.0067708	0.00711692	0.341425	1	0.187335	0.00689656	7.96749e-161	1.12899e-157	0.0129354	0.00528086	0.0143105	1
DKK3;Dickkopf-related protein 3	DKK3	Q9UBP4	0.016826	0.00686401	0.0142376	1	-0.0449608	0.00665148	1.4061e-11	1.99244e-08	0.00159389	0.0050932	0.754325	1
DKK4;Dickkopf-related protein 4	DKK4	Q9UBT3	-0.0166662	0.00702293	0.0176445	1	0.12217	0.00680548	9.71919e-72	1.37721e-68	0.00690804	0.00521112	0.18497	1
DKKL1;Dickkopf-like protein 1	DKKL1	Q9UK85	0.0257565	0.00711836	0.000296937	0.420759	-0.0204161	0.00689795	0.00308104	1	-0.00242776	0.00528193	0.645781	1
DLG4;Disks large homolog 4	DLG4	P78352	0.00845302	0.00727735	0.245426	1	0.10201	0.00705203	2.7386e-47	3.88059e-44	-0.00544621	0.0053999	0.313185	1
DLGAP5;Disks large-associated protein 5	DLGAP5	Q15398	-0.00288594	0.00732647	0.693652	1	0.0046435	0.00709962	0.513084	1	-0.00673951	0.00543635	0.21509	1
DLK1;Protein delta homolog 1	DLK1	P80370	0.00967037	0.00692869	0.162814	1	0.118012	0.00671416	7.33543e-69	1.03943e-65	-0.00373749	0.00514119	0.467249	1
DLL1;Delta-like protein 1	DLL1	O00548	-0.0808917	0.00695588	3.33718e-31	4.72879e-28	0.0362443	0.00674051	7.61841e-08	0.000107953	0.0335538	0.00516137	8.08766e-11	1.14602e-07
DLL4;Delta-like protein 4	DLL4	Q9NR61	0.0113858	0.00731493	0.119594	1	0.0261077	0.00708844	0.000230723	0.326934	0.00464574	0.00542779	0.392049	1
DMD;Dystrophin	DMD	P11532	-0.0102878	0.00723642	0.155131	1	0.0771518	0.00701236	4.14122e-28	5.8681e-25	0.00764112	0.00536953	0.15473	1
DMP1;Dentin matrix acidic phosphoprotein 1	DMP1	Q13316	0.0579217	0.00695819	8.78889e-17	1.24539e-13	-0.103071	0.00674274	1.39349e-52	1.97458e-49	-0.00416797	0.00516308	0.419519	1
DNAJA1;DnaJ homolog subfamily A member 1	DNAJA1	P31689	0.0034714	0.00732833	0.635719	1	-0.00995022	0.00710142	0.161176	1	-0.00903112	0.00543773	0.0967574	1
DNAJA2;DnaJ homolog subfamily A member 2	DNAJA2	O60884	0.000338455	0.00717462	0.962375	1	0.170314	0.00695247	2.00581e-131	2.84224e-128	0.0103244	0.00532367	0.0524671	1
DNAJA4;DnaJ homolog subfamily A member 4	DNAJA4	Q8WW22	-0.0268743	0.00726326	0.000215892	0.305919	0.0671427	0.00703837	1.52339e-21	2.15864e-18	-0.00602719	0.00538944	0.263433	1
DNAJB1;DnaJ homolog subfamily B member 1	DNAJB1	P25685	-0.011165	0.00698301	0.109856	1	0.26417	0.00676679	0	0	0.0174272	0.0051815	0.000770814	1
DNAJB14;DnaJ homolog subfamily B member 14	DNAJB14	Q8TBM8	0.0113571	0.00725238	0.117362	1	0.10002	0.00702783	7.77853e-46	1.10222e-42	0.00355438	0.00538138	0.508939	1
DNAJB2;DnaJ homolog subfamily B member 2	DNAJB2	P25686	-0.000359063	0.00715223	0.959961	1	0.144586	0.00693078	4.57751e-96	6.48633e-93	-0.00880653	0.00530706	0.0970446	1
DNAJB6;DnaJ homolog subfamily B member 6	DNAJB6	O75190	0.029126	0.00721925	5.48355e-05	0.0777019	0.137234	0.00699572	3.16635e-85	4.48672e-82	0.00019928	0.00535679	0.970325	1
DNAJB8;DnaJ homolog subfamily B member 8	DNAJB8	Q8NHS0	0.0181611	0.0073073	0.0129475	1	0.0545881	0.00708104	1.30077e-14	1.84319e-11	0.000670975	0.00542212	0.901516	1
DNAJC21;DnaJ homolog subfamily C member 21	DNAJC21	Q5F1R6	0.00627641	0.00729675	0.389704	1	0.0780397	0.00707083	2.82323e-28	4.00052e-25	-0.00657173	0.0054143	0.224843	1
DNAJC6;Putative tyrosine-protein phosphatase auxilin	DNAJC6	O75061	-0.0193103	0.00713717	0.00682135	1	0.20293	0.00691619	5.50887e-187	7.80607e-184	0.00888794	0.00529589	0.0933029	1
DNAJC9;DnaJ homolog subfamily C member 9	DNAJC9	Q8WXX5	0.0131168	0.00718698	0.0679976	1	0.114708	0.00696445	1.00866e-60	1.42928e-57	0.00104141	0.00533285	0.845174	1
DNER;Delta and Notch-like epidermal growth factor-related receptor	DNER	Q8NFT8	0.152402	0.00676955	1.89798e-111	2.68943e-108	-0.0178583	0.00655994	0.00648567	1	0.0111402	0.00502311	0.0265756	1
DNLZ;DNL-type zinc finger protein	DNLZ	Q5SXM8	-0.00354018	0.00731339	0.62834	1	-0.013283	0.00708695	0.0608987	1	0.0032222	0.00542664	0.552667	1
DNM1;Dynamin-1	DNM1	Q05193	0.0501537	0.00726829	5.27532e-12	7.47512e-09	0.0565532	0.00704324	1.00942e-15	1.43034e-12	0.0125653	0.00539318	0.0198199	1
DNM3;Dynamin-3	DNM3	Q9UQ16	-0.0154304	0.00717783	0.0315833	1	0.122077	0.00695558	1.14731e-68	1.62574e-65	0.00582871	0.00532605	0.273797	1
DNMBP;Dynamin-binding protein	DNMBP	Q6XZF7	0.0149533	0.00720074	0.0378421	1	0.120995	0.00697779	4.45296e-67	6.30984e-64	0.00895397	0.00534306	0.0937836	1
DNPEP;Aspartyl aminopeptidase	DNPEP	Q9ULA0	-0.0245677	0.00719265	0.000636988	0.902612	0.0743347	0.00696995	1.6284e-26	2.30744e-23	-0.015111	0.00533705	0.00463789	1
DNPH1;2'-deoxynucleoside 5'-phosphate N-hydrolase 1	DNPH1	O43598	0.00538917	0.0071967	0.45396	1	0.107266	0.00697387	3.26126e-53	4.62121e-50	-0.00109243	0.00534006	0.837907	1
DOC2B;Double C2-like domain-containing protein beta	DOC2B	Q14184	0.0143652	0.00732448	0.0498567	1	0.00805227	0.0070977	0.256596	1	0.00208992	0.00543488	0.700581	1
DOCK9;Dedicator of cytokinesis protein 9	DOCK9	Q9BZ29	-0.00449309	0.00731905	0.539292	1	0.0133135	0.00709243	0.0605059	1	0.00423583	0.00543084	0.435421	1
DOK1;Docking protein 1	DOK1	Q99704	0.0393458	0.00727114	6.30001e-08	8.92711e-05	0.0936861	0.007046	3.03901e-40	4.30628e-37	-0.00461684	0.00539529	0.39216	1
DOK2;Docking protein 2	DOK2	O60496	0.0237634	0.00722172	0.00100093	1	0.135087	0.00699811	1.34581e-82	1.90701e-79	0.00558821	0.00535862	0.297027	1
DPEP1;Dipeptidase 1	DPEP1	P16444	0.0212924	0.00711721	0.00277633	1	-0.0366943	0.00689684	1.04139e-07	0.000147566	-0.0059729	0.00528107	0.258062	1
DPEP2;Dipeptidase 2	DPEP2	Q9H4A9	0.0222366	0.00725955	0.00219238	1	0.0273932	0.00703478	9.87974e-05	0.139996	0.0130922	0.00538669	0.0150843	1
DPP10;Inactive dipeptidyl peptidase 10	DPP10	Q8N608	0.0530264	0.0069862	3.27352e-14	4.63858e-11	0.000904527	0.00676989	0.893711	1	-0.0111669	0.00518386	0.0312339	1
DPP4;Dipeptidyl peptidase 4	DPP4	P27487	0.177367	0.00710522	2.37106e-136	3.35979e-133	0.0169165	0.00688523	0.0140182	1	-0.00344695	0.00527218	0.513246	1
DPP6;Dipeptidyl aminopeptidase-like protein 6	DPP6	P42658	0.0588247	0.00669233	1.5637e-18	2.21577e-15	-0.040712	0.00648512	3.4749e-10	4.92393e-07	-0.00684418	0.00496581	0.168131	1
DPP7;Dipeptidyl peptidase 2	DPP7	Q9UHL4	-0.0245554	0.00719229	0.000640573	0.907692	0.0596945	0.0069696	1.12401e-17	1.59273e-14	-0.00368374	0.00533679	0.490039	1
DPT;Dermatopontin	DPT	Q07507	0.0594406	0.00629876	4.06807e-21	5.76445e-18	0.0533303	0.00610374	2.49025e-18	3.52868e-15	0.0196087	0.00467378	2.72963e-05	0.0386789
DPY30;Protein dpy-30 homolog	DPY30	Q9C005	-0.0410791	0.00692664	3.04632e-09	4.31663e-06	0.204155	0.00671217	1.34734e-200	1.90919e-197	0.00902983	0.00513967	0.0789451	1
DRAXIN;Draxin	DRAXIN	Q8NBI3	-0.0283548	0.00710123	6.53895e-05	0.092657	0.0416353	0.00688136	1.45889e-09	2.06725e-06	0.0059159	0.00526922	0.261561	1
DRG2;Developmentally-regulated GTP-binding protein 2	DRG2	P55039	0.028557	0.00726928	8.56579e-05	0.121377	0.0983687	0.0070442	3.36815e-44	4.77267e-41	-0.00224651	0.00539391	0.677055	1
DSC2;Desmocollin-2	DSC2	Q02487	-0.133336	0.00688148	3.32868e-83	4.71674e-80	0.031023	0.00666841	3.29544e-06	0.00466964	0.0146634	0.00510616	0.00408506	1
DSCAM;Down syndrome cell adhesion molecule	DSCAM	O60469	-0.00845445	0.00716267	0.237869	1	0.0787729	0.0069409	8.44157e-30	1.19617e-26	-0.00897804	0.00531481	0.0911806	1
DSG2;Desmoglein-2	DSG2	Q14126	0.00226507	0.00680655	0.739304	1	-0.212627	0.0065958	1.0045e-224	1.42338e-221	0.00326102	0.00505056	0.518494	1
DSG3;Desmoglein-3	DSG3	P32926	-0.000878472	0.00687689	0.898353	1	0.0127817	0.00666396	0.0551156	1	-0.010411	0.00510276	0.0413302	1
DSG4;Desmoglein-4	DSG4	Q86SJ6	0.0391904	0.00698806	2.0598e-08	2.91874e-05	0.00907709	0.00677169	0.180109	1	-0.00283569	0.00518525	0.584467	1
DTD1;D-aminoacyl-tRNA deacylase 1	DTD1	Q8TEA8	0.0301449	0.00726967	3.38131e-05	0.0479131	0.0906472	0.00704458	8.32786e-38	1.18006e-34	-0.002649	0.0053942	0.62337	1
DTNB;Dystrobrevin beta	DTNB	O60941	-0.017803	0.00682497	0.00909742	1	0.106475	0.00661365	4.16062e-58	5.8956e-55	0.00391759	0.00506423	0.439184	1
DTX2;Probable E3 ubiquitin-protein ligase DTX2	DTX2	Q86UW9	0.0138101	0.00728841	0.0581259	1	-0.0114078	0.00706274	0.106275	1	0.00233045	0.00540811	0.666531	1
DTX3;Probable E3 ubiquitin-protein ligase DTX3	DTX3	Q8N9I9	0.0347437	0.0066727	1.93152e-07	0.000273696	0.0873526	0.00646609	1.74759e-41	2.47634e-38	0.0146999	0.00495124	0.00299042	1
DTYMK;Thymidylate kinase	DTYMK	P23919	0.0129263	0.00703211	0.0660441	1	0.216431	0.00681438	2.70774e-218	3.83687e-215	0.016253	0.00521793	0.00184195	1
DUOX2;Dual oxidase 2	DUOX2	Q9NRD8	-0.00469638	0.00732573	0.521475	1	0.00752934	0.00709891	0.288864	1	-0.00190987	0.0054358	0.725327	1
DUSP13;Dual specificity protein phosphatase 13 isoform A	DUSP13A	Q6B8I1	0.0611372	0.00709267	6.98401e-18	9.89635e-15	0.132985	0.00687306	5.63008e-83	7.97782e-80	0.0223733	0.00526287	2.13208e-05	0.0302116
DUSP29;Dual specificity phosphatase 29	DUSP29	Q68J44	-0.0192628	0.00724756	0.00786803	1	-0.00161105	0.00702316	0.818566	1	-7.58427e-05	0.0053778	0.988748	1
DUSP3;Dual specificity protein phosphatase 3	DUSP3	P51452	0.013459	0.00731807	0.0659023	1	0.0342656	0.00709148	1.35775e-06	0.00192393	-0.000387781	0.00543011	0.943069	1
DUT;Deoxyuridine 5'-triphosphate nucleotidohydrolase, mitochondrial	DUT	P33316	-0.0727518	0.00717158	3.7858e-24	5.36448e-21	0.14336	0.00694953	5.44761e-94	7.71927e-91	0.020351	0.00532142	0.000131339	0.186107
DXO;Decapping and exoribonuclease protein	DXO	O77932	0.0135571	0.00725341	0.0616222	1	0.107743	0.00702883	7.28392e-53	1.03213e-49	-0.00641181	0.00538214	0.233539	1
DYNC1H1;Cytoplasmic dynein 1 heavy chain 1	DYNC1H1	Q14204	-0.0262047	0.00732496	0.000347426	0.492302	0.0378937	0.00709816	9.42866e-08	0.000133604	0.00586235	0.00543523	0.280781	1
DYNLT1;Dynein light chain Tctex-type 1	DYNLT1	P63172	-0.0140371	0.007222	0.0519439	1	0.115294	0.00699839	9.46745e-61	1.34154e-57	0.00770494	0.00535883	0.150499	1
DYNLT3;Dynein light chain Tctex-type 3	DYNLT3	P51808	0.000319072	0.00727759	0.96503	1	0.0843113	0.00705225	7.05873e-33	1.00022e-29	-3.5148e-05	0.00540008	0.994807	1
EBAG9;Receptor-binding cancer antigen expressed on SiSo cells	EBAG9	O00559	-0.00228705	0.00722886	0.751718	1	0.144492	0.00700503	5.66703e-94	8.03018e-91	0.00262522	0.00536392	0.624545	1
EBI3_IL27;Interleukin-27	EBI3_IL27	Q14213_Q8NEV9	-0.0772337	0.00702601	4.61034e-28	6.53285e-25	-0.00295813	0.00680847	0.663944	1	0.0155206	0.0052134	0.00291225	1
ECE1;Endothelin-converting enzyme 1	ECE1	P42892	0.0513744	0.00726884	1.60379e-12	2.27257e-09	0.0289075	0.00704378	4.07025e-05	0.0576755	-0.0110648	0.00539359	0.0402279	1
ECHDC3;Enoyl-CoA hydratase domain-containing protein 3, mitochondrial	ECHDC3	Q96DC8	-0.0190903	0.00707387	0.00696441	1	0.121258	0.00685485	1.01442e-69	1.43744e-66	-0.0143586	0.00524892	0.00623103	1
ECHS1;Enoyl-CoA hydratase, mitochondrial	ECHS1	P30084	-0.0301972	0.00713041	2.29152e-05	0.0324709	0.135627	0.00690964	2.51745e-85	3.56723e-82	0.0079069	0.00529087	0.135069	1
ECI2;Enoyl-CoA delta isomerase 2	ECI2	O75521	-0.0210044	0.00728451	0.00393605	1	0.0923591	0.00705897	5.01581e-39	7.1074e-36	0.0103209	0.00540522	0.0562154	1
ECM1;Extracellular matrix protein 1	ECM1	Q16610	0.0599635	0.00727213	1.69873e-16	2.4071e-13	0.0171212	0.00704696	0.0151211	1	-0.00309224	0.00539603	0.566608	1
ECSCR;Endothelial cell-specific chemotaxis regulator	ECSCR	Q19T08	-0.000538577	0.00732248	0.941368	1	-0.00662585	0.00709575	0.350425	1	-0.0115356	0.00543339	0.0337525	1
EDA2R;Tumor necrosis factor receptor superfamily member 27	EDA2R	Q9HAV5	-0.0368681	0.00581664	2.34986e-10	3.32975e-07	-0.00139201	0.00563654	0.804939	1	0.0107633	0.00431603	0.0126431	1
EDAR;Tumor necrosis factor receptor superfamily member EDAR	EDAR	Q9UNE0	0.0807023	0.00727973	1.63742e-28	2.32023e-25	0.0419598	0.00705433	2.73838e-09	3.88029e-06	-0.0130144	0.00540167	0.0159869	1
EDDM3B;Epididymal secretory protein E3-beta	EDDM3B	P56851	0.0173807	0.00444029	9.08291e-05	0.128705	-3.04051e-05	0.00430281	0.994362	1	-0.00300344	0.00329476	0.361996	1
EDEM2;ER degradation-enhancing alpha-mannosidase-like protein 2	EDEM2	Q9BV94	0.00583107	0.00732653	0.426104	1	0.00221945	0.00709968	0.754577	1	-0.000106173	0.00543639	0.984418	1
EDF1;Endothelial differentiation-related factor 1	EDF1	O60869	-0.00879472	0.00730266	0.228475	1	0.0701254	0.00707655	4.05644e-23	5.74797e-20	-0.000379997	0.00541868	0.944093	1
EDIL3;EGF-like repeat and discoidin I-like domain-containing protein 3	EDIL3	O43854	0.00765577	0.00675577	0.25713	1	0.04628	0.00654659	1.58583e-12	2.24712e-09	0.011905	0.00501288	0.0175601	1
EDN1;Endothelin-1	EDN1	P05305	-0.020526	0.00687928	0.00284936	1	0.0571541	0.00666627	1.04299e-17	1.47791e-14	0.0120435	0.00510452	0.0183113	1
EDNRB;Endothelin receptor type B	EDNRB	P24530	0.0083435	0.00732276	0.254547	1	0.00682557	0.00709603	0.336114	1	-0.00715106	0.0054336	0.188155	1
EEF1D;Elongation factor 1-delta	EEF1D	P29692	0.00267814	0.00712113	0.706856	1	0.199526	0.00690064	1.0543e-181	1.49394e-178	0.0216986	0.00528398	4.02625e-05	0.057052
EFCAB14;EF-hand calcium-binding domain-containing protein 14	EFCAB14	O75071	-0.0356502	0.00687052	2.12752e-07	0.00030147	0.184043	0.00665779	2.01516e-166	2.85549e-163	0.00260192	0.00509803	0.60979	1
EFCAB2;Dynein regulatory complex protein 8	EFCAB2	Q5VUJ9	0.00990209	0.00729517	0.174679	1	0.0681564	0.00706929	5.70105e-22	8.07838e-19	-0.000968678	0.00541312	0.857978	1
EFEMP1;EGF-containing fibulin-like extracellular matrix protein 1	EFEMP1	Q12805	-0.0153327	0.00644969	0.0174464	1	-0.0809236	0.00624999	2.95657e-38	4.18946e-35	0.0102609	0.00478577	0.0320355	1
EFHD1;EF-hand domain-containing protein D1	EFHD1	Q9BUP0	0.0316565	0.00689426	4.41135e-06	0.00625088	0.0176301	0.00668079	0.00832057	1	-0.00205527	0.00511564	0.687862	1
EFNA1;Ephrin-A1	EFNA1	P20827	-0.00982841	0.00692483	0.15582	1	0.0367769	0.00671042	4.26846e-08	6.04841e-05	0.0137085	0.00513832	0.00763651	1
EFNA4;Ephrin-A4	EFNA4	P52798	-0.0694448	0.00677772	1.3349e-24	1.89156e-21	0.110426	0.00656786	3.45296e-63	4.89285e-60	0.00303661	0.00502917	0.545981	1
EFNB2;Ephrin-B2	EFNB2	P52799	-0.0227261	0.00731324	0.00188807	1	0.00707892	0.0070868	0.317856	1	0.0015314	0.00542653	0.777787	1
EGF;Pro-epidermal growth factor	EGF	P01133	0.0274108	0.0072604	0.000160019	0.226746	0.104286	0.00703559	1.47674e-49	2.09254e-46	-0.00115017	0.00538732	0.830941	1
EGFL7;Epidermal growth factor-like protein 7	EGFL7	Q9UHF1	-0.0275151	0.00699977	8.48057e-05	0.12017	0.118303	0.00678304	7.77664e-68	1.10195e-64	0.0101914	0.00519393	0.0497498	1
EGFLAM;Pikachurin	EGFLAM	Q63HQ2	-0.0231258	0.00722493	0.00137153	1	0.0707355	0.00700123	5.75829e-24	8.1595e-21	-0.010334	0.00536101	0.0539097	1
EGFR;Epidermal growth factor receptor	EGFR	P00533	0.210579	0.00699093	7.93342e-197	1.12417e-193	-0.0201842	0.00677447	0.00288969	1	0.0104278	0.00518737	0.0444139	1
EGLN1;Egl nine homolog 1	EGLN1	Q9GZT9	-0.0573328	0.0069977	2.63109e-16	3.72825e-13	0.186653	0.00678103	4.83559e-165	6.85203e-162	0.00653946	0.00519239	0.207883	1
EHBP1;EH domain-binding protein 1	EHBP1	Q8NDI1	0.0205047	0.00719258	0.00436332	1	0.159005	0.00696988	2.28688e-114	3.24051e-111	0.00913467	0.005337	0.086984	1
EHD3;EH domain-containing protein 3	EHD3	Q9NZN3	0.0342473	0.00726512	2.43902e-06	0.0034561	0.100925	0.00704017	1.77127e-46	2.5099e-43	0.00648188	0.00539083	0.22922	1
EIF1AX;Eukaryotic translation initiation factor 1A, X-chromosomal	EIF1AX	P47813	-0.0124843	0.00730615	0.0875094	1	0.0275775	0.00707993	9.83145e-05	0.139312	-0.00645921	0.00542127	0.233482	1
EIF2AK2;Interferon-induced, double-stranded RNA-activated protein kinase	EIF2AK2	P19525	-0.00758169	0.00720712	0.29282	1	0.167878	0.00698397	1.17984e-126	1.67183e-123	0.00163294	0.00534779	0.760102	1
EIF2AK3;Eukaryotic translation initiation factor 2-alpha kinase 3	EIF2AK3	Q9NZJ5	0.0328389	0.0072969	6.80456e-06	0.00964206	0.0340262	0.00707097	1.4997e-06	0.00212508	0.00586789	0.00541441	0.278481	1
EIF2S2;Eukaryotic translation initiation factor 2 subunit 2	EIF2S2	P20042	-0.019533	0.00730138	0.0074707	1	0.0800194	0.00707531	1.32185e-29	1.87306e-26	-0.000644544	0.00541773	0.9053	1
EIF4B;Eukaryotic translation initiation factor 4B	EIF4B	P23588	0.0146468	0.00719607	0.0418194	1	0.149797	0.00697326	1.0398e-101	1.4734e-98	-0.00491679	0.00533959	0.357152	1
EIF4E;Eukaryotic translation initiation factor 4E	EIF4E	P06730	0.0159884	0.0072476	0.0273885	1	0.116559	0.00702319	1.27152e-61	1.80174e-58	-0.00282853	0.00537783	0.598919	1
EIF4EBP1;Eukaryotic translation initiation factor 4E-binding protein 1	EIF4EBP1	Q13541	-0.0290522	0.00715626	4.92447e-05	0.0697798	0.131796	0.00693468	3.88578e-80	5.50614e-77	-0.00105139	0.00531005	0.843046	1
EIF4G1;Eukaryotic translation initiation factor 4 gamma 1	EIF4G1	Q04637	0.00191651	0.00719137	0.789855	1	0.149714	0.00696871	9.95472e-102	1.41058e-98	0.0108028	0.00533611	0.0429292	1
EIF4G3;Eukaryotic translation initiation factor 4 gamma 3	EIF4G3	O43432	0.0105477	0.00725046	0.145745	1	0.129948	0.00702597	5.15551e-76	7.30536e-73	0.011485	0.00537995	0.0327858	1
EIF5;Eukaryotic translation initiation factor 5	EIF5	P55010	-0.00940109	0.00731713	0.198869	1	0.0586486	0.00709057	1.3705e-16	1.942e-13	-0.000103433	0.00542942	0.984801	1
EIF5A;Eukaryotic translation initiation factor 5A-1	EIF5A	P63241	0.0116203	0.00732548	0.112682	1	0.00618518	0.00709866	0.383587	1	-0.00832243	0.00543561	0.125755	1
ELAC1;Zinc phosphodiesterase ELAC protein 1	ELAC1	Q9H777	0.0285358	0.00726102	8.51061e-05	0.120595	0.0964569	0.0070362	1.15939e-42	1.64286e-39	-0.00262335	0.00538778	0.626326	1
ELAVL4;ELAV-like protein 4	ELAVL4	P26378	-0.0122458	0.00732438	0.0945475	1	0.0185075	0.00709759	0.00912255	1	0.00268678	0.0054348	0.621051	1
ELN;Elastin	ELN	P15502	-0.0401792	0.00522103	1.44446e-14	2.0468e-11	0.199342	0.00505937	0	0	0.023268	0.00387408	1.91925e-09	2.71957e-06
ELOA;Elongin-A	ELOA	Q14241	-0.0521656	0.00708267	1.80678e-13	2.56021e-10	0.167193	0.00686337	5.38955e-130	7.63699e-127	0.00109759	0.00525544	0.834568	1
ELOB;Elongin-B	ELOB	Q15370	-0.00754558	0.00729166	0.300758	1	0.0875667	0.00706589	3.38176e-35	4.79195e-32	0.00563844	0.00541052	0.297361	1
ENAH;Protein enabled homolog	ENAH	Q8N8S7	-0.00960661	0.00712882	0.177804	1	0.082709	0.00690809	5.71857e-33	8.10322e-30	-0.000292732	0.00528969	0.955868	1
ENDOU;Poly(U)-specific endoribonuclease	ENDOU	P21128	-0.018667	0.00654757	0.00436104	1	0.016405	0.00634484	0.00972574	1	0.000698539	0.00485839	0.885675	1
ENG;Endoglin	ENG	P17813	-0.0145411	0.00718604	0.0430276	1	-0.0036595	0.00696354	0.599223	1	-0.00251082	0.00533215	0.637727	1
ENO1;Alpha-enolase	ENO1	P06733	0.0180455	0.00731472	0.0136293	1	0.0102043	0.00708823	0.149986	1	-0.00654748	0.00542763	0.2277	1
ENO2;Gamma-enolase	ENO2	P09104	0.0353493	0.00728207	1.21334e-06	0.00171931	0.0710177	0.0070566	8.58101e-24	1.21593e-20	-0.00380638	0.00540341	0.481164	1
ENO3;Beta-enolase	ENO3	P13929	0.00811004	0.00653942	0.214918	1	0.203043	0.00633694	4.51809e-222	6.40214e-219	-0.00489026	0.00485235	0.313551	1
ENOPH1;Enolase-phosphatase E1	ENOPH1	Q9UHY7	0.0259327	0.00732235	0.000398252	0.564323	-0.0136402	0.00709563	0.054571	1	-0.00756994	0.00543329	0.163553	1
ENOX2;Ecto-NOX disulfide-thiol exchanger 2	ENOX2	Q16206	-0.0115523	0.00728922	0.113009	1	0.102483	0.00706353	1.46306e-47	2.07316e-44	0.00444636	0.00540871	0.41104	1
ENPEP;Glutamyl aminopeptidase	ENPEP	Q07075	0.0158955	0.00732596	0.0300327	1	0.00149929	0.00709912	0.832737	1	-0.00941539	0.00543597	0.0832728	1
ENPP2;Ectonucleotide pyrophosphatase/phosphodiesterase family member 2	ENPP2	Q13822	-0.00801342	0.00589381	0.173955	1	0.00391269	0.00571132	0.4933	1	-0.0177497	0.00437329	4.94643e-05	0.0700909
ENPP5;Ectonucleotide pyrophosphatase/phosphodiesterase family member 5	ENPP5	Q9UJA9	0.0515004	0.00684251	5.33402e-14	7.5583e-11	-0.0111144	0.00663064	0.0937037	1	-0.00169883	0.00507724	0.737931	1
ENPP6;Glycerophosphocholine cholinephosphodiesterase ENPP6	ENPP6	Q6UWR7	0.0424539	0.00675816	3.38436e-10	4.79563e-07	0.0203993	0.00654891	0.00184145	1	0.00271135	0.00501466	0.588728	1
ENPP7;Ectonucleotide pyrophosphatase/phosphodiesterase family member 7	ENPP7	Q6UWV6	0.0135326	0.00708673	0.0561971	1	0.0914037	0.0068673	2.53468e-40	3.59164e-37	-0.0291129	0.00525846	3.10967e-08	4.40641e-05
ENSA;Alpha-endosulfine	ENSA	O43768	0.0126018	0.00731379	0.0848937	1	0.0500873	0.00708734	1.61072e-12	2.28239e-09	-0.0113096	0.00542694	0.0371705	1
ENTPD2;Ectonucleoside triphosphate diphosphohydrolase 2	ENTPD2	Q9Y5L3	0.0443054	0.00722383	8.7026e-10	1.23316e-06	0.0737444	0.00700016	6.53377e-26	9.25835e-23	-0.0169782	0.00536019	0.00153905	1
ENTPD5;Ectonucleoside triphosphate diphosphohydrolase 5	ENTPD5	O75356	0.0543156	0.00722328	5.62792e-14	7.97476e-11	-0.0664479	0.00699963	2.37932e-21	3.37149e-18	0.00747266	0.00535978	0.163263	1
ENTPD6;Ectonucleoside triphosphate diphosphohydrolase 6	ENTPD6	O75354	0.0313664	0.00727173	1.61149e-05	0.0228348	-0.000619912	0.00704657	0.929898	1	-0.00295196	0.00539573	0.584319	1
ENTR1;Endosome-associated-trafficking regulator 1	ENTR1	Q96C92	0.0108703	0.00713142	0.127448	1	0.0788135	0.00691061	4.47305e-30	6.33831e-27	-0.00426973	0.00529162	0.419738	1
EP300;Histone acetyltransferase p300	EP300	Q09472	0.00927554	0.00732327	0.205312	1	0.0340611	0.00709652	1.5956e-06	0.00226097	-0.00873487	0.00543398	0.107964	1
EPB41L5;Band 4.1-like protein 5	EPB41L5	Q9HCM4	-0.00450602	0.00732701	0.538567	1	0.00706613	0.00710015	0.319641	1	0.00193534	0.00543675	0.721862	1
EPCAM;Epithelial cell adhesion molecule	EPCAM	P16422	-0.0552292	0.0071711	1.37847e-14	1.95329e-11	-0.0156415	0.00694907	0.0243996	1	-0.00216553	0.00532107	0.68403	1
EPGN;Epigen	EPGN	Q6UW88	-0.00104407	0.00732306	0.886628	1	0.00561621	0.00709632	0.428701	1	-0.00653342	0.00543382	0.229231	1
EPHA1;Ephrin type-A receptor 1	EPHA1	P21709	-0.0610151	0.00644853	3.20583e-21	4.54266e-18	0.155528	0.00624886	1.45268e-135	2.05844e-132	-0.00681077	0.0047849	0.154633	1
EPHA10;Ephrin type-A receptor 10	EPHA10	Q5JZY3	0.00770656	0.00732773	0.292945	1	0.00847889	0.00710085	0.232459	1	-0.00362502	0.00543729	0.50497	1
EPHA2;Ephrin type-A receptor 2	EPHA2	P29317	-0.0780643	0.00688917	1.03191e-29	1.46222e-26	0.0514399	0.00667586	1.33879e-14	1.89706e-11	0.00461591	0.00511186	0.366543	1
EPHA4;Ephrin type-A receptor 4	EPHA4	P54764	-0.0742945	0.00728059	2.04778e-24	2.90171e-21	0.0557513	0.00705516	2.81939e-15	3.99508e-12	-0.00436468	0.00540231	0.419137	1
EPHB4;Ephrin type-B receptor 4	EPHB4	P54760	-0.1242	0.00713287	1.27831e-67	1.81137e-64	0.0100396	0.00691202	0.146376	1	0.0148382	0.0052927	0.00505754	1
EPHB6;Ephrin type-B receptor 6	EPHB6	O15197	-0.0223846	0.00719829	0.00187424	1	0.0259638	0.00697542	0.000197813	0.280302	0.00409284	0.00534124	0.44352	1
EPHX2;Bifunctional epoxide hydrolase 2	EPHX2	P34913	0.00507796	0.00730561	0.487012	1	0.0289181	0.00707941	4.42099e-05	0.0626454	-0.0054126	0.00542087	0.318056	1
EPN1;Epsin-1	EPN1	Q9Y6I3	-0.00968481	0.00732622	0.186197	1	0.0132577	0.00709938	0.061847	1	-0.00616686	0.00543616	0.256629	1
EPO;Erythropoietin	EPO	P01588	-0.138261	0.00716592	1.59998e-82	2.26717e-79	0.0966405	0.00694405	6.52493e-44	9.24583e-41	0.0136557	0.00531722	0.0102267	1
EPPK1;Epiplakin	EPPK1	P58107	-0.0315467	0.00721949	1.24793e-05	0.0176832	0.123141	0.00699596	4.71679e-69	6.68369e-66	0.00928379	0.00535697	0.0830989	1
EPS8L2;Epidermal growth factor receptor kinase substrate 8-like protein 2	EPS8L2	Q9H6S3	0.00120235	0.0069122	0.861909	1	0.104903	0.00669817	4.2622e-55	6.03953e-52	0.00627328	0.00512895	0.221296	1
ERBB2;Receptor tyrosine-protein kinase erbB-2	ERBB2	P04626	0.0903294	0.00647376	3.94451e-44	5.58938e-41	0.140442	0.00627331	3.07939e-110	4.3635e-107	-0.0303843	0.00480362	2.55796e-10	3.62463e-07
ERBB3;Receptor tyrosine-protein kinase erbB-3	ERBB3	P21860	0.152092	0.00667309	3.70383e-114	5.24833e-111	0.160495	0.00646648	7.95735e-135	1.12756e-131	0.00604057	0.00495153	0.222496	1
ERBB4;Receptor tyrosine-protein kinase erbB-4	ERBB4	Q15303	0.0608451	0.00688691	1.0473e-18	1.48402e-15	-0.0751338	0.00667367	2.3671e-29	3.35419e-26	0.00035625	0.00511019	0.944422	1
ERBIN;Erbin	ERBIN	Q96RT1	0.00247453	0.00722747	0.732068	1	0.150151	0.00700369	2.57553e-101	3.64952e-98	-0.00129547	0.00536289	0.809121	1
ERC2;ERC protein 2	ERC2	O15083	-0.0103391	0.00732499	0.158109	1	0.0352297	0.00709819	6.9667e-07	0.000987182	0.00298239	0.00543525	0.583207	1
ERCC1;DNA excision repair protein ERCC-1	ERCC1	P07992	0.00716134	0.00732773	0.32843	1	0.00750331	0.00710084	0.290665	1	-0.00920447	0.00543728	0.0904939	1
EREG;Proepiregulin	EREG	O14944	-0.014221	0.00719186	0.0480078	1	0.166103	0.00696918	1.44239e-124	2.04386e-121	-0.00387393	0.00533647	0.467883	1
ERI1;3'-5' exoribonuclease 1	ERI1	Q8IV48	-0.0115298	0.00721334	0.109964	1	0.100261	0.00699	1.58229e-46	2.24211e-43	0.00257878	0.00535241	0.629952	1
ERMAP;Erythroid membrane-associated protein	ERMAP	Q96PL5	-0.0763288	0.00698976	1.02351e-27	1.45032e-24	0.137141	0.00677333	1.23376e-90	1.74824e-87	-0.00413559	0.0051865	0.425238	1
ERN1;Serine/threonine-protein kinase/endoribonuclease IRE1	ERN1	O75460	-0.00236483	0.00706268	0.737752	1	0.119382	0.006844	7.47339e-68	1.05898e-64	-0.00653251	0.00524061	0.212583	1
ERP29;Endoplasmic reticulum resident protein 29	ERP29	P30040	0.0260184	0.00725288	0.000334549	0.474055	0.104114	0.00702831	1.687e-49	2.39048e-46	0.00116421	0.00538175	0.828736	1
ERP44;Endoplasmic reticulum resident protein 44	ERP44	Q9BS26	0.00998235	0.0070228	0.155204	1	0.187478	0.00680536	2.60665e-165	3.69362e-162	-0.0269077	0.00521102	2.43552e-07	0.000345113
ERVV-1;Endogenous retrovirus group V member 1 Env polyprotein	ERVV1	B6SEH8	0.00366403	0.00732082	0.61673	1	-0.0115748	0.00709415	0.102772	1	0.00517491	0.00543216	0.340778	1
ESAM;Endothelial cell-selective adhesion molecule	ESAM	Q96AP7	-0.0415877	0.00705158	3.72073e-09	5.27227e-06	0.108309	0.00683324	2.19358e-56	3.1083e-53	0.00123112	0.00523238	0.813985	1
ESM1;Endothelial cell-specific molecule 1	ESM1	Q9NQ30	-0.0527713	0.00685955	1.47338e-14	2.08777e-11	-0.0756554	0.00664716	5.82532e-30	8.25448e-27	-0.00419976	0.00508989	0.40931	1
ESPL1;Separin	ESPL1	Q14674	0.00943215	0.00732521	0.197884	1	-0.00802948	0.0070984	0.257993	1	-0.00614903	0.00543542	0.257941	1
ESR1;Estrogen receptor	ESR1	P03372	0.00765836	0.00731609	0.295207	1	-0.00883076	0.00708956	0.21292	1	-0.00752483	0.00542865	0.165715	1
ESYT2;Extended synaptotagmin-2	ESYT2	A0FGR8	-0.0214214	0.00721262	0.00298009	1	0.128309	0.0069893	6.38142e-75	9.04247e-72	0.0162065	0.00535187	0.00246193	1
EVI2B;Protein EVI2B	EVI2B	P34910	0.00592873	0.0073275	0.418459	1	0.0036649	0.00710062	0.605761	1	-5.99037e-05	0.00543712	0.99121	1
EVI5;Ecotropic viral integration site 5 protein homolog	EVI5	O60447	0.00241898	0.00723424	0.738096	1	0.137965	0.00701025	9.15465e-86	1.29721e-82	0.00742978	0.00536792	0.166334	1
EVPL;Envoplakin	EVPL	Q92817	0.0131321	0.00732864	0.0731602	1	-0.00370427	0.00710172	0.601951	1	-0.00185563	0.00543796	0.732927	1
EXOSC10;Exosome component 10	EXOSC10	Q01780	-0.0101213	0.00732452	0.167029	1	0.00743768	0.00709774	0.294694	1	0.000323864	0.0054349	0.952483	1
EXTL1;Exostosin-like 1	EXTL1	Q92935	0.00632855	0.00727743	0.384518	1	0.0258845	0.0070521	0.000242465	0.343573	0.0148469	0.00539996	0.00597283	1
EZR;Ezrin	EZR	P15311	-0.0155735	0.00685792	0.0231607	1	0.188663	0.00664558	2.59227e-175	3.67324e-172	0.00127785	0.00508868	0.801726	1
F10;Coagulation factor X	F10	P00742	0.0988298	0.00696944	1.61526e-45	2.28882e-42	0.154659	0.00675364	3.21713e-115	4.55867e-112	0.0157382	0.00517142	0.00234168	1
F11;Coagulation factor XI	F11	P03951	0.160159	0.006998	4.39508e-115	6.22783e-112	0.0544226	0.00678132	1.04341e-15	1.47851e-12	0.00761219	0.00519262	0.142668	1
F11R;Junctional adhesion molecule A	F11R	Q9Y624	-0.00618285	0.00713252	0.386028	1	0.179312	0.00691168	5.20201e-147	7.37125e-144	0.00130357	0.00529244	0.805445	1
F12;Coagulation factor XII	F12	P00748	0.0486884	0.00714129	9.38897e-12	1.33042e-08	0.10153	0.00692018	1.36496e-48	1.93415e-45	0.0122745	0.00529894	0.0205416	1
F13B;Coagulation factor XIII B chain	F13B	P05160	0.10483	0.00699208	1.17624e-50	1.66673e-47	0.126107	0.00677559	6.00715e-77	8.51213e-74	0.0649898	0.00518823	6.38689e-36	9.05022e-33
F2;Prothrombin	F2	P00734	0.129716	0.00715152	3.42838e-73	4.85802e-70	0.0875283	0.00693009	1.72704e-36	2.44722e-33	0.01306	0.00530654	0.0138554	1
F2R;Proteinase-activated receptor 1	F2R	P25116	0.0199729	0.0072561	0.005916	1	0.0799515	0.00703143	6.60711e-30	9.36227e-27	0.00321374	0.00538414	0.550585	1
F3;Tissue factor	F3	P13726	0.047586	0.0069196	6.2153e-12	8.80709e-09	-0.0483749	0.00670535	5.52752e-13	7.8325e-10	0.00664845	0.00513445	0.195373	1
F7;Coagulation factor VII	F7	P08709	0.0810089	0.00660972	1.83327e-34	2.59775e-31	0.250084	0.00640507	0	0	0.0169859	0.00490451	0.000534198	0.756958
F9;Coagulation factor IX	F9	P00740	0.00919609	0.00646254	0.15475	1	0.187044	0.00626245	1.35387e-193	1.91843e-190	0.0176723	0.0047953	0.000228751	0.32414
FABP1;Fatty acid-binding protein, liver	FABP1	P07148	-0.00558233	0.0067428	0.407736	1	0.0343191	0.00653402	1.5103e-07	0.00021401	-0.00879347	0.00500326	0.078833	1
FABP2;Fatty acid-binding protein, intestinal	FABP2	P12104	0.0776911	0.00720665	4.69177e-27	6.64824e-24	-0.101931	0.00698351	4.12251e-48	5.8416e-45	-0.00430062	0.00534744	0.421265	1
FABP3;Fatty acid-binding protein, heart	FABP3	P05413	-0.0269203	0.0063971	2.58046e-05	0.0365651	0.0509806	0.00619903	2.03558e-16	2.88442e-13	-0.00149525	0.00474674	0.752759	1
FABP4;Fatty acid-binding protein, adipocyte	FABP4	P15090	0.00782627	0.0052414	0.135403	1	0.103375	0.00507912	1.46967e-91	2.08252e-88	0.0025233	0.0038892	0.516473	1
FABP5;Fatty acid-binding protein 5	FABP5	Q01469	0.0216625	0.00707996	0.00221729	1	0.134127	0.00686075	1.16207e-84	1.64665e-81	-0.00260012	0.00525344	0.620647	1
FABP6;Gastrotropin	FABP6	P51161	0.072531	0.00725152	1.60248e-23	2.27071e-20	0.0196641	0.00702699	0.00513904	1	0.0139791	0.00538074	0.0093812	1
FABP9;Fatty acid-binding protein 9	FABP9	Q0Z7S8	0.0243102	0.00712352	0.000644045	0.912611	0.0103362	0.00690296	0.134308	1	0.00690736	0.00528576	0.191294	1
FADD;FAS-associated death domain protein	FADD	Q13158	0.0360957	0.00727856	7.11193e-07	0.00100776	0.075484	0.00705319	1.09354e-26	1.54955e-23	0.00104306	0.0054008	0.846857	1
FAM13A;Protein FAM13A	FAM13A	O94988	0.0183422	0.00721504	0.0110196	1	0.131348	0.00699164	2.35789e-78	3.34112e-75	0.00656224	0.00535367	0.220302	1
FAM171A2;Protein FAM171A2	FAM171A2	A8MVW0	-0.0102438	0.00732569	0.162022	1	0.0114705	0.00709886	0.106143	1	-0.00581098	0.00543577	0.285065	1
FAM171B;Protein FAM171B	FAM171B	Q6P995	0.0233197	0.00729873	0.00139936	1	0.0159323	0.00707274	0.0242883	1	-0.0015741	0.00541577	0.77132	1
FAM172A;Cotranscriptional regulator FAM172A	FAM172A	Q8WUF8	0.0391768	0.00726504	6.99283e-08	9.90884e-05	0.0982218	0.00704009	4.02172e-44	5.69878e-41	-0.00117414	0.00539077	0.827582	1
FAM20A;Pseudokinase FAM20A	FAM20A	Q96MK3	0.0273349	0.00651385	2.71828e-05	0.038518	0.172124	0.00631216	4.81765e-162	6.82661e-159	0.0069945	0.00483337	0.147871	1
FAM3B;Protein FAM3B	FAM3B	P58499	-0.0838823	0.00705598	1.57476e-32	2.23143e-29	0.159939	0.00683751	4.30979e-120	6.10698e-117	-0.00301361	0.00523564	0.564892	1
FAM3C;Protein FAM3C	FAM3C	Q92520	-0.0287257	0.00686729	2.88417e-05	0.0408688	0.109427	0.00665466	1.5653e-60	2.21803e-57	0.00889911	0.00509563	0.080747	1
FAM3D;Protein FAM3D	FAM3D	Q96BQ1	-0.0642636	0.00721277	5.35703e-19	7.59092e-16	0.0737763	0.00698945	5.24564e-26	7.43307e-23	0.000772108	0.00535199	0.885291	1
FAP;Prolyl endopeptidase FAP	FAP	Q12884	0.10228	0.00703202	8.66594e-48	1.22796e-44	0.0424921	0.00681429	4.54729e-10	6.44351e-07	-0.000241774	0.00521786	0.963043	1
FARSA;Phenylalanine--tRNA ligase alpha subunit	FARSA	Q9Y285	-0.0196382	0.00724817	0.00674368	1	0.140304	0.00702374	2.76917e-88	3.92392e-85	-0.000872338	0.00537825	0.871151	1
FAS;Tumor necrosis factor receptor superfamily member 6	FAS	P25445	-0.0046677	0.00678639	0.491581	1	0.0797637	0.00657626	8.65633e-34	1.2266e-30	-0.013219	0.0050356	0.00866591	1
FASLG;Tumor necrosis factor ligand superfamily member 6	FASLG	P48023	0.000873546	0.00683534	0.898309	1	0.0451022	0.0066237	9.97059e-12	1.41283e-08	0.00636559	0.00507193	0.209464	1
FBLN2;Fibulin-2	FBLN2	P98095	-0.0100377	0.00682738	0.141512	1	0.00524984	0.00661598	0.427486	1	0.00647946	0.00506602	0.200904	1
FBN2;Fibrillin-2	FBN2	P35556	-0.00891361	0.00732298	0.223532	1	0.0263721	0.00709624	0.000202441	0.286859	0.00284433	0.00543376	0.600661	1
FBP1;Fructose-1,6-bisphosphatase 1	FBP1	P09467	0.0576964	0.00697484	1.36211e-16	1.9301e-13	0.0322688	0.00675888	1.81064e-06	0.00256568	-0.0280276	0.00517543	6.15153e-08	8.71672e-05
FCAMR;High affinity immunoglobulin alpha and immunoglobulin mu Fc receptor	FCAMR	Q8WWV6	-0.0354255	0.00650276	5.13499e-08	7.27629e-05	0.153785	0.00630142	1.84328e-130	2.61193e-127	-0.00538831	0.00482515	0.264124	1
FCAR;Immunoglobulin alpha Fc receptor	FCAR	P24071	-0.0730237	0.00717875	2.85038e-24	4.03898e-21	0.0650457	0.00695647	9.23023e-21	1.30792e-17	0.0115982	0.00532674	0.0294601	1
FCER1A;High affinity immunoglobulin epsilon receptor subunit alpha	FCER1A	P12319	-0.0216118	0.00730798	0.00310569	1	0.00240695	0.0070817	0.733946	1	-0.00382687	0.00542263	0.480365	1
FCER2;Low affinity immunoglobulin epsilon Fc receptor	FCER2	P06734	-0.038571	0.0070684	4.88006e-08	6.91505e-05	0.0637557	0.00684955	1.37515e-20	1.94858e-17	0.0023269	0.00524486	0.657296	1
FCGR2A;Low affinity immunoglobulin gamma Fc region receptor II-a	FCGR2A	P12318	-0.0216819	0.00720911	0.00263536	1	0.0246416	0.0069859	0.000420293	0.595556	0.00579242	0.00534927	0.278885	1
FCGR2B;Low affinity immunoglobulin gamma Fc region receptor II-b	FCGR2B	P31994	0.0517122	0.00719054	6.52607e-13	9.24745e-10	0.0775096	0.0069679	1.07267e-28	1.51998e-25	-0.0018966	0.00533549	0.722241	1
FCGR3B;Low affinity immunoglobulin gamma Fc region receptor III-B	FCGR3B	O75015	-0.0324566	0.00721715	6.909e-06	0.00979005	-0.0011958	0.00699369	0.864238	1	0.00431026	0.00535523	0.4209	1
FCN1;Ficolin-1	FCN1	O00602	-0.0190808	0.00703106	0.00665521	1	0.10489	0.00681336	2.64724e-53	3.75114e-50	0.00781714	0.00521715	0.13405	1
FCN2;Ficolin-2	FCN2	Q15485	0.0819673	0.00705599	3.86275e-31	5.47351e-28	0.127085	0.00683751	9.63333e-77	1.36504e-73	0.00990225	0.00523565	0.0585906	1
FCRL1;Fc receptor-like protein 1	FCRL1	Q96LA6	-0.0299955	0.00707647	2.25317e-05	0.0319275	0.08802	0.00685736	1.25397e-37	1.77688e-34	0.00436482	0.00525084	0.405832	1
FCRL2;Fc receptor-like protein 2	FCRL2	Q96LA5	-0.0405418	0.00722298	2.00477e-08	2.84075e-05	0.0820464	0.00699934	1.1256e-31	1.59497e-28	0.0071554	0.00535956	0.181861	1
FCRL3;Fc receptor-like protein 3	FCRL3	Q96P31	-0.010554	0.00724888	0.145416	1	0.0452052	0.00702444	1.24708e-10	1.76712e-07	-0.00304918	0.00537878	0.570792	1
FCRL5;Fc receptor-like protein 5	FCRL5	Q96RD9	-0.0925778	0.00683937	1.21819e-41	1.72618e-38	0.0190954	0.0066276	0.00396419	1	0.000672684	0.00507491	0.894549	1
FCRL6;Fc receptor-like protein 6	FCRL6	Q6DN72	-0.0864955	0.00716903	1.87834e-33	2.66161e-30	0.0492723	0.00694706	1.3415e-12	1.9009e-09	-0.00645167	0.00531953	0.225204	1
FCRLB;Fc receptor-like B	FCRLB	Q6BAA4	-0.0415592	0.00717634	7.04981e-09	9.98958e-06	0.0595024	0.00695414	1.2107e-17	1.71556e-14	0.00748946	0.00532495	0.159589	1
FDX1;Adrenodoxin, mitochondrial	FDX1	P10109	-0.0359803	0.00726611	7.38693e-07	0.00104673	0.0337315	0.00704113	1.66926e-06	0.00236534	-0.00574894	0.00539156	0.286302	1
FDX2;Ferredoxin-2, mitochondrial	FDX2	Q6P4F2	-0.019515	0.00729158	0.00744584	1	0.0366986	0.00706581	2.07162e-07	0.000293549	0.0172486	0.00541046	0.0014338	1
FEN1;Flap endonuclease 1	FEN1	P39748	-0.0602091	0.007236	9.04974e-17	1.28235e-13	0.130764	0.00701195	3.04815e-77	4.31923e-74	0.0151135	0.00536922	0.00488272	1
FES;Tyrosine-protein kinase Fes/Fps	FES	P07332	0.0204133	0.00728505	0.00508024	1	0.0418132	0.00705949	3.19089e-09	4.52149e-06	0.0056994	0.00540562	0.291731	1
FETUB;Fetuin-B	FETUB	Q9UGM5	-0.0241815	0.00692178	0.000477234	0.676241	0.139367	0.00670746	2.55956e-95	3.6269e-92	0.0159333	0.00513606	0.00192214	1
FGA;Fibrinogen alpha chain	FGA	P02671	0.0928239	0.00670044	1.57797e-43	2.23599e-40	0.0347081	0.00649297	9.07374e-08	0.000128575	0.0613357	0.00497182	6.78637e-35	9.61628e-32
FGD3;FYVE, RhoGEF and PH domain-containing protein 3	FGD3	Q5JSP0	0.00311539	0.00724121	0.667031	1	0.140924	0.007017	3.27177e-89	4.6361e-86	0.00474633	0.00537309	0.377052	1
FGF12;Fibroblast growth factor 12	FGF12	P61328	0.0132615	0.00732379	0.0701896	1	0.00686031	0.00709703	0.333728	1	-0.00706468	0.00543436	0.193609	1
FGF16;Fibroblast growth factor 16	FGF16	O43320	0.0187902	0.00731537	0.0102153	1	0.033648	0.00708886	2.0767e-06	0.00294268	-0.0117734	0.00542811	0.0300914	1
FGF19;Fibroblast growth factor 19	FGF19	O95750	-0.0447423	0.00714249	3.7895e-10	5.36972e-07	0.183225	0.00692134	6.32137e-153	8.95738e-150	-0.000593301	0.00529983	0.910866	1
FGF2;Fibroblast growth factor 2	FGF2	P09038	0.00195757	0.00726142	0.787481	1	0.0810729	0.00703659	1.16497e-30	1.65076e-27	-0.00291718	0.00538808	0.588226	1
FGF20;Fibroblast growth factor 20	FGF20	Q9NP95	-0.00173696	0.00732482	0.812555	1	0.00618956	0.00709802	0.383208	1	-0.00966991	0.00543512	0.0752235	1
FGF21;Fibroblast growth factor 21	FGF21	Q9NSA1	-0.0453072	0.00669335	1.31722e-11	1.8665e-08	0.202584	0.00648611	2.85593e-211	4.04685e-208	-0.0191972	0.00496657	0.000111162	0.157516
FGF23;Fibroblast growth factor 23	FGF23	Q9GZV9	-0.0809431	0.00700791	8.36394e-31	1.18517e-27	0.122065	0.00679092	6.43873e-72	9.12368e-69	0.00570456	0.00519997	0.272633	1
FGF3;Fibroblast growth factor 3	FGF3	P11487	0.0115497	0.00732963	0.115092	1	-0.00645069	0.00710268	0.363776	1	-0.00569799	0.00543869	0.294795	1
FGF5;Fibroblast growth factor 5	FGF5	P12034	0.0346513	0.00673677	2.70953e-07	0.00038394	-0.022886	0.00652818	0.000455924	0.646045	-0.00333883	0.00499878	0.504184	1
FGF6;Fibroblast growth factor 6	FGF6	P10767	0.0195298	0.00732766	0.00769748	1	-0.014274	0.00710077	0.0444174	1	2.5111e-05	0.00543723	0.996315	1
FGF7;Fibroblast growth factor 7	FGF7	P21781	0.00400173	0.0073255	0.584881	1	-0.00599853	0.00709868	0.398105	1	-0.00487398	0.00543563	0.3699	1
FGF9;Fibroblast growth factor 9	FGF9	P31371	0.0307007	0.00732147	2.75664e-05	0.0390616	0.00725784	0.00709477	0.306322	1	-0.00122774	0.00543264	0.821208	1
FGFBP1;Fibroblast growth factor-binding protein 1	FGFBP1	Q14512	0.574138	0.00616093	0	0	-0.149661	0.00597017	1.77886e-137	2.52065e-134	-0.0634307	0.0045715	1.16596e-43	1.65216e-40
FGFBP2;Fibroblast growth factor-binding protein 2	FGFBP2	Q9BYJ0	0.112789	0.00711155	1.88245e-56	2.66743e-53	0.0572306	0.00689136	1.03606e-16	1.4681e-13	-0.003157	0.00527688	0.549663	1
FGFBP3;Fibroblast growth factor-binding protein 3	FGFBP3	Q8TAT2	0.211705	0.00687009	8.81617e-206	1.24925e-202	0.0592015	0.00665738	6.24551e-19	8.84989e-16	0.0174789	0.00509771	0.000607	0.86012
FGFR2;Fibroblast growth factor receptor 2	FGFR2	P21802	-0.000480614	0.0065602	0.941598	1	0.176844	0.00635708	1.72284e-168	2.44126e-165	-0.0283062	0.00486777	6.11462e-09	8.66442e-06
FGFR4;Fibroblast growth factor receptor 4	FGFR4	P22455	-0.00797916	0.00720326	0.267993	1	0.0338432	0.00698023	1.24968e-06	0.00177079	-0.00705614	0.00534493	0.186791	1
FGL1;Fibrinogen-like protein 1	FGL1	Q08830	-0.0738243	0.00672004	4.97216e-28	7.04556e-25	-0.0365073	0.00651197	2.08374e-08	2.95265e-05	0.0503652	0.00498637	5.91995e-24	8.38857e-21
FGR;Tyrosine-protein kinase Fgr	FGR	P09769	-0.055799	0.00722019	1.11968e-14	1.58659e-11	0.117627	0.00699663	3.51504e-63	4.98081e-60	0.00680701	0.00535749	0.203894	1
FH;Fumarate hydratase, mitochondrial	FH	P07954	-0.00237618	0.00732057	0.745494	1	0.00776854	0.00709391	0.27348	1	-0.000167201	0.00543197	0.975444	1
FHIP2A;FHF complex subunit HOOK interacting protein 2A	FHIP2A	Q5W0V3	0.00323633	0.00732835	0.658768	1	0.0154346	0.00710144	0.0297539	1	0.0041207	0.00543774	0.448578	1
FHIT;Bis(5'-adenosyl)-triphosphatase	FHIT	P49789	0.037402	0.00725907	2.58489e-07	0.000366279	0.097865	0.00703431	6.94732e-44	9.84435e-41	-0.00761044	0.00538634	0.157689	1
FIS1;Mitochondrial fission 1 protein	FIS1	Q9Y3D6	0.0451609	0.00720549	3.70958e-10	5.25647e-07	0.128839	0.00698239	1.14259e-75	1.61904e-72	0.0399393	0.00534658	8.20073e-14	1.16204e-10
FKBP14;Peptidyl-prolyl cis-trans isomerase FKBP14	FKBP14	Q9NWM8	0.0276336	0.00726576	0.000143043	0.202693	0.0857711	0.00704079	4.53768e-34	6.4299e-31	0.00303383	0.0053913	0.573624	1
FKBP1B;Peptidyl-prolyl cis-trans isomerase FKBP1B	FKBP1B	P68106	0.0138691	0.00728291	0.0568741	1	0.0916191	0.00705741	1.89715e-38	2.68826e-35	0.00315047	0.00540403	0.559907	1
FKBP4;Peptidyl-prolyl cis-trans isomerase FKBP4	FKBP4	Q02790	-0.0315471	0.00723539	1.30362e-05	0.0184722	0.119778	0.00701136	3.60727e-65	5.1115e-62	-0.0125541	0.00536877	0.0193744	1
FKBP5;Peptidyl-prolyl cis-trans isomerase FKBP5	FKBP5	Q13451	0.00423546	0.00728089	0.560758	1	0.0948249	0.00705546	4.4538e-41	6.31103e-38	-0.0060432	0.00540253	0.263324	1
FKBP7;Peptidyl-prolyl cis-trans isomerase FKBP7	FKBP7	Q9Y680	0.00634094	0.00730659	0.385488	1	0.0594275	0.00708036	4.9011e-17	6.94487e-14	0.00162338	0.0054216	0.764615	1
FKBPL;FK506-binding protein-like	FKBPL	Q9UIM3	0.0235423	0.00720221	0.00108124	1	0.14025	0.00697921	2.56292e-89	3.63166e-86	-0.00155336	0.00534415	0.771309	1
FLI1;Friend leukemia integration 1 transcription factor	FLI1	Q01543	-0.00131364	0.00712207	0.853665	1	0.217007	0.00690155	4.75012e-214	6.73092e-211	0.0140575	0.00528468	0.00781671	1
FLRT2;Leucine-rich repeat transmembrane protein FLRT2	FLRT2	O43155	-0.0439482	0.00721898	1.15603e-09	1.6381e-06	0.000127477	0.00699546	0.985461	1	-0.0116999	0.00535659	0.0289538	1
FLT1;Vascular endothelial growth factor receptor 1	FLT1	P17948	0.037492	0.00723746	2.22784e-07	0.000315686	0.0119075	0.00701337	0.0895485	1	0.000300769	0.0053703	0.955337	1
FLT3;Receptor-type tyrosine-protein kinase FLT3	FLT3	P36888	-0.000724733	0.00722229	0.92007	1	-0.00625112	0.00699867	0.371763	1	-0.021136	0.00535905	8.02955e-05	0.113779
FLT3LG;Fms-related tyrosine kinase 3 ligand	FLT3LG	P49771	0.00595694	0.00691575	0.389046	1	0.0702299	0.00670162	1.16994e-25	1.65781e-22	-0.00769263	0.00513159	0.133864	1
FLT4;Vascular endothelial growth factor receptor 3	FLT4	P35916	-0.0276868	0.00700983	7.83988e-05	0.111091	0.139056	0.00679279	1.34997e-92	1.91291e-89	0.0149071	0.0052014	0.00415968	1
FMNL1;Formin-like protein 1	FMNL1	O95466	-0.0510236	0.00715847	1.04005e-12	1.47375e-09	0.148545	0.00693682	4.36396e-101	6.18373e-98	0.00806501	0.00531169	0.128935	1
FMR1;Synaptic functional regulator FMR1	FMR1	Q06787	-0.0144134	0.00732416	0.0490851	1	0.0312585	0.00709738	1.06475e-05	0.0150876	-0.0105912	0.00543464	0.0513232	1
FN1;Fibronectin	FN1	P02751	0.13285	0.00685846	3.72774e-83	5.28221e-80	0.125041	0.0066461	1.40523e-78	1.99121e-75	-0.0150861	0.00508908	0.00303473	1
FNDC1;Fibronectin type III domain-containing protein 1	FNDC1	Q4ZHG4	0.0573577	0.00699617	2.51687e-16	3.5664e-13	0.0875807	0.00677955	4.32752e-38	6.1321e-35	-0.00119818	0.00519126	0.817466	1
FNTA;Protein farnesyltransferase/geranylgeranyltransferase type-1 subunit alpha	FNTA	P49354	-0.0168601	0.0072087	0.0193483	1	0.123273	0.00698549	2.13653e-69	3.02747e-66	0.00356415	0.00534896	0.505207	1
FOLH1;Glutamate carboxypeptidase 2	FOLH1	Q04609	0.0108378	0.00730382	0.137857	1	0.0157711	0.00707767	0.0258671	1	-0.00684225	0.00541954	0.206772	1
FOLR1;Folate receptor alpha	FOLR1	P15328	-0.0659518	0.00681287	3.88944e-22	5.51133e-19	0.0438144	0.00660192	3.25627e-11	4.61414e-08	0.0133646	0.00505525	0.00820383	1
FOLR2;Folate receptor beta	FOLR2	P14207	-0.135927	0.00682381	8.39602e-88	1.18972e-84	0.0286581	0.00661253	1.46887e-05	0.0208138	0.0176619	0.00506337	0.000486941	0.689995
FOLR3;Folate receptor gamma	FOLR3	P41439	-0.0162555	0.00726867	0.0253335	1	0.00907405	0.00704362	0.197662	1	0.014737	0.00539346	0.00629109	1
FOS;Proto-oncogene c-Fos	FOS	P01100	-0.0171354	0.00732016	0.0192452	1	0.011556	0.0070935	0.103302	1	0.0112943	0.00543166	0.0375926	1
FOSB;Protein fosB	FOSB	P53539	-0.00333442	0.00732255	0.648851	1	0.0245996	0.00709583	0.000527386	0.747305	-0.0154909	0.00543344	0.00436044	1
FOXJ3;Forkhead box protein J3	FOXJ3	Q9UPW0	0.00427676	0.00724901	0.555209	1	0.131692	0.00702456	4.88374e-78	6.92025e-75	-0.00509016	0.00537887	0.343989	1
FOXO1;Forkhead box protein O1	FOXO1	Q12778	0.00740853	0.00724446	0.306482	1	0.135345	0.00702015	2.12341e-82	3.00888e-79	-0.000359147	0.0053755	0.946732	1
FOXO3;Forkhead box protein O3	FOXO3	O43524	-0.00478111	0.00727078	0.510813	1	0.110903	0.00704566	1.23408e-55	1.74869e-52	0.000609366	0.00539503	0.910071	1
FRMD4B;FERM domain-containing protein 4B	FRMD4B	Q9Y2L6	0.036769	0.00729041	4.59403e-07	0.000650974	0.0587911	0.00706468	8.96884e-17	1.27088e-13	-0.00366386	0.00540959	0.498227	1
FRMD7;FERM domain-containing protein 7	FRMD7	Q6ZUT3	0.0289267	0.00732047	7.78214e-05	0.110273	-0.00680994	0.00709381	0.33707	1	0.000817599	0.0054319	0.880357	1
FRZB;Secreted frizzled-related protein 3	FRZB	Q92765	0.0277083	0.00687449	5.57526e-05	0.0790014	0.0577185	0.00666163	4.73194e-18	6.70516e-15	0.00445696	0.00510097	0.382262	1
FSHB;Follitropin subunit beta	FSHB	P01225	0.0809846	0.00471895	9.53206e-66	1.35069e-62	0.0151643	0.00457284	0.000913558	1	0.00263543	0.00350153	0.451665	1
FST;Follistatin	FST	P19883	0.0739952	0.00699998	4.45383e-26	6.31107e-23	0.0738559	0.00678324	1.45493e-27	2.06163e-24	0.010264	0.00519409	0.0481528	1
FSTL1;Follistatin-related protein 1	FSTL1	Q12841	-0.108336	0.00716742	1.86828e-51	2.64735e-48	0.0364952	0.0069455	1.49283e-07	0.000211534	-0.00785893	0.00531833	0.139496	1
FSTL3;Follistatin-related protein 3	FSTL3	O95633	-0.0622637	0.00631868	7.05815e-23	1.00014e-19	0.0631769	0.00612304	6.34696e-25	8.99364e-22	0.0109234	0.00468856	0.0198222	1
FTCD;Formimidoyltransferase-cyclodeaminase	FTCD	O95954	-0.0208303	0.00652804	0.00141961	1	0.196931	0.00632592	6.47334e-210	9.17273e-207	-0.0320764	0.00484391	3.59438e-11	5.09324e-08
FUCA1;Tissue alpha-L-fucosidase	FUCA1	P04066	-0.0164812	0.00720053	0.0220921	1	0.032554	0.00697758	3.08969e-06	0.00437809	-0.00407656	0.0053429	0.445477	1
FUOM;Fucose mutarotase	FUOM	A2VDF0	0.0337254	0.00666206	4.16297e-07	0.000589893	0.144063	0.00645578	1.50858e-109	2.13766e-106	-0.0242426	0.00494335	9.42759e-07	0.00133589
FURIN;Furin	FURIN	P09958	0.0111084	0.00619847	0.073121	1	0.235452	0.00600654	0	0	-0.00990339	0.00459935	0.0313087	1
FUS;RNA-binding protein FUS	FUS	P35637	-0.0497416	0.00714869	3.50796e-12	4.97078e-09	0.164779	0.00692735	4.37018e-124	6.19255e-121	0.00209053	0.00530443	0.693502	1
FUT1;Galactoside alpha-(1,2)-fucosyltransferase 1	FUT1	P19526	-0.0264958	0.00731784	0.000294209	0.416894	-0.0194469	0.00709126	0.00610283	1	-0.00699225	0.00542995	0.197852	1
FUT3_FUT5;3-galactosyl-N-acetylglucosaminide 4-alpha-L-fucosyltransferase FUT3_4-galactosyl-N-acetylglucosaminide 3-alpha-L-fucosyltransferase FUT5+A1073	FUT3_FUT5	P21217_Q11128	0.0147688	0.00681689	0.0302799	1	-0.0722832	0.00660582	8.01608e-28	1.13588e-24	0.0227471	0.00505824	6.91242e-06	0.00979489
FUT8;Alpha-(1,6)-fucosyltransferase	FUT8	Q9BYC5	0.0101201	0.00723705	0.162009	1	0.095603	0.00701297	3.29311e-42	4.66633e-39	0.00218635	0.00537	0.683906	1
FXN;Frataxin, mitochondrial	FXN	Q16595	0.0103821	0.00726301	0.152884	1	0.0822456	0.00703813	1.72388e-31	2.44274e-28	0.00716773	0.00538926	0.183526	1
FXYD5;FXYD domain-containing ion transport regulator 5	FXYD5	Q96DB9	0.0268083	0.00728903	0.000235512	0.33372	0.0682557	0.00706334	4.59493e-22	6.51102e-19	-0.00675748	0.00540857	0.211526	1
FYB1;FYN-binding protein 1	FYB1	O15117	0.0148546	0.00717305	0.0383768	1	0.16861	0.00695095	6.35241e-129	9.00137e-126	-0.00209648	0.00532251	0.693666	1
FZD10;Frizzled-10	FZD10	Q9ULW2	-0.0103763	0.00732743	0.156758	1	0.0141215	0.00710055	0.0467318	1	0.00069111	0.00543706	0.898853	1
FZD8;Frizzled-8	FZD8	Q9H461	-0.0105441	0.00732177	0.149847	1	0.0020908	0.00709507	0.768238	1	-0.00433075	0.00543286	0.425375	1
GABARAP;Gamma-aminobutyric acid receptor-associated protein	GABARAP	O95166	-0.00287943	0.00729877	0.693208	1	0.0219118	0.00707278	0.00194955	1	-0.0101777	0.0054158	0.0602165	1
GABARAPL1;Gamma-aminobutyric acid receptor-associated protein-like 1	GABARAPL1	Q9H0R8	-0.0114482	0.00732157	0.117913	1	-0.00712099	0.00709488	0.315539	1	0.000915729	0.00543272	0.866145	1
GABRA4;Gamma-aminobutyric acid receptor subunit alpha-4	GABRA4	P48169	0.00388619	0.00732404	0.595694	1	-0.0174799	0.00709727	0.0137863	1	0.00114014	0.00543455	0.83383	1
GAD1;Glutamate decarboxylase 1	GAD1	Q99259	0.0173955	0.00732374	0.0175439	1	-0.0127143	0.00709698	0.0732194	1	0.00318888	0.00543432	0.557339	1
GAD2;Glutamate decarboxylase 2	GAD2	Q05329	0.0103328	0.00732614	0.158432	1	-0.00478832	0.0070993	0.500012	1	-0.00786957	0.0054361	0.147724	1
GADD45B;Growth arrest and DNA damage-inducible protein GADD45 beta	GADD45B	O75293	-0.0182857	0.00732721	0.0125793	1	0.007219	0.00710034	0.309297	1	-0.0101293	0.0054369	0.0624611	1
GADD45GIP1;Growth arrest and DNA damage-inducible proteins-interacting protein 1	GADD45GIP1	Q8TAE8	0.00237383	0.00724993	0.743346	1	0.0996501	0.00702546	1.533e-45	2.17226e-42	0.0105109	0.00537956	0.0507251	1
GAGE2A;G antigen 2A	GAGE2A	Q6NT46	-0.00141083	0.00732409	0.847251	1	0.00284446	0.00709732	0.688585	1	-0.00587487	0.00543459	0.279698	1
GAL;Galanin peptides	GAL	P22466	0.0986942	0.00687953	1.52518e-46	2.16118e-43	-0.0775431	0.00666652	3.24186e-31	4.59372e-28	-0.00163354	0.00510471	0.748965	1
GALNT10;Polypeptide N-acetylgalactosaminyltransferase 10	GALNT10	Q86SR1	0.0258119	0.00697746	0.0002165	0.30678	0.115437	0.00676142	4.31513e-65	6.11454e-62	-0.0176841	0.00517738	0.000637021	0.902659
GALNT2;Polypeptide N-acetylgalactosaminyltransferase 2	GALNT2	Q10471	0.0407133	0.00707838	8.90379e-09	1.26167e-05	0.0271174	0.00685922	7.71891e-05	0.109377	-0.00976377	0.00525227	0.0630406	1
GALNT3;Polypeptide N-acetylgalactosaminyltransferase 3	GALNT3	Q14435	-0.0302178	0.0072943	3.44111e-05	0.0487605	0.0359919	0.00706845	3.56287e-07	0.000504859	0.00428076	0.00541248	0.429005	1
GALNT5;Polypeptide N-acetylgalactosaminyltransferase 5	GALNT5	Q7Z7M9	-0.0192192	0.00708193	0.00665424	1	0.0450533	0.00686266	5.27578e-11	7.47578e-08	0.000147542	0.0052549	0.977601	1
GALNT7;N-acetylgalactosaminyltransferase 7	GALNT7	Q86SF2	0.0230174	0.00722965	0.00145507	1	0.0322813	0.0070058	4.08384e-06	0.0057868	-0.0129137	0.00536451	0.0160786	1
GAMT;Guanidinoacetate N-methyltransferase	GAMT	Q14353	-0.00603405	0.00732618	0.410156	1	0.0130342	0.00709934	0.066369	1	-0.00279098	0.00543613	0.607666	1
GAPDH;Glyceraldehyde-3-phosphate dehydrogenase	GAPDH	P04406	0.0285722	0.00716508	6.68512e-05	0.0947282	0.116326	0.00694323	9.2943e-63	1.317e-59	0.00670572	0.00531659	0.207216	1
GART;Trifunctional purine biosynthetic protein adenosine-3	GART	P22102	0.0311735	0.00729485	1.93058e-05	0.0273564	0.00891454	0.00706898	0.207289	1	-0.0127759	0.00541289	0.0182665	1
GAS2;Growth arrest-specific protein 2	GAS2	O43903	0.0092209	0.00725744	0.203899	1	0.0524752	0.00703273	8.74598e-14	1.23931e-10	-0.0133774	0.00538513	0.0129915	1
GAS6;Growth arrest-specific protein 6	GAS6	Q14393	-0.0843278	0.00702465	3.90222e-33	5.52945e-30	-0.0875852	0.00680715	8.43601e-38	1.19538e-34	0.00887004	0.00521239	0.0888163	1
GASK1A;Golgi-associated kinase 1A	GASK1A	Q9UFP1	0.00635911	0.00709195	0.369903	1	0.117347	0.00687236	4.1502e-65	5.88084e-62	-0.00848275	0.00526233	0.106976	1
GAST;Gastrin	GAST	P01350	-0.0869473	0.00705001	7.10784e-35	1.00718e-31	0.110741	0.00683173	7.01592e-59	9.94156e-56	0.00414074	0.00523121	0.428632	1
GATA3;Trans-acting T-cell-specific transcription factor GATA-3	GATA3	P23771	-0.0111705	0.00732832	0.127444	1	0.0268503	0.00710141	0.000156467	0.221714	0.00774106	0.00543772	0.154575	1
GATD3;Glutamine amidotransferase-like class 1 domain-containing protein 3B, mitochondrial	GATD3	P0DPI2	0.0138184	0.00725707	0.0569009	1	0.0452347	0.00703237	1.27255e-10	1.80321e-07	0.00516598	0.00538486	0.337387	1
GBA;Lysosomal acid glucosylceramidase	GBA1	P04062	-0.00637046	0.00729453	0.382494	1	0.0488505	0.00706867	4.89931e-12	6.94233e-09	0.00301109	0.00541265	0.578005	1
GBP1;Guanylate-binding protein 1	GBP1	P32455	-0.0343181	0.00714853	1.58749e-06	0.00224947	0.125604	0.0069272	3.83071e-73	5.42812e-70	-0.00695113	0.00530432	0.190046	1
GBP2;Guanylate-binding protein 2	GBP2	P32456	-0.0190211	0.00730095	0.00918339	1	0.0356535	0.00707489	4.692e-07	0.000664857	-7.32031e-05	0.00541742	0.989219	1
GBP4;Guanylate-binding protein 4	GBP4	Q96PP9	-0.00669405	0.00730662	0.359588	1	0.0379777	0.00708039	8.20053e-08	0.000116202	-0.000724534	0.00542162	0.89369	1
GBP6;Guanylate-binding protein 6	GBP6	Q6ZN66	0.00383911	0.00732822	0.600365	1	-0.0120349	0.00710132	0.0901341	1	-0.00089432	0.00543765	0.869364	1
GC;Vitamin D-binding protein	GC	P02774	0.0394553	0.00723721	5.02177e-08	7.11585e-05	0.0363331	0.00701313	2.22232e-07	0.000314903	0.0234213	0.00537012	1.29591e-05	0.0183631
GCC1;GRIP and coiled-coil domain-containing protein 1	GCC1	Q96CN9	0.012904	0.00718349	0.0724478	1	0.164318	0.00696107	3.03401e-122	4.29919e-119	0.0184073	0.00533026	0.000554301	0.785444
GCG;Pro-glucagon	GCG	P01275	-0.19822	0.00679028	3.97362e-185	5.63062e-182	0.400347	0.00658003	0	0	0.0392209	0.00503849	7.2026e-15	1.02061e-11
GCHFR;GTP cyclohydrolase 1 feedback regulatory protein	GCHFR	P30047	-0.00186335	0.00684934	0.785587	1	0.11337	0.00663727	3.77415e-65	5.34796e-62	-0.000103387	0.00508231	0.98377	1
GCLM;Glutamate--cysteine ligase regulatory subunit	GCLM	P48507	-0.0164321	0.00728787	0.0241568	1	0.0896586	0.00706221	7.53863e-37	1.06822e-33	0.00602639	0.00540771	0.265112	1
GCNT1;Beta-1,3-galactosyl-O-glycosyl-glycoprotein beta-1,6-N-acetylglucosaminyltransferase	GCNT1	Q02742	-0.0710866	0.00707659	1.03674e-23	1.46906e-20	0.0644251	0.00685748	6.06136e-21	8.58895e-18	-0.00581492	0.00525093	0.268126	1
GDF15;Growth/differentiation factor 15	GDF15	Q99988	-0.122253	0.00588482	2.75456e-95	3.90321e-92	0.0684413	0.00570261	4.03625e-33	5.71936e-30	0.00105192	0.00436662	0.809634	1
GDF2;Growth/differentiation factor 2	GDF2	Q9UK05	0.131404	0.00661197	2.07442e-87	2.93946e-84	0.0340415	0.00640724	1.08504e-07	0.00015375	0.0194055	0.00490618	7.65797e-05	0.108513
GDNF;Glial cell line-derived neurotrophic factor	GDNF	P39905	-0.0160012	0.0070092	0.0224431	1	0.0986925	0.00679218	1.06994e-47	1.51611e-44	0.0166985	0.00520093	0.00132545	1
GET3;ATPase GET3	GET3	O43681	-0.0113498	0.0072537	0.117663	1	0.143062	0.0070291	1.4744e-91	2.08923e-88	-0.010838	0.00538235	0.0440578	1
GFAP;Glial fibrillary acidic protein	GFAP	P14136	0.0905127	0.0065845	6.91331e-43	9.79616e-40	-0.00907291	0.00638062	0.155051	1	0.00217806	0.0048858	0.655749	1
GFER;FAD-linked sulfhydryl oxidase ALR	GFER	P55789	0.000308028	0.00711333	0.96546	1	0.140869	0.00689308	2.72831e-92	3.86602e-89	-0.00996716	0.0052782	0.0589853	1
GFOD2;Glucose-fructose oxidoreductase domain-containing protein 2	GFOD2	Q3B7J2	-0.00757776	0.00732676	0.301023	1	0.00910097	0.00709991	0.199906	1	0.000864792	0.00543657	0.873615	1
GFRA1;GDNF family receptor alpha-1	GFRA1	P56159	-0.00338555	0.00658421	0.607121	1	0.116252	0.00638034	7.78173e-74	1.10267e-70	0.0115395	0.00488558	0.0181842	1
GFRA2;GDNF family receptor alpha-2	GFRA2	O00451	-0.0113713	0.0072735	0.11797	1	0.0385279	0.00704829	4.62692e-08	6.55635e-05	-0.000912743	0.00539705	0.865704	1
GFRA3;GDNF family receptor alpha-3	GFRA3	O60609	0.012146	0.00699084	0.0823214	1	0.00222609	0.00677439	0.742457	1	0.00834884	0.00518731	0.107522	1
GFRAL;GDNF family receptor alpha-like	GFRAL	Q6UXV0	0.0210778	0.00701056	0.00264391	1	-0.0248818	0.0067935	0.000250044	0.354312	-0.00691738	0.00520194	0.183603	1
GGA1;ADP-ribosylation factor-binding protein GGA1	GGA1	Q9UJY5	-0.000918972	0.00729932	0.899813	1	0.0201129	0.00707331	0.00446483	1	-0.00129221	0.0054162	0.811431	1
GGACT;Gamma-glutamylaminecyclotransferase	GGACT	Q9BVM4	0.0243689	0.00727418	0.000808792	1	0.083466	0.00704895	2.76124e-32	3.91268e-29	0.00143157	0.00539755	0.790837	1
GGCT;Gamma-glutamylcyclotransferase	GGCT	O75223	0.0167057	0.00724153	0.0210649	1	0.114059	0.00701731	3.43826e-59	4.87201e-56	-0.00262997	0.00537332	0.624526	1
GGH;Gamma-glutamyl hydrolase	GGH	Q92820	0.0205832	0.00677446	0.00238049	1	0.0502105	0.00656471	2.08404e-14	2.95309e-11	0.00415209	0.00502675	0.40881	1
GGT1;Glutathione hydrolase 1 proenzyme	GGT1	P19440	0.0312766	0.00636764	9.06472e-07	0.00128447	0.151046	0.00617048	3.10358e-131	4.39777e-128	-0.0243218	0.00472489	2.65255e-07	0.000375867
GGT5;Glutathione hydrolase 5 proenzyme	GGT5	P36269	-0.0255598	0.00714166	0.000345406	0.489441	0.0428169	0.00692054	6.20209e-10	8.78836e-07	-0.013903	0.00529922	0.00870471	1
GH1;Somatotropin	GH1	P01241	0.0133449	0.00669902	0.0463708	1	-0.183495	0.0064916	7.79874e-174	1.10508e-170	0.0112417	0.00497077	0.0237307	1
GH2;Growth hormone variant	GH2	P01242	0.0157644	0.00729995	0.0308161	1	0.00899893	0.00707393	0.203336	1	-0.0014142	0.00541667	0.794031	1
GHR;Growth hormone receptor	GHR	P10912	0.0208365	0.00639876	0.00112965	1	0.241138	0.00620063	0	0	-0.0183867	0.00474797	0.000107906	0.152902
GHRHR;Growth hormone-releasing hormone receptor	GHRHR	Q02643	0.0021741	0.00732918	0.766746	1	0.00904418	0.00710225	0.202876	1	-0.00546368	0.00543836	0.315069	1
GHRL;Appetite-regulating hormone	GHRL	Q9UBU3	0.0630035	0.00659709	1.37474e-21	1.94801e-18	0.115166	0.00639282	3.14201e-72	4.45223e-69	0.0407188	0.00489514	9.2466e-17	1.31024e-13
GID8;Glucose-induced degradation protein 8 homolog	GID8	Q9NWU2	0.00950432	0.00732913	0.194713	1	-0.00968237	0.0071022	0.172799	1	-0.0052645	0.00543832	0.333032	1
GIGYF2;GRB10-interacting GYF protein 2	GIGYF2	Q6Y7W6	0.0221505	0.00722527	0.00217323	1	0.113266	0.00700156	1.18825e-58	1.68376e-55	0.0057878	0.00536126	0.280346	1
GIMAP7;GTPase IMAP family member 7	GIMAP7	Q8NHV1	0.0577783	0.00720709	1.11786e-15	1.58401e-12	-0.0332328	0.00698394	1.9584e-06	0.00277505	0.0159436	0.00534777	0.00287166	1
GIMAP8;GTPase IMAP family member 8	GIMAP8	Q8ND71	-0.0337774	0.00722949	2.99124e-06	0.00423859	0.102222	0.00700564	4.4029e-48	6.23891e-45	0.00627288	0.00536439	0.242268	1
GIP;Gastric inhibitory polypeptide	GIP	P09681	-0.155446	0.00683919	1.52798e-113	2.16515e-110	0.212984	0.00662743	2.28977e-223	3.2446e-220	0.0130232	0.00507478	0.0102844	1
GIPC2;PDZ domain-containing protein GIPC2	GIPC2	Q8TF65	-0.059137	0.00695253	1.87326e-17	2.65441e-14	0.078565	0.00673726	2.29564e-31	3.25292e-28	0.00650645	0.00515888	0.207241	1
GIPC3;PDZ domain-containing protein GIPC3	GIPC3	Q8TF64	0.0383612	0.00728973	1.43046e-07	0.000202696	0.0665228	0.00706401	4.90721e-21	6.95351e-18	-0.00134023	0.00540908	0.804311	1
GIPR;Gastric inhibitory polypeptide receptor	GIPR	P48546	0.00288746	0.00732549	0.693461	1	0.00881775	0.00709867	0.214182	1	-0.0107838	0.00543562	0.0472737	1
GIT1;ARF GTPase-activating protein GIT1	GIT1	Q9Y2X7	0.019066	0.00723397	0.00840216	1	0.13567	0.00700999	5.11136e-83	7.2428e-80	0.0140745	0.00536771	0.00874372	1
GJA8;Gap junction alpha-8 protein	GJA8	P48165	0.00325855	0.0073271	0.656521	1	-0.00440611	0.00710023	0.534894	1	-0.00683411	0.00543682	0.20876	1
GKN1;Gastrokine-1	GKN1	Q9NS71	0.0236724	0.00722599	0.00105387	1	0.0108351	0.00700225	0.12178	1	-3.99803e-05	0.00536179	0.994051	1
GLA;Alpha-galactosidase A	GLA	P06280	-0.0272666	0.00671275	4.87764e-05	0.0691161	0.2081	0.0065049	2.13356e-221	3.02326e-218	-0.0012898	0.00498096	0.795679	1
GLB1;Beta-galactosidase	GLB1	P16278	0.00338883	0.00695156	0.625913	1	0.101394	0.00673632	4.83714e-51	6.85422e-48	-0.0466357	0.00515816	1.62743e-19	2.30607e-16
GLI2;Zinc finger protein GLI2	GLI2	P10070	0.00995338	0.00730684	0.173143	1	-0.0162819	0.0070806	0.0214818	1	-0.00606936	0.00542179	0.26296	1
GLO1;Lactoylglutathione lyase	GLO1	Q04760	-0.0216396	0.00714527	0.00245927	1	0.123398	0.00692403	9.8197e-71	1.39145e-67	0.00689807	0.0053019	0.193247	1
GLOD4;Glyoxalase domain-containing protein 4	GLOD4	Q9HC38	0.0193049	0.00721151	0.00743286	1	0.11946	0.00698822	2.98779e-65	4.23369e-62	-0.00390068	0.00535105	0.466034	1
GLP1R;Glucagon-like peptide 1 receptor	GLP1R	P43220	-0.00490015	0.00731787	0.503108	1	-0.0269658	0.00709129	0.000143392	0.203187	0.00101598	0.00542997	0.851578	1
GLRX;Glutaredoxin-1	GLRX	P35754	-0.00617558	0.00721119	0.391789	1	0.106401	0.00698791	3.45895e-52	4.90134e-49	-0.00557799	0.00535081	0.297207	1
GLRX5;Glutaredoxin-related protein 5, mitochondrial	GLRX5	Q86SX6	0.0190511	0.00725672	0.00866076	1	0.0855882	0.00703203	5.18004e-34	7.34012e-31	0.00767657	0.00538459	0.153977	1
GLT8D2;Glycosyltransferase 8 domain-containing protein 2	GLT8D2	Q9H1C3	0.00984648	0.00732463	0.178861	1	0.00522108	0.00709784	0.461987	1	-0.00239217	0.00543498	0.659837	1
GLYR1;Putative oxidoreductase GLYR1	GLYR1	Q49A26	-0.0307798	0.00729645	2.46583e-05	0.0349409	0.076669	0.00707053	2.36615e-27	3.35283e-24	0.00804653	0.00541407	0.137228	1
GM2A;Ganglioside GM2 activator	GM2A	P17900	-0.00272534	0.00684694	0.690605	1	0.0406926	0.00663494	8.71093e-10	1.23434e-06	-0.00997163	0.00508053	0.0496874	1
GMFG;Glia maturation factor gamma	GMFG	O60234	0.0291221	0.00726842	6.17104e-05	0.0874436	0.0918338	0.00704337	9.10682e-39	1.29044e-35	-0.00330003	0.00539328	0.540622	1
GMPR;GMP reductase 1	GMPR	P36959	0.0108089	0.00710739	0.128318	1	0.136772	0.00688733	2.7985e-87	3.96547e-84	-0.00555314	0.00527379	0.292363	1
GMPR2;GMP reductase 2	GMPR2	Q9P2T1	0.0117653	0.00721206	0.102827	1	0.135408	0.00698876	3.39618e-83	4.81238e-80	9.3843e-05	0.00535146	0.986009	1
GNAS;Neuroendocrine secretory protein 55	GNAS	O95467	-0.00499814	0.00722898	0.489317	1	0.0943357	0.00700515	3.11011e-41	4.40702e-38	-0.0047981	0.00536401	0.371061	1
GNE;Bifunctional UDP-N-acetylglucosamine 2-epimerase/N-acetylmannosamine kinase	GNE	Q9Y223	-0.00843723	0.00727302	0.246027	1	0.100203	0.00704783	9.54074e-46	1.35192e-42	-0.00307852	0.00539669	0.568379	1
GNGT1;Guanine nucleotide-binding protein G(T) subunit gamma-T1	GNGT1	P63211	-0.0110676	0.00731741	0.130416	1	0.0077537	0.00709085	0.274191	1	-0.0112552	0.00542963	0.0381869	1
GNLY;Granulysin	GNLY	P22749	-0.00404768	0.00714986	0.571316	1	0.066731	0.00692848	6.26973e-22	8.8842e-19	0.0335106	0.0053053	2.70862e-10	3.83812e-07
GNPDA1;Glucosamine-6-phosphate isomerase 1	GNPDA1	P46926	-0.00101636	0.00729907	0.889257	1	0.0357438	0.00707307	4.35946e-07	0.000617736	0.00213403	0.00541602	0.693568	1
GNPDA2;Glucosamine-6-phosphate isomerase 2	GNPDA2	Q8TDQ7	0.040918	0.00722513	1.49649e-08	2.12053e-05	0.0993242	0.00700142	1.48709e-45	2.1072e-42	0.00242345	0.00536115	0.651244	1
GOLGA3;Golgin subfamily A member 3	GOLGA3	Q08378	-0.011211	0.00722904	0.120953	1	0.144685	0.00700521	3.2612e-94	4.62112e-91	0.0125685	0.00536405	0.0191295	1
GOLM2;Protein GOLM2	GOLM2	Q6P4E1	0.0191285	0.00681285	0.00499224	1	0.124647	0.00660191	4.06732e-79	5.76339e-76	0.00582632	0.00505524	0.249111	1
GOPC;Golgi-associated PDZ and coiled-coil motif-containing protein	GOPC	Q9HD26	0.024577	0.00725479	0.000705608	0.999847	0.113236	0.00703016	3.66761e-58	5.197e-55	0.000655798	0.00538316	0.903039	1
GORASP2;Golgi reassembly-stacking protein 2	GORASP2	Q9H8Y8	-0.00488072	0.00723562	0.499973	1	0.135346	0.00701159	1.35033e-82	1.91342e-79	0.00346661	0.00536894	0.518492	1
GOT1;Aspartate aminotransferase, cytoplasmic	GOT1	P17174	0.00255599	0.00710453	0.719022	1	0.0711652	0.00688455	5.20733e-25	7.37879e-22	-0.0174797	0.00527166	0.000914755	1
GP1BA;Platelet glycoprotein Ib alpha chain	GP1BA	P07359	0.0606929	0.00721281	4.08902e-17	5.79415e-14	0.116242	0.00698948	7.151e-62	1.0133e-58	0.0168964	0.00535201	0.00159523	1
GP1BB;Platelet glycoprotein Ib beta chain	GP1BB	P13224	0.0584783	0.00724465	7.1373e-16	1.01136e-12	0.0869717	0.00702034	3.56907e-35	5.05737e-32	0.00956221	0.00537564	0.0752804	1
GP2;Pancreatic secretory granule membrane major glycoprotein GP2	GP2	P55259	0.016592	0.00706912	0.0189251	1	-0.0404616	0.00685024	3.5244e-09	4.99407e-06	-0.00162334	0.00524539	0.756959	1
GP5;Platelet glycoprotein V	GP5	P40197	0.0606907	0.00726238	6.67383e-17	9.45682e-14	0.063623	0.00703751	1.63627e-19	2.3186e-16	0.00100313	0.00538879	0.852327	1
GP6;Platelet glycoprotein VI	GP6	Q9HCN6	0.0405773	0.00728863	2.60749e-08	3.69482e-05	0.0601294	0.00706296	1.75577e-17	2.48793e-14	0.000589278	0.00540827	0.913236	1
GPA33;Cell surface A33 antigen	GPA33	Q99795	-0.0317412	0.00722391	1.11653e-05	0.0158212	0.0336032	0.00700024	1.59077e-06	0.00225413	-0.00665006	0.00536025	0.214753	1
GPC1;Glypican-1	GPC1	P35052	0.0387454	0.00712394	5.40073e-08	7.65283e-05	-0.0037841	0.00690337	0.58359	1	0.00694118	0.00528607	0.189155	1
GPC5;Glypican-5	GPC5	P78333	0.112574	0.00712963	5.71489e-56	8.09799e-53	0.0893087	0.00690888	3.88714e-38	5.50807e-35	-0.0216065	0.00529029	4.433e-05	0.0628156
GPD1;Glycerol-3-phosphate dehydrogenase	GPD1	P21695	0.00416858	0.00648638	0.520445	1	0.166321	0.00628555	8.5249e-153	1.20798e-149	-0.0191323	0.00481299	7.04772e-05	0.0998662
GPHA2;Glycoprotein hormone alpha-2	GPHA2	Q96T91	0.0180016	0.00722705	0.0127477	1	-0.00668787	0.00700328	0.339603	1	-0.00845774	0.00536258	0.114763	1
GPI;Glucose-6-phosphate isomerase	GPI	P06744	0.0151696	0.00721327	0.035472	1	0.108947	0.00698992	1.37302e-54	1.94558e-51	-0.00349618	0.00535235	0.513629	1
GPIHBP1;Glycosylphosphatidylinositol-anchored high density lipoprotein-binding protein 1	GPIHBP1	Q8IV16	0.023219	0.00729659	0.00146304	1	-0.0261924	0.00707067	0.000212234	0.300735	0.00756534	0.00541418	0.162326	1
GPKOW;G-patch domain and KOW motifs-containing protein	GPKOW	Q92917	-0.0266272	0.00713965	0.000192179	0.272317	0.151103	0.00691859	4.80588e-105	6.80994e-102	0.00767755	0.00529773	0.147286	1
GPNMB;Transmembrane glycoprotein NMB	GPNMB	Q14956	0.0411865	0.00713427	7.85007e-09	1.11236e-05	0.0263961	0.00691338	0.0001347	0.190869	-0.000900636	0.00529374	0.864907	1
GPR101;Probable G-protein coupled receptor 101	GPR101	Q96P66	-0.0133858	0.00732075	0.0674873	1	0.000843702	0.00709408	0.905331	1	0.00351742	0.0054321	0.517297	1
GPR158;Probable G-protein coupled receptor 158	GPR158	Q5T848	0.050126	0.00715332	2.47188e-12	3.50265e-09	-0.00126783	0.00693183	0.854877	1	-8.06318e-05	0.00530787	0.98788	1
GPR15L;Protein GPR15L	GPR15LG	Q6UWK7	0.0150176	0.00685022	0.028366	1	0.0596815	0.00663811	2.57505e-19	3.64884e-16	0.0127601	0.00508296	0.0120647	1
GPR37;Prosaposin receptor GPR37	GPR37	O15354	-0.0936937	0.00677251	2.05238e-43	2.90823e-40	0.294575	0.00656281	0	0	0.0443871	0.0050253	1.06771e-18	1.51295e-15
GPRC5C;G-protein coupled receptor family C group 5 member C	GPRC5C	Q9NQ84	-0.071187	0.00716288	3.04298e-23	4.3119e-20	0.173054	0.0069411	5.0906e-136	7.21338e-133	-0.0110053	0.00531497	0.0384011	1
GRAP2;GRB2-related adapter protein 2	GRAP2	O75791	0.0240455	0.00726732	0.000938179	1	0.100971	0.00704231	1.71617e-46	2.43181e-43	-0.00221288	0.00539246	0.68154	1
GRHPR;Glyoxylate reductase/hydroxypyruvate reductase	GRHPR	Q9UBQ7	0.0221207	0.00714511	0.00196351	1	0.148295	0.00692387	4.02135e-101	5.69825e-98	-0.0132072	0.00530177	0.0127396	1
GRIK2;Glutamate receptor ionotropic, kainate 2	GRIK2	Q13002	0.0103749	0.00730362	0.155465	1	0.000324892	0.00707748	0.963386	1	-0.00433378	0.00541939	0.423901	1
GRIN2B;Glutamate receptor ionotropic, NMDA 2B	GRIN2B	Q13224	-0.0118644	0.00732426	0.105267	1	0.0026701	0.00709748	0.706767	1	0.000520248	0.00543471	0.923738	1
GRK5;G protein-coupled receptor kinase 5	GRK5	P34947	0.000709677	0.00729179	0.922468	1	0.094622	0.00706601	8.57262e-41	1.21474e-37	0.00075898	0.00541061	0.888443	1
GRN;Progranulin	GRN	P28799	0.01132	0.00709292	0.110508	1	0.0692541	0.0068733	7.61265e-24	1.07871e-20	0.0102494	0.00526305	0.0514908	1
GRP;Gastrin-releasing peptide	GRP	P07492	-0.0253427	0.00705432	0.000327947	0.464701	0.250069	0.0068359	1.36491e-287	1.93408e-284	0.0340862	0.00523441	7.51797e-11	1.0653e-07
GRPEL1;GrpE protein homolog 1, mitochondrial	GRPEL1	Q9HAV7	-0.0400938	0.00711756	1.78365e-08	2.52744e-05	0.12662	0.00689718	6.35337e-75	9.00272e-72	-0.00723942	0.00528134	0.17046	1
GRSF1;G-rich sequence factor 1	GRSF1	Q12849	-0.0372906	0.0072937	3.19218e-07	0.000452332	0.079781	0.00706787	1.69328e-29	2.39938e-26	0.00374706	0.00541203	0.488718	1
GSAP;Gamma-secretase-activating protein	GSAP	A4D1B5	0.014613	0.00732446	0.0460399	1	0.0126591	0.00709767	0.0745033	1	-0.0133634	0.00543486	0.013944	1
GSN;Gelsolin	GSN	P06396	0.113845	0.00718572	2.45229e-56	3.47489e-53	-0.0552243	0.00696323	2.24037e-15	3.17461e-12	-0.00475791	0.00533191	0.372214	1
GSR;Glutathione reductase, mitochondrial	GSR	P00390	0.0495377	0.00706042	2.31997e-12	3.2874e-09	0.0784372	0.00684181	2.25483e-30	3.1951e-27	0.0083953	0.00523894	0.109058	1
GSTA1;Glutathione S-transferase A1	GSTA1	P08263	-0.00120888	0.0064547	0.851437	1	0.18682	0.00625485	1.33642e-193	1.89371e-190	-0.0310147	0.00478949	9.56841e-11	1.35584e-07
GSTA3;Glutathione S-transferase A3	GSTA3	Q16772	0.00790445	0.00663749	0.233709	1	0.178504	0.00643197	1.03407e-167	1.46528e-164	-0.033782	0.00492512	7.04225e-12	9.97887e-09
GSTM4;Glutathione S-transferase Mu 4	GSTM4	Q03013	-0.0122335	0.00732004	0.0946854	1	0.00965498	0.00709339	0.173484	1	0.00291876	0.00543158	0.591016	1
GSTP1;Glutathione S-transferase P	GSTP1	P09211	0.0259589	0.00732048	0.000391536	0.554806	-0.0484614	0.00709382	8.53983e-12	1.21009e-08	-0.0144978	0.0054319	0.00761083	1
GSTT2B;Glutathione S-transferase theta-2B	GSTT2B	P0CG30	0.0180016	0.00729888	0.0136542	1	0.02808	0.00707288	7.19873e-05	0.102006	0.00189342	0.00541587	0.726636	1
GTF2IRD1;General transcription factor II-I repeat domain-containing protein 1	GTF2IRD1	Q9UHL9	-0.00657592	0.00732523	0.369348	1	0.000389166	0.00709842	0.956279	1	-0.00672309	0.00543543	0.216132	1
GTPBP2;GTP-binding protein 2	GTPBP2	Q9BX10	0.0351984	0.00725331	1.22289e-06	0.00173283	0.110939	0.00702872	6.27049e-56	8.88529e-53	0.00165011	0.00538206	0.759154	1
GUCA2A;Guanylin	GUCA2A	Q02747	-0.0520717	0.0070393	1.42089e-13	2.01341e-10	0.0533151	0.00682134	5.60706e-15	7.9452e-12	0.0171898	0.00522326	0.000999306	1
GUCY2C;Heat-stable enterotoxin receptor	GUCY2C	P25092	-0.0127341	0.00731087	0.0815514	1	0.00633246	0.00708451	0.37141	1	0.00199398	0.00542478	0.713197	1
GUK1;Guanylate kinase	GUK1	Q16774	0.00178787	0.00732689	0.807221	1	-0.00976623	0.00710003	0.168979	1	0.00244085	0.00543666	0.653462	1
GUSB;Beta-glucuronidase	GUSB	P08236	-0.0436702	0.00617872	1.60281e-12	2.27119e-09	0.190542	0.00598741	3.87816e-219	5.49535e-216	-0.0222485	0.0045847	1.22264e-06	0.00173248
GYS1;Glycogen [starch] synthase, muscle	GYS1	P13807	0.0129574	0.00724764	0.0738158	1	0.125027	0.00702323	1.39188e-70	1.9723e-67	0.0117245	0.00537786	0.0292539	1
GZMA;Granzyme A	GZMA	P12544	-0.068794	0.007021	1.22363e-22	1.73388e-19	0.156835	0.00680361	1.03573e-116	1.46763e-113	-0.00545113	0.00520969	0.295409	1
GZMB;Granzyme B	GZMB	P10144	-0.0190731	0.00714762	0.0076236	1	0.0496445	0.00692631	7.7862e-13	1.1033e-09	-0.0125422	0.00530364	0.0180437	1
GZMH;Granzyme H	GZMH	P20718	-0.0372164	0.00703962	1.25281e-07	0.000177523	0.0797153	0.00682165	1.72562e-31	2.4452e-28	-0.000758338	0.0052235	0.884571	1
H2AP;Huntingtin-interacting protein M	H2AP	O75409	-0.00318463	0.00732988	0.663948	1	-0.00131645	0.00710293	0.852964	1	0.00256535	0.00543888	0.637166	1
HADH;Hydroxyacyl-coenzyme A dehydrogenase, mitochondrial	HADH	Q16836	-0.0069275	0.00732887	0.344546	1	-0.000935931	0.00710195	0.895155	1	0.00527651	0.00543813	0.331913	1
HAGH;Hydroxyacylglutathione hydrolase, mitochondrial	HAGH	Q16775	-0.0314216	0.00712604	1.03958e-05	0.0147309	0.0515314	0.0069054	8.68593e-14	1.2308e-10	-0.00484562	0.00528763	0.35946	1
HAO1;Hydroxyacid oxidase 1	HAO1	Q9UJM8	-0.0106406	0.00679964	0.117621	1	0.145191	0.0065891	7.01482e-107	9.93999e-104	-0.0227972	0.00504543	6.25177e-06	0.00885876
HARS1;Histidine--tRNA ligase, cytoplasmic	HARS1	P12081	0.0167949	0.00726239	0.0207515	1	0.104943	0.00703753	3.92591e-50	5.56301e-47	-0.00163318	0.0053888	0.761839	1
HAVCR1;Hepatitis A virus cellular receptor 1	HAVCR1	Q96D42	0.0383203	0.00630132	1.20425e-09	1.70642e-06	0.115388	0.00610622	2.99237e-79	4.24019e-76	-0.0118787	0.00467568	0.0110725	1
HAVCR2;Hepatitis A virus cellular receptor 2	HAVCR2	Q8TDQ0	-0.12488	0.0068027	6.44631e-75	9.13442e-72	0.0585862	0.00659207	6.5466e-19	9.27653e-16	0.0124059	0.0050477	0.0139868	1
HBEGF;Proheparin-binding EGF-like growth factor	HBEGF	Q99075	0.0203006	0.00711087	0.00430789	1	0.159429	0.00689069	1.48324e-117	2.10176e-114	-0.00253251	0.00527637	0.63125	1
HBQ1;Hemoglobin subunit theta-1	HBQ1	P09105	0.0233585	0.00718114	0.00114397	1	0.00589727	0.00695879	0.396747	1	-0.0144502	0.00532851	0.00669392	1
HBZ;Hemoglobin subunit zeta	HBZ	P02008	0.0133293	0.00731199	0.0683212	1	0.0217237	0.00708559	0.00217178	1	0.000731357	0.00542561	0.892773	1
HCG22;Protein PBMUCL2	HCG22	E2RYF7	0.0131649	0.00732075	0.0721371	1	-0.024242	0.00709408	0.000633356	0.897466	-0.00410122	0.0054321	0.450256	1
HCLS1;Hematopoietic lineage cell-specific protein	HCLS1	P14317	0.00315818	0.00721262	0.661484	1	0.144914	0.00698929	6.35755e-95	9.00866e-92	-0.00131675	0.00535187	0.805656	1
HDAC8;Histone deacetylase 8	HDAC8	Q9BY41	0.00817513	0.00731528	0.263771	1	0.000385758	0.00708878	0.956602	1	-0.00161941	0.00542805	0.765445	1
HDAC9;Histone deacetylase 9	HDAC9	Q9UKV0	-0.0175458	0.0073282	0.0166582	1	0.00877591	0.0071013	0.216534	1	-0.00376201	0.00543763	0.489038	1
HDDC2;5'-deoxynucleotidase HDDC2	HDDC2	Q7Z4H3	-0.00623041	0.00726397	0.391056	1	0.0281964	0.00703905	6.19595e-05	0.0877966	-0.00751292	0.00538997	0.163366	1
HDGF;Hepatoma-derived growth factor	HDGF	P51858	0.00261378	0.00724997	0.718459	1	0.0703497	0.00702549	1.42973e-23	2.02592e-20	-0.00511325	0.00537958	0.341869	1
HDGFL2;Hepatoma-derived growth factor-related protein 2	HDGFL2	Q7Z4V5	-0.0112922	0.00712964	0.113241	1	0.159176	0.00690889	1.37188e-116	1.94395e-113	0.00120616	0.0052903	0.819652	1
HEBP1;Heme-binding protein 1	HEBP1	Q9NRV9	0.0126366	0.00732524	0.0845216	1	-0.00662668	0.00709843	0.350547	1	-0.00180632	0.00543543	0.739648	1
HEG1;Protein HEG homolog 1	HEG1	Q9ULI3	-0.0224342	0.00652033	0.000580964	0.823225	0.230639	0.00631844	2.2166e-286	3.14092e-283	0.0255795	0.00483818	1.25068e-07	0.000177222
HEPACAM2;HEPACAM family member 2	HEPACAM2	A8MVW5	-0.0125788	0.0071976	0.0805344	1	-0.0273524	0.00697475	8.81166e-05	0.124861	-0.00863522	0.00534073	0.105917	1
HEPH;Hephaestin	HEPH	Q9BQS7	-0.0726654	0.00697663	2.29224e-25	3.24811e-22	0.122189	0.00676061	1.09536e-72	1.55212e-69	-0.00136294	0.00517676	0.792336	1
HEXIM1;Protein HEXIM1	HEXIM1	O94992	0.0172232	0.00719888	0.0167402	1	0.120122	0.00697598	3.54925e-66	5.02928e-63	0.000154807	0.00534167	0.97688	1
HGF;Hepatocyte growth factor	HGF	P14210	-0.0728149	0.00632126	1.20024e-30	1.70074e-27	0.197223	0.00612554	3.48476e-224	4.9379e-221	-0.0132668	0.00469047	0.00467978	1
HGFAC;Hepatocyte growth factor activator	HGFAC	Q04756	0.129167	0.00715922	1.92998e-72	2.73479e-69	-0.00124997	0.00693755	0.857017	1	0.00120171	0.00531225	0.821035	1
HGS;Hepatocyte growth factor-regulated tyrosine kinase substrate	HGS	O14964	-0.0155753	0.00723413	0.0313228	1	0.151069	0.00701014	2.42722e-102	3.43937e-99	0.00405586	0.00536783	0.449903	1
HHEX;Hematopoietically-expressed homeobox protein HHEX	HHEX	Q03014	-0.00530049	0.00680247	0.435867	1	0.305042	0.00659184	0	0	0.023895	0.00504753	2.20998e-06	0.00313155
HIF1A;Hypoxia-inducible factor 1-alpha	HIF1A	Q16665	-0.0107578	0.00732375	0.141872	1	0.0203762	0.00709698	0.00409287	1	-0.00270961	0.00543433	0.618057	1
HIP1;Huntingtin-interacting protein 1	HIP1	O00291	0.000755452	0.00732682	0.917878	1	0.00989904	0.00709997	0.163254	1	0.00390781	0.00543661	0.472272	1
HIP1R;Huntingtin-interacting protein 1-related protein	HIP1R	O75146	-0.0395871	0.00700307	1.59057e-08	2.25383e-05	0.118894	0.00678624	1.97262e-68	2.79521e-65	0.00335999	0.00519638	0.517894	1
HJV;Hemojuvelin	HJV	Q6ZVN8	-0.00638767	0.00694783	0.357905	1	0.170028	0.00673271	1.78117e-139	2.52391e-136	-0.000320111	0.00515539	0.95049	1
HK2;Hexokinase-2	HK2	P52789	0.0075873	0.00732846	0.300527	1	-0.00738811	0.00710155	0.298184	1	-0.00626879	0.00543783	0.248996	1
HLA-A;HLA class I histocompatibility antigen, A alpha chain	HLAA	P04439	-0.0128771	0.00728752	0.0772368	1	0.00764728	0.00706188	0.278862	1	-0.00155253	0.00540745	0.774031	1
HLA-DRA;HLA class II histocompatibility antigen, DR alpha chain	HLADRA	P01903	-0.00487799	0.00724512	0.500775	1	-0.0300913	0.0070208	1.82379e-05	0.0258431	-0.0113831	0.00537599	0.034234	1
HLA-E;HLA class I histocompatibility antigen, alpha chain E	HLAE	P13747	-0.0801775	0.00700579	2.83493e-30	4.0171e-27	0.0992471	0.00678887	2.93891e-48	4.16444e-45	0.0127987	0.0051984	0.0138192	1
HMBS;Porphobilinogen deaminase	HMBS	P08397	-0.0240339	0.00716671	0.00079865	1	0.0786795	0.00694481	1.05818e-29	1.49944e-26	-0.00806622	0.0053178	0.129318	1
HMCN2;Hemicentin-2	HMCN2	Q8NDA2	-0.0303285	0.00714989	2.2229e-05	0.0314984	0.021511	0.00692851	0.00190614	1	0.00193861	0.00530532	0.714809	1
HMGCL;Hydroxymethylglutaryl-CoA lyase, mitochondrial	HMGCL	P35914	-0.00374217	0.00728414	0.607436	1	0.0739048	0.00705861	1.29134e-25	1.82983e-22	0.00251432	0.00540494	0.641798	1
HMGCS1;Hydroxymethylglutaryl-CoA synthase, cytoplasmic	HMGCS1	Q01581	-0.00755458	0.00732807	0.30259	1	-0.00169131	0.00710117	0.811748	1	0.00680309	0.00543754	0.210893	1
HMMR;Hyaluronan mediated motility receptor	HMMR	O75330	-0.000407348	0.00732643	0.955661	1	-0.00403919	0.00709958	0.569405	1	-0.00049792	0.00543632	0.927023	1
HMOX1;Heme oxygenase 1	HMOX1	P09601	-0.0100967	0.0070904	0.154457	1	-0.0140947	0.00687086	0.0402373	1	-0.013185	0.00526118	0.0122117	1
HMOX2;Heme oxygenase 2	HMOX2	P30519	0.053399	0.00716444	9.30975e-14	1.31919e-10	0.112624	0.00694261	5.75035e-59	8.14825e-56	-0.00782737	0.00531612	0.140926	1
HNF1A;Hepatocyte nuclear factor 1-alpha	HNF1A	P20823	-0.0039397	0.00732687	0.590784	1	0.0060742	0.00710001	0.392269	1	0.00125194	0.00543664	0.817878	1
HNMT;Histamine N-methyltransferase	HNMT	P50135	-0.000600132	0.00666049	0.928206	1	0.110044	0.00645426	6.38611e-65	9.04912e-62	-0.00605282	0.00494218	0.220687	1
HNRNPK;Heterogeneous nuclear ribonucleoprotein K	HNRNPK	P61978	-0.00244709	0.00721801	0.734592	1	0.134174	0.00699452	1.34534e-81	1.90634e-78	4.49667e-05	0.00535587	0.993301	1
HNRNPUL1;Heterogeneous nuclear ribonucleoprotein U-like protein 1	HNRNPUL1	Q9BUJ2	-0.0270859	0.00709015	0.000133565	0.189262	0.15574	0.00687062	6.03211e-113	8.5475e-110	0.00471972	0.00526099	0.369664	1
HPCAL1;Hippocalcin-like protein 1	HPCAL1	P37235	0.00185876	0.00730141	0.799052	1	0.0584678	0.00707534	1.46215e-16	2.07187e-13	-0.000970272	0.00541775	0.857867	1
HPGDS;Hematopoietic prostaglandin D synthase	HPGDS	O60760	0.080642	0.00724397	9.75523e-29	1.38232e-25	0.0355149	0.00701968	4.22833e-07	0.000599155	-0.00238384	0.00537514	0.657412	1
HPSE;Heparanase	HPSE	Q9Y251	-0.0211575	0.00719977	0.00329879	1	0.139157	0.00697684	5.02273e-88	7.11721e-85	0.0049578	0.00534234	0.353403	1
HRAS;GTPase Hras	HRAS	P01112	0.00500027	0.00732529	0.494862	1	0.00785569	0.00709848	0.268443	1	0.00178815	0.00543548	0.742174	1
HRC;Sarcoplasmic reticulum histidine-rich calcium-binding protein	HRC	P23327	-0.012098	0.00724486	0.0949537	1	-0.0510287	0.00702054	3.71068e-13	5.25803e-10	-0.00785219	0.0053758	0.144119	1
HRG;Histidine-rich glycoprotein	HRG	P04196	0.0620232	0.00715488	4.55547e-18	6.4551e-15	0.0508943	0.00693335	2.17366e-13	3.08008e-10	-0.00946545	0.00530903	0.0746118	1
HS1BP3;HCLS1-binding protein 3	HS1BP3	Q53T59	0.0172506	0.00722642	0.0169845	1	0.123005	0.00700267	8.91342e-69	1.26303e-65	0.00108244	0.00536211	0.84002	1
HS3ST3B1;Heparan sulfate glucosamine 3-O-sulfotransferase 3B1	HS3ST3B1	Q9Y662	0.0663351	0.00714824	1.78978e-20	2.53611e-17	0.137623	0.00692691	2.32575e-87	3.29559e-84	0.00248948	0.0053041	0.638822	1
HS6ST1;Heparan-sulfate 6-O-sulfotransferase 1	HS6ST1	O60243	-0.0293604	0.00698575	2.6416e-05	0.0374314	0.263497	0.00676945	0	0	-0.00802705	0.00518353	0.121494	1
HS6ST2;Heparan-sulfate 6-O-sulfotransferase 2	HS6ST2	Q96MM7	-0.0267731	0.00691021	0.000107068	0.151716	0.0583817	0.00669625	2.93813e-18	4.16334e-15	-0.00720012	0.00512748	0.160261	1
HSBP1;Heat shock factor-binding protein 1	HSBP1	O75506	0.000562526	0.00729096	0.938502	1	0.0434767	0.00706521	7.65421e-10	1.0846e-06	0.00304353	0.00541	0.573728	1
HSD11B1;Corticosteroid 11-beta-dehydrogenase isozyme 1	HSD11B1	P28845	0.103268	0.00682563	1.50321e-51	2.13005e-48	-0.130168	0.00661429	9.2859e-86	1.31581e-82	-0.0257507	0.00506472	3.70824e-07	0.000525457
HSD17B14;17-beta-hydroxysteroid dehydrogenase 14	HSD17B14	Q9BPX1	0.000265018	0.00723624	0.970785	1	0.0691181	0.00701219	6.85396e-23	9.71206e-20	0.0161132	0.0053694	0.00269346	1
HSD17B3;Testosterone 17-beta-dehydrogenase 3	HSD17B3	P37058	0.0042035	0.00731174	0.565364	1	0.0360092	0.00708535	3.74961e-07	0.00053132	0.00212862	0.00542542	0.694807	1
HSDL2;Hydroxysteroid dehydrogenase-like protein 2	HSDL2	Q6YN16	0.00618703	0.00710337	0.383761	1	0.118196	0.00688343	8.10031e-66	1.14781e-62	0.0116149	0.00527081	0.0275568	1
HSP90B1;Endoplasmin	HSP90B1	P14625	0.00879788	0.00732185	0.22953	1	-0.00452188	0.00709515	0.52392	1	-0.00813387	0.00543292	0.134364	1
HSPA1A;Heat shock 70 kDa protein 1A	HSPA1A	P0DMV8	0.000413948	0.0071893	0.954085	1	0.135381	0.00696669	1.12271e-83	1.59088e-80	0.00580807	0.00533456	0.276266	1
HSPA2;Heat shock-related 70 kDa protein 2	HSPA2	P54652	-0.0178795	0.00717982	0.01277	1	0.0678873	0.00695751	1.83075e-22	2.59418e-19	0.00624516	0.00532753	0.241108	1
HSPB1;Heat shock protein beta-1	HSPB1	P04792	0.0235933	0.00726134	0.0011585	1	0.0887772	0.00703651	2.04909e-36	2.90357e-33	-0.00162973	0.00538802	0.762293	1
HSPB6;Heat shock protein beta-6	HSPB6	O14558	-0.022089	0.00617155	0.000345163	0.489096	0.0736883	0.00598046	8.18547e-35	1.15988e-31	0.0136521	0.00457938	0.00287302	1
HSPG2;Basement membrane-specific heparan sulfate proteoglycan core protein	HSPG2	P98160	-0.00202479	0.00657483	0.758114	1	0.0513055	0.00637126	8.35459e-16	1.18384e-12	0.00932887	0.00487862	0.0558594	1
HTR1A;5-hydroxytryptamine receptor 1A	HTR1A	P08908	-0.00241217	0.00731639	0.741633	1	0.00101568	0.00708986	0.886087	1	-0.000112558	0.00542887	0.983459	1
HTR1B;5-hydroxytryptamine receptor 1B	HTR1B	P28222	0.00346956	0.00732178	0.635597	1	-0.0156941	0.00709508	0.0269751	1	-0.00673826	0.00543287	0.214882	1
HTRA2;Serine protease HTRA2, mitochondrial	HTRA2	O43464	0.014824	0.00724662	0.0407994	1	0.116406	0.00702225	1.75634e-61	2.48874e-58	-0.00652044	0.0053771	0.225279	1
HYAL1;Hyaluronidase-1	HYAL1	Q12794	0.0306179	0.00710139	1.62557e-05	0.0230344	0.0161987	0.00688151	0.0185806	1	0.0186141	0.00526933	0.000412135	0.583996
HYOU1;Hypoxia up-regulated protein 1	HYOU1	Q9Y4L1	-0.0229028	0.00709825	0.0012541	1	0.125371	0.00687847	6.95274e-74	9.85204e-71	0.0411583	0.00526701	5.67684e-15	8.04408e-12
ICA1;Islet cell autoantigen 1	ICA1	Q05084	0.023624	0.00726326	0.00114487	1	0.108592	0.00703837	1.57497e-53	2.23174e-50	-0.00688413	0.00538945	0.201493	1
ICAM1;Intercellular adhesion molecule 1	ICAM1	P05362	-0.00382709	0.0068633	0.57711	1	0.0778689	0.0066508	1.3241e-31	1.87626e-28	-0.00190659	0.00509267	0.708124	1
ICAM2;Intercellular adhesion molecule 2	ICAM2	P13598	-0.106389	0.00727986	3.15572e-48	4.47166e-45	0.0384763	0.00705446	4.95291e-08	7.01827e-05	0.00946446	0.00540177	0.0797645	1
ICAM3;Intercellular adhesion molecule 3	ICAM3	P32942	-0.0450214	0.00723217	4.86493e-10	6.89361e-07	0.0061356	0.00700825	0.381317	1	0.0111055	0.00536638	0.0385107	1
ICAM4;Intercellular adhesion molecule 4	ICAM4	Q14773	0.0489816	0.00723243	1.28564e-11	1.82175e-08	-0.069971	0.00700849	1.92901e-23	2.73341e-20	0.0114938	0.00536657	0.0322218	1
ICAM5;Intercellular adhesion molecule 5	ICAM5	Q9UMF0	0.01967	0.00691513	0.00445087	1	0.0362184	0.00670101	6.52589e-08	9.24718e-05	0.000911094	0.00513113	0.859068	1
ICOSLG;ICOS ligand	ICOSLG	O75144	0.0360788	0.00722658	5.9884e-07	0.000848556	-0.000463078	0.00700283	0.947277	1	-0.0184655	0.00536223	0.000574659	0.814292
ID4;DNA-binding protein inhibitor ID-4	ID4	P47928	-0.0139416	0.007324	0.0569762	1	-0.0110296	0.00709723	0.120175	1	0.00559735	0.00543452	0.303034	1
IDI2;Isopentenyl-diphosphate delta-isomerase 2	IDI2	Q9BXS1	-0.0209329	0.0071114	0.00324667	1	0.0142126	0.00689121	0.0391743	1	-0.00400094	0.00527676	0.448325	1
IDO1;Indoleamine 2,3-dioxygenase 1	IDO1	P14902	-0.041968	0.00708932	3.25123e-09	4.60699e-06	0.113263	0.00686982	7.68594e-61	1.0891e-57	0.0138586	0.00526038	0.00842907	1
IDS;Iduronate 2-sulfatase	IDS	P22304	0.121168	0.0072221	6.26965e-63	8.8841e-60	-0.0334841	0.00699848	1.72123e-06	0.00243898	-0.0280701	0.0053589	1.63232e-07	0.0002313
IDUA;Alpha-L-iduronidase	IDUA	P35475	-0.021756	0.00710866	0.00221137	1	0.152011	0.00688856	3.47853e-107	4.92908e-104	-0.0216338	0.00527473	4.11563e-05	0.0583185
IFI30;Gamma-interferon-inducible lysosomal thiol reductase	IFI30	P13284	-0.084613	0.00660929	1.93311e-37	2.73922e-34	0.139579	0.00640465	1.31803e-104	1.86765e-101	0.0077314	0.00490419	0.114923	1
IFIT1;Interferon-induced protein with tetratricopeptide repeats 1	IFIT1	P09914	-0.00560101	0.00732716	0.444623	1	0.0152251	0.00710029	0.0320161	1	-0.00793548	0.00543686	0.144417	1
IFIT3;Interferon-induced protein with tetratricopeptide repeats 3	IFIT3	O14879	-0.0323778	0.00730999	9.48461e-06	0.0134397	0.0752767	0.00708366	2.45118e-26	3.47332e-23	-0.00826449	0.00542412	0.127604	1
IFNAR1;Interferon alpha/beta receptor 1	IFNAR1	P17181	0.0559849	0.00724696	1.1454e-14	1.62303e-11	0.0568377	0.00702257	5.97786e-16	8.47063e-13	0.00312854	0.00537735	0.560705	1
IFNG;Interferon gamma	IFNG	P01579	-0.0458111	0.00726051	2.83023e-10	4.01044e-07	0.0484024	0.0070357	6.10489e-12	8.65063e-09	0.00606653	0.0053874	0.260149	1
IFNGR1;Interferon gamma receptor 1	IFNGR1	P15260	-0.0139385	0.00715716	0.0514845	1	0.0317698	0.00693555	4.64963e-06	0.00658852	0.0144496	0.00531072	0.00651475	1
IFNGR2;Interferon gamma receptor 2	IFNGR2	P38484	-0.0293878	0.00710637	3.55136e-05	0.0503228	0.0898398	0.00688634	8.22882e-39	1.16602e-35	-0.00942489	0.00527303	0.0738854	1
IFNL1;Interferon lambda-1	IFNL1	Q8IU54	-0.0383343	0.00728674	1.44239e-07	0.000204387	0.0220892	0.00706112	0.00175969	1	-0.0155453	0.00540687	0.00404143	1
IFNL2;Interferon lambda-2	IFNL2	Q8IZJ0	-0.0146023	0.00732416	0.0461904	1	0.00998297	0.00709738	0.159563	1	0.000984535	0.00543463	0.856243	1
IFNLR1;Interferon lambda receptor 1	IFNLR1	Q8IU57	0.023868	0.00700893	0.000661483	0.937321	0.0990929	0.00679191	4.5022e-48	6.37962e-45	0.00759118	0.00520073	0.144399	1
IFNW1;Interferon omega-1	IFNW1	P05000	0.0147308	0.00732706	0.0443893	1	-0.0207476	0.0071002	0.00347881	1	0.00519538	0.00543679	0.339283	1
IFT20;Intraflagellar transport protein 20 homolog	IFT20	Q8IY31	0.000777493	0.00729252	0.915095	1	0.0826703	0.00706672	1.48335e-31	2.1019e-28	0.00179188	0.00541116	0.740537	1
IGBP1;Immunoglobulin-binding protein 1	IGBP1	P78318	-0.00521879	0.00718988	0.467934	1	0.152916	0.00696726	4.66677e-106	6.61281e-103	-0.000956398	0.005335	0.857728	1
IGDCC3;Immunoglobulin superfamily DCC subclass member 3	IGDCC3	Q8IVU1	-0.00539641	0.00732877	0.461534	1	-0.00330892	0.00710185	0.641274	1	-0.00666236	0.00543806	0.220532	1
IGDCC4;Immunoglobulin superfamily DCC subclass member 4	IGDCC4	Q8TDY8	0.0593411	0.00680255	2.81674e-18	3.99133e-15	-0.0492028	0.00659193	8.57988e-14	1.21577e-10	-0.00488596	0.00504759	0.333062	1
IGF1R;Insulin-like growth factor 1 receptor	IGF1R	P08069	0.0214333	0.00701684	0.00225563	1	0.0789072	0.00679958	4.44167e-31	6.29385e-28	0.00188764	0.0052066	0.716945	1
IGF2BP3;Insulin-like growth factor 2 mRNA-binding protein 3	IGF2BP3	O00425	-0.00466321	0.0073157	0.523852	1	0.0168904	0.00708919	0.0171982	1	-0.00188212	0.00542836	0.728804	1
IGF2R;Cation-independent mannose-6-phosphate receptor	IGF2R	P11717	0.0319044	0.0068892	3.65081e-06	0.0051732	0.129062	0.00667589	7.69464e-83	1.09033e-79	-0.0058243	0.00511189	0.254559	1
IGFBP1;Insulin-like growth factor-binding protein 1	IGFBP1	P08833	0.121917	0.00640252	1.94299e-80	2.75322e-77	-0.234542	0.00620428	1.36892e-306	1.93976e-303	0.0126847	0.00475076	0.00758805	1
IGFBP2;Insulin-like growth factor-binding protein 2	IGFBP2	P18065	-0.0124676	0.00609544	0.0408224	1	-0.157922	0.00590671	6.4589e-156	9.15227e-153	0.0202387	0.00452291	7.67537e-06	0.010876
IGFBP3;Insulin-like growth factor-binding protein 3	IGFBP3	P17936	0.101884	0.00686813	1.24025e-49	1.75743e-46	0.121752	0.00665547	2.06221e-74	2.92215e-71	0.0221443	0.00509625	1.39531e-05	0.0197716
IGFBP4;Insulin-like growth factor-binding protein 4	IGFBP4	P22692	-0.0780566	0.00647619	2.17911e-33	3.0878e-30	0.125826	0.00627567	6.359e-89	9.0107e-86	0.0297851	0.00480543	5.77352e-10	8.18108e-07
IGFBP6;Insulin-like growth factor-binding protein 6	IGFBP6	P24592	-0.0131999	0.00619724	0.0331808	1	0.0621481	0.00600535	4.60353e-25	6.52321e-22	0.00734847	0.00459844	0.110044	1
IGFBP7;Insulin-like growth factor-binding protein 7	IGFBP7	Q16270	-0.0136826	0.00684469	0.0456142	1	0.0313486	0.00663276	2.29493e-06	0.00325192	-0.0124073	0.00507886	0.0145733	1
IGFBPL1;Insulin-like growth factor-binding protein-like 1	IGFBPL1	Q8WX77	-0.102975	0.00670795	5.16378e-53	7.31708e-50	0.0982622	0.00650026	1.82421e-51	2.5849e-48	-0.00283664	0.0049774	0.568747	1
IGFL4;Insulin growth factor-like family member 4	IGFL4	Q6B9Z1	-0.0121801	0.00732339	0.0962859	1	0.0219071	0.00709664	0.00202365	1	-0.00641583	0.00543406	0.237742	1
IGHMBP2;DNA-binding protein SMUBP-2	IGHMBP2	P38935	-0.000913227	0.00731323	0.900625	1	0.0554295	0.00708679	5.3634e-15	7.59994e-12	0.00199232	0.00542652	0.713513	1
IGLC2;Immunoglobulin lambda constant 2	IGLC2	P0DOY2	-0.077409	0.00720487	6.96232e-27	9.86561e-24	0.034553	0.00698179	7.49311e-07	0.00106177	0.0172348	0.00534612	0.00126621	1
IGLON5;IgLON family member 5	IGLON5	A6NGN9	0.0044106	0.00732856	0.547286	1	-0.0123885	0.00710164	0.0810882	1	-0.00743534	0.0054379	0.171534	1
IGSF21;Immunoglobulin superfamily member 21	IGSF21	Q96ID5	0.0221744	0.0070509	0.00166279	1	0.0326087	0.00683258	1.82654e-06	0.00258821	-0.00828027	0.00523187	0.113508	1
IGSF3;Immunoglobulin superfamily member 3	IGSF3	O75054	-0.0627963	0.00650364	4.95776e-22	7.02515e-19	0.153813	0.00630227	1.79347e-130	2.54134e-127	-0.0205106	0.0048258	2.1412e-05	0.0303408
IGSF8;Immunoglobulin superfamily member 8	IGSF8	Q969P0	-0.0175882	0.00690844	0.0109037	1	0.238918	0.00669453	4.59517e-274	6.51136e-271	0.0120915	0.00512616	0.0183407	1
IGSF9;Protein turtle homolog A	IGSF9	Q9P2J2	-0.0819871	0.00596663	7.4441e-43	1.05483e-39	0.272047	0.00578188	0	0	-0.021371	0.00442733	1.3914e-06	0.00197161
IKBKG;NF-kappa-B essential modulator	IKBKG	Q9Y6K9	0.01094	0.00723648	0.130598	1	0.130537	0.00701242	5.66943e-77	8.03358e-74	0.00257202	0.00536958	0.631942	1
IKZF2;Zinc finger protein Helios	IKZF2	Q9UKS7	0.0105301	0.00730168	0.14927	1	-0.0108399	0.0070756	0.12553	1	-0.00276738	0.00541795	0.609509	1
IL10;Interleukin-10	IL10	P22301	-0.0438262	0.00731158	2.06636e-09	2.92804e-06	0.0258832	0.0070852	0.000259431	0.367614	-0.00448735	0.0054253	0.408177	1
IL10RA;Interleukin-10 receptor subunit alpha	IL10RA	Q13651	-0.0251357	0.00731883	0.000594569	0.842504	0.0379966	0.00709222	8.49035e-08	0.000120308	-0.00630331	0.00543068	0.245778	1
IL10RB;Interleukin-10 receptor subunit beta	IL10RB	Q08334	-0.0750824	0.00685602	7.26289e-28	1.02915e-24	0.117048	0.00664374	3.56395e-69	5.05012e-66	-0.00450924	0.00508727	0.37542	1
IL11;Interleukin-11	IL11	P20809	0.010259	0.00732343	0.161271	1	0.0159658	0.00709667	0.0244708	1	0.00260826	0.00543409	0.631244	1
IL12A_IL12B;Interleukin-12	IL12A_IL12B	P29459_P29460	-0.0721379	0.0068565	7.54457e-26	1.06907e-22	0.118557	0.00664421	6.64827e-71	9.42059e-68	-0.00711408	0.00508763	0.162029	1
IL12B;Interleukin-12 subunit beta	IL12B	P29460	-0.0767923	0.0068133	2.05046e-29	2.90551e-26	0.108956	0.00660234	5.94264e-61	8.42072e-58	-0.00882183	0.00505557	0.0809983	1
IL12RB1;Interleukin-12 receptor subunit beta-1	IL12RB1	P42701	-0.0562903	0.00717751	4.53692e-15	6.42882e-12	0.0686724	0.00695527	5.81358e-23	8.23784e-20	-0.00413987	0.00532582	0.436975	1
IL12RB2;Interleukin-12 receptor subunit beta-2	IL12RB2	Q99665	0.00918145	0.00727729	0.20708	1	-0.0123668	0.00705197	0.0794965	1	-0.0167657	0.00539986	0.0019053	1
IL13;Interleukin-13	IL13	P35225	-0.00220129	0.00732683	0.763841	1	0.00570832	0.00709997	0.421407	1	-0.0025992	0.00543662	0.632588	1
IL13RA1;Interleukin-13 receptor subunit alpha-1	IL13RA1	P78552	0.068977	0.00692593	2.46752e-23	3.49648e-20	0.112595	0.00671149	6.37068e-63	9.02725e-60	-0.00990588	0.00513915	0.0539212	1
IL13RA2;Interleukin-13 receptor subunit alpha-2	IL13RA2	Q14627	0.0209971	0.00732605	0.00415818	1	-0.0199787	0.00709922	0.00489233	1	-0.00785741	0.00543604	0.148346	1
IL15;Interleukin-15	IL15	P40933	-0.0594706	0.00721774	1.78847e-16	2.53426e-13	0.0435559	0.00699426	4.79665e-10	6.79685e-07	-0.00526283	0.00535567	0.325779	1
IL15RA;Interleukin-15 receptor subunit alpha	IL15RA	Q13261	-0.0359239	0.00710632	4.32091e-07	0.000612273	0.0311019	0.00688629	6.30739e-06	0.00893757	-0.00322786	0.00527299	0.540443	1
IL16;Pro-interleukin-16	IL16	Q14005	-0.029182	0.0068406	1.99531e-05	0.0282736	0.208831	0.0066288	7.47852e-215	1.05971e-211	0.021657	0.00507583	1.98908e-05	0.0281852
IL17A;Interleukin-17A	IL17A	Q16552	-0.0646934	0.0073125	9.40224e-19	1.3323e-15	0.0237165	0.00708608	0.000818029	1	0.00699839	0.00542598	0.197131	1
IL17C;Interleukin-17C	IL17C	Q9P0M4	-0.054156	0.00718053	4.73738e-14	6.71287e-11	0.00464844	0.0069582	0.504105	1	0.0151845	0.00532806	0.00437565	1
IL17D;Interleukin-17D	IL17D	Q8TAD2	0.0366814	0.00684173	8.30908e-08	0.00011774	0.0560331	0.0066299	2.98275e-17	4.22656e-14	0.0146576	0.00507667	0.00388861	1
IL17F;Interleukin-17F	IL17F	Q96PD4	-0.0236772	0.00732488	0.00122853	1	0.017584	0.00709808	0.013243	1	-0.00195618	0.00543517	0.718915	1
IL17RA;Interleukin-17 receptor A	IL17RA	Q96F46	-0.00671895	0.00730181	0.357487	1	0.0301648	0.00707573	2.02102e-05	0.0286379	0.0041765	0.00541805	0.440802	1
IL17RB;Interleukin-17 receptor B	IL17RB	Q9NRM6	0.0721776	0.0068703	8.87326e-26	1.25734e-22	-0.139158	0.00665758	1.968e-96	2.78866e-93	-0.0129759	0.00509787	0.0109208	1
IL18;Interleukin-18	IL18	Q14116	-0.0586915	0.00695589	3.35892e-17	4.7596e-14	0.140681	0.00674052	3.75916e-96	5.32673e-93	-0.00526776	0.00516138	0.307446	1
IL18BP;Interleukin-18-binding protein	IL18BP	O95998	-0.0969556	0.0069032	1.09075e-44	1.54559e-41	0.0668685	0.00668945	1.70339e-23	2.4137e-20	0.00550509	0.00512227	0.2825	1
IL18R1;Interleukin-18 receptor 1	IL18R1	Q13478	-0.00999147	0.00661338	0.130849	1	0.144366	0.00640861	1.39195e-111	1.97239e-108	-0.014282	0.00490722	0.00361186	1
IL18RAP;Interleukin-18 receptor accessory protein	IL18RAP	O95256	0.00292242	0.00724422	0.686646	1	0.00496619	0.00701991	0.479296	1	0.00358632	0.00537532	0.50466	1
IL19;Interleukin-19	IL19	Q9UHD0	-0.0604005	0.00712803	2.46892e-17	3.49847e-14	0.0434876	0.00690733	3.09287e-10	4.3826e-07	0.0166508	0.00528911	0.00164457	1
IL1A;Interleukin-1 alpha	IL1A	P01583	0.0155463	0.00732805	0.0338885	1	0.00494477	0.00710116	0.486225	1	0.00280589	0.00543752	0.605841	1
IL1B;Interleukin-1 beta	IL1B	P01584	8.12275e-05	0.00727466	0.991091	1	0.0750312	0.00704942	2.04849e-26	2.90271e-23	0.00106528	0.00539791	0.843554	1
IL1R1;Interleukin-1 receptor type 1	IL1R1	P14778	-0.100524	0.00714585	7.96542e-45	1.1287e-41	-0.00836672	0.0069246	0.226955	1	0.0124492	0.00530233	0.0188866	1
IL1R2;Interleukin-1 receptor type 2	IL1R2	P27930	0.0220557	0.00703668	0.00172351	1	0.118746	0.0068188	1.22933e-67	1.74196e-64	-0.0191021	0.00522132	0.000254074	0.360023
IL1RAP;Interleukin-1 receptor accessory protein	IL1RAP	Q9NPH3	0.0728354	0.00696978	1.59396e-25	2.25865e-22	-0.0603754	0.00675398	4.10435e-19	5.81586e-16	0.00709399	0.00517168	0.170166	1
IL1RL1;Interleukin-1 receptor-like 1	IL1RL1	Q01638	-0.0115251	0.0067599	0.0882177	1	-0.00596459	0.0065506	0.362544	1	0.000328944	0.00501595	0.947713	1
IL1RL2;Interleukin-1 receptor-like 2	IL1RL2	Q9HB29	0.0205916	0.00693394	0.00298314	1	0.109218	0.00671925	3.40654e-59	4.82707e-56	-0.0112714	0.00514509	0.0284786	1
IL1RN;Interleukin-1 receptor antagonist protein	IL1RN	P18510	-0.0859633	0.00624191	4.86059e-43	6.88746e-40	0.191992	0.00604865	4.96537e-218	7.03593e-215	-0.00650882	0.00463159	0.159938	1
IL2;Interleukin-2	IL2	P60568	-0.00853331	0.00732925	0.244317	1	0.0032694	0.00710231	0.645283	1	-0.00136163	0.00543841	0.8023	1
IL20;Interleukin-20	IL20	Q9NYY1	0.0113627	0.00731695	0.12045	1	-0.000562401	0.0070904	0.93678	1	-0.00346017	0.00542929	0.523923	1
IL20RA;Interleukin-20 receptor subunit alpha	IL20RA	Q9UHF4	-0.00773835	0.00732784	0.290966	1	0.0161434	0.00710095	0.0230077	1	0.000134761	0.00543737	0.980227	1
IL20RB;Interleukin-20 receptor subunit beta	IL20RB	Q6UXL0	0.0132582	0.00732469	0.0702931	1	0.00051375	0.0070979	0.942299	1	-0.00692705	0.00543503	0.202488	1
IL21R;Interleukin-21 receptor	IL21R	Q9HBE5	0.00192891	0.00732762	0.792369	1	-7.06398e-05	0.00710074	0.992063	1	-0.00474612	0.0054372	0.382725	1
IL22;Interleukin-22	IL22	Q9GZX6	-0.0496093	0.00699174	1.31388e-12	1.86176e-09	0.0168882	0.00677525	0.0126846	1	0.00123441	0.00518797	0.811931	1
IL22RA1;Interleukin-22 receptor subunit alpha-1	IL22RA1	Q8N6P7	0.00177404	0.00728469	0.807596	1	0.0424025	0.00705914	1.91123e-09	2.70822e-06	-0.00205273	0.00540535	0.704127	1
IL24;Interleukin-24	IL24	Q13007	-0.00183123	0.00732779	0.802665	1	0.00453201	0.00710091	0.523328	1	-0.012169	0.00543733	0.025224	1
IL25;Interleukin-25	IL25	Q9H293	-0.000442261	0.00732868	0.95188	1	0.0106599	0.00710176	0.133359	1	-0.00134509	0.00543799	0.804638	1
IL2RA;Interleukin-2 receptor subunit alpha	IL2RA	P01589	-0.0926276	0.00702645	1.36989e-39	1.94114e-36	0.0191748	0.0068089	0.00486326	1	0.0150101	0.00521373	0.00399238	1
IL2RB;Interleukin-2 receptor subunit beta	IL2RB	P14784	-0.00244298	0.00730796	0.738162	1	0.00987498	0.00708169	0.163194	1	-0.00160133	0.00542262	0.767761	1
IL2RG;Cytokine receptor common subunit gamma	IL2RG	P31785	-0.0115928	0.00730059	0.112313	1	0.0193963	0.00707454	0.0061152	1	-0.000390451	0.00541715	0.942541	1
IL3;Interleukin-3	IL3	P08700	0.00777893	0.00733003	0.288588	1	-0.00136599	0.00710307	0.847501	1	-0.00341779	0.00543899	0.529754	1
IL31;Interleukin-31	IL31	Q6EBC2	0.0128363	0.00732412	0.0796788	1	-0.00723104	0.00709735	0.308287	1	-0.00295337	0.00543461	0.586832	1
IL31RA;Interleukin-31 receptor subunit alpha	IL31RA	Q8NI17	0.0461683	0.00724394	1.87195e-10	2.65256e-07	0.0344706	0.00701965	9.12066e-07	0.0012924	-0.013875	0.00537511	0.00984594	1
IL32;Interleukin-32	IL32	P24001	0.125184	0.00701428	6.26405e-71	8.87615e-68	-0.164083	0.00679709	1.03365e-127	1.46468e-124	-0.00845608	0.0052047	0.104235	1
IL33;Interleukin-33	IL33	O95760	-0.00762001	0.00731909	0.29783	1	0.00469815	0.00709247	0.507711	1	-0.00134523	0.00543087	0.804367	1
IL34;Interleukin-34	IL34	Q6ZMJ4	0.0012921	0.00730385	0.859583	1	0.0438626	0.0070777	5.80775e-10	8.22958e-07	-0.00118707	0.00541957	0.826625	1
IL36A;Interleukin-36 alpha	IL36A	Q9UHA7	0.0154082	0.00732637	0.0354626	1	-0.008891	0.00709952	0.210455	1	-0.00349522	0.00543627	0.520265	1
IL36G;Interleukin-36 gamma	IL36G	Q9NZH8	-0.0133546	0.00725762	0.0657654	1	0.0258793	0.0070329	0.000233816	0.331317	0.00434653	0.00538526	0.419605	1
IL3RA;Interleukin-3 receptor subunit alpha	IL3RA	P26951	-0.0580444	0.0070377	1.67111e-16	2.36796e-13	0.0336928	0.0068198	7.83058e-07	0.00110959	-0.00343876	0.00522208	0.510219	1
IL4;Interleukin-4	IL4	P05112	-0.00755718	0.00732741	0.30238	1	0.0203514	0.00710054	0.00415697	1	0.00518203	0.00543705	0.340548	1
IL4R;Interleukin-4 receptor subunit alpha	IL4R	P24394	-0.0886042	0.00715993	4.22098e-35	5.98113e-32	0.0409424	0.00693824	3.64637e-09	5.16691e-06	0.00415762	0.00531277	0.433884	1
IL5;Interleukin-5	IL5	P05113	0.00684546	0.00730386	0.348642	1	0.00464023	0.00707771	0.512078	1	-0.00516479	0.00541957	0.340603	1
IL5RA;Interleukin-5 receptor subunit alpha	IL5RA	Q01344	-0.0782378	0.00713689	6.42501e-28	9.10423e-25	-0.00988484	0.00691591	0.15293	1	0.00819587	0.00529568	0.121715	1
IL6;Interleukin-6	IL6	P05231	-0.0653716	0.00672798	2.7385e-22	3.88046e-19	0.0567724	0.00651967	3.2286e-18	4.57492e-15	0.0316384	0.00499226	2.36347e-10	3.34904e-07
IL6R;Interleukin-6 receptor subunit alpha	IL6R	P08887	0.0332931	0.00714255	3.15475e-06	0.00447028	0.0541089	0.0069214	5.53204e-15	7.8389e-12	0.0082729	0.00529988	0.118542	1
IL6ST;Interleukin-6 receptor subunit beta	IL6ST	P40189	0.0373386	0.00713632	1.68462e-07	0.00023871	0.0368371	0.00691536	1.00536e-07	0.00014246	0.00192131	0.00529525	0.716729	1
IL7;Interleukin-7	IL7	P13232	0.0453674	0.00725465	4.05789e-10	5.75003e-07	0.0809045	0.00703003	1.35723e-30	1.9232e-27	-0.00851509	0.00538306	0.113697	1
IL7R;Interleukin-7 receptor subunit alpha	IL7R	P16871	0.0667783	0.00703756	2.47717e-21	3.51015e-18	-0.0882694	0.00681966	3.13089e-38	4.43647e-35	-0.0211858	0.00522198	4.98043e-05	0.0705727
IL9;Interleukin-9	IL9	P15248	0.00130247	0.00732867	0.858942	1	-0.00230129	0.00710175	0.745906	1	0.0102762	0.00543798	0.0588051	1
ILKAP;Integrin-linked kinase-associated serine/threonine phosphatase 2C	ILKAP	Q9H0C8	-0.0126476	0.00724985	0.0810747	1	0.126557	0.00702538	3.17453e-72	4.49831e-69	-0.00196516	0.0053795	0.714885	1
IMMT;MICOS complex subunit MIC60	IMMT	Q16891	-0.0340551	0.00700791	1.18174e-06	0.00167453	0.102409	0.00679092	3.15636e-51	4.47256e-48	0.000136233	0.00519997	0.979099	1
IMPA1;Inositol monophosphatase 1	IMPA1	P29218	0.0348792	0.00730204	1.7896e-06	0.00253587	0.0562396	0.00707595	1.95163e-15	2.76546e-12	-0.00388501	0.00541822	0.473362	1
IMPACT;Protein IMPACT	IMPACT	Q9P2X3	0.00591136	0.00718944	0.410953	1	0.140085	0.00696683	2.02014e-89	2.86253e-86	-0.0024087	0.00533467	0.651619	1
IMPG1;Interphotoreceptor matrix proteoglycan 1	IMPG1	Q17R60	0.00898254	0.0073233	0.219992	1	-0.00672683	0.00709655	0.343186	1	-0.00843035	0.005434	0.120813	1
ING1;Inhibitor of growth protein 1	ING1	Q9UK53	-0.0105993	0.00727532	0.145156	1	0.0915974	0.00705005	1.65567e-38	2.34609e-35	-0.00137419	0.00539839	0.799068	1
INHBB;Inhibin beta B chain	INHBB	P09529	0.00527308	0.00686694	0.442556	1	0.0308687	0.00665432	3.51548e-06	0.00498144	0.0127735	0.00509537	0.0121844	1
INHBC;Inhibin beta C chain	INHBC	P55103	-0.00810914	0.00642219	0.206714	1	0.195081	0.00622334	9.09677e-213	1.28901e-209	-0.00719682	0.00476536	0.130992	1
INPP1;Inositol polyphosphate 1-phosphatase	INPP1	P49441	0.0416497	0.00725274	9.39869e-09	1.33179e-05	0.0607528	0.00702817	5.64378e-18	7.99724e-15	-0.00654197	0.00538164	0.224142	1
INPP5D;Phosphatidylinositol 3,4,5-trisphosphate 5-phosphatase 1	INPP5D	Q92835	-0.0648891	0.00703249	2.93178e-20	4.15433e-17	0.23714	0.00681474	6.87719e-261	9.74498e-258	0.00984905	0.00521821	0.0591097	1
INPP5J;Phosphatidylinositol 4,5-bisphosphate 5-phosphatase A	INPP5J	Q15735	-0.0345418	0.00723373	1.80334e-06	0.00255533	0.0638028	0.00700975	9.31993e-20	1.32063e-16	-0.019317	0.00536753	0.000320054	0.453516
INPPL1;Phosphatidylinositol 3,4,5-trisphosphate 5-phosphatase 2	INPPL1	O15357	-0.000542303	0.00721634	0.940096	1	0.160039	0.0069929	4.44286e-115	6.29553e-112	0.00749253	0.00535463	0.161743	1
INSL3;Insulin-like 3	INSL3	P51460	0.0214735	0.00381732	1.86599e-08	2.64411e-05	0.0215495	0.00369912	5.74127e-09	8.13538e-06	-0.00527607	0.00283251	0.0625147	1
INSL4;Early placenta insulin-like peptide	INSL4	Q14641	-0.0267651	0.00729248	0.00024268	0.343878	0.0113502	0.00706668	0.108248	1	0.00467166	0.00541113	0.387954	1
INSL5;Insulin-like peptide INSL5	INSL5	Q9Y5Q6	-0.0471659	0.00689425	7.97388e-12	1.1299e-08	0.0796616	0.00668078	1.02598e-32	1.45381e-29	0.00257002	0.00511564	0.6154	1
INSR;Insulin receptor	INSR	P06213	0.0202835	0.00726973	0.0052715	1	0.0415528	0.00704464	3.70151e-09	5.24504e-06	-0.00903849	0.00539425	0.0938295	1
IPCEF1;Interactor protein for cytohesin exchange factors 1	IPCEF1	Q8WWN9	0.000973952	0.00713163	0.891373	1	0.172841	0.00691081	7.40723e-137	1.0496e-133	0.00643265	0.00529177	0.224147	1
IQGAP2;Ras GTPase-activating-like protein IQGAP2	IQGAP2	Q13576	-0.00472018	0.00722103	0.513328	1	0.111625	0.00699744	4.35948e-57	6.17738e-54	-0.0115368	0.00535811	0.0313144	1
IRAG2;Inositol 1,4,5-triphosphate receptor associated 2	IRAG2	Q12912	0.0336174	0.00729825	4.11468e-06	0.00583051	0.0505096	0.00707227	9.38139e-13	1.32934e-09	0.00121187	0.00541541	0.822928	1
IRAK1;Interleukin-1 receptor-associated kinase 1	IRAK1	P51617	0.011058	0.00722445	0.125869	1	0.1387	0.00700076	6.96471e-87	9.86899e-84	0.000173691	0.00536065	0.974152	1
IRAK4;Interleukin-1 receptor-associated kinase 4	IRAK4	Q9NWZ3	0.020523	0.00725793	0.00469157	1	0.108709	0.00703321	1.02369e-53	1.45057e-50	-0.000844719	0.00538549	0.875363	1
ISLR2;Immunoglobulin superfamily containing leucine-rich repeat protein 2	ISLR2	Q6UXK2	0.0209871	0.00721199	0.00361616	1	0.0139191	0.00698869	0.046416	1	-0.00900402	0.00535141	0.0924705	1
ISM1;Isthmin-1	ISM1	B1AKI9	0.0071925	0.00692637	0.299081	1	0.128737	0.00671191	1.40882e-81	1.9963e-78	-0.0209636	0.00513947	4.53391e-05	0.0642455
ISM2;Isthmin-2	ISM2	Q6H9L7	0.00121048	0.00732963	0.868828	1	-0.00384029	0.00710269	0.588731	1	0.00210061	0.0054387	0.699326	1
IST1;IST1 homolog	IST1	P53990	0.032419	0.00721525	7.04068e-06	0.00997664	0.13888	0.00699184	2.55181e-87	3.61591e-84	0.00920555	0.00535382	0.0855439	1
ITGA11;Integrin alpha-11	ITGA11	Q9UKX5	0.122372	0.00706822	7.10241e-67	1.00641e-63	-0.111071	0.00684937	6.33276e-59	8.97352e-56	-0.00711456	0.00524473	0.174943	1
ITGA2;Integrin alpha-2	ITGA2	P17301	0.0767245	0.0069807	4.69255e-28	6.64935e-25	0.0693204	0.00676456	1.31373e-24	1.86155e-21	0.0122774	0.00517978	0.0177817	1
ITGA5;Integrin alpha-5	ITGA5	P08648	0.0292548	0.00661465	9.77557e-06	0.013852	0.136647	0.00640985	3.30331e-100	4.68078e-97	0.00242844	0.00490817	0.620762	1
ITGA6;Integrin alpha-6	ITGA6	P23229	0.0187722	0.00728742	0.00999994	1	0.0841712	0.00706178	1.0858e-32	1.53858e-29	0.00114021	0.00540737	0.832996	1
ITGAL;Integrin alpha-L	ITGAL	P20701	0.000334594	0.00716309	0.962744	1	0.0966251	0.0069413	6.23355e-44	8.83294e-41	-0.00320611	0.00531512	0.546376	1
ITGAM;Integrin alpha-M	ITGAM	P11215	0.0516519	0.00696659	1.25082e-13	1.77241e-10	-0.0710196	0.00675088	7.62875e-26	1.08099e-22	-0.00996299	0.00516931	0.053946	1
ITGAV;Integrin alpha-V	ITGAV	P06756	0.170924	0.00676091	9.067e-140	1.28479e-136	-0.0752136	0.00655157	1.87837e-30	2.66165e-27	-0.0116195	0.00501669	0.0205544	1
ITGAX;Integrin alpha-X	ITGAX	P20702	-0.00735846	0.00732617	0.315189	1	0.00276837	0.00709933	0.696577	1	0.00994419	0.00543612	0.0673661	1
ITGB1;Integrin beta-1	ITGB1	P05556	0.118433	0.006971	1.77971e-64	2.52184e-61	-0.0209007	0.00675516	0.00197606	1	0.00254392	0.00517259	0.622858	1
ITGB1BP1;Integrin beta-1-binding protein 1	ITGB1BP1	O14713	-0.000235635	0.00732179	0.974327	1	0.0401663	0.00709509	1.51528e-08	2.14715e-05	-0.00784605	0.00543288	0.148697	1
ITGB1BP2;Integrin beta-1-binding protein 2	ITGB1BP2	Q9UKP3	0.00906043	0.00728855	0.213837	1	0.0838124	0.00706287	2.03451e-32	2.88291e-29	0.000168492	0.00540821	0.975146	1
ITGB2;Integrin beta-2	ITGB2	P05107	0.0284682	0.00682779	3.06044e-05	0.0433665	-0.015923	0.00661638	0.0161071	1	-0.0103452	0.00506632	0.0411636	1
ITGB5;Integrin beta-5	ITGB5	P18084	0.0223838	0.00711627	0.00165973	1	0.0271751	0.00689593	8.1387e-05	0.115325	0.0106169	0.00528038	0.0443719	1
ITGB6;Integrin beta-6	ITGB6	P18564	0.0641654	0.00676705	2.64394e-21	3.74646e-18	0.0164953	0.00655752	0.0118914	1	-0.0220497	0.00502125	1.13014e-05	0.0160141
ITGB7;Integrin beta-7	ITGB7	P26010	0.00377565	0.00722729	0.601384	1	0.0101101	0.00700351	0.148868	1	-0.00737383	0.00536276	0.169138	1
ITGBL1;Integrin beta-like protein 1	ITGBL1	O95965	-0.099181	0.00681874	8.59833e-48	1.21838e-44	0.0730218	0.00660761	2.40887e-28	3.41337e-25	-0.0128955	0.0050596	0.0108162	1
ITIH1;Inter-alpha-trypsin inhibitor heavy chain H1	ITIH1	P19827	0.0265085	0.00730774	0.000286626	0.40615	0.0251824	0.00708147	0.0003769	0.534068	0.00322749	0.00542245	0.551708	1
ITIH3;Inter-alpha-trypsin inhibitor heavy chain H3	ITIH3	Q06033	0.0230204	0.00670609	0.000598154	0.847584	-0.155186	0.00649845	4.8196e-125	6.82937e-122	0.0358081	0.00497602	6.3178e-13	8.95233e-10
ITIH4;Inter-alpha-trypsin inhibitor heavy chain H4	ITIH4	Q14624	0.118949	0.00683256	1.34814e-67	1.91032e-64	0.0281287	0.006621	2.15843e-05	0.0305849	0.0286652	0.00506986	1.57922e-08	2.23776e-05
ITIH5;Inter-alpha-trypsin inhibitor heavy chain H5	ITIH5	Q86UX2	0.000563603	0.00732206	0.938645	1	-0.00888303	0.00709535	0.210596	1	-0.00436942	0.00543308	0.421272	1
ITM2A;Integral membrane protein 2A	ITM2A	O43736	-0.0312987	0.00729541	1.78995e-05	0.0253637	-0.0122737	0.00706953	0.0825472	1	0.00089179	0.0054133	0.869149	1
ITPA;Inosine triphosphate pyrophosphatase	ITPA	Q9BY32	0.00530245	0.00723568	0.463673	1	0.0966366	0.00701164	4.21433e-43	5.97171e-40	0.00682764	0.00536898	0.203494	1
ITPR1;Inositol 1,4,5-trisphosphate receptor type 1	ITPR1	Q14643	-0.0225636	0.00720023	0.00172743	1	0.174096	0.00697729	3.12191e-136	4.42374e-133	0.00492547	0.00534268	0.356582	1
ITPRIP;Inositol 1,4,5-trisphosphate receptor-interacting protein	ITPRIP	Q8IWB1	-0.00641858	0.00729696	0.379069	1	-0.0030125	0.00707102	0.670085	1	-0.00248939	0.00541445	0.645686	1
IVD;Isovaleryl-CoA dehydrogenase, mitochondrial	IVD	P26440	-0.00650388	0.00732602	0.374666	1	0.0213521	0.00709919	0.00263439	1	-0.0168675	0.00543602	0.00191771	1
IZUMO1;Izumo sperm-egg fusion protein 1	IZUMO1	Q8IYV9	-0.0052153	0.00727943	0.473723	1	-0.00370109	0.00705404	0.599811	1	-0.00583543	0.00540144	0.279996	1
JAM2;Junctional adhesion molecule B	JAM2	P57087	-0.0126582	0.00696407	0.069127	1	0.0536054	0.00674845	2.02574e-15	2.87048e-12	0.0131743	0.00516745	0.0107925	1
JAM3;Junctional adhesion molecule C	JAM3	Q9BX67	-0.0179214	0.00723506	0.0132529	1	0.132997	0.00701105	7.60624e-80	1.0778e-76	0.0144656	0.00536852	0.00705217	1
JCHAIN;Immunoglobulin J chain	JCHAIN	P01591	-0.0388151	0.00725801	8.95342e-08	0.00012687	0.0180915	0.00703328	0.0101076	1	0.0046156	0.00538555	0.391432	1
JMJD1C;Probable JmjC domain-containing histone demethylation protein 2C	JMJD1C	Q15652	0.00219431	0.00732471	0.764502	1	0.00173316	0.00709791	0.807094	1	-0.00900937	0.00543504	0.0973982	1
JPT2;Jupiter microtubule associated homolog 2	JPT2	Q9H910	0.027806	0.00727439	0.000132355	0.187547	0.0867848	0.00704915	9.27484e-35	1.31425e-31	-0.00606786	0.0053977	0.260954	1
JUN;Transcription factor AP-1	JUN	P05412	-0.0233067	0.00730826	0.00142845	1	0.0340699	0.00708198	1.50953e-06	0.002139	0.0045583	0.00542284	0.400592	1
KAZALD1;Kazal-type serine protease inhibitor domain-containing protein 1	KAZALD1	Q96I82	-0.0268413	0.00716014	0.000178027	0.252265	0.0301073	0.00693844	1.43395e-05	0.0203191	-0.00434973	0.00531293	0.412959	1
KAZN;Kazrin	KAZN	Q674X7	0.0258633	0.00722141	0.000342118	0.484781	0.140942	0.00699782	1.0364e-89	1.46859e-86	0.00298661	0.0053584	0.577278	1
KCNC4;Potassium voltage-gated channel subfamily C member 4	KCNC4	Q03721	0.00523251	0.00732406	0.474967	1	-0.00373649	0.00709729	0.598567	1	0.00399939	0.00543456	0.461786	1
KCNH2;Potassium voltage-gated channel subfamily H member 2	KCNH2	Q12809	-0.00864028	0.00732446	0.238149	1	0.0141659	0.00709768	0.0459576	1	0.000530069	0.00543486	0.922305	1
KCNIP4;Kv channel-interacting protein 4	KCNIP4	Q6PIL6	0.0076595	0.00732287	0.295582	1	-0.00265307	0.00709614	0.708499	1	0.00052979	0.00543368	0.922329	1
KCTD5;BTB/POZ domain-containing protein KCTD5	KCTD5	Q9NXV2	-0.0283805	0.00702401	5.34521e-05	0.0757417	0.139795	0.00680653	3.43849e-93	4.87234e-90	-0.00559938	0.00521192	0.282677	1
KDM3A;Lysine-specific demethylase 3A	KDM3A	Q9Y4C1	0.00383544	0.00730218	0.599415	1	-0.0101132	0.00707608	0.152952	1	-0.0028817	0.00541832	0.594837	1
KDR;Vascular endothelial growth factor receptor 2	KDR	P35968	0.0791015	0.00699964	1.46214e-29	2.07185e-26	0.16601	0.00678291	3.42708e-131	4.85618e-128	0.0175107	0.00519384	0.000748576	1
KEL;Kell blood group glycoprotein	KEL	P23276	-0.03608	0.00704178	3.01169e-07	0.000426756	0.0486942	0.00682375	9.79444e-13	1.38787e-09	-0.0138428	0.00522511	0.00806991	1
KHDC3L;KH domain-containing protein 3	KHDC3L	Q587J8	-0.00326178	0.00732919	0.656294	1	-0.00527728	0.00710226	0.457461	1	-0.00319629	0.00543837	0.556717	1
KHK;Ketohexokinase	KHK	P50053	-0.00471454	0.00688181	0.493302	1	0.176885	0.00666873	1.6317e-153	2.31213e-150	-0.0187617	0.0051064	0.000238997	0.338658
KIAA0319;Dyslexia-associated protein KIAA0319	KIAA0319	Q5VV43	0.067952	0.00707014	7.63229e-22	1.0815e-18	-0.0117	0.00685123	0.087697	1	0.0116396	0.00524615	0.0265133	1
KIAA1549;UPF0606 protein KIAA1549	KIAA1549	Q9HCM3	0.00343609	0.0073274	0.639118	1	0.0184177	0.00710053	0.00949485	1	-0.00986517	0.00543704	0.0696189	1
KIAA1549L;UPF0606 protein KIAA1549L	KIAA1549L	Q6ZVL6	-0.0163265	0.00731499	0.0256263	1	-0.0210765	0.0070885	0.00294784	1	-0.00355134	0.00542783	0.512933	1
KIAA2013;Uncharacterized protein KIAA2013	KIAA2013	Q8IYS2	-0.00587972	0.00732204	0.42197	1	0.00938738	0.00709533	0.185832	1	-0.00658534	0.00543306	0.225488	1
KIF1C;Kinesin-like protein KIF1C	KIF1C	O43896	-0.0053204	0.00723097	0.46187	1	0.0571933	0.00700708	3.39776e-16	4.81463e-13	-0.0018453	0.00536549	0.730908	1
KIF20B;Kinesin-like protein KIF20B	KIF20B	Q96Q89	0.00561294	0.00732721	0.443657	1	0.00289919	0.00710034	0.683043	1	-0.0039327	0.0054369	0.469479	1
KIF22;Kinesin-like protein KIF22	KIF22	Q14807	0.00955914	0.00722784	0.185995	1	0.0601826	0.00700404	8.84998e-18	1.25404e-14	0.000801996	0.00536316	0.88113	1
KIFBP;KIF-binding protein	KIFBP	Q96EK5	0.0323459	0.0072638	8.49269e-06	0.0120341	0.0919273	0.00703889	6.86976e-39	9.73445e-36	-0.0043818	0.00538985	0.416238	1
KIR2DL2;Killer cell immunoglobulin-like receptor 2DL2	KIR2DL2	P43627	-0.0336945	0.00720439	2.92272e-06	0.00414149	0.0106926	0.00698132	0.125629	1	0.0035718	0.00534576	0.504039	1
KIR2DL3;Killer cell immunoglobulin-like receptor 2DL3	KIR2DL3	P43628	-0.0375408	0.00719441	1.81834e-07	0.000257658	0.0175655	0.00697165	0.0117546	1	-0.00145536	0.00533836	0.785145	1
KIR2DS4;Killer cell immunoglobulin-like receptor 2DS4	KIR2DS4	P43632	0.00199305	0.00731792	0.785353	1	-0.00562786	0.00709133	0.427419	1	-0.00400138	0.00543	0.461187	1
KIR3DL1;Killer cell immunoglobulin-like receptor 3DL1	KIR3DL1	P43629	0.0217011	0.00730619	0.00297773	1	-0.00345752	0.00707997	0.625304	1	0.00297352	0.0054213	0.583361	1
KIR3DL2;Killer cell immunoglobulin-like receptor 3DL2	KIR3DL2	P43630	-0.0201381	0.00732733	0.00599244	1	0.0195598	0.00710045	0.00587705	1	0.000711583	0.00543699	0.895872	1
KIRREL1;Kin of IRRE-like protein 1	KIRREL1	Q96J84	0.00116781	0.00732723	0.873371	1	-0.00603141	0.00710036	0.395636	1	-0.00160935	0.00543691	0.767229	1
KIRREL2;Kin of IRRE-like protein 2	KIRREL2	Q6UWL6	-0.0142925	0.00714365	0.0454295	1	0.0141601	0.00692246	0.04081	1	-0.0047859	0.0053007	0.366595	1
KIT;Mast/stem cell growth factor receptor Kit	KIT	P10721	0.134208	0.00692165	2.56795e-83	3.63879e-80	-0.0937181	0.00670734	3.01315e-44	4.26963e-41	0.00741598	0.00513597	0.148768	1
KITLG;Kit ligand	KITLG	P21583	0.13269	0.00700576	1.32381e-79	1.87584e-76	-0.202355	0.00678884	7.90461e-193	1.12008e-189	0.0439418	0.00519838	2.94681e-17	4.17563e-14
KLB;Beta-klotho	KLB	Q86Z14	0.00512956	0.00722007	0.477424	1	-0.0789693	0.00699652	1.71059e-29	2.42391e-26	0.0114484	0.0053574	0.0326097	1
KLF4;Krueppel-like factor 4	KLF4	O43474	-0.0295513	0.00714621	3.55404e-05	0.0503607	0.133187	0.00692494	5.17133e-82	7.32777e-79	0.0108434	0.00530259	0.0408701	1
KLHL41;Kelch-like protein 41	KLHL41	O60662	-0.0191606	0.00716015	0.00745415	1	0.0198864	0.00693845	0.00415787	1	0.00346508	0.00531294	0.514278	1
KLK1;Kallikrein-1	KLK1	P06870	0.0213271	0.00729102	0.0034455	1	-0.0074682	0.00706527	0.290505	1	0.0105332	0.00541005	0.051546	1
KLK10;Kallikrein-10	KLK10	O43240	0.0626746	0.00712214	1.42947e-18	2.02556e-15	0.122562	0.00690162	2.99987e-70	4.25082e-67	0.012526	0.00528474	0.0177829	1
KLK11;Kallikrein-11	KLK11	Q9UBX7	-0.00763459	0.00719775	0.288837	1	0.0484375	0.00697489	3.86229e-12	5.47287e-09	-0.00051082	0.00534084	0.923804	1
KLK12;Kallikrein-12	KLK12	Q9UKR0	-0.00205537	0.00728639	0.777881	1	0.00416481	0.00706078	0.555294	1	0.00536632	0.00540661	0.320937	1
KLK13;Kallikrein-13	KLK13	Q9UKR3	0.0386855	0.00695225	2.6489e-08	3.75349e-05	0.0840247	0.00673699	1.2599e-35	1.78527e-32	0.00488338	0.00515868	0.343832	1
KLK14;Kallikrein-14	KLK14	Q9P0G3	0.0937255	0.00703402	2.08597e-40	2.95582e-37	-0.041868	0.00681623	8.21526e-10	1.1641e-06	0.0164236	0.00521935	0.0016527	1
KLK15;Kallikrein-15	KLK15	Q9H2R5	0.00407046	0.00725259	0.574636	1	0.0346357	0.00702803	8.33552e-07	0.00118114	0.00627449	0.00538153	0.24365	1
KLK3;Prostate-specific antigen	KLK3	P07288	-0.00123157	0.00423478	0.771188	1	-0.00344653	0.00410366	0.400989	1	-0.00277002	0.00314227	0.378034	1
KLK4;Kallikrein-4	KLK4	Q9Y5K2	-0.0248702	0.00684546	0.000280441	0.397384	-0.0322637	0.0066335	1.15681e-06	0.00163919	0.0129248	0.00507943	0.0109466	1
KLK6;Kallikrein-6	KLK6	Q92876	0.0551758	0.00714726	1.19537e-14	1.69384e-11	0.0239873	0.00692596	0.000534053	0.756753	0.00500308	0.00530337	0.345495	1
KLK7;Kallikrein-7	KLK7	P49862	0.0410162	0.00704014	5.72454e-09	8.11168e-06	0.0764305	0.00682215	4.39991e-29	6.23467e-26	0.0146596	0.00522389	0.00501459	1
KLK8;Kallikrein-8	KLK8	O60259	0.00732228	0.00702968	0.297593	1	0.0283487	0.00681202	3.16815e-05	0.0448926	0.00435822	0.00521613	0.403426	1
KLKB1;Plasma kallikrein	KLKB1	P03952	0.163161	0.00679153	1.62394e-126	2.30112e-123	0.124885	0.00658125	6.76933e-80	9.59214e-77	0.000743028	0.00503942	0.882783	1
KLRB1;Killer cell lectin-like receptor subfamily B member 1	KLRB1	Q12918	-0.121968	0.00695399	1.40606e-68	1.99238e-65	0.120897	0.00673867	1.18077e-71	1.67315e-68	0.00125232	0.00515996	0.80824	1
KLRC1;NKG2-A/NKG2-B type II integral membrane protein	KLRC1	P26715	0.00651589	0.00732426	0.37367	1	-0.0226587	0.00709748	0.00141174	1	0.00125716	0.00543471	0.817067	1
KLRD1;Natural killer cells antigen CD94	KLRD1	Q13241	-0.0300949	0.00696992	1.58005e-05	0.0223893	0.0943192	0.00675411	3.35762e-44	4.75774e-41	0.00407455	0.00517178	0.430794	1
KLRF1;Killer cell lectin-like receptor subfamily F member 1	KLRF1	Q9NZS2	-0.0393179	0.00708364	2.86867e-08	4.06491e-05	0.0783619	0.00686431	3.9376e-30	5.57959e-27	-0.00217716	0.00525617	0.678723	1
KLRK1;NKG2-D type II integral membrane protein	KLRK1	P26718	-0.0592004	0.00728905	4.74037e-16	6.71711e-13	0.050713	0.00706336	7.1234e-13	1.00939e-09	-0.00396962	0.00540859	0.462985	1
KRT14;Keratin, type I cytoskeletal 14	KRT14	P02533	0.00164834	0.00731898	0.821814	1	0.0146135	0.00709236	0.0393619	1	-0.00228363	0.00543079	0.674125	1
KRT17;Keratin, type I cytoskeletal 17	KRT17	Q04695	-0.00787102	0.00732897	0.282848	1	0.013956	0.00710205	0.0494145	1	-0.000117572	0.00543821	0.982752	1
KRT18;Keratin, type I cytoskeletal 18	KRT18	P05783	-0.028834	0.00647355	8.44943e-06	0.0119728	0.140048	0.00627312	1.21345e-109	1.71946e-106	-0.0329186	0.00480347	7.34626e-12	1.04096e-08
KRT19;Keratin, type I cytoskeletal 19	KRT19	P08727	-0.0993074	0.00707706	1.30433e-44	1.84823e-41	0.0597867	0.00685794	2.95614e-18	4.18885e-15	0.0245673	0.00525129	2.90283e-06	0.00411331
KRT5;Keratin, type II cytoskeletal 5	KRT5	P13647	-0.0303793	0.00690822	1.09797e-05	0.0155582	0.128608	0.00669433	7.77983e-82	1.1024e-78	0.0234585	0.005126	4.74741e-06	0.00672708
KRT6C;Keratin, type II cytoskeletal 6C	KRT6C	P48668	-0.0109447	0.00729763	0.133687	1	0.00645001	0.00707167	0.361727	1	0.0067904	0.00541495	0.209847	1
KRT8;Keratin, type II cytoskeletal 8	KRT8	P05787	-0.0467613	0.00705104	3.36344e-11	4.76599e-08	0.00867499	0.00683272	0.204227	1	-0.0280998	0.00523198	7.88951e-08	0.000111794
KYAT1;Kynurenine--oxoglutarate transaminase 1	KYAT1	Q16773	0.0148044	0.00721842	0.0402824	1	0.123265	0.00699492	3.302e-69	4.67893e-66	-0.00606947	0.00535618	0.25715	1
KYNU;Kynureninase	KYNU	Q16719	0.0260293	0.00675113	0.000115679	0.163918	0.181405	0.0065421	1.97424e-167	2.7975e-164	-0.0184418	0.00500944	0.000232302	0.329172
L1CAM;Neural cell adhesion molecule L1	L1CAM	P32004	0.0515212	0.00700978	2.02645e-13	2.87148e-10	-0.00164337	0.00679274	0.808836	1	-0.0033808	0.00520136	0.515706	1
L3HYPDH;Trans-3-hydroxy-L-proline dehydratase	L3HYPDH	Q96EM0	0.0148724	0.00723801	0.0399087	1	0.119448	0.0070139	8.91507e-65	1.26326e-61	0.00496888	0.00537071	0.354878	1
LACRT;Extracellular glycoprotein lacritin	LACRT	Q9GZZ8	-0.00141564	0.00716432	0.843362	1	0.0788837	0.00694249	7.24973e-30	1.02729e-26	0.023344	0.00531603	1.13034e-05	0.016017
LACTB2;Endoribonuclease LACTB2	LACTB2	Q53H82	0.0256499	0.00725501	0.00040757	0.577526	0.0996871	0.00703038	1.63791e-45	2.32092e-42	-1.68354e-05	0.00538333	0.997505	1
LAG3;Lymphocyte activation gene 3 protein	LAG3	P18627	-0.0230016	0.00703777	0.00108295	1	-0.0312185	0.00681986	4.71975e-06	0.00668789	0.0081786	0.00522213	0.117325	1
LAIR1;Leukocyte-associated immunoglobulin-like receptor 1	LAIR1	Q6GTX8	-0.0967675	0.00670497	4.42173e-47	6.26559e-44	0.0767087	0.00649736	4.17183e-32	5.91149e-29	0.0229652	0.00497518	3.92695e-06	0.00556449
LAIR2;Leukocyte-associated immunoglobulin-like receptor 2	LAIR2	Q6ISS4	-0.0384418	0.00725846	1.18988e-07	0.000168606	0.0442972	0.00703371	3.05371e-10	4.32711e-07	0.00789814	0.00538588	0.142534	1
LAMA1;Laminin subunit alpha-1	LAMA1	P25391	0.00965488	0.00731912	0.187134	1	-0.0099733	0.0070925	0.159681	1	0.00187615	0.0054309	0.729752	1
LAMA4;Laminin subunit alpha-4	LAMA4	Q16363	0.0228638	0.00715511	0.00139737	1	0.0996383	0.00693357	1.07562e-46	1.52415e-43	0.0162671	0.0053092	0.00218607	1
LAMB1;Laminin subunit beta-1	LAMB1	P07942	0.00868809	0.00714954	0.2243	1	0.0789781	0.00692817	4.74487e-30	6.72348e-27	-0.00181263	0.00530507	0.732594	1
LAMP1;Lysosome-associated membrane glycoprotein 1	LAMP1	P11279	0.033015	0.00714945	3.89125e-06	0.0055139	0.0929284	0.00692808	6.36965e-41	9.02579e-38	-0.0172259	0.00530499	0.00116694	1
LAMP2;Lysosome-associated membrane glycoprotein 2	LAMP2	P13473	0.0690788	0.00668924	5.78352e-25	8.19525e-22	0.189504	0.00648212	1.15918e-185	1.64255e-182	-0.0189804	0.00496351	0.000131536	0.186387
LAMP3;Lysosome-associated membrane glycoprotein 3	LAMP3	Q9UQV4	-0.0261505	0.00636722	4.01656e-05	0.0569147	0.057826	0.00617008	7.52532e-21	1.06634e-17	-0.00121755	0.00472457	0.796636	1
LAMTOR5;Ragulator complex protein LAMTOR5	LAMTOR5	O43504	0.0276928	0.00731705	0.000154152	0.218434	-0.0130851	0.00709049	0.0649824	1	-0.0163548	0.00542936	0.00259465	1
LAP3;Cytosol aminopeptidase	LAP3	P28838	0.0124756	0.00724353	0.085023	1	0.087546	0.00701925	1.25789e-35	1.78242e-32	-0.00751875	0.00537481	0.161856	1
LARP1;La-related protein 1	LARP1	Q6PKG0	-0.018858	0.00727927	0.00958346	1	0.116132	0.00705389	1.13126e-60	1.603e-57	-0.00361189	0.00540133	0.503688	1
LAT;Linker for activation of T-cells family member 1	LAT	O43561	-0.0212951	0.00720982	0.00314272	1	0.162531	0.00698659	8.21496e-119	1.16406e-115	0.00089559	0.0053498	0.867051	1
LAT2;Linker for activation of T-cells family member 2	LAT2	Q9GZY6	-0.00614272	0.00714753	0.390115	1	0.197343	0.00692622	1.48072e-176	2.09818e-173	0.000181397	0.00530357	0.972716	1
LATS1;Serine/threonine-protein kinase LATS1	LATS1	O95835	-0.00889924	0.00711113	0.210778	1	0.223742	0.00689095	6.74416e-228	9.55647e-225	0.0133118	0.00527656	0.0116464	1
LAYN;Layilin	LAYN	Q6UX15	-0.0699226	0.00676685	5.41919e-25	7.67899e-22	0.0274461	0.00655733	2.8515e-05	0.0404058	0.0123653	0.00502111	0.0137959	1
LBP;Lipopolysaccharide-binding protein	LBP	P18428	-0.00884374	0.00708614	0.212027	1	-0.0534959	0.00686674	6.85173e-15	9.7089e-12	0.00421184	0.00525802	0.423119	1
LBR;Delta(14)-sterol reductase LBR	LBR	Q14739	-0.0349169	0.00711908	9.39855e-07	0.00133177	0.159441	0.00689865	2.62045e-117	3.71318e-114	0.0145318	0.00528246	0.00594531	1
LCAT;Phosphatidylcholine-sterol acyltransferase	LCAT	P04180	0.206111	0.00629151	6.62447e-232	9.38687e-229	0.222729	0.0060967	7.70137e-287	1.09128e-283	0.0265285	0.00466839	1.33724e-08	1.89487e-05
LCN15;Lipocalin-15	LCN15	Q6UWW0	-0.0144207	0.00724805	0.0466433	1	0.0180604	0.00702363	0.0101337	1	0.000253095	0.00537816	0.962466	1
LCN2;Neutrophil gelatinase-associated lipocalin	LCN2	P80188	-0.0808511	0.00699737	7.96246e-31	1.12828e-27	0.0505058	0.00678071	9.65976e-14	1.36879e-10	0.0295633	0.00519215	1.25192e-08	1.77397e-05
LCP1;Plastin-2	LCP1	P13796	0.0179361	0.00715292	0.0121624	1	0.0493541	0.00693144	1.09735e-12	1.55495e-09	0.0147356	0.00530757	0.00550034	1
LDLR;Low-density lipoprotein receptor	LDLR	P01130	0.0728843	0.0054818	3.06655e-40	4.3453e-37	0.53202	0.00531207	0	0	0.0105449	0.00406758	0.00953429	1
LDLRAP1;Low density lipoprotein receptor adapter protein 1	LDLRAP1	Q5SW96	0.00795627	0.00717277	0.267337	1	0.182948	0.00695068	3.21125e-151	4.55034e-148	0.0174264	0.0053223	0.00106057	1
LECT2;Leukocyte cell-derived chemotaxin-2	LECT2	O14960	-0.022497	0.00618112	0.000273418	0.387433	0.193402	0.00598974	1.95489e-225	2.77008e-222	0.00567334	0.00458649	0.216107	1
LEFTY2;Left-right determination factor 2	LEFTY2	O00292	0.0277421	0.0067618	4.09158e-05	0.0579777	0.119292	0.00655244	1.01366e-73	1.43636e-70	0.0141306	0.00501736	0.0048601	1
LEG1;Protein LEG1 homolog	LEG1	Q6P5S2	-0.0121674	0.00722122	0.0920075	1	-0.012996	0.00699764	0.063291	1	0.00230305	0.00535826	0.667334	1
LELP1;Late cornified envelope-like proline-rich protein 1	LELP1	Q5T871	0.0048266	0.00732876	0.510168	1	0.00278575	0.00710184	0.69487	1	0.00426198	0.00543805	0.433202	1
LEO1;RNA polymerase-associated protein LEO1	LEO1	Q8WVC0	-0.00654539	0.00729844	0.369821	1	0.0334758	0.00707246	2.218e-06	0.0031429	-0.0132912	0.00541555	0.0141218	1
LEP;Leptin	LEP	P41159	0.0227128	0.004234	8.17343e-08	0.000115817	0.0837534	0.0041029	4.35671e-92	6.17346e-89	0.00403775	0.00314169	0.198725	1
LEPR;Leptin receptor	LEPR	P48357	0.0654652	0.00687086	1.70285e-21	2.41294e-18	-0.0791758	0.00665812	1.5103e-32	2.1401e-29	0.0147693	0.00509828	0.00377074	1
LETM1;Mitochondrial proton/calcium exchanger protein	LETM1	O95202	-0.0556688	0.00722533	1.34604e-14	1.90734e-11	0.107482	0.00700162	5.17727e-53	7.3362e-50	0.0167469	0.0053613	0.00178766	1
LGALS1;Galectin-1	LGALS1	P09382	0.0589565	0.00663093	6.3296e-19	8.96905e-16	0.10084	0.00642562	2.58212e-55	3.65886e-52	0.00757648	0.00492025	0.123604	1
LGALS3;Galectin-3	LGALS3	P17931	0.057374	0.00684344	5.31227e-17	7.52748e-14	0.0756273	0.00663154	4.50007e-30	6.3766e-27	0.0364077	0.00507793	7.65912e-13	1.0853e-09
LGALS3BP;Galectin-3-binding protein	LGALS3BP	Q08380	-0.0135232	0.00688987	0.0496813	1	0.0951978	0.00667654	5.32594e-46	7.54686e-43	0.00317255	0.00511238	0.534892	1
LGALS4;Galectin-4	LGALS4	P56470	-0.135857	0.00671167	1.37142e-90	1.9433e-87	0.104285	0.00650386	1.17727e-57	1.66819e-54	0.0443592	0.00498016	5.47956e-19	7.76454e-16
LGALS7_LGALS7B;Galectin-7	LGALS7	P47929	-0.00491293	0.00695253	0.479795	1	0.0728619	0.00673726	3.23324e-27	4.5815e-24	0.0170666	0.00515888	0.000939886	1
LGALS8;Galectin-8	LGALS8	O00214	-0.0120993	0.00722873	0.0941834	1	0.137284	0.0070049	4.55029e-85	6.44776e-82	0.00166535	0.00536382	0.7562	1
LGALS9;Galectin-9	LGALS9	O00182	-0.0299806	0.00638706	2.68966e-06	0.00381124	0.140589	0.0061893	2.08844e-113	2.95932e-110	0.0269084	0.00473929	1.37574e-08	1.94943e-05
LGMN;Legumain	LGMN	Q99538	-0.00300705	0.0071083	0.672273	1	0.0943727	0.0068882	1.29445e-42	1.83424e-39	-0.00268107	0.00527446	0.611237	1
LHB;Lutropin subunit beta	LHB	P01229	0.0115607	0.00705391	0.101243	1	0.0317772	0.0068355	3.35002e-06	0.00474698	0.0064027	0.00523411	0.221237	1
LHPP;Phospholysine phosphohistidine inorganic pyrophosphate phosphatase	LHPP	Q9H008	0.00949351	0.00716593	0.185242	1	0.0703868	0.00694405	4.11553e-24	5.83171e-21	-0.0144732	0.00531723	0.00649316	1
LIF;Leukemia inhibitory factor	LIF	P15018	-0.0325783	0.00729373	7.97142e-06	0.0112955	0.0548369	0.0070679	8.81934e-15	1.2497e-11	-0.00127427	0.00541206	0.813861	1
LIFR;Leukemia inhibitory factor receptor	LIFR	P42702	-0.0472531	0.00718839	4.98243e-11	7.0601e-08	0.00679475	0.00696582	0.329348	1	-0.00743109	0.0053339	0.163573	1
LILRA2;Leukocyte immunoglobulin-like receptor subfamily A member 2	LILRA2	Q8N149	-0.00104434	0.00694733	0.880511	1	0.0673808	0.00673222	1.50074e-23	2.12654e-20	0.0287006	0.00515502	2.60305e-08	3.68852e-05
LILRA3;Leukocyte immunoglobulin-like receptor subfamily A member 3	LILRA3	Q8N6C8	-0.0160568	0.0073057	0.0279668	1	0.0105236	0.0070795	0.137158	1	0.00597335	0.00542094	0.270512	1
LILRA4;Leukocyte immunoglobulin-like receptor subfamily A member 4	LILRA4	P59901	0.009405	0.007316	0.198612	1	-0.0136885	0.00708947	0.0535139	1	-0.00959899	0.00542858	0.0770308	1
LILRA5;Leukocyte immunoglobulin-like receptor subfamily A member 5	LILRA5	A6NI73	-0.0124441	0.00680663	0.0675242	1	0.031922	0.00659588	1.30587e-06	0.00185042	0.0275095	0.00505062	5.16385e-08	7.31717e-05
LILRA6;Leukocyte immunoglobulin-like receptor subfamily A member 6	LILRA6	Q6PI73	-0.014047	0.00728201	0.0537383	1	0.0235006	0.00705654	0.0008683	1	0.00973832	0.00540336	0.0715113	1
LILRB1;Leukocyte immunoglobulin-like receptor subfamily B member 1	LILRB1	Q8NHL6	-0.020143	0.0070332	0.00418598	1	0.0374285	0.00681543	4.00772e-08	5.67893e-05	0.0110389	0.00521874	0.0344156	1
LILRB2;Leukocyte immunoglobulin-like receptor subfamily B member 2	LILRB2	Q8N423	-0.018131	0.00714002	0.0111104	1	0.0307783	0.00691894	8.67713e-06	0.0122955	0.0204477	0.005298	0.000113812	0.161272
LILRB4;Leukocyte immunoglobulin-like receptor subfamily B member 4	LILRB4	Q8NHJ6	-0.094124	0.00672654	2.26353e-44	3.20743e-41	0.167315	0.00651826	5.53174e-144	7.83847e-141	0.020292	0.00499119	4.8021e-05	0.0680458
LILRB5;Leukocyte immunoglobulin-like receptor subfamily B member 5	LILRB5	O75023	0.0277828	0.00727838	0.000135221	0.191609	0.0138839	0.00705302	0.0490184	1	0.00715057	0.00540066	0.185506	1
LIPF;Gastric triacylglycerol lipase	LIPF	P07098	0.0670539	0.00710014	3.79974e-21	5.38424e-18	0.0339256	0.0068803	8.22543e-07	0.00116554	0.0121877	0.00526841	0.0207088	1
LMNB1;Lamin-B1	LMNB1	P20700	0.00544811	0.00722516	0.450826	1	0.0519901	0.00700145	1.14791e-13	1.62659e-10	0.00851847	0.00536118	0.112088	1
LMNB2;Lamin-B2	LMNB2	Q03252	-0.0289507	0.00679477	2.0429e-05	0.0289479	0.0655667	0.00658438	2.50026e-23	3.54287e-20	0.00947845	0.00504182	0.0601208	1
LMOD1;Leiomodin-1	LMOD1	P29536	-0.012127	0.00672587	0.0713905	1	-0.024224	0.00651762	0.000202156	0.286456	0.00754416	0.0049907	0.130633	1
LMOD2;Leiomodin-2	LMOD2	Q6P5Q4	-0.00673073	0.00731982	0.357829	1	-0.00167562	0.00709317	0.813255	1	-0.00703591	0.00543141	0.195187	1
LONP1;Lon protease homolog, mitochondrial	LONP1	P36776	-0.021359	0.00722644	0.00312202	1	0.102794	0.00700269	1.22016e-48	1.72896e-45	0.0151505	0.00536213	0.00472388	1
LPCAT2;Lysophosphatidylcholine acyltransferase 2	LPCAT2	Q7L5N7	-0.0175152	0.0072659	0.0159314	1	0.0525762	0.00704093	8.37956e-14	1.18738e-10	0.010099	0.00539141	0.0610548	1
LPL;Lipoprotein lipase	LPL	P06858	0.0788491	0.0060976	3.66609e-38	5.19485e-35	-0.280676	0.0059088	0	0	0.0148426	0.00452451	0.00103731	1
LPO;Lactoperoxidase	LPO	P22079	-0.0132814	0.00697927	0.0570505	1	0.00439499	0.00676317	0.515799	1	-0.00774613	0.00517872	0.134725	1
LPP;Lipoma-preferred partner	LPP	Q93052	0.0166239	0.0072651	0.0221329	1	0.112689	0.00704015	1.83131e-57	2.59497e-54	0.00128944	0.00539081	0.810957	1
LRCH4;Leucine-rich repeat and calponin homology domain-containing protein 4	LRCH4	O75427	-0.0658911	0.00705265	9.91876e-21	1.40549e-17	0.24215	0.00683428	3.11416e-270	4.41277e-267	0.0205599	0.00523317	8.55435e-05	0.121215
LRFN2;Leucine-rich repeat and fibronectin type-III domain-containing protein 2	LRFN2	Q9ULH4	-0.00890597	0.00731447	0.223391	1	-0.00193876	0.007088	0.78445	1	-0.00453229	0.00542745	0.403684	1
LRG1;Leucine-rich alpha-2-glycoprotein	LRG1	P02750	-0.0169735	0.00694563	0.0145397	1	-0.0608853	0.00673057	1.55567e-19	2.20439e-16	0.0608027	0.00515376	4.60691e-32	6.52799e-29
LRIG1;Leucine-rich repeats and immunoglobulin-like domains protein 1	LRIG1	Q96JA1	-0.0235388	0.00710218	0.000919653	1	0.0262243	0.00688228	0.000138977	0.19693	0.0255692	0.00526993	1.22806e-06	0.00174016
LRIG3;Leucine-rich repeats and immunoglobulin-like domains protein 3	LRIG3	Q6UXM1	0.00501	0.00718767	0.485791	1	0.073706	0.00696512	3.94591e-26	5.59135e-23	-0.00192744	0.00533336	0.717808	1
LRP1;Prolow-density lipoprotein receptor-related protein 1	LRP1	Q07954	0.0858626	0.00699957	1.60523e-34	2.27461e-31	-0.0485852	0.00678285	8.05043e-13	1.14075e-09	0.00622758	0.00519379	0.230519	1
LRP11;Low-density lipoprotein receptor-related protein 11	LRP11	Q86VZ4	-0.0545095	0.0069797	5.88926e-15	8.34508e-12	0.122543	0.00676359	4.92387e-73	6.97712e-70	0.0226881	0.00517904	1.1861e-05	0.016807
LRP2;Low-density lipoprotein receptor-related protein 2	LRP2	P98164	0.0131226	0.00732842	0.073358	1	-0.00122465	0.00710151	0.863086	1	-0.00475729	0.00543779	0.381658	1
LRP2BP;LRP2-binding protein	LRP2BP	Q9P2M1	-0.00227891	0.00731955	0.755539	1	0.000383933	0.00709292	0.956833	1	-0.00877085	0.00543122	0.106342	1
LRPAP1;Alpha-2-macroglobulin receptor-associated protein	LRPAP1	P30533	0.0172136	0.00718724	0.0166247	1	0.115495	0.00696471	1.58445e-61	2.24516e-58	-0.0012968	0.00533304	0.807881	1
LRRC25;Leucine-rich repeat-containing protein 25	LRRC25	Q8N386	-0.0117572	0.00704365	0.0950875	1	0.0428103	0.00682556	3.60446e-10	5.10753e-07	0.00117459	0.00522649	0.822185	1
LRRC37A2;Leucine-rich repeat-containing protein 37A2	LRRC37A2	A6NM11	0.0208325	0.00723874	0.00400549	1	0.0666466	0.00701461	2.20271e-21	3.12124e-18	0.00920895	0.00537125	0.0864477	1
LRRC38;Leucine-rich repeat-containing protein 38	LRRC38	Q5VT99	-0.0145717	0.00714916	0.0415332	1	0.0486294	0.00692781	2.2677e-12	3.21333e-09	-0.00640678	0.00530479	0.227157	1
LRRC59;Leucine-rich repeat-containing protein 59	LRRC59	Q96AG4	-0.0152934	0.00723189	0.0344613	1	0.14456	0.00700798	5.54168e-94	7.85256e-91	0.00761348	0.00536617	0.155969	1
LRRFIP1;Leucine-rich repeat flightless-interacting protein 1	LRRFIP1	Q32MZ4	-0.0112225	0.00723916	0.12109	1	0.133614	0.00701502	1.77241e-80	2.51151e-77	-0.000518247	0.00537157	0.92314	1
LRRN1;Leucine-rich repeat neuronal protein 1	LRRN1	Q6UXK5	0.110036	0.00709797	5.03344e-54	7.13239e-51	-0.00266877	0.00687819	0.698015	1	-0.0164155	0.0052668	0.00182976	1
LRTM1;Leucine-rich repeat and transmembrane domain-containing protein 1	LRTM1	Q9HBL6	0.0037913	0.00732357	0.604682	1	0.00594229	0.00709682	0.402419	1	0.00354334	0.0054342	0.514377	1
LRTM2;Leucine-rich repeat and transmembrane domain-containing protein 2	LRTM2	Q8N967	0.072203	0.00687672	9.46587e-26	1.34131e-22	-0.0374405	0.0066638	1.94084e-08	2.75017e-05	-0.00442394	0.00510263	0.385952	1
LSM1;U6 snRNA-associated Sm-like protein LSm1	LSM1	O15116	-0.00108984	0.00732455	0.881718	1	0.0245574	0.00709776	0.000541041	0.766655	-0.00736377	0.00543492	0.175459	1
LSM8;U6 snRNA-associated Sm-like protein LSm8	LSM8	O95777	-0.0132702	0.00730352	0.069232	1	0.0098107	0.00707738	0.165693	1	-0.00828175	0.00541932	0.126474	1
LSP1;Lymphocyte-specific protein 1	LSP1	P33241	-0.0758405	0.00694322	9.91813e-28	1.4054e-24	0.192411	0.00672824	7.77942e-178	1.10234e-174	0.00478089	0.00515197	0.353428	1
LTA;Lymphotoxin-alpha	LTA	P01374	-0.0650435	0.00711113	6.17474e-20	8.74961e-17	0.0832133	0.00689095	1.65271e-33	2.34189e-30	-0.0115505	0.00527657	0.0286022	1
LTA4H;Leukotriene A-4 hydrolase	LTA4H	P09960	0.019692	0.00705893	0.00527923	1	0.0238045	0.00684036	0.000502019	0.711361	-0.00295625	0.00523783	0.572483	1
LTB;Lymphotoxin-beta	LTB	Q06643	-0.00444253	0.00725391	0.540255	1	0.0503215	0.00702931	8.29661e-13	1.17563e-09	-0.01491	0.00538251	0.00560698	1
LTBP2;Latent-transforming growth factor beta-binding protein 2	LTBP2	Q14767	0.024427	0.0061081	6.37073e-05	0.0902732	-0.0755966	0.00591897	2.84642e-37	4.03338e-34	0.00208111	0.0045323	0.646113	1
LTBP3;Latent-transforming growth factor beta-binding protein 3	LTBP3	Q9NS15	0.0130863	0.00695602	0.0599396	1	0.0718093	0.00674064	1.8486e-26	2.61946e-23	-0.00584392	0.00516147	0.257549	1
LTBR;Tumor necrosis factor receptor superfamily member 3	LTBR	P36941	-0.0442572	0.00702052	2.93527e-10	4.15927e-07	0.00990923	0.00680314	0.145245	1	0.00581902	0.00520933	0.263985	1
LTO1;Protein LTO1 homolog	LTO1	Q8WV07	0.000864182	0.00732532	0.906091	1	0.0110651	0.00709851	0.119056	1	-0.00363363	0.0054355	0.503819	1
LUZP2;Leucine zipper protein 2	LUZP2	Q86TE4	0.0144326	0.00718018	0.044433	1	0.0300546	0.00695786	1.56803e-05	0.022219	-0.0015669	0.0053278	0.768683	1
LXN;Latexin	LXN	Q9BS40	0.0136266	0.00726304	0.0606415	1	-0.0323082	0.00703816	4.43836e-06	0.00628916	-0.0216474	0.00538929	5.91268e-05	0.0837826
LY6D;Lymphocyte antigen 6D	LY6D	Q14210	0.00193837	0.00710534	0.785005	1	0.0243353	0.00688534	0.000409285	0.579957	0.00950371	0.00527227	0.0714619	1
LY75;Lymphocyte antigen 75	LY75	O60449	0.0171574	0.00720765	0.0172973	1	0.0438059	0.00698448	3.60817e-10	5.11278e-07	-0.00930664	0.00534818	0.0818414	1
LY9;T-lymphocyte surface antigen Ly-9	LY9	Q9HBG7	-0.0410209	0.0072062	1.26227e-08	1.78864e-05	0.0535127	0.00698307	1.85983e-14	2.63538e-11	-0.0150323	0.0053471	0.00493706	1
LY96;Lymphocyte antigen 96	LY96	Q9Y6Y9	-0.0759172	0.00712821	1.90761e-26	2.70309e-23	0.0486363	0.0069075	1.9423e-12	2.75224e-09	0.00431998	0.00528924	0.414077	1
LYAR;Cell growth-regulating nucleolar protein	LYAR	Q9NX58	-0.0314567	0.00730982	1.68693e-05	0.0239037	0.0741282	0.00708349	1.36469e-25	1.93376e-22	0.00685237	0.00542399	0.206474	1
LYN;Tyrosine-protein kinase Lyn	LYN	P07948	-0.0133956	0.00721383	0.0633292	1	0.153849	0.00699047	1.25203e-106	1.77412e-103	-0.00133983	0.00535277	0.802352	1
LYPD1;Ly6/PLAUR domain-containing protein 1	LYPD1	Q8N2G4	0.00774765	0.00732317	0.290079	1	-0.00716291	0.00709642	0.312804	1	0.00700591	0.0054339	0.197303	1
LYPD3;Ly6/PLAUR domain-containing protein 3	LYPD3	O95274	0.0159594	0.00721703	0.0270182	1	0.0169438	0.00699357	0.015408	1	-0.00921588	0.00535514	0.0852706	1
LYPD8;Ly6/PLAUR domain-containing protein 8	LYPD8	Q6UX82	-0.0457605	0.00721379	2.2736e-10	3.22169e-07	0.0507228	0.00699043	4.0682e-13	5.76464e-10	0.00337736	0.00535274	0.528072	1
LYPLA2;Acyl-protein thioesterase 2	LYPLA2	O95372	-0.00918986	0.00732579	0.209686	1	0.0129035	0.00709896	0.0691244	1	0.0005811	0.00543584	0.914868	1
LYSMD3;LysM and putative peptidoglycan-binding domain-containing protein 3	LYSMD3	Q7Z3D4	0.0027659	0.0073076	0.705064	1	0.0404507	0.00708134	1.12356e-08	1.59209e-05	0.00240669	0.00542235	0.657157	1
LYVE1;Lymphatic vessel endothelial hyaluronic acid receptor 1	LYVE1	Q9Y5Y7	-0.0364404	0.00713029	3.22727e-07	0.000457304	-0.00625866	0.00690951	0.365046	1	0.00664456	0.00529078	0.209169	1
LYZL2;Lysozyme-like protein 2	LYZL2	Q7Z4W2	0.00433252	0.00678711	0.523253	1	0.0359125	0.00657696	4.78398e-08	6.7789e-05	-0.00698136	0.00503614	0.165679	1
LZTFL1;Leucine zipper transcription factor-like protein 1	LZTFL1	Q9NQ48	0.0174808	0.0072097	0.0153291	1	0.150115	0.00698647	9.36816e-102	1.32747e-98	0.0122189	0.00534971	0.022376	1
M6PR;Cation-dependent mannose-6-phosphate receptor	M6PR	P20645	-0.0169965	0.00731979	0.0202394	1	0.0471555	0.00709315	3.01369e-11	4.27039e-08	0.00615253	0.0054314	0.257318	1
MAD1L1;Mitotic spindle assembly checkpoint protein MAD1	MAD1L1	Q9Y6D9	-0.0761502	0.00688662	2.24027e-28	3.17446e-25	0.227912	0.00667339	1.57625e-251	2.23355e-248	0.020289	0.00510997	7.18734e-05	0.101845
MAEA;E3 ubiquitin-protein transferase MAEA	MAEA	Q7L5Y9	-0.0116868	0.00731688	0.110222	1	0.042858	0.00709033	1.5131e-09	2.14407e-06	-0.00946827	0.00542923	0.0811776	1
MAG;Myelin-associated glycoprotein	MAG	P20916	0.0128833	0.00732565	0.0786457	1	-0.00688684	0.00709883	0.331984	1	-0.00063502	0.00543574	0.907001	1
MAGEA3;Melanoma-associated antigen 3	MAGEA3	P43357	0.00285236	0.00732949	0.697159	1	0.00055812	0.00710255	0.937367	1	-0.00471186	0.00543859	0.38629	1
MAGED1;Melanoma-associated antigen D1	MAGED1	Q9Y5V3	-0.00570159	0.00730166	0.434889	1	0.083146	0.00707558	7.99014e-32	1.1322e-28	-0.00375881	0.00541794	0.48783	1
MAMDC2;MAM domain-containing protein 2	MAMDC2	Q7Z304	-0.0216731	0.00707604	0.00219379	1	0.00644487	0.00685695	0.347273	1	-0.0154902	0.00525053	0.00317767	1
MAMDC4;Apical endosomal glycoprotein	MAMDC4	Q6UXC1	-0.0434105	0.00693452	3.89281e-10	5.51611e-07	0.182321	0.00671981	1.85092e-160	2.62275e-157	-0.0007925	0.00514552	0.877597	1
MAN1A2;Mannosyl-oligosaccharide 1,2-alpha-mannosidase IB	MAN1A2	O60476	0.126269	0.00679612	1.09561e-76	1.55248e-73	0.117422	0.00658569	8.48448e-71	1.20225e-67	0.0174396	0.00504282	0.00054424	0.771188
MAN2B2;Epididymis-specific alpha-mannosidase	MAN2B2	Q9Y2E5	0.0153638	0.00706283	0.0296141	1	0.055803	0.00684414	3.65438e-16	5.17825e-13	-0.035461	0.00524072	1.34062e-11	1.89966e-08
MANEAL;Glycoprotein endo-alpha-1,2-mannosidase-like protein	MANEAL	Q5VSG8	0.00735577	0.00732355	0.315193	1	0.0190466	0.0070968	0.00728194	1	0.00349076	0.00543419	0.520637	1
MANF;Mesencephalic astrocyte-derived neurotrophic factor	MANF	P55145	0.0381029	0.00727637	1.64572e-07	0.000233198	0.0763116	0.00705107	2.96654e-27	4.20359e-24	-0.000294248	0.00539918	0.956538	1
MANSC1;MANSC domain-containing protein 1	MANSC1	Q9H8J5	-0.0884551	0.00720303	1.36073e-34	1.92815e-31	-0.0270523	0.00698	0.000106514	0.150931	0.0227486	0.00534475	2.08427e-05	0.0295342
MANSC4;MANSC domain-containing protein 4	MANSC4	A6NHS7	-0.00455058	0.00717759	0.526086	1	0.024041	0.00695535	0.000547928	0.776414	6.73098e-05	0.00532588	0.989916	1
MAP1LC3A;Microtubule-associated proteins 1A/1B light chain 3A	MAP1LC3A	Q9H492	0.0144821	0.0073261	0.0480745	1	-0.00882062	0.00709926	0.214072	1	-0.0113021	0.00543607	0.0376158	1
MAP1LC3B2;Microtubule-associated proteins 1A/1B light chain 3 beta 2	MAP1LC3B2	A6NCE7	-0.00820675	0.00732727	0.262709	1	0.00312206	0.0071004	0.660155	1	0.000466548	0.00543695	0.931617	1
MAP2;Microtubule-associated protein 2	MAP2	P11137	-0.000565194	0.00724322	0.937804	1	0.114895	0.00701895	5.28396e-60	7.48737e-57	0.00765579	0.00537457	0.154326	1
MAP2K1;Dual specificity mitogen-activated protein kinase kinase 1	MAP2K1	Q02750	-0.0204116	0.00723136	0.00476554	1	0.124971	0.00700745	7.89131e-71	1.1182e-67	0.0141345	0.00536577	0.00843721	1
MAP2K6;Dual specificity mitogen-activated protein kinase kinase 6	MAP2K6	P52564	0.043738	0.00728002	1.89731e-09	2.68848e-06	0.0761128	0.00705461	4.27362e-27	6.05572e-24	-0.00035605	0.00540189	0.947448	1
MAP3K5;Mitogen-activated protein kinase kinase kinase 5	MAP3K5	Q99683	0.0346087	0.00728583	2.04077e-06	0.00289177	0.0758518	0.00706024	6.99778e-27	9.91585e-24	0.000672523	0.0054062	0.901	1
MAP4K5;Mitogen-activated protein kinase kinase kinase kinase 5	MAP4K5	Q9Y4K4	0.0161983	0.00724836	0.0254399	1	0.126059	0.00702393	1.05616e-71	1.49657e-68	-0.00468605	0.00537839	0.383611	1
MAPK13;Mitogen-activated protein kinase 13	MAPK13	O15264	-0.00881108	0.00730993	0.228073	1	0.0347085	0.00708359	9.63369e-07	0.00136509	0.000647884	0.00542407	0.904923	1
MAPK9;Mitogen-activated protein kinase 9	MAPK9	P45984	0.0266116	0.00713741	0.000192949	0.273409	0.164971	0.00691641	9.41108e-125	1.33355e-121	0.000522178	0.00529606	0.921458	1
MAPKAPK2;MAP kinase-activated protein kinase 2	MAPKAPK2	P49137	0.0290775	0.00726773	6.32278e-05	0.0895938	0.0946186	0.0070427	4.76026e-41	6.7453e-38	-0.00265884	0.00539276	0.621988	1
MAPRE3;Microtubule-associated protein RP/EB family member 3	MAPRE3	Q9UPY8	-0.0192219	0.00729302	0.00840094	1	-0.00440805	0.0070672	0.532806	1	-0.00207888	0.00541153	0.700864	1
MAPT;Microtubule-associated protein tau	MAPT	P10636	0.00614541	0.00732757	0.401661	1	-0.00337838	0.00710069	0.634233	1	-0.0050311	0.00543717	0.354808	1
MARCO;Macrophage receptor MARCO	MARCO	Q9UEW3	0.0135578	0.00695263	0.0511815	1	0.0922682	0.00673736	1.39812e-42	1.98114e-39	0.0294082	0.00515896	1.20469e-08	1.70704e-05
MARS1;Methionine--tRNA ligase, cytoplasmic	MARS1	P56192	0.025878	0.00724106	0.000352322	0.49924	0.111177	0.00701685	2.41284e-56	3.41899e-53	-0.00530295	0.00537297	0.323665	1
MASP1;Mannan-binding lectin serine protease 1	MASP1	P48740	0.0298326	0.00707829	2.50766e-05	0.0355335	0.137631	0.00685912	4.66775e-89	6.6142e-86	-0.0323969	0.00525219	6.97904e-10	9.8893e-07
MATN2;Matrilin-2	MATN2	O00339	0.0207889	0.00699816	0.00297398	1	0.113214	0.00678148	2.49059e-62	3.52916e-59	0.00994269	0.00519274	0.0555351	1
MATN3;Matrilin-3	MATN3	O15232	-0.00429415	0.00705954	0.543008	1	-0.00975686	0.00684096	0.153807	1	0.00973695	0.00523828	0.0630632	1
MAVS;Mitochondrial antiviral-signaling protein	MAVS	Q7Z434	0.0237956	0.00727064	0.00106576	1	0.0958015	0.00704552	5.28867e-42	7.49404e-39	0.0040792	0.00539492	0.449583	1
MAX;Protein max	MAX	P61244	0.0243722	0.00724109	0.000763983	1	0.1062	0.00701689	1.38604e-51	1.96402e-48	-0.00116718	0.005373	0.82803	1
MB;Myoglobin	MB	P02144	-0.00795087	0.00635613	0.21098	1	-0.00552351	0.00615933	0.369847	1	-0.00204971	0.00471634	0.663857	1
MBL2;Mannose-binding protein C	MBL2	P11226	0.0315302	0.00721402	1.24213e-05	0.017601	-0.0660184	0.00699066	3.80789e-21	5.39578e-18	-0.00763539	0.00535291	0.153762	1
MCAM;Cell surface glycoprotein MUC18	MCAM	P43121	0.10267	0.00684802	1.17487e-50	1.66479e-47	-0.146738	0.00663599	1.29618e-107	1.83669e-104	-0.00034787	0.00508133	0.94542	1
MCEE;Methylmalonyl-CoA epimerase, mitochondrial	MCEE	Q96PE7	0.0205003	0.00732723	0.00514758	1	-0.0218839	0.00710036	0.0020572	1	-0.0137998	0.00543691	0.0111478	1
MCEMP1;Mast cell-expressed membrane protein 1	MCEMP1	Q8IX19	0.0207519	0.00724156	0.00416371	1	0.0894671	0.00701734	3.79362e-37	5.37555e-34	-0.00336012	0.00537334	0.531758	1
MCFD2;Multiple coagulation factor deficiency protein 2	MCFD2	Q8NI22	-0.00808576	0.00726101	0.265464	1	0.106683	0.00703619	9.19173e-52	1.30247e-48	0.00683289	0.00538778	0.204727	1
MCTS1;Malignant T-cell-amplified sequence 1	MCTS1	Q9ULC4	0.0161782	0.00728679	0.026411	1	0.0602646	0.00706117	1.46117e-17	2.07048e-14	0.0010944	0.0054069	0.839598	1
MDGA1;MAM domain-containing glycosylphosphatidylinositol anchor protein 1	MDGA1	Q8NFP4	0.0414196	0.00707518	4.83526e-09	6.85156e-06	0.00981977	0.00685611	0.152077	1	-0.00145371	0.00524989	0.781856	1
MDH1;Malate dehydrogenase, cytoplasmic	MDH1	P40925	0.00682188	0.007181	0.342123	1	0.1234	0.00695865	4.67773e-70	6.62835e-67	-0.00222474	0.00532841	0.676298	1
MDK;Midkine	MDK	P21741	-0.0337795	0.00713965	2.23996e-06	0.00317403	0.12103	0.00691858	3.12406e-68	4.4268e-65	0.00798597	0.00529772	0.131709	1
MDM1;Nuclear protein MDM1	MDM1	Q8TC05	0.0206021	0.00731432	0.00485496	1	0.0514638	0.00708785	3.92608e-13	5.56326e-10	-0.00344885	0.00542733	0.525133	1
MECR;Enoyl-[acyl-carrier-protein] reductase, mitochondrial	MECR	Q9BV79	-0.0125493	0.00725716	0.0837777	1	0.0806945	0.00703246	2.00506e-30	2.84116e-27	0.0150626	0.00538492	0.00515788	1
MED18;Mediator of RNA polymerase II transcription subunit 18	MED18	Q9BUE0	0.0353755	0.0072684	1.13783e-06	0.00161231	0.0935175	0.00704335	3.90875e-40	5.5387e-37	-0.00197869	0.00539326	0.713709	1
MED21;Mediator of RNA polymerase II transcription subunit 21	MED21	Q13503	-0.00998083	0.00732589	0.173079	1	0.0154244	0.00709906	0.0298065	1	-0.0019711	0.00543592	0.716901	1
MEGF10;Multiple epidermal growth factor-like domains protein 10	MEGF10	Q96KG7	0.0823512	0.00716679	1.66578e-30	2.36042e-27	0.0372563	0.00694489	8.16529e-08	0.000115702	0.0221182	0.00531787	3.20076e-05	0.0453547
MEGF11;Multiple epidermal growth factor-like domains protein 11	MEGF11	A6BM72	0.00416573	0.0073031	0.568407	1	0.0131222	0.00707698	0.0637185	1	0.000869115	0.00541901	0.872581	1
MEGF9;Multiple epidermal growth factor-like domains protein 9	MEGF9	Q9H1U4	0.0537423	0.00694621	1.04555e-14	1.48154e-11	0.163764	0.00673114	1.12959e-129	1.60063e-126	0.0170315	0.00515419	0.000952762	1
MELTF;Melanotransferrin	MELTF	P08582	0.0328458	0.00717689	4.74173e-06	0.00671903	0.0243929	0.00695467	0.000453056	0.64198	0.00517094	0.00532536	0.331553	1
MENT;Protein MENT	MENT	Q9BUN1	0.1085	0.0067745	1.57835e-57	2.23653e-54	-0.125975	0.00656474	1.17895e-81	1.67058e-78	0.0264042	0.00502678	1.5074e-07	0.000213599
MEP1A;Meprin A subunit alpha	MEP1A	Q16819	-0.0932614	0.00692012	2.70962e-41	3.83953e-38	0.197369	0.00670586	4.02384e-188	5.70178e-185	-0.0209619	0.00513483	4.4693e-05	0.0633299
MEP1B;Meprin A subunit beta	MEP1B	Q16820	0.0415694	0.00716526	6.6275e-09	9.39116e-06	0.0556184	0.0069434	1.17967e-15	1.67159e-12	-0.0162332	0.00531673	0.00226556	1
MEPE;Matrix extracellular phosphoglycoprotein	MEPE	Q9NQ76	0.0140876	0.00685498	0.0398781	1	0.0214817	0.00664273	0.0012224	1	0.00231163	0.0050865	0.649498	1
MERTK;Tyrosine-protein kinase Mer	MERTK	Q12866	0.00747724	0.00697068	0.283427	1	0.0245121	0.00675485	0.000285121	0.404017	-0.00339655	0.00517235	0.511395	1
MESD;LRP chaperone MESD	MESD	Q14696	0.027633	0.00727131	0.000144773	0.205144	0.0880299	0.00704617	9.6691e-36	1.37011e-32	-0.00154956	0.00539542	0.773962	1
MET;Hepatocyte growth factor receptor	MET	P08581	0.0994514	0.00695396	2.88941e-46	4.09429e-43	-0.0688037	0.00673864	1.92795e-24	2.73191e-21	0.0252252	0.00515994	1.01972e-06	0.00144495
METAP1;Methionine aminopeptidase 1	METAP1	P53582	-0.00284375	0.00732669	0.697918	1	0.0125673	0.00709984	0.0767222	1	-0.00852686	0.00543652	0.116787	1
METAP1D;Methionine aminopeptidase 1D, mitochondrial	METAP1D	Q6UB28	0.00388208	0.00726684	0.593193	1	0.0926782	0.00704184	1.82114e-39	2.58056e-36	0.00210732	0.0053921	0.695935	1
METAP2;Methionine aminopeptidase 2	METAP2	P50579	0.0101129	0.00720092	0.16021	1	0.134737	0.00697796	1.20892e-82	1.71303e-79	0.000163721	0.00534319	0.975556	1
MFAP3;Microfibril-associated glycoprotein 3	MFAP3	P55082	-0.0133937	0.00732832	0.0676077	1	0.00649465	0.00710142	0.360431	1	0.00433276	0.00543772	0.425575	1
MFAP3L;Microfibrillar-associated protein 3-like	MFAP3L	O75121	0.0038202	0.00732166	0.601836	1	-0.000443476	0.00709496	0.95016	1	0.00355158	0.00543278	0.51329	1
MFAP4;Microfibril-associated glycoprotein 4	MFAP4	P55083	-0.0428324	0.0069732	8.21367e-10	1.16388e-06	0.00888818	0.00675729	0.188402	1	-0.0148103	0.00517422	0.00420799	1
MFAP5;Microfibrillar-associated protein 5	MFAP5	Q13361	-0.0113067	0.00665504	0.0893338	1	0.116294	0.00644898	2.27615e-72	3.2253e-69	0.0248081	0.00493814	5.0915e-07	0.000721465
MFGE8;Lactadherin	MFGE8	Q08431	-0.163903	0.00625576	7.2073e-150	1.02127e-146	0.537608	0.00606207	0	0	-0.000109243	0.00464187	0.981224	1
MGLL;Monoglyceride lipase	MGLL	Q99685	0.0260083	0.00725327	0.000336584	0.47694	0.120224	0.00702869	2.51499e-65	3.56374e-62	0.0245147	0.00538204	5.25833e-06	0.00745106
MGMT;Methylated-DNA--protein-cysteine methyltransferase	MGMT	P16455	0.0450182	0.00728551	6.51564e-10	9.23266e-07	0.0668783	0.00705993	2.88417e-21	4.08687e-18	-0.0104436	0.00540596	0.0533834	1
MIA;Melanoma-derived growth regulatory protein	MIA	Q16674	0.0434392	0.00714211	1.19818e-09	1.69782e-06	0.0805524	0.00692097	2.98231e-31	4.22593e-28	0.0155106	0.00529955	0.00342717	1
MICALL2;MICAL-like protein 2	MICALL2	Q8IY33	0.0178268	0.00729334	0.0145199	1	0.0814895	0.00706752	1.05558e-30	1.49576e-27	0.000739295	0.00541176	0.891341	1
MICB_MICA;MHC class I polypeptide-related sequence A_MHC class I polypeptide-related sequence B	MICB_MICA	Q29980_Q29983	-0.0170681	0.00727135	0.018915	1	0.0139444	0.0070462	0.0478252	1	0.000865541	0.00539545	0.872551	1
MIF;Macrophage migration inhibitory factor	MIF	P14174	0.0177691	0.00725195	0.0142805	1	0.0995621	0.00702741	1.93567e-45	2.74284e-42	-0.00295015	0.00538105	0.583526	1
MILR1;Allergin-1	MILR1	Q7Z6M3	-0.103293	0.00717686	7.83251e-47	1.10987e-43	0.0158851	0.00695464	0.0223712	1	0.000560221	0.00532533	0.916218	1
MINDY1;Ubiquitin carboxyl-terminal hydrolase MINDY-1	MINDY1	Q8N5J2	0.0249645	0.00729121	0.000617952	0.875638	0.0782247	0.00706545	1.92323e-28	2.72522e-25	0.00452995	0.00541019	0.40243	1
MINK1;Misshapen-like kinase 1	MINK1	Q8N4C8	0.0337582	0.00722164	2.95638e-06	0.00418919	0.138484	0.00699804	1.09697e-86	1.5544e-83	0.0045921	0.00535857	0.391471	1
MITD1;MIT domain-containing protein 1	MITD1	Q8WV92	0.0206414	0.00725368	0.00443472	1	0.114524	0.00702909	1.82833e-59	2.59075e-56	-0.000811619	0.00538234	0.88014	1
MKI67;Proliferation marker protein Ki-67	MKI67	P46013	-0.0235366	0.00732003	0.00130391	1	0.0453044	0.00709338	1.71442e-10	2.42934e-07	-0.00456591	0.00543157	0.400564	1
MLLT1;Protein ENL	MLLT1	Q03111	0.00835025	0.00732696	0.254436	1	0.00096629	0.0071001	0.891747	1	-0.00275003	0.00543672	0.612983	1
MLN;Promotilin	MLN	P12872	0.0119951	0.00666283	0.0718229	1	0.142465	0.00645653	3.62818e-107	5.14113e-104	0.0313468	0.00494392	2.31823e-10	3.28493e-07
MME;Neprilysin	MME	P08473	-0.00179998	0.0067804	0.790651	1	0.1746	0.00657046	4.55143e-154	6.44937e-151	-0.0192244	0.00503116	0.000133107	0.188612
MMP1;Interstitial collagenase	MMP1	P03956	-0.0424857	0.00721177	3.86965e-09	5.48329e-06	0.112448	0.00698847	4.79254e-58	6.79102e-55	0.0159488	0.00535124	0.0028807	1
MMP10;Stromelysin-2	MMP10	P09238	-0.0597068	0.0071413	6.45675e-17	9.14922e-14	-0.0837055	0.00692019	1.29529e-33	1.83543e-30	0.00532744	0.00529895	0.314723	1
MMP12;Macrophage metalloelastase	MMP12	P39900	0.00100547	0.00654608	0.877927	1	0.0773775	0.00634339	3.72759e-34	5.282e-31	0.0228014	0.00485729	2.68578e-06	0.00380575
MMP13;Collagenase 3	MMP13	P45452	0.0260049	0.00724528	0.000332127	0.470623	-0.0331449	0.00702094	2.35748e-06	0.00334055	-0.0134366	0.0053761	0.0124477	1
MMP15;Matrix metalloproteinase-15	MMP15	P51511	-0.00230481	0.00732712	0.753099	1	0.00883602	0.00710025	0.213337	1	0.00714122	0.00543683	0.189027	1
MMP3;Stromelysin-1	MMP3	P08254	0.0144222	0.00571604	0.0116366	1	-0.0694647	0.00553905	5.3235e-36	7.5434e-33	-0.0142473	0.00424139	0.00078275	1
MMP7;Matrilysin	MMP7	P09237	0.0375147	0.00683322	4.04584e-08	5.73295e-05	0.10299	0.00662164	2.28098e-54	3.23215e-51	0.0168756	0.00507035	0.000874703	1
MMP8;Neutrophil collagenase	MMP8	P22894	-0.0573665	0.00714409	1.00542e-15	1.42468e-12	0.0813147	0.00692289	8.51067e-32	1.20596e-28	0.015606	0.00530102	0.00324252	1
MMP9;Matrix metalloproteinase-9	MMP9	P14780	-0.0592742	0.0070529	4.46579e-17	6.32803e-14	0.077236	0.00683452	1.46086e-29	2.07004e-26	0.00877057	0.00523336	0.0937671	1
MMUT;Methylmalonyl-CoA mutase, mitochondrial	MMUT	P22033	-0.00950592	0.00732265	0.194243	1	0.0236216	0.00709592	0.000872792	1	-0.00185658	0.00543351	0.732586	1
MN1;Transcriptional activator MN1	MN1	Q10571	0.000550509	0.00732523	0.940094	1	-0.0158292	0.00709842	0.0257562	1	-0.00457387	0.00543543	0.400077	1
MNAT1;CDK-activating kinase assembly factor MAT1	MNAT1	P51948	-0.00560809	0.00731775	0.443463	1	0.0388777	0.00709117	4.22118e-08	5.98141e-05	0.00274715	0.00542988	0.612907	1
MNDA;Myeloid cell nuclear differentiation antigen	MNDA	P41218	-0.058281	0.00723545	8.20067e-16	1.16204e-12	0.112521	0.00701142	9.42466e-58	1.33547e-54	0.00806325	0.00536881	0.13314	1
MOCS2;Molybdopterin synthase catalytic subunit	MOCS2	O96007	0.00662392	0.00720192	0.357713	1	0.118386	0.00697893	2.76046e-64	3.91157e-61	0.00375977	0.00534393	0.481712	1
MOG;Myelin-oligodendrocyte glycoprotein	MOG	Q16653	0.117191	0.00681258	4.7659e-66	6.75328e-63	0.0150491	0.00660164	0.0226376	1	0.00789206	0.00505503	0.118479	1
MORC3;MORC family CW-type zinc finger protein 3	MORC3	Q14149	-0.0152868	0.00732891	0.0370017	1	0.0133707	0.00710198	0.0597526	1	-0.0020635	0.00543816	0.704357	1
MORF4L1;Mortality factor 4-like protein 1	MORF4L1	Q9UBU8	-0.0146037	0.00732555	0.0462119	1	-0.00557892	0.00709873	0.431929	1	-0.00222445	0.00543567	0.682371	1
MORF4L2;Mortality factor 4-like protein 2	MORF4L2	Q15014	-0.0208572	0.00731632	0.00436381	1	-0.00252044	0.00708979	0.722215	1	-0.00595001	0.00542882	0.273084	1
MORN4;MORN repeat-containing protein 4	MORN4	Q8NDC4	-0.00652023	0.0073294	0.373687	1	0.00370248	0.00710246	0.602164	1	-0.00501732	0.00543853	0.356247	1
MPHOSPH8;M-phase phosphoprotein 8	MPHOSPH8	Q99549	0.0143875	0.00723294	0.0466909	1	0.130437	0.00700899	6.24648e-77	8.85126e-74	0.00538076	0.00536695	0.316074	1
MPI;Mannose-6-phosphate isomerase	MPI	P34949	0.0382548	0.00723803	1.26277e-07	0.000178934	0.0862147	0.00701392	1.17853e-34	1.66997e-31	-0.000660577	0.00537073	0.902111	1
MPIG6B;Megakaryocyte and platelet inhibitory receptor G6b	MPIG6B	O95866	0.0324686	0.00727968	8.21476e-06	0.0116403	0.0806666	0.00705428	3.15558e-30	4.47145e-27	0.00841156	0.00540163	0.119426	1
MPO;Myeloperoxidase	MPO	P05164	-0.0479258	0.00715708	2.17007e-11	3.07499e-08	0.0789737	0.00693548	5.4831e-30	7.76955e-27	0.00633662	0.00531066	0.232803	1
MPRIP;Myosin phosphatase Rho-interacting protein	MPRIP	Q6WCQ1	0.066044	0.00720867	5.37417e-20	7.6152e-17	0.109536	0.00698547	3.15758e-55	4.47428e-52	-0.00371259	0.00534894	0.487637	1
MRC1;Macrophage mannose receptor 1	MRC1	P22897	-0.0427389	0.00671213	1.94598e-10	2.75745e-07	0.0785232	0.0065043	1.71844e-33	2.43502e-30	0.0329401	0.0049805	3.79895e-11	5.38311e-08
MRI1;Methylthioribose-1-phosphate isomerase	MRI1	Q9BV20	0.018013	0.00721828	0.0125834	1	0.110438	0.00699478	5.79265e-56	8.20818e-53	0.00475716	0.00535607	0.374449	1
MRPL24;39S ribosomal protein L24, mitochondrial	MRPL24	Q96A35	-0.0174802	0.00731707	0.0169014	1	0.0403088	0.00709051	1.31923e-08	1.86935e-05	0.00474341	0.00542937	0.38231	1
MRPL28;39S ribosomal protein L28, mitochondrial	MRPL28	Q13084	0.00533316	0.00732876	0.4668	1	-0.00196038	0.00710184	0.78252	1	-0.0126824	0.00543805	0.0196976	1
MRPL46;39S ribosomal protein L46, mitochondrial	MRPL46	Q9H2W6	0.00371093	0.00731566	0.611976	1	0.049302	0.00708915	3.59795e-12	5.09829e-09	-0.00840922	0.00542833	0.121358	1
MRPL52;39S ribosomal protein L52, mitochondrial	MRPL52	Q86TS9	0.0103119	0.00732707	0.159328	1	0.00598864	0.00710021	0.398985	1	0.00283342	0.0054368	0.602261	1
MRPL58;Peptidyl-tRNA hydrolase ICT1, mitochondrial	MRPL58	Q14197	-0.0214485	0.00730249	0.00331453	1	0.050192	0.00707638	1.33813e-12	1.89613e-09	0.0147944	0.00541855	0.00633051	1
MRPS16;28S ribosomal protein S16, mitochondrial	MRPS16	Q9Y3D3	0.00493406	0.00731798	0.500164	1	0.00886396	0.00709139	0.211322	1	-0.00785433	0.00543005	0.148058	1
MSLN;Mesothelin	MSLN	Q13421	0.00971714	0.00663761	0.143216	1	0.0148319	0.00643209	0.0211211	1	-0.00450711	0.00492521	0.36014	1
MSLNL;Mesothelin-like protein	MSLNL	Q96KJ4	0.00641466	0.00731993	0.380858	1	-0.00368125	0.00709328	0.60378	1	-0.00663222	0.00543149	0.222069	1
MSMB;Beta-microseminoprotein	MSMB	P08118	-0.00597674	0.00664929	0.368737	1	0.0030172	0.00644341	0.639601	1	0.00538601	0.00493387	0.274999	1
MSR1;Macrophage scavenger receptor types I and II	MSR1	P21757	-0.0236185	0.00660968	0.000352962	0.500147	0.110619	0.00640503	1.47355e-66	2.08802e-63	0.011199	0.00490448	0.0224116	1
MSRA;Mitochondrial peptide methionine sulfoxide reductase	MSRA	Q9UJ68	0.040378	0.00723885	2.45147e-08	3.47373e-05	0.104643	0.00701471	3.60495e-50	5.10821e-47	-0.00366849	0.00537133	0.494627	1
MST1;Hepatocyte growth factor-like protein	MST1	P26927	0.037501	0.00728986	2.69989e-07	0.000382574	0.0325824	0.00706414	3.99499e-06	0.00566091	0.012844	0.00540918	0.0175789	1
MSTN;Growth/differentiation factor 8	MSTN	O14793	0.0154407	0.00656073	0.0186029	1	0.0854556	0.00635759	4.36035e-41	6.17861e-38	-0.0150451	0.00486816	0.00199972	1
MTDH;Protein LYRIC	MTDH	Q86UE4	-0.0454351	0.0071603	2.2451e-10	3.18131e-07	0.169579	0.0069386	7.92706e-131	1.12326e-127	0.0117976	0.00531305	0.0263918	1
MTHFD2;Bifunctional methylenetetrahydrofolate dehydrogenase/cyclohydrolase, mitochondrial	MTHFD2	P13995	-0.0227289	0.00732284	0.00191183	1	-0.000475352	0.00709611	0.946592	1	0.00310704	0.00543366	0.567452	1
MTHFSD;Methenyltetrahydrofolate synthase domain-containing protein	MTHFSD	Q2M296	0.0186983	0.00717881	0.00920059	1	0.166036	0.00695654	6.52421e-125	9.2448e-122	0.00901532	0.00532679	0.0905689	1
MTIF3;Translation initiation factor IF-3, mitochondrial	MTIF3	Q9H2K0	0.00073407	0.00726186	0.919483	1	0.0947603	0.00703702	3.13679e-41	4.44483e-38	0.0127691	0.00538841	0.017806	1
MTPN;Myotrophin	MTPN	P58546	0.0275029	0.00732274	0.000173048	0.245209	0.0153441	0.00709601	0.0305979	1	-0.00746547	0.00543358	0.169466	1
MTR;Methionine synthase	MTR	Q99707	0.000907327	0.00732375	0.901404	1	0.0158115	0.00709698	0.0258925	1	0.00084691	0.00543433	0.876156	1
MTSS1;Protein MTSS 1	MTSS1	O43312	-0.0435135	0.00719086	1.45199e-09	2.05747e-06	0.205174	0.00696821	2.85761e-188	4.04923e-185	0.0260157	0.00533572	1.08864e-06	0.0015426
MTSS2;Protein MTSS 2	MTSS2	Q765P7	-0.00333884	0.00718878	0.642327	1	0.182008	0.0069662	4.70396e-149	6.66551e-146	0.0152845	0.00533418	0.00416734	1
MTUS1;Microtubule-associated tumor suppressor 1	MTUS1	Q9ULD2	-0.0247044	0.00709975	0.00050275	0.712396	0.0836314	0.00687992	6.24465e-34	8.84867e-31	-0.0058818	0.00526812	0.26422	1
MUC13;Mucin-13	MUC13	Q9H3R2	-0.0777243	0.00698017	9.46391e-29	1.34104e-25	0.192546	0.00676405	3.06084e-176	4.33721e-173	-0.00469255	0.00517939	0.36494	1
MUC16;Mucin-16	MUC16	Q8WXI7	0.00687651	0.0073097	0.346846	1	0.0341386	0.00708337	1.44488e-06	0.0020474	-0.00432291	0.00542391	0.42545	1
MUC2;Mucin-2	MUC2	Q02817	0.0534854	0.00723893	1.51684e-13	2.14936e-10	0.0177812	0.00701479	0.0112548	1	-0.00660347	0.00537139	0.218939	1
MUCL3;Mucin-like protein 3	MUCL3	Q3MIW9	0.00135776	0.00732296	0.852908	1	-0.00264223	0.00709622	0.709639	1	0.000580007	0.00543375	0.914994	1
MVK;Mevalonate kinase	MVK	Q03426	-0.062068	0.00684676	1.30482e-19	1.84893e-16	0.199424	0.00663476	5.2413e-196	7.42692e-193	0.00862401	0.0050804	0.0896095	1
MXRA8;Matrix remodeling-associated protein 8	MXRA8	Q9BRK3	0.0814359	0.00633203	9.08059e-38	1.28672e-34	-0.207639	0.00613597	4.69501e-247	6.65283e-244	0.0137998	0.00469846	0.0033152	1
MYBPC1;Myosin-binding protein C, slow-type	MYBPC1	Q00872	-0.0610906	0.00676363	1.76552e-19	2.50174e-16	0.0254252	0.00655421	0.000104986	0.148765	0.00667214	0.00501872	0.183708	1
MYBPC2;Myosin-binding protein C, fast-type	MYBPC2	Q14324	-0.0307804	0.00709275	1.43073e-05	0.0202735	0.00596578	0.00687314	0.385409	1	-0.0109317	0.00526293	0.0377974	1
MYCBP2;E3 ubiquitin-protein ligase MYCBP2	MYCBP2	O75592	-0.044019	0.00726215	1.36285e-09	1.93116e-06	0.123227	0.0070373	2.31888e-68	3.28585e-65	0.0185775	0.00538863	0.000566372	0.802549
MYDGF;Myeloid-derived growth factor	MYDGF	Q969H8	0.0102035	0.00719907	0.156392	1	0.13047	0.00697616	1.1303e-77	1.60164e-74	-0.00307733	0.00534181	0.564562	1
MYH4;Myosin-4	MYH4	Q9Y623	0.00485949	0.00732686	0.507179	1	-0.0125114	0.0071	0.0780505	1	0.0102914	0.00543664	0.0583697	1
MYH7B;Myosin-7B	MYH7B	A7E2Y1	0.00240067	0.00732109	0.74298	1	-0.0209427	0.00709441	0.0031593	1	-0.00070952	0.00543236	0.896085	1
MYH9;Myosin-9	MYH9	P35579	-0.00427913	0.00712126	0.547913	1	0.204512	0.00690077	1.12501e-190	1.59414e-187	0.00718232	0.00528408	0.17408	1
MYL1;Myosin light chain 1/3, skeletal muscle isoform	MYL1	P05976	-0.01717	0.00725572	0.0179673	1	-0.017423	0.00703106	0.0132167	1	0.00525662	0.00538385	0.328889	1
MYL3;Myosin light chain 3	MYL11	Q96A32	-0.048734	0.00677648	6.52849e-13	9.25087e-10	-0.00722748	0.00656666	0.271064	1	-0.000243342	0.00502825	0.961402	1
MYL4;Myosin light chain 4	MYL3	P08590	-0.0598332	0.0071769	7.89807e-17	1.11916e-13	0.050964	0.00695468	2.3859e-13	3.38082e-10	-0.0122316	0.00532536	0.0216328	1
MYL6B;Myosin light chain 6B	MYL4	P12829	-0.0150258	0.007313	0.0399183	1	-0.00720236	0.00708657	0.309475	1	-0.00590938	0.00542635	0.276155	1
MYLPF;Myosin regulatory light chain 2, skeletal muscle isoform	MYL6B	P14649	-0.0118865	0.00708152	0.0932539	1	0.00286146	0.00686225	0.676692	1	0.000256907	0.00525459	0.961006	1
MYO6;Unconventional myosin-VI	MYO6	Q9UM54	0.00265315	0.00732765	0.717299	1	0.0174872	0.00710076	0.0137936	1	0.00115092	0.00543722	0.832362	1
MYO9B;Unconventional myosin-IXb	MYO9B	Q13459	0.0223281	0.0072813	0.00216749	1	0.0873329	0.00705585	4.09954e-35	5.80904e-32	0.0107005	0.00540283	0.0476516	1
MYOC;Myocilin	MYOC	Q99972	0.0373724	0.00705501	1.18247e-07	0.000167556	-0.000468225	0.00683657	0.945397	1	0.00227773	0.00523492	0.663491	1
MYOM1;Myomesin-1	MYOM1	P52179	0.000497874	0.00731925	0.945768	1	0.0390815	0.00709262	3.60998e-08	5.11535e-05	-0.00219385	0.00543099	0.686252	1
MYOM2;Myomesin-2	MYOM2	P54296	-0.0292738	0.00716714	4.42798e-05	0.0627445	-0.0276393	0.00694523	6.91674e-05	0.0980102	-0.005502	0.00531813	0.300875	1
MYOM3;Myomesin-3	MYOM3	Q5VTT5	-0.0151735	0.0068272	0.0262558	1	-0.0451528	0.00661581	8.93554e-12	1.26617e-08	-0.000919607	0.00506588	0.855953	1
MZB1;Marginal zone B- and B1-cell-specific protein	MZB1	Q8WU39	-0.137945	0.00701596	1.32328e-85	1.87509e-82	0.0586356	0.00679873	6.70171e-18	9.49632e-15	0.0193766	0.00520595	0.000197952	0.280498
MZT1;Mitotic-spindle organizing protein 1	MZT1	Q08AG7	0.0491455	0.00729881	1.68325e-11	2.38517e-08	0.0427844	0.00707282	1.47096e-09	2.08435e-06	-0.0079408	0.00541583	0.142597	1
NAA10;N-alpha-acetyltransferase 10	NAA10	P41227	0.0151306	0.00730421	0.0383207	1	0.0665237	0.00707805	5.85082e-21	8.29062e-18	-0.00356171	0.00541983	0.511081	1
NAA80;N-alpha-acetyltransferase 80	NAA80	Q93015	0.0259415	0.00714799	0.000284709	0.403432	0.177692	0.00692667	8.14438e-144	1.15406e-140	0.00979063	0.00530392	0.0649117	1
NAAA;N-acylethanolamine-hydrolyzing acid amidase	NAAA	Q02083	0.0501854	0.0072535	4.63323e-12	6.56528e-09	-0.012655	0.00702891	0.0718039	1	-0.0186089	0.00538221	0.00054589	0.773526
NACC1;Nucleus accumbens-associated protein 1	NACC1	Q96RE7	0.0275226	0.0072096	0.000135044	0.191357	0.1185	0.00698637	2.84482e-64	4.03111e-61	0.00787439	0.00534963	0.141044	1
NADK;NAD kinase	NADK	O95544	-0.042904	0.00706436	1.26586e-09	1.79373e-06	0.111311	0.00684563	3.10792e-59	4.40393e-56	0.00584284	0.00524186	0.265008	1
NAGA;Alpha-N-acetylgalactosaminidase	NAGA	P17050	0.0145754	0.00728836	0.0455275	1	0.045411	0.0070627	1.29485e-10	1.8348e-07	-0.0133187	0.00540807	0.0137929	1
NAGK;N-acetyl-D-glucosamine kinase	NAGK	Q9UJ70	0.00460163	0.00712332	0.518286	1	0.144175	0.00690276	2.7221e-96	3.85722e-93	-0.00605423	0.00528561	0.252044	1
NAGPA;N-acetylglucosamine-1-phosphodiester alpha-N-acetylglucosaminidase	NAGPA	Q9UK23	0.0800046	0.00690844	5.8733e-31	8.32246e-28	0.166235	0.00669454	5.93881e-135	8.4153e-132	4.6685e-05	0.00512617	0.992734	1
NAMPT;Nicotinamide phosphoribosyltransferase	NAMPT	P43490	-0.036375	0.00727915	5.84633e-07	0.000828425	0.0651481	0.00705377	2.6992e-20	3.82477e-17	-5.66086e-05	0.00540124	0.991638	1
NAP1L4;Nucleosome assembly protein 1-like 4	NAP1L4	Q99733	-0.00234631	0.00726967	0.746884	1	0.0965621	0.00704458	1.18158e-42	1.6743e-39	-0.00732766	0.0053942	0.174335	1
NAPRT;Nicotinate phosphoribosyltransferase	NAPRT	Q6XQN6	-0.0096502	0.00721222	0.180894	1	0.0453038	0.00698891	9.15595e-11	1.2974e-07	-0.0208974	0.00535158	9.44405e-05	0.133822
NARS1;Asparagine--tRNA ligase, cytoplasmic	NARS1	O43776	0.0404566	0.00726202	2.55151e-08	3.61549e-05	0.076059	0.00703716	3.47302e-27	4.92128e-24	-0.00750941	0.00538852	0.163449	1
NBL1;Neuroblastoma suppressor of tumorigenicity 1	NBL1	P41271	-0.0755298	0.00703307	7.329e-27	1.03852e-23	0.0776566	0.00681531	5.03068e-30	7.12848e-27	0.00586892	0.00521864	0.260764	1
NBN;Nibrin	NBN	O60934	-0.0601264	0.0071879	6.23226e-17	8.83111e-14	0.145175	0.00696534	6.76564e-96	9.58691e-93	0.00645991	0.00533353	0.225831	1
NCAM1;Neural cell adhesion molecule 1	NCAM1	P13591	0.103074	0.00679224	7.53206e-52	1.06729e-48	-0.0375025	0.00658194	1.22334e-08	1.73348e-05	0.0114188	0.00503994	0.0234782	1
NCAM2;Neural cell adhesion molecule 2	NCAM2	O15394	0.0632532	0.00697046	1.19996e-19	1.70035e-16	-0.0707326	0.00675463	1.27063e-25	1.80048e-22	0.00412005	0.00517218	0.425701	1
NCAN;Neurocan core protein	NCAN	O14594	0.122398	0.00640962	6.99036e-81	9.90534e-78	-0.0361739	0.00621116	5.79486e-09	8.21132e-06	-0.00418118	0.00475603	0.379335	1
NCF2;Neutrophil cytosol factor 2	NCF2	P19878	-0.0594186	0.00721112	1.7832e-16	2.5268e-13	0.110646	0.00698785	2.83017e-56	4.01035e-53	0.00450202	0.00535076	0.400141	1
NCK2;Cytoplasmic protein NCK2	NCK2	O43639	0.0098049	0.0072273	0.174901	1	0.150406	0.00700352	1.17671e-101	1.66739e-98	0.00613927	0.00536276	0.252301	1
NCLN;Nicalin	NCLN	Q969V3	-0.000276592	0.00731713	0.969847	1	-0.00212458	0.00709057	0.764457	1	-0.00445261	0.00542942	0.41217	1
NCR1;Natural cytotoxicity triggering receptor 1	NCR1	O76036	-0.0960776	0.00704766	3.28174e-42	4.65023e-39	0.0583702	0.00682944	1.31512e-17	1.86353e-14	0.0133486	0.00522947	0.0106972	1
NCR3LG1;Natural cytotoxicity triggering receptor 3 ligand 1	NCR3LG1	Q68D85	-0.110292	0.00685791	5.44608e-58	7.7171e-55	-0.0130426	0.00664557	0.0497005	1	0.00831314	0.00508867	0.10234	1
NCS1;Neuronal calcium sensor 1	NCS1	P62166	0.0146718	0.0064375	0.0226662	1	0.194908	0.00623817	2.0545e-211	2.91123e-208	0.0308815	0.00477672	1.02618e-10	1.45409e-07
NDRG1;Protein NDRG1	NDRG1	Q92597	-0.0107208	0.00731945	0.143011	1	0.0411867	0.00709282	6.42158e-09	9.09938e-06	-0.00602452	0.00543114	0.267328	1
NDST1;Bifunctional heparan sulfate N-deacetylase/N-sulfotransferase 1	NDST1	P52848	0.00502083	0.00732567	0.493112	1	0.00157911	0.00709885	0.823968	1	0.000999639	0.00543576	0.854092	1
NDUFA5;NADH dehydrogenase [ubiquinone] 1 alpha subcomplex subunit 5	NDUFA5	Q16718	-0.00349199	0.00725392	0.63024	1	0.102279	0.00702932	7.99576e-48	1.133e-44	0.000816146	0.00538252	0.87948	1
NDUFB7;NADH dehydrogenase [ubiquinone] 1 beta subcomplex subunit 7	NDUFB7	P17568	0.022709	0.007241	0.00171313	1	0.119594	0.0070168	7.06109e-65	1.00056e-61	0.0143538	0.00537293	0.00755453	1
NDUFS6;NADH dehydrogenase [ubiquinone] iron-sulfur protein 6, mitochondrial	NDUFS6	O75380	0.00605538	0.00725623	0.404001	1	0.0595126	0.00703156	2.69017e-17	3.81197e-14	-0.00791705	0.00538423	0.141459	1
NEB;Nebulin	NEB	P20929	-0.020569	0.00728584	0.0047582	1	0.00547221	0.00706025	0.438302	1	0.00115885	0.0054062	0.83027	1
NECAP2;Adaptin ear-binding coat-associated protein 2	NECAP2	Q9NVZ3	0.00395213	0.00725598	0.585982	1	0.126031	0.00703131	1.58523e-71	2.24627e-68	0.0023629	0.00538404	0.660757	1
NECTIN1;Nectin-1	NECTIN1	Q15223	-0.00322703	0.00731857	0.659261	1	0.0303012	0.00709197	1.937e-05	0.0274473	-0.00857859	0.00543049	0.114183	1
NECTIN2;Nectin-2	NECTIN2	Q92692	-0.10654	0.00701636	6.54444e-52	9.27347e-49	0.108123	0.00679911	9.59259e-57	1.35927e-53	0.0122797	0.00520624	0.0183472	1
NECTIN4;Nectin-4	NECTIN4	Q96NY8	-0.0416329	0.0071752	6.5958e-09	9.34624e-06	0.00408674	0.00695303	0.556695	1	0.0186072	0.0053241	0.000474823	0.672824
NEDD4L;E3 ubiquitin-protein ligase NEDD4-like	NEDD4L	Q96PU5	0.00844199	0.00725408	0.24453	1	0.107954	0.00702947	4.69911e-53	6.65864e-50	-0.018245	0.00538263	0.000700717	0.992916
NEDD9;Enhancer of filamentation 1	NEDD9	Q14511	-0.0156694	0.00729613	0.0317495	1	0.0593681	0.00707023	4.75234e-17	6.73406e-14	-0.00913459	0.00541384	0.0915611	1
NEFL;Neurofilament light polypeptide	NEFL	P07196	0.0135951	0.00629111	0.030702	1	0.0252088	0.00609632	3.55632e-05	0.0503931	0.00709826	0.00466809	0.128371	1
NEK7;Serine/threonine-protein kinase Nek7	NEK7	Q8TDX7	-0.00693433	0.00730312	0.342372	1	0.0831241	0.00707699	8.52045e-32	1.20735e-28	0.0026835	0.00541902	0.620462	1
NELL1;Protein kinase C-binding protein NELL1	NELL1	Q92832	0.0547876	0.00727898	5.32241e-14	7.54185e-11	0.000369965	0.0070536	0.95817	1	-0.00647666	0.00540111	0.230484	1
NELL2;Protein kinase C-binding protein NELL2	NELL2	Q99435	0.04275	0.00701187	1.0933e-09	1.5492e-06	0.0185796	0.00679476	0.00625265	1	-0.00827775	0.00520291	0.111622	1
NENF;Neudesin	NENF	Q9UMX5	-0.0197496	0.00730566	0.00686834	1	0.00629221	0.00707946	0.374118	1	-0.00417141	0.00542091	0.4416	1
NEO1;Neogenin	NEO1	Q92859	0.037805	0.00723228	1.73019e-07	0.000245167	0.00994117	0.00700835	0.156061	1	-0.0112109	0.00536646	0.0367083	1
NEXN;Nexilin	NEXN	Q0ZGT2	0.000999483	0.00726143	0.890524	1	0.128545	0.0070366	3.27173e-74	4.63604e-71	-0.00252731	0.00538809	0.639033	1
NFASC;Neurofascin	NFASC	O94856	-0.0869284	0.00660956	2.05508e-39	2.91205e-36	0.11617	0.00640491	3.46471e-73	4.90949e-70	-0.0196385	0.00490439	6.23353e-05	0.0883291
NFAT5;Nuclear factor of activated T-cells 5	NFAT5	O94916	0.0175168	0.007293	0.016317	1	0.0726838	0.00706719	8.95576e-25	1.26903e-21	0.000643957	0.00541152	0.905278	1
NFATC1;Nuclear factor of activated T-cells, cytoplasmic 1	NFATC1	O95644	0.0258606	0.00719314	0.000324608	0.45997	0.14017	0.00697042	1.94429e-89	2.75506e-86	-0.00384778	0.00533742	0.470972	1
NFATC3;Nuclear factor of activated T-cells, cytoplasmic 3	NFATC3	Q12968	-0.0288702	0.00718671	5.90239e-05	0.0836369	0.0836121	0.00696419	3.83454e-33	5.43355e-30	0.00048518	0.00533264	0.927507	1
NFE2;Transcription factor NF-E2 45 kDa subunit	NFE2	Q16621	0.00962789	0.00722715	0.182809	1	0.139996	0.00700338	2.08996e-88	2.96148e-85	0.00176758	0.00536266	0.741698	1
NFIC;Nuclear factor 1 C-type	NFIC	P08651	-0.00287769	0.0073172	0.694116	1	0.0526515	0.00709064	1.1489e-13	1.62799e-10	-0.00518002	0.00542947	0.340061	1
NFKB1;Nuclear factor NF-kappa-B p105 subunit	NFKB1	P19838	-0.0115927	0.00719111	0.106951	1	0.172363	0.00696845	6.30088e-134	8.92835e-131	0.0138967	0.00533591	0.00920808	1
NFKB2;Nuclear factor NF-kappa-B p100 subunit	NFKB2	Q00653	0.0132805	0.00732792	0.069946	1	0.00452747	0.00710103	0.523752	1	0.00129515	0.00543743	0.811734	1
NFKBIE;NF-kappa-B inhibitor epsilon	NFKBIE	O00221	-0.00911503	0.00717608	0.204023	1	0.160126	0.00695389	1.82245e-116	2.58241e-113	-0.00294973	0.00532476	0.579607	1
NFU1;NFU1 iron-sulfur cluster scaffold homolog, mitochondrial	NFU1	Q9UMS0	-0.000842262	0.00728195	0.907919	1	0.05723	0.00705648	5.21283e-16	7.38658e-13	0.00740552	0.00540332	0.170524	1
NFX1;Transcriptional repressor NF-X1	NFX1	Q12986	-0.00401223	0.00719765	0.577233	1	0.171186	0.00697479	6.50969e-132	9.22423e-129	0.0107397	0.00534076	0.0443437	1
NFYA;Nuclear transcription factor Y subunit alpha	NFYA	P23511	-0.0329965	0.00727958	5.84101e-06	0.00827671	0.0869993	0.00705418	7.09992e-35	1.00606e-31	0.0111629	0.00540155	0.0387776	1
NGF;Beta-nerve growth factor	NGF	P01138	0.0404668	0.00732218	3.28795e-08	4.65902e-05	-0.0117505	0.00709546	0.0977179	1	-0.0123467	0.00543316	0.0230638	1
NGFR;Tumor necrosis factor receptor superfamily member 16	NGFR	P08138	-0.0267869	0.0073141	0.000250261	0.35462	-0.000908951	0.00708764	0.897956	1	-0.000393912	0.00542717	0.94214	1
NGRN;Neugrin	NGRN	Q9NPE2	-0.0377716	0.00720598	1.60023e-07	0.000226753	0.111185	0.00698287	6.98619e-57	9.89943e-54	0.01155	0.00534695	0.0307714	1
NHLRC3;NHL repeat-containing protein 3	NHLRC3	Q5JS37	-0.0687963	0.00665072	4.8295e-25	6.8434e-22	0.175614	0.0064448	8.17563e-162	1.15849e-158	-0.00284923	0.00493494	0.5637	1
NID1;Nidogen-1	NID1	P14543	0.0155607	0.00706031	0.0275334	1	0.102903	0.0068417	5.73169e-51	8.12181e-48	0.00296405	0.00523886	0.571546	1
NID2;Nidogen-2	NID2	Q14112	-0.00506191	0.00721106	0.482706	1	0.109621	0.00698779	2.83108e-55	4.01165e-52	0.000482809	0.00535072	0.928103	1
NINJ1;Ninjurin-1	NINJ1	Q92982	0.0258689	0.00728059	0.000381165	0.540111	0.01326	0.00705516	0.0601874	1	-0.00419285	0.0054023	0.437681	1
NIT1;Deaminated glutathione amidase	NIT1	Q86X76	0.0164127	0.00720157	0.0226703	1	0.113595	0.00697859	2.34387e-59	3.32127e-56	-0.00831166	0.00534367	0.119855	1
NIT2;Omega-amidase NIT2	NIT2	Q9NQR4	0.0214749	0.00714077	0.00263709	1	0.139021	0.00691967	2.81661e-89	3.99113e-86	-0.00679835	0.00529855	0.19948	1
NLGN1;Neuroligin-1	NLGN1	Q8N2Q7	0.00496615	0.00732455	0.497767	1	-0.00302909	0.00709776	0.669552	1	-0.000653227	0.00543493	0.904333	1
NLGN2;Neuroligin-2	NLGN2	Q8NFZ4	-0.00100574	0.00732364	0.890772	1	-0.019197	0.00709688	0.00683379	1	-6.77904e-05	0.00543425	0.990047	1
NME1;Nucleoside diphosphate kinase A	NME1	P15531	-0.00745236	0.00731321	0.308197	1	-0.0192386	0.00708678	0.00663655	1	-0.00816621	0.00542651	0.132366	1
NME3;Nucleoside diphosphate kinase 3	NME3	Q13232	0.0524054	0.00725894	5.32618e-13	7.54719e-10	0.0161802	0.00703418	0.021441	1	0.0170489	0.00538624	0.00155068	1
NMI;N-myc-interactor	NMI	Q13287	-0.00706652	0.00728973	0.332362	1	0.0171236	0.00706402	0.0153534	1	-0.0140072	0.00540909	0.00961336	1
NMNAT1;Nicotinamide/nicotinic acid mononucleotide adenylyltransferase 1	NMNAT1	Q9HAN9	-0.0433685	0.00716039	1.40325e-09	1.98841e-06	0.10182	0.00693869	1.313e-48	1.86052e-45	0.00342225	0.00531312	0.519506	1
NMRK2;Nicotinamide riboside kinase 2	NMRK2	Q9NPI5	-0.00880509	0.00731645	0.228805	1	-0.0106632	0.00708991	0.132592	1	-0.00533283	0.00542892	0.325959	1
NMT1;Glycylpeptide N-tetradecanoyltransferase 1	NMT1	P30419	0.00853827	0.00730748	0.242642	1	0.0565491	0.00708122	1.43845e-15	2.03828e-12	-0.0118207	0.00542226	0.0292611	1
NOMO1;Nodal modulator 1	NOMO1	Q15155	-0.0222692	0.00673407	0.000944143	1	0.16443	0.00652556	7.19818e-139	1.01998e-135	0.00178136	0.00499678	0.721468	1
NOP56;Nucleolar protein 56	NOP56	O00567	-0.0104481	0.00732171	0.153589	1	0.0119755	0.00709501	0.0914445	1	0.006379	0.00543282	0.240338	1
NOS1;Nitric oxide synthase, brain	NOS1	P29475	-0.0413834	0.00684436	1.49643e-09	2.12044e-06	0.0236948	0.00663244	0.000353983	0.501594	0.00293787	0.00507861	0.562945	1
NOS2;Nitric oxide synthase, inducible	NOS2	P35228	0.00119754	0.00730656	0.869811	1	-0.00688707	0.00708033	0.330706	1	0.00216051	0.00542157	0.690263	1
NOS3;Nitric oxide synthase, endothelial	NOS3	P29474	-0.100352	0.00684003	1.36851e-48	1.93918e-45	0.242399	0.00662824	2.01915e-287	2.86114e-284	0.0142967	0.0050754	0.00485217	1
NOTCH1;Neurogenic locus notch homolog protein 1	NOTCH1	P46531	0.0359428	0.00714472	4.91141e-07	0.000695946	0.0345758	0.0069235	5.94294e-07	0.000842114	0.0147146	0.00530149	0.00551362	1
NOTCH2;Neurogenic locus notch homolog protein 2	NOTCH2	Q04721	0.0544214	0.00690068	3.20016e-15	4.53463e-12	-0.00159405	0.00668702	0.811588	1	0.0209722	0.00512041	4.2163e-05	0.0597449
NOTCH3;Neurogenic locus notch homolog protein 3	NOTCH3	Q9UM47	0.0208723	0.00663806	0.00166606	1	-0.183499	0.00643253	5.6253e-177	7.97106e-174	-0.00868602	0.00492554	0.0778307	1
NPC2;NPC intracellular cholesterol transporter 2	NPC2	P61916	-0.095281	0.00656793	1.49996e-47	2.12545e-44	0.148774	0.00636457	6.24818e-120	8.85367e-117	0.0126122	0.0048735	0.00965964	1
NPDC1;Neural proliferation differentiation and control protein 1	NPDC1	Q9NQX5	0.0157464	0.00682682	0.021086	1	0.105039	0.00661544	1.4193e-56	2.01115e-53	0.0265547	0.0050656	1.59616e-07	0.000226176
NPHS1;Nephrin	NPHS1	O60500	0.0753506	0.00726963	3.88294e-25	5.50213e-22	0.0280401	0.00704454	6.89384e-05	0.0976857	-0.0091793	0.00539417	0.0888192	1
NPHS2;Podocin	NPHS2	Q9NP85	0.0052863	0.00732764	0.470656	1	-0.00975082	0.00710076	0.169696	1	0.00854902	0.00543722	0.115887	1
NPL;N-acetylneuraminate lyase	NPL	Q9BXD5	0.00189873	0.00631467	0.763656	1	0.177339	0.00611915	1.59466e-182	2.25963e-179	-0.00247836	0.00468558	0.596855	1
NPPB;Natriuretic peptides B	NPPB	P16860	-0.0682722	0.00709708	7.01989e-22	9.94718e-19	-0.0316854	0.00687733	4.09518e-06	0.00580287	0.00726607	0.00526614	0.167666	1
NPPC;C-type natriuretic peptide	NPPC	P23582	-0.0250599	0.00625562	6.18887e-05	0.0876963	0.178397	0.00606193	4.42315e-188	6.26761e-185	-0.00157651	0.00464177	0.734134	1
NPR1;Atrial natriuretic peptide receptor 1	NPR1	P16066	0.000447304	0.007296	0.951114	1	-0.0255089	0.00707009	0.000308994	0.437845	-0.000249253	0.00541374	0.963278	1
NPTN;Neuroplastin	NPTN	Q9Y639	0.0188766	0.00730601	0.00977857	1	0.00113571	0.0070798	0.872554	1	-0.00278105	0.00542117	0.607956	1
NPTX1;Neuronal pentraxin-1	NPTX1	Q15818	0.0579217	0.00700089	1.34627e-16	1.90766e-13	0.014917	0.00678412	0.0278979	1	0.00726147	0.00519476	0.162169	1
NPTX2;Neuronal pentraxin-2	NPTX2	P47972	0.0167633	0.00620119	0.00687002	1	-0.0256765	0.00600918	1.93478e-05	0.0274158	0.00989978	0.00460138	0.0314449	1
NPTXR;Neuronal pentraxin receptor	NPTXR	O95502	0.0555546	0.00708918	4.76061e-15	6.74579e-12	0.00454494	0.00686968	0.508236	1	0.00729018	0.00526027	0.165788	1
NPY;Pro-neuropeptide Y	NPY	P01303	-0.00149317	0.00649207	0.818094	1	0.405082	0.00629106	0	0	0.0474674	0.00481721	7.07245e-23	1.00217e-19
NRCAM;Neuronal cell adhesion molecule	NRCAM	Q92823	0.00478404	0.00709229	0.499972	1	0.0332602	0.0068727	1.30735e-06	0.00185251	0.000291292	0.00526259	0.955859	1
NRGN;Neurogranin	NRGN	Q92686	0.0334071	0.00727951	4.46487e-06	0.00632671	0.0768825	0.00705412	1.29051e-27	1.82865e-24	-0.00201427	0.00540151	0.709218	1
NRN1;Neuritin	NRN1	Q9NPD7	-0.000498264	0.00732341	0.945756	1	-0.00869855	0.00709665	0.22031	1	-0.00737706	0.00543408	0.174613	1
NRP1;Neuropilin-1	NRP1	O14786	0.00301405	0.00701774	0.667569	1	-0.21683	0.00680045	5.86024e-220	8.30397e-217	-0.00490369	0.00520727	0.346352	1
NRP2;Neuropilin-2	NRP2	O60462	0.047226	0.00701875	1.73985e-11	2.46537e-08	-0.0402496	0.00680143	3.2925e-09	4.66547e-06	0.00692644	0.00520801	0.183541	1
NRTN;Neurturin	NRTN	Q99748	-0.0099738	0.00731261	0.172602	1	0.033021	0.00708619	3.17497e-06	0.00449894	0.000439178	0.00542607	0.935491	1
NRXN3;Neurexin-3	NRXN3	Q9Y4C0	0.010093	0.0073223	0.168091	1	0.0063015	0.00709559	0.3745	1	-0.0116232	0.00543326	0.0324204	1
NSFL1C;NSFL1 cofactor p47	NSFL1C	Q9UNZ2	-0.0011518	0.00713797	0.871809	1	0.15178	0.00691696	5.16802e-106	7.32308e-103	-0.000533757	0.00529648	0.919729	1
NT5C;5'(3')-deoxyribonucleotidase, cytosolic type	NT5C	Q8TCD5	0.0218308	0.00725862	0.00263529	1	0.105551	0.00703387	9.61279e-51	1.36213e-47	-0.000520036	0.005386	0.923082	1
NT5C1A;Cytosolic 5'-nucleotidase 1A	NT5C1A	Q9BXI3	-0.00241921	0.00653762	0.711352	1	0.130477	0.0063352	1.07364e-93	1.52134e-90	0.00396814	0.00485101	0.413361	1
NT5C3A;Cytosolic 5'-nucleotidase 3A	NT5C3A	Q9H0P0	0.0638517	0.00727933	1.83816e-18	2.60467e-15	0.0529365	0.00705395	6.31027e-14	8.94165e-11	-0.00605571	0.00540137	0.262235	1
NT5E;5'-nucleotidase	NT5E	P21589	0.0523184	0.00704443	1.13667e-13	1.61065e-10	0.145211	0.00682632	8.70736e-100	1.23383e-96	-0.0179414	0.00522707	0.000598947	0.848708
NTF3;Neurotrophin-3	NTF3	P20783	0.0383293	0.00720087	1.02764e-07	0.000145617	0.0212454	0.00697792	0.00233113	1	0.0184589	0.00534316	0.000551607	0.781628
NTF4;Neurotrophin-4	NTF4	P34130	0.00644058	0.00731122	0.378369	1	0.0278476	0.00708485	8.49007e-05	0.120304	0.00455566	0.00542503	0.401055	1
NTproBNP;N-terminal prohormone of brain natriuretic peptide	NTproBNP	NA	-0.0872934	0.00665826	3.53952e-39	5.0155e-36	-0.072569	0.0064521	2.67772e-29	3.79433e-26	0.00258948	0.00494053	0.600191	1
NTRK2;BDNF/NT-3 growth factors receptor	NTRK2	Q16620	0.105741	0.00697868	1.07007e-51	1.51629e-48	0.00904209	0.0067626	0.181207	1	-0.00940109	0.00517828	0.0694581	1
NTRK3;NT-3 growth factor receptor	NTRK3	Q16288	0.14704	0.00661559	1.06905e-108	1.51485e-105	-0.11258	0.00641075	9.60038e-69	1.36037e-65	-0.00535336	0.00490886	0.275478	1
NUB1;NEDD8 ultimate buster 1	NUB1	Q9Y5A7	0.00170764	0.00726645	0.814207	1	0.113918	0.00704146	1.17078e-58	1.659e-55	-0.00556123	0.00539181	0.30235	1
NUBP1;Cytosolic Fe-S cluster assembly factor NUBP1	NUBP1	P53384	-0.0162008	0.00730989	0.0266787	1	0.0027098	0.00708356	0.702058	1	-0.00662585	0.00542405	0.221879	1
NUCB2;Nucleobindin-2	NUCB2	P80303	-0.024648	0.00707754	0.00049724	0.70459	0.17474	0.0068584	6.6302e-142	9.395e-139	0.00303348	0.00525164	0.563521	1
NUDC;Nuclear migration protein nudC	NUDC	Q9Y266	0.0328713	0.00725555	5.90377e-06	0.00836564	0.092773	0.0070309	1.16385e-39	1.64917e-36	-0.00798159	0.00538373	0.138206	1
NUDT10;Diphosphoinositol polyphosphate phosphohydrolase 3-alpha	NUDT10	Q8NFP7	-0.0165246	0.00732493	0.0240809	1	-0.00817097	0.00709813	0.249681	1	-0.0047647	0.00543521	0.380691	1
NUDT15;Nucleotide triphosphate diphosphatase NUDT15	NUDT15	Q9NV35	0.00713933	0.00731883	0.329332	1	0.0257604	0.00709222	0.000281406	0.398752	0.000362754	0.00543068	0.946743	1
NUDT16;U8 snoRNA-decapping enzyme	NUDT16	Q96DE0	0.0229842	0.0072133	0.00144195	1	0.130115	0.00698995	5.73772e-77	8.13035e-74	0.0216354	0.00535237	5.30647e-05	0.0751927
NUDT2;Bis(5'-nucleosyl)-tetraphosphatase [asymmetrical]	NUDT2	P50583	0.0527114	0.00729584	5.11794e-13	7.25212e-10	0.0243202	0.00706994	0.000582504	0.825409	-0.0150628	0.00541362	0.00539881	1
NUDT5;ADP-sugar pyrophosphatase	NUDT5	Q9UKK9	-0.00107862	0.00717194	0.880454	1	0.140421	0.00694988	2.88962e-90	4.0946e-87	4.09744e-05	0.00532169	0.993857	1
NUMB;Protein numb homolog	NUMB	P49757	0.00785496	0.00711915	0.26988	1	0.203814	0.00689872	1.62735e-189	2.30596e-186	0.00918829	0.00528252	0.0819772	1
NUP50;Nuclear pore complex protein Nup50	NUP50	Q9UKX7	-0.00267794	0.00732661	0.714734	1	-0.0120255	0.00709976	0.090314	1	0.00785491	0.00543646	0.148506	1
NXPE4;NXPE family member 4	NXPE4	Q6UWF7	-0.00894732	0.00732812	0.22211	1	0.0101537	0.00710122	0.152767	1	0.00109243	0.00543757	0.840775	1
NXPH1;Neurexophilin-1	NXPH1	P58417	0.0564313	0.00724601	6.9982e-15	9.91644e-12	0.007124	0.00702165	0.310315	1	-0.000112322	0.00537665	0.983333	1
NXPH3;Neurexophilin-3	NXPH3	O95157	0.0842842	0.00700366	2.72609e-33	3.86287e-30	0.00175804	0.0067868	0.795608	1	-0.00178992	0.00519682	0.730528	1
OBP2B;Odorant-binding protein 2b	OBP2B	Q9NPH6	-0.00684614	0.00598583	0.252746	1	-0.0152093	0.0058005	0.00874332	1	0.00474943	0.00444158	0.284936	1
OCLN;Occludin	OCLN	Q16625	-0.062305	0.00674558	2.68669e-20	3.80704e-17	0.148324	0.00653672	3.56837e-113	5.05637e-110	-0.000663847	0.00500532	0.894488	1
ODAM;Odontogenic ameloblast-associated protein	ODAM	A1E959	0.0243778	0.00721477	0.000728627	1	0.0216145	0.00699138	0.00199246	1	-0.00337521	0.00535347	0.52839	1
OFD1;Oral-facial-digital syndrome 1 protein	OFD1	O75665	-0.000989577	0.00732567	0.892547	1	0.00189218	0.00709885	0.789819	1	0.00115599	0.00543576	0.831591	1
OGA;Protein O-GlcNAcase	OGA	O60502	0.0101655	0.00724635	0.160674	1	0.123373	0.00702198	8.29692e-69	1.17567e-65	0.00049805	0.0053769	0.9262	1
OGFR;Opioid growth factor receptor	OGFR	Q9NZT2	-0.0130659	0.00707689	0.0648593	1	0.131241	0.00685777	3.17207e-81	4.49482e-78	-0.0041763	0.00525115	0.426438	1
OGN;Mimecan	OGN	P20774	-0.0358023	0.00658287	5.40272e-08	7.65565e-05	0.0345419	0.00637905	6.1723e-08	8.74614e-05	0.00819735	0.00488459	0.0933154	1
OGT;UDP-N-acetylglucosamine--peptide N-acetylglucosaminyltransferase 110 kDa subunit	OGT	O15294	-0.00732932	0.00731961	0.316675	1	-0.00297918	0.00709297	0.674474	1	-0.00831307	0.00543126	0.125878	1
OLFM4;Olfactomedin-4	OLFM4	Q6UX06	-0.0401383	0.00721256	2.6398e-08	3.7406e-05	0.0730721	0.00698924	1.51599e-25	2.14816e-22	0.0109982	0.00535183	0.0398821	1
OLR1;Oxidized low-density lipoprotein receptor 1	OLR1	P78380	-0.0395092	0.00720792	4.24951e-08	6.02155e-05	0.0720827	0.00698474	6.20846e-25	8.79739e-22	0.0102901	0.00534838	0.0543667	1
OMD;Osteomodulin	OMD	Q99983	0.0711378	0.00685255	3.28246e-25	4.65124e-22	-0.0696279	0.00664038	1.09838e-25	1.55641e-22	-0.00261649	0.00508469	0.606849	1
OMG;Oligodendrocyte-myelin glycoprotein	OMG	P23515	0.0794231	0.0071393	1.06109e-28	1.50356e-25	-0.0329419	0.00691825	1.92827e-06	0.00273236	-0.00499681	0.00529747	0.345562	1
OMP;Olfactory marker protein	OMP	P47874	0.00137168	0.00732793	0.851517	1	0.0158525	0.00710104	0.0255936	1	-0.003325	0.00543743	0.540872	1
OPHN1;Oligophrenin-1	OPHN1	O60890	0.016003	0.00724971	0.0272928	1	0.131323	0.00702524	1.33877e-77	1.89704e-74	0.00758094	0.0053794	0.158769	1
OPLAH;5-oxoprolinase	OPLAH	O14841	0.00112146	0.00727008	0.877408	1	0.0795462	0.00704497	1.63011e-29	2.30986e-26	-0.000812675	0.0053945	0.880254	1
OPTC;Opticin	OPTC	Q9UBM4	0.047817	0.00684335	2.85075e-12	4.03952e-09	-0.0268317	0.00663146	5.2183e-05	0.0739433	0.00831292	0.00507787	0.101621	1
ORM1;Alpha-1-acid glycoprotein 1	ORM1	P02763	-0.00414994	0.00693043	0.549311	1	0.121409	0.00671585	1.01313e-72	1.4356e-69	0.0402066	0.00514248	5.49324e-15	7.78393e-12
OSBPL2;Oxysterol-binding protein-related protein 2	OSBPL2	Q9H1P3	0.0154895	0.00731648	0.0342612	1	0.0024675	0.00708994	0.727821	1	0.00219852	0.00542894	0.685507	1
OSCAR;Osteoclast-associated immunoglobulin-like receptor	OSCAR	Q8IYS5	-0.0935635	0.00716567	7.11778e-39	1.00859e-35	0.0586755	0.0069438	3.0216e-17	4.28161e-14	0.0157435	0.00531703	0.00306883	1
OSM;Oncostatin-M	OSM	P13725	-0.0885679	0.00697248	6.90058e-37	9.77813e-34	0.112837	0.00675659	2.26735e-62	3.21283e-59	0.0125617	0.00517368	0.0151876	1
OSMR;Oncostatin-M-specific receptor subunit beta	OSMR	Q99650	0.0326262	0.00700503	3.21189e-06	0.00455125	-0.0253932	0.00678814	0.000183708	0.260314	0.0157501	0.00519784	0.00244625	1
OSTN;Osteocrin	OSTN	P61366	-0.0119863	0.00731505	0.10131	1	0.0174208	0.00708855	0.0139921	1	-0.0014942	0.00542787	0.7831	1
OTOA;Otoancorin	OTOA	Q7RTW8	-0.00532026	0.00732902	0.467895	1	0.00115641	0.0071021	0.870656	1	-0.00320946	0.00543824	0.555084	1
OTUD6B;Deubiquitinase OTUD6B	OTUD6B	Q8N6M0	0.0232689	0.00726683	0.00136566	1	0.10051	0.00704183	4.31661e-46	6.11664e-43	-0.00197857	0.0053921	0.713667	1
OTUD7B;OTU domain-containing protein 7B	OTUD7B	Q6GQQ9	0.0266387	0.00719002	0.000211749	0.300048	0.143784	0.00696739	4.62653e-94	6.55579e-91	0.0068805	0.0053351	0.197175	1
OXCT1;Succinyl-CoA:3-ketoacid coenzyme A transferase 1, mitochondrial	OXCT1	P55809	0.00349714	0.00728587	0.631238	1	0.0558953	0.00706028	2.50675e-15	3.55206e-12	0.0167174	0.00540623	0.00198801	1
OXT;Oxytocin-neurophysin 1	OXT	P01178	-0.108981	0.00663635	2.24065e-60	3.175e-57	0.171929	0.00643087	6.67115e-156	9.45302e-153	-0.0199386	0.00492427	5.15373e-05	0.0730284
P4HB;Protein disulfide-isomerase	P4HB	P07237	0.0994097	0.00691936	1.13134e-46	1.60311e-43	0.17307	0.00670512	1.48622e-145	2.10598e-142	-0.00617798	0.00513427	0.228874	1
PACS2;Phosphofurin acidic cluster sorting protein 2	PACS2	Q86VP3	0.00377319	0.00723547	0.602032	1	0.143472	0.00701144	1.60453e-92	2.27361e-89	0.00489064	0.00536883	0.362337	1
PADI2;Protein-arginine deiminase type-2	PADI2	Q9Y2J8	-0.0270639	0.00730038	0.000209889	0.297413	0.0296067	0.00707434	2.8575e-05	0.0404908	0.00363155	0.00541699	0.502607	1
PADI4;Protein-arginine deiminase type-4	PADI4	Q9UM07	-0.0336329	0.00725703	3.59022e-06	0.00508735	0.0678828	0.00703233	5.0852e-22	7.20573e-19	0.0668371	0.00538482	2.66245e-35	3.77269e-32
PAEP;Glycodelin	PAEP	P09466	-0.101818	0.00673172	1.60465e-51	2.27379e-48	-0.0304438	0.00652328	3.06824e-06	0.0043477	-0.00358454	0.00499503	0.472996	1
PAFAH1B3;Platelet-activating factor acetylhydrolase IB subunit alpha1	PAFAH1B3	Q15102	-0.0155666	0.00729209	0.03279	1	-0.000157821	0.00706631	0.982181	1	-0.004022	0.00541084	0.457292	1
PAFAH2;Platelet-activating factor acetylhydrolase 2, cytoplasmic	PAFAH2	Q99487	0.0173987	0.00726758	0.0166701	1	0.116	0.00704256	9.94646e-61	1.40941e-57	-0.00511952	0.00539265	0.342448	1
PAG1;Phosphoprotein associated with glycosphingolipid-enriched microdomains 1	PAG1	Q9NWQ8	-0.0709507	0.00694977	1.9531e-24	2.76754e-21	0.213981	0.00673459	1.84338e-218	2.61207e-215	-0.0177891	0.00515684	0.000562053	0.796429
PAGR1;PAXIP1-associated glutamate-rich protein 1	PAGR1	Q9BTK6	-0.0138086	0.00725795	0.0571077	1	0.118465	0.00703323	2.07252e-63	2.93676e-60	-0.00529778	0.00538551	0.325264	1
PAIP2B;Polyadenylate-binding protein-interacting protein 2B	PAIP2B	Q9ULR5	-0.00506683	0.00732006	0.488826	1	-0.0204208	0.00709341	0.00399375	1	-0.0055864	0.00543159	0.303721	1
PAK4;Serine/threonine-protein kinase PAK 4	PAK4	O96013	-0.00385465	0.00721456	0.593146	1	0.160269	0.00699117	1.85586e-115	2.62975e-112	0.00763348	0.00535331	0.153895	1
PALLD;Palladin	PALLD	Q8WX93	0.0173868	0.00732699	0.0176507	1	-0.0103763	0.00710012	0.143908	1	-0.00801063	0.00543673	0.140645	1
PALM;Paralemmin-1	PALM	O75781	0.0620123	0.00655742	3.36355e-21	4.76616e-18	0.0445031	0.00635438	2.54066e-12	3.60011e-09	0.0048522	0.0048657	0.318662	1
PALM2;Paralemmin-2	PALM2	Q8IXS6	-0.0124928	0.00639177	0.0506488	1	0.11731	0.00619386	1.33499e-79	1.89168e-76	-0.0148236	0.00474279	0.00177644	1
PALM3;Paralemmin-3	PALM3	A6NDB9	-0.0120635	0.00730656	0.098738	1	0.00535256	0.00708032	0.449668	1	-0.00350198	0.00542157	0.518327	1
PAM;Peptidyl-glycine alpha-amidating monooxygenase	PAM	P19021	0.00620647	0.00714762	0.385221	1	0.108144	0.00692631	8.98485e-55	1.27315e-51	0.0183175	0.00530364	0.000553466	0.784262
PAMR1;Inactive serine protease PAMR1	PAMR1	Q6UXH9	0.120838	0.00641742	1.05213e-78	1.49087e-75	0.168406	0.00621872	7.25923e-160	1.02863e-156	0.0462382	0.00476182	2.90943e-22	4.12266e-19
PAPPA;Pappalysin-1	PAPPA	Q13219	-0.0140767	0.00697113	0.0434658	1	0.0123389	0.00675529	0.0677743	1	-0.0124998	0.00517268	0.0156755	1
PARD3;Partitioning defective 3 homolog	PARD3	Q8TEW0	0.00581988	0.00730422	0.425582	1	0.0752981	0.00707806	2.16927e-26	3.07385e-23	0.000287047	0.00541984	0.957762	1
PARK7;Parkinson disease protein 7	PARK7	Q99497	0.00864562	0.00721128	0.230574	1	0.109428	0.00698799	4.39368e-55	6.22584e-52	-0.00163978	0.00535087	0.759264	1
PARP1;Poly [ADP-ribose] polymerase 1	PARP1	P09874	-0.0448984	0.00707698	2.26163e-10	3.20474e-07	0.187255	0.00685786	1.81673e-162	2.57431e-159	0.00754044	0.00525123	0.151028	1
PAXX;Protein PAXX	PAXX	Q9BUH6	-0.0346457	0.00705649	9.15975e-07	0.00129794	0.209933	0.006838	2.74048e-204	3.88327e-201	0.018157	0.00523602	0.000525535	0.744684
PBK;Lymphokine-activated killer T-cell-originated protein kinase	PBK	Q96KB5	-0.0127821	0.00731521	0.0805878	1	-0.037222	0.00708871	1.52253e-07	0.000215743	0.00125483	0.005428	0.817178	1
PBLD;Phenazine biosynthesis-like domain-containing protein	PBLD	P30039	0.0110277	0.00703031	0.116751	1	0.136516	0.00681263	7.93724e-89	1.12471e-85	-0.0202797	0.0052166	0.000101453	0.143758
PBXIP1;Pre-B-cell leukemia transcription factor-interacting protein 1	PBXIP1	Q96AQ6	0.0259274	0.00701107	0.000217581	0.308312	0.166421	0.00679399	2.08263e-131	2.95109e-128	0.00229582	0.00520232	0.658994	1
PCARE;Photoreceptor cilium actin regulator	PCARE	A6NGG8	0.000470032	0.0073241	0.94883	1	-0.00929085	0.00709733	0.190522	1	-0.000894262	0.00543459	0.869299	1
PCBD1;Pterin-4-alpha-carbinolamine dehydratase	PCBD1	P61457	-0.00397497	0.00657594	0.545534	1	0.180363	0.00637233	2.75459e-174	3.90326e-171	-0.0261735	0.00487944	8.18946e-08	0.000116045
PCBP2;Poly(rC)-binding protein 2	PCBP2	Q15366	0.0191761	0.00719338	0.00768422	1	0.159878	0.00697065	1.43475e-115	2.03304e-112	0.0029392	0.00533759	0.58187	1
PCDH1;Protocadherin-1	PCDH1	Q08174	0.021727	0.00712668	0.00230016	1	0.0185887	0.00690602	0.00711287	1	-0.00792865	0.0052881	0.133795	1
PCDH12;Protocadherin-12	PCDH12	Q9NPG4	-0.0231089	0.00730811	0.00156778	1	0.0386855	0.00708183	4.72266e-08	6.692e-05	-0.0120728	0.00542273	0.025998	1
PCDH17;Protocadherin-17	PCDH17	O14917	-0.0931121	0.00714023	8.85309e-39	1.25448e-35	0.0467226	0.00691915	1.47413e-11	2.08884e-08	0.000104937	0.00529816	0.984198	1
PCDH7;Protocadherin-7	PCDH7	O60245	0.00719196	0.00720189	0.317985	1	0.0840416	0.0069789	2.47758e-33	3.51073e-30	0.00620964	0.00534391	0.245242	1
PCDH9;Protocadherin-9	PCDH9	Q9HC56	-0.0218432	0.00701775	0.00185617	1	0.114928	0.00680047	8.02521e-64	1.13717e-60	-0.000748063	0.00520728	0.885772	1
PCDHB15;Protocadherin beta-15	PCDHB15	Q9Y5E8	-0.0687902	0.0072707	3.22331e-21	4.56743e-18	-0.00480425	0.00704558	0.495318	1	-0.000767795	0.00539497	0.88683	1
PCNA;Proliferating cell nuclear antigen	PCNA	P12004	-0.000552383	0.00732365	0.939877	1	-6.02975e-05	0.00709689	0.993221	1	0.0010398	0.00543426	0.848258	1
PCSK7;Proprotein convertase subtilisin/kexin type 7	PCSK7	Q16549	-0.000141962	0.00727147	0.984424	1	0.0383014	0.00704632	5.49572e-08	7.78744e-05	-0.00281634	0.00539554	0.60169	1
PCSK9;Proprotein convertase subtilisin/kexin type 9	PCSK9	Q8NBP7	0.197847	0.006595	2.85448e-195	4.0448e-192	0.07385	0.0063908	7.855e-31	1.11305e-27	0.0261655	0.00489359	9.00372e-08	0.000127583
PCYT2;Ethanolamine-phosphate cytidylyltransferase	PCYT2	Q99447	0.00390405	0.00725188	0.590339	1	0.0995492	0.00702734	1.98288e-45	2.80974e-42	0.00595201	0.005381	0.268684	1
PDAP1;28 kDa heat- and acid-stable phosphoprotein	PDAP1	Q13442	0.0141856	0.00726808	0.0509743	1	0.0993855	0.00704304	4.30221e-45	6.09623e-42	0.0031834	0.00539303	0.555006	1
PDCD1;Programmed cell death protein 1	PDCD1	Q15116	-0.0350735	0.00718829	1.06949e-06	0.00151547	0.0554593	0.00696572	1.74688e-15	2.47533e-12	-0.00594413	0.00533382	0.265106	1
PDCD1LG2;Programmed cell death 1 ligand 2	PDCD1LG2	Q9BQ51	-0.0592616	0.00725097	3.10977e-16	4.40655e-13	0.0463921	0.00702646	4.10051e-11	5.81043e-08	0.0024266	0.00538033	0.651983	1
PDCD5;Programmed cell death protein 5	PDCD5	O14737	0.000357947	0.00710406	0.959815	1	0.165574	0.0068841	8.44103e-127	1.19609e-123	0.00877786	0.00527132	0.0958793	1
PDCD6;Programmed cell death protein 6	PDCD6	O75340	0.033849	0.00730707	3.62801e-06	0.0051409	-0.0480559	0.00708083	1.16486e-11	1.65061e-08	-0.0139836	0.00542196	0.00991078	1
PDCL2;Phosducin-like protein 2	PDCL2	Q8N4E4	-0.00826497	0.0073278	0.259373	1	0.0178048	0.00710091	0.0121668	1	0.00198812	0.00543734	0.714635	1
PDE1C;Calcium/calmodulin-dependent 3',5'-cyclic nucleotide phosphodiesterase 1C	PDE1C	Q14123	0.000946139	0.00732568	0.897237	1	-0.0171841	0.00709886	0.0154965	1	-0.00249186	0.00543576	0.646654	1
PDE4D;cAMP-specific 3',5'-cyclic phosphodiesterase 4D	PDE4D	Q08499	-0.00688511	0.00732368	0.347164	1	-0.00268313	0.00709692	0.705381	1	-0.00331252	0.00543428	0.542158	1
[truncated: 921 more rows]

## Sheet: S4
Supplementary Table 4. Sensitivity analyses refitting models for lipoprotein-protein associations in UK Biobank using other available methods to measure lipoprotein concentration.
Estimates are beta coefficients reflecting the change in protein concentration (standard deviation units) per one standard deviation increase in LDL, TRL, or Lp(a) concentration. Sensitivity analyses refit main models (Table S3) with the following modifications: 1) replacement of conventional LDL and TRL measurements with NMR-derived LDL and TRL particle counts; and 2) replacement of conventional…
			Sensitivity analysis - Direct measurement of LDL and TRL particle count using nuclear magnetic resonance												Sensitivity analysis - Lipoprotein(a) measurement using Olink Expliore platform
Protein - long name	Protein - short name	UniProt ID	Estimate LDL	SE LDL	P LDL	Padj LDL	Estimate TRL	SE TRL	P TRL	Padj TRL	Estimate Lp(a)	SE Lp(a)	P Lp(a)	Padj Lp(a)	Estimate LDL	SE LDL	P LDL	Padj LDL	Estimate TRL	SE TRL	P TRL	Padj TRL	Estimate Lp(a)	SE Lp(a)	P Lp(a)	Padj Lp(a)
A1BG;Alpha-1B-glycoprotein	A1BG	P04217	-0.0787196	0.0132202	2.65354e-09	3.76007e-06	0.194394	0.0131263	2.36591e-49	3.3525e-46	0.032979	0.00674476	1.01859e-06	0.00144334	0.0444092	0.00669863	3.41455e-11	4.83842e-08	0.0990585	0.00653386	9.36538e-52	1.32707e-48	0.0525984	0.00497626	4.49774e-26	6.3733e-23
AAMDC;Mth938 domain-containing protein	AAMDC	Q9H7C9	-0.0874773	0.0140295	4.60375e-10	6.52352e-07	0.24014	0.0139298	4.19054e-66	5.93799e-63	0.0144996	0.00715765	0.0428046	1	0.0347131	0.00712216	1.09857e-06	0.00155667	0.151275	0.00694698	1.93009e-104	2.73494e-101	0.0170335	0.00529089	0.00128576	1
AARSD1;Alanyl-tRNA editing protein Aarsd1	AARSD1	Q9BTE6	-0.1059	0.0140539	5.08672e-14	7.20788e-11	0.125319	0.0139541	2.92838e-19	4.14951e-16	0.0125578	0.0071701	0.0798914	1	-0.0196709	0.00712788	0.00578816	1	0.0924701	0.00695255	2.88838e-40	4.09283e-37	0.00959136	0.00529514	0.0700951	1
ABCA2;ATP-binding cassette sub-family A member 2	ABCA2	Q9BZC7	-0.137357	0.0140552	1.66157e-22	2.35445e-19	0.195475	0.0139553	2.31767e-44	3.28414e-41	0.0123095	0.00717076	0.0860644	1	-0.0272457	0.00714305	0.000136802	0.193848	0.105014	0.00696735	3.56162e-51	5.04681e-48	0.00316634	0.00530641	0.550711	1
ABHD14B;Protein ABHD14B	ABHD14B	Q96IU4	-0.0440561	0.0141556	0.00185925	1	0.129659	0.0140551	3.11789e-20	4.41804e-17	0.000151423	0.00722202	0.983272	1	0.0313314	0.00718576	1.30309e-05	0.0184647	0.0875673	0.00700901	9.64143e-36	1.36619e-32	-0.00936151	0.00533814	0.0794901	1
ABL1;Tyrosine-protein kinase ABL1	ABL1	P00519	-0.129059	0.0139299	2.15167e-20	3.04891e-17	0.287699	0.0138309	4.61144e-95	6.53441e-92	0.0240528	0.00710684	0.000714599	1	-0.00575658	0.00708798	0.416705	1	0.185573	0.00691364	4.04005e-157	5.72475e-154	0.0271735	0.0052655	2.47397e-07	0.000350561
ABO;Histo-blood group ABO system transferase	ABO	P16442	0.0570398	0.0143127	6.76549e-05	0.095867	-0.0244549	0.0142111	0.0852961	1	-0.010444	0.00730216	0.152656	1	0.0559723	0.00726465	1.34519e-14	1.90613e-11	-0.0248531	0.00708596	0.000453124	0.642077	-0.0132078	0.00539675	0.0143956	1
ABRAXAS2;BRISC complex subunit Abraxas 2	ABRAXAS2	Q15018	-0.0942037	0.0141482	2.84308e-11	4.02864e-08	0.183265	0.0140477	9.76267e-39	1.38337e-35	0.0186416	0.00721821	0.00981384	1	-0.00705894	0.00717795	0.325408	1	0.125895	0.00700139	5.71837e-72	8.10293e-69	0.0143849	0.00533234	0.00698578	1
ACAA1;3-ketoacyl-CoA thiolase, peroxisomal	ACAA1	P09110	-0.170911	0.0136859	1.18909e-35	1.68494e-32	0.301134	0.0135887	1.77626e-107	2.51696e-104	0.00049268	0.00698237	0.943748	1	-0.00851187	0.00698352	0.222909	1	0.164131	0.00681174	3.00153e-127	4.25317e-124	-0.00939436	0.0051879	0.0701769	1
ACADM;Medium-chain specific acyl-CoA dehydrogenase, mitochondrial	ACADM	P11310	-0.0335629	0.0143107	0.0190215	1	0.0509817	0.014209	0.000334078	0.473388	-0.00669786	0.00730113	0.358958	1	-0.00390762	0.00726936	0.590894	1	0.0187624	0.00709055	0.00814583	1	-0.00339689	0.00540024	0.529337	1
ACADSB;Short/branched chain specific acyl-CoA dehydrogenase, mitochondrial	ACADSB	P45954	-0.045597	0.0141717	0.0012954	1	0.162017	0.014071	1.40728e-30	1.99412e-27	0.0182785	0.00723022	0.0114772	1	0.0276213	0.00718963	0.00012234	0.173355	0.117188	0.00701279	1.90769e-62	2.70319e-59	0.0240177	0.00534102	6.91877e-06	0.0098039
ACAN;Aggrecan core protein	ACAN	P16112	0.143684	0.0129589	1.75311e-28	2.48416e-25	-0.0442417	0.0128668	0.000586315	0.830808	0.0175648	0.00661144	0.00789682	1	0.129926	0.00656305	9.44497e-87	1.33835e-83	-0.016457	0.00640162	0.0101518	1	0.0235085	0.00487554	1.42925e-06	0.00202524
ACE;Angiotensin-converting enzyme	ACE	P12821	-0.0102622	0.0142243	0.470638	1	-0.00623625	0.0141233	0.658815	1	-0.00475322	0.00725708	0.51249	1	-0.0210708	0.00722555	0.00354603	1	0.00553927	0.00704782	0.431899	1	0.0137855	0.0053677	0.010226	1
ACE2;Angiotensin-converting enzyme 2	ACE2	Q9BYF1	-0.263028	0.0122937	2.13857e-100	3.03036e-97	0.36734	0.0122064	1.69419e-194	2.40067e-191	-0.000904738	0.00627211	0.885306	1	-0.0324142	0.00630852	2.78922e-07	0.000395232	0.158795	0.00615335	1.70097e-145	2.41028e-142	-0.0382416	0.00468646	3.4602e-16	4.9031e-13
ACHE;Acetylcholinesterase	ACHE	P22303	-0.0812015	0.0135509	2.10526e-09	2.98315e-06	0.0796187	0.0134547	3.32274e-09	4.70832e-06	-0.0257882	0.00691351	0.00019193	0.271965	-0.0322475	0.00689718	2.94376e-06	0.0041713	0.0530058	0.00672753	3.396e-15	4.81214e-12	-0.0132101	0.00512377	0.00993566	1
ACOT13;Acyl-coenzyme A thioesterase 13	ACOT13	Q9NPJ3	-0.034639	0.0142345	0.0149642	1	0.102884	0.0141334	3.47842e-13	4.92891e-10	0.0103865	0.00726224	0.152674	1	-0.00280088	0.00723308	0.698587	1	0.0730523	0.00705517	4.34072e-25	6.1508e-22	0.0138094	0.0053733	0.0101738	1
ACOX1;Peroxisomal acyl-coenzyme A oxidase 1	ACOX1	Q15067	-0.0348555	0.0142475	0.0144368	1	0.0990653	0.0141463	2.58912e-12	3.66878e-09	-0.00555135	0.00726889	0.445047	1	0.00849302	0.00722994	0.240123	1	0.0771974	0.00705211	7.64038e-28	1.08264e-24	0.00662909	0.00537097	0.21712	1
ACP1;Low molecular weight phosphotyrosine protein phosphatase	ACP1	P24666	-0.0461982	0.0142256	0.00116611	1	0.0637853	0.0141246	6.34212e-06	0.00898678	-0.0077029	0.00725774	0.288551	1	0.0141052	0.00721111	0.0504681	1	0.0532413	0.00703374	3.84031e-14	5.44172e-11	-0.0109262	0.00535697	0.0413961	1
ACP5;Tartrate-resistant acid phosphatase type 5	ACP5	P13686	-0.0115076	0.0133941	0.390264	1	0.166845	0.013299	5.7911e-36	8.20598e-33	0.00716735	0.0068335	0.294258	1	0.0759042	0.00679459	6.30416e-29	8.933e-26	0.10714	0.00662746	1.42216e-58	2.0152e-55	-0.00207101	0.00504755	0.681589	1
ACP6;Lysophosphatidic acid phosphatase type 6	ACP6	Q9NPH0	-0.0216319	0.0141942	0.127525	1	0.086286	0.0140933	9.39096e-10	1.3307e-06	0.00249652	0.00724167	0.73029	1	0.0244121	0.00721391	0.000715082	1	0.0493378	0.00703646	2.39609e-12	3.39526e-09	0.00459632	0.00535905	0.391079	1
ACRBP;Acrosin-binding protein	ACRBP	Q8NEB7	-0.0618601	0.0141833	1.29851e-05	0.0183999	0.146931	0.0140825	2.03529e-25	2.88401e-22	0.00154059	0.00723612	0.831406	1	0.00453228	0.00721004	0.529611	1	0.0850818	0.0070327	1.26128e-33	1.78724e-30	0.00387775	0.00535618	0.469085	1
ACRV1;Acrosomal protein SP-10	ACRV1	P26436	-0.0159049	0.00950481	0.0942747	1	0.0114907	0.0094373	0.223396	1	-0.00338606	0.00484923	0.485018	1	-0.0117987	0.00483217	0.0146234	1	-0.00291745	0.00471331	0.535933	1	-0.00718281	0.00358971	0.0454059	1
ACSL1;Long-chain-fatty-acid--CoA ligase 1	ACSL1	P33121	0.0410061	0.0143092	0.00416506	1	-0.0469104	0.0142075	0.000962405	1	0.0114564	0.00730035	0.116597	1	0.0109205	0.00726329	0.132712	1	-0.022204	0.00708464	0.00172519	1	0.0108959	0.00539574	0.0434579	1
ACTA2;Actin, aortic smooth muscle	ACTA2	P62736	-0.0527301	0.0129599	4.74585e-05	0.0672487	0.0410234	0.0128678	0.00143458	1	0.00714642	0.00661195	0.279785	1	-0.021533	0.006589	0.00108404	1	0.00517811	0.00642693	0.420427	1	0.00579573	0.00489482	0.2364	1
ACTN2;Alpha-actinin-2	ACTN2	P35609	0.000908097	0.0139503	0.948099	1	-0.0315145	0.0138512	0.0229041	1	0.00651114	0.00711727	0.360289	1	-0.0384932	0.00707124	5.25537e-08	7.44686e-05	-0.00688977	0.00689731	0.317847	1	0.0161797	0.00525307	0.00207129	1
ACTN4;Alpha-actinin-4	ACTN4	O43707	-0.025591	0.0142884	0.0733031	1	0.0267238	0.0141869	0.059621	1	0.0129272	0.00728975	0.0761875	1	-0.00267618	0.00725803	0.712339	1	0.011805	0.00707951	0.0954274	1	-0.00582779	0.00539183	0.279769	1
ACVRL1;Serine/threonine-protein kinase receptor R3	ACVRL1	P37023	-0.0696945	0.0127098	4.2219e-08	5.98244e-05	0.139956	0.0126196	1.70174e-28	2.41137e-25	0.0144383	0.0064844	0.0259843	1	0.0133721	0.00649626	0.0395556	1	0.0579567	0.00633647	6.18556e-20	8.76494e-17	0.0105021	0.00482593	0.0295485	1
ACY1;Aminoacylase-1	ACY1	Q03154	-0.230902	0.012075	9.12088e-81	1.29243e-77	0.383833	0.0119893	3.36348e-219	4.76605e-216	-0.0171173	0.00616052	0.00546534	1	-0.0183123	0.00620587	0.00317166	1	0.191619	0.00605323	6.97798e-217	9.88779e-214	-0.0436317	0.00461021	3.13667e-21	4.44467e-18
ACY3;N-acyl-aromatic-L-amino acid amidohydrolase	ACY3	Q96HD9	-0.171798	0.0138289	2.66621e-35	3.77802e-32	0.194385	0.0137306	2.84104e-45	4.02576e-42	0.00255098	0.00705531	0.717678	1	-0.0572756	0.00703972	4.21592e-16	5.97395e-13	0.081738	0.00686656	1.30641e-32	1.85118e-29	-0.00167346	0.00522965	0.748974	1
ACYP1;Acylphosphatase-1	ACYP1	P07311	-0.106231	0.0141029	5.19276e-14	7.35814e-11	0.177322	0.0140027	1.31747e-36	1.86685e-33	0.00923529	0.00719511	0.199314	1	0.00325169	0.00714572	0.649073	1	0.127788	0.00696996	9.8628e-75	1.39756e-71	0.0084298	0.0053084	0.112293	1
ADA;Adenosine deaminase	ADA	P00813	-0.10213	0.0140493	3.74952e-13	5.31307e-10	0.164638	0.0139496	4.88311e-32	6.91936e-29	0.0178087	0.00716779	0.0129802	1	-6.80206e-05	0.00713491	0.992394	1	0.0955882	0.00695942	8.06941e-43	1.14344e-39	0.00518803	0.00530037	0.327683	1
ADA2;Adenosine deaminase 2	ADA2	Q9NZK5	-0.159664	0.0136631	1.92153e-31	2.7228e-28	0.128861	0.0135661	2.36312e-21	3.34854e-18	-0.0121782	0.00697075	0.0806457	1	-0.0781402	0.00694791	2.70087e-29	3.82714e-26	0.0272526	0.00677701	5.79916e-05	0.0821741	-0.00095268	0.00516145	0.853563	1
ADAM12;Disintegrin and metalloproteinase domain-containing protein 12	ADAM12	O43184	-0.130035	0.0134742	5.47146e-22	7.75306e-19	0.124607	0.0133785	1.35949e-20	1.92639e-17	0.00660305	0.00687435	0.336798	1	-0.0490957	0.00686895	9.0102e-13	1.27675e-09	0.0480318	0.0067	7.70708e-13	1.09209e-09	0.00117686	0.00510279	0.817604	1
ADAM15;Disintegrin and metalloproteinase domain-containing protein 15	ADAM15	Q13444	-0.0814665	0.0141318	8.30062e-09	1.1762e-05	0.0216673	0.0140314	0.122555	1	-0.00859937	0.00720984	0.232991	1	-0.0656436	0.00717145	5.80157e-20	8.22083e-17	-0.00567093	0.00699505	0.41754	1	-0.0124822	0.00532751	0.0191368	1
ADAM22;Disintegrin and metalloproteinase domain-containing protein 22	ADAM22	Q9P0K1	-0.0748517	0.0138133	6.07113e-08	8.60279e-05	0.146572	0.0137152	1.39103e-26	1.97109e-23	0.00644839	0.00704737	0.3602	1	-0.0114711	0.00703771	0.10312	1	0.0571995	0.0068646	8.19546e-17	1.1613e-13	0.00998742	0.00522816	0.0561009	1
ADAM23;Disintegrin and metalloproteinase domain-containing protein 23	ADAM23	O75077	-0.0136682	0.0141856	0.335296	1	0.0625429	0.0140848	9.02661e-06	0.0127907	-0.0092767	0.00723729	0.199931	1	0.00354081	0.00720649	0.623192	1	0.0371576	0.00702924	1.25663e-07	0.000178065	-0.00215237	0.00535355	0.687652	1
ADAM8;Disintegrin and metalloproteinase domain-containing protein 8	ADAM8	P78325	-0.167387	0.0138922	2.58127e-33	3.65766e-30	0.18147	0.0137935	2.31137e-39	3.27521e-36	0.0191163	0.0070876	0.00699969	1	-0.0764231	0.00706151	2.97313e-27	4.21292e-24	0.0918773	0.00688782	1.71901e-40	2.43584e-37	0.0269582	0.00524584	2.77717e-07	0.000393525
ADAM9;Disintegrin and metalloproteinase domain-containing protein 9	ADAM9	Q13443	-0.157343	0.0138177	6.04102e-30	8.56012e-27	0.113212	0.0137196	1.65808e-16	2.34949e-13	-0.0120218	0.00704961	0.0881507	1	-0.0897803	0.00703649	3.34692e-37	4.74259e-34	0.0332516	0.00686341	1.27299e-06	0.00180382	0.00647268	0.00522725	0.215629	1
ADAMTS1;A disintegrin and metalloproteinase with thrombospondin motifs 1	ADAMTS1	Q9UHI8	-0.0663034	0.0141099	2.63131e-06	0.00372857	0.105562	0.0140097	5.09945e-14	7.22593e-11	0.00890226	0.00719868	0.216231	1	-0.00567853	0.00717437	0.428656	1	0.0444104	0.0069979	2.23315e-10	3.16437e-07	-0.00796444	0.00532968	0.135091	1
ADAMTS13;A disintegrin and metalloproteinase with thrombospondin motifs 13	ADAMTS13	Q76LX8	-0.0101242	0.0140317	0.470598	1	0.0759088	0.0139321	5.14179e-08	7.28591e-05	0.0106369	0.00715881	0.137334	1	0.0249076	0.00712838	0.000476156	0.674712	0.0462301	0.00695305	2.99595e-11	4.24527e-08	0.00393087	0.00529552	0.45791	1
ADAMTS15;A disintegrin and metalloproteinase with thrombospondin motifs 15	ADAMTS15	Q8TE58	-0.155971	0.0127331	2.27251e-34	3.22015e-31	0.292143	0.0126427	1.45246e-116	2.05813e-113	0.0402231	0.00649626	6.07027e-10	8.60157e-07	0.00274061	0.00649627	0.673119	1	0.167146	0.00633648	7.25873e-152	1.02856e-148	0.0376676	0.00482593	6.10228e-15	8.64693e-12
ADAMTS16;A disintegrin and metalloproteinase with thrombospondin motifs 16	ADAMTS16	Q8TE57	0.0145286	0.0133601	0.276846	1	0.0247017	0.0132652	0.0625985	1	-0.00805065	0.00681616	0.237572	1	0.0250516	0.00680159	0.000230676	0.326868	0.0158802	0.00663429	0.0166869	1	-0.00925397	0.00505275	0.0670387	1
ADAMTS4;A disintegrin and metalloproteinase with thrombospondin motifs 4	ADAMTS4	O75173	-0.106822	0.0138438	1.25585e-14	1.77954e-11	0.162137	0.0137454	5.28735e-32	7.49217e-29	0.0115134	0.00706291	0.103093	1	-0.0163343	0.00703784	0.0202963	1	0.0909661	0.00686473	5.53291e-40	7.84013e-37	0.0116481	0.00522825	0.0258924	1
ADAMTS8;A disintegrin and metalloproteinase with thrombospondin motifs 8	ADAMTS8	Q9UP79	0.0553756	0.0140941	8.55986e-05	0.121293	-0.0180234	0.013994	0.197783	1	0.00171358	0.00719063	0.811645	1	0.0387926	0.00715042	5.82623e-08	8.25576e-05	-0.000402863	0.00697454	0.953939	1	0.00678129	0.00531189	0.201743	1
ADAMTSL2;ADAMTS-like protein 2	ADAMTSL2	Q86TH1	-0.252365	0.0127427	1.93893e-86	2.74746e-83	0.266024	0.0126522	4.59747e-97	6.51461e-94	-0.00921514	0.00650114	0.156363	1	-0.0949142	0.0065149	6.11709e-48	8.66792e-45	0.124627	0.00635465	3.48931e-85	4.94435e-82	-0.0284341	0.00483978	4.26433e-09	6.04256e-06
ADAMTSL4;ADAMTS-like protein 4	ADAMTSL4	Q6UY14	-0.107051	0.0138165	9.79036e-15	1.38729e-11	0.163082	0.0137184	1.77471e-32	2.51476e-29	-0.000174625	0.007049	0.980236	1	-0.00673208	0.00703202	0.3384	1	0.06595	0.00685906	7.3494e-22	1.04141e-18	0.00661446	0.00522394	0.205456	1
ADAMTSL5;ADAMTS-like protein 5	ADAMTSL5	Q6ZMM2	-0.067365	0.0141707	2.01028e-06	0.00284856	0.0278751	0.01407	0.0475863	1	0.00313805	0.0072297	0.664257	1	-0.0431349	0.00719436	2.04637e-09	2.89971e-06	-0.0023057	0.0070174	0.742483	1	0.00657781	0.00534453	0.218423	1
ADCYAP1R1;Pituitary adenylate cyclase-activating polypeptide type I receptor	ADCYAP1R1	P41586	0.0152812	0.0143172	0.285834	1	0.0115261	0.0142155	0.417486	1	-0.00911171	0.00730445	0.212259	1	0.0105761	0.0072703	0.145762	1	0.0042487	0.00709147	0.549091	1	-0.00489881	0.00540094	0.364398	1
ADD1;Alpha-adducin	ADD1	P35611	-0.128316	0.0141146	1.07377e-19	1.52154e-16	0.201296	0.0140144	1.51862e-46	2.15188e-43	0.0197487	0.00720109	0.00610356	1	-0.0210392	0.00715054	0.00325964	1	0.136081	0.00697465	2.47583e-84	3.50825e-81	0.0272983	0.00531198	2.7767e-07	0.000393459
ADGRB3;Adhesion G protein-coupled receptor B3	ADGRB3	O60242	0.0265475	0.0140392	0.0586456	1	-0.0137458	0.0139395	0.324095	1	-0.00752278	0.00716264	0.293602	1	0.0102963	0.00712352	0.148356	1	-0.0157532	0.0069483	0.0233838	1	-0.00353337	0.0052919	0.504333	1
ADGRD1;Adhesion G-protein coupled receptor D1	ADGRD1	Q6QNK2	-0.107582	0.0125128	8.73558e-18	1.23783e-14	0.198584	0.0124239	3.82658e-57	5.42226e-54	0.00510635	0.00638385	0.423787	1	0.0166037	0.00635901	0.00903016	1	0.119094	0.0062026	9.57844e-82	1.35727e-78	-0.0044593	0.00472397	0.345189	1
ADGRE1;Adhesion G protein-coupled receptor E1	ADGRE1	Q14246	-0.167192	0.0138963	3.19079e-33	4.52135e-30	0.153013	0.0137976	1.71206e-28	2.42598e-25	0.0117756	0.00708972	0.096743	1	-0.0761861	0.0070572	3.98518e-27	5.647e-24	0.0614193	0.00688361	4.77182e-19	6.76167e-16	0.0226326	0.00524264	1.58578e-05	0.0224705
ADGRE2;Adhesion G protein-coupled receptor E2	ADGRE2	Q9UHX3	-0.0822546	0.0135309	1.23167e-09	1.74527e-06	0.0647091	0.0134348	1.47173e-06	0.00208545	-0.00719594	0.00690327	0.297241	1	-0.0371952	0.00686737	6.12668e-08	8.6815e-05	0.00451762	0.00669845	0.500044	1	0.000487032	0.00510161	0.923945	1
ADGRE5;Adhesion G protein-coupled receptor E5	ADGRE5	P48960	-0.0952294	0.0134938	1.7553e-12	2.48727e-09	0.0759838	0.0133979	1.43736e-08	2.03674e-05	-0.0202677	0.00688435	0.0032436	1	-0.0382218	0.00685116	2.43855e-08	3.45543e-05	-0.00436208	0.00668264	0.513923	1	-0.0118582	0.00508958	0.0198173	1
ADGRF5;Adhesion G protein-coupled receptor F5	ADGRF5	Q8IZF2	-0.0792055	0.0138505	1.08996e-08	1.54447e-05	0.169256	0.0137522	1.11098e-34	1.57425e-31	0.0134609	0.00706637	0.0568052	1	0.00438862	0.00701772	0.531737	1	0.11409	0.0068451	3.91373e-62	5.54576e-59	0.0211421	0.00521331	5.01536e-05	0.0710676
ADGRG1;Adhesion G-protein coupled receptor G1	ADGRG1	Q9Y653	-0.266726	0.0127197	1.46976e-96	2.08265e-93	0.174976	0.0126294	1.9189e-43	2.71908e-40	-0.036883	0.00648943	1.33825e-08	1.89631e-05	-0.162497	0.00647	5.52154e-138	7.82402e-135	0.0486515	0.00631085	1.29942e-14	1.84127e-11	-0.0475209	0.00480642	5.08033e-23	7.19883e-20
ADGRG2;Adhesion G-protein coupled receptor G2	ADGRG2	Q8IZP9	0.206246	0.0126941	5.71949e-59	8.10452e-56	-0.124566	0.0126039	5.5837e-23	7.9121e-20	-0.00344161	0.00647636	0.59514	1	0.141502	0.00644717	4.6606e-106	6.60407e-103	-0.0492813	0.00628859	4.7575e-15	6.74137e-12	-0.00689491	0.00478946	0.14999	1
ADGRV1;Adhesion G-protein coupled receptor V1	ADGRV1	Q8WXG9	0.00422483	0.0143199	0.767973	1	-0.00953156	0.0142182	0.502626	1	0.00319357	0.00730584	0.662025	1	-0.00356599	0.00727181	0.623864	1	-0.00251798	0.00709294	0.722593	1	0.00266705	0.00540207	0.621515	1
ADH1B;All-trans-retinol dehydrogenase	ADH1B	P00325	-0.121792	0.0129056	4.25291e-21	6.02638e-18	0.30332	0.012814	3.85949e-122	5.4689e-119	-0.0138631	0.00658428	0.035262	1	0.0249527	0.0066011	0.00015703	0.222511	0.159938	0.00643873	4.82953e-135	6.84344e-132	-0.0330637	0.00490381	1.5813e-11	2.24071e-08
ADH4;All-trans-retinol dehydrogenase [NAD(+)] ADH4	ADH4	P08319	-0.222118	0.012251	7.30877e-73	1.03565e-69	0.410284	0.012164	2.09022e-242	2.96185e-239	0.00409498	0.00625029	0.512368	1	-0.0148824	0.00628753	0.0179395	1	0.222171	0.00613288	3.60249e-282	5.10472e-279	-0.0196112	0.00467087	2.69213e-05	0.0381474
ADIPOQ;Adiponectin	ADIPOQ	Q15848	0.279381	0.011248	4.29039e-134	6.07948e-131	-0.425137	0.0111681	7.4491e-306	1.05554e-302	-0.00313209	0.00573857	0.585212	1	0.0829647	0.00578903	1.88242e-46	2.66739e-43	-0.220643	0.00564663	0	0	0.0148869	0.00430054	0.000537558	0.761719
ADM;Pro-adrenomedullin	ADM	P35318	-0.150646	0.0116029	2.19709e-38	3.11327e-35	0.188381	0.0115205	1.06106e-59	1.50352e-56	0.0163361	0.00591966	0.00579196	1	-0.0429505	0.00588903	3.08792e-13	4.37559e-10	0.0927496	0.00574417	1.94158e-58	2.75122e-55	0.0103756	0.00437483	0.0177142	1
ADRA2A;Alpha-2A adrenergic receptor	ADRA2A	P08913	-0.00352986	0.0142961	0.804981	1	-0.0124037	0.0141946	0.38222	1	-0.00114906	0.00729371	0.87482	1	-0.00892511	0.00725955	0.218919	1	-0.0122441	0.00708099	0.0837897	1	0.00179138	0.00539296	0.739763	1
AFAP1;Actin filament-associated protein 1	AFAP1	Q8N556	0.0171482	0.0141707	0.22625	1	0.0413457	0.01407	0.00330123	1	0.0131008	0.0072297	0.0699898	1	0.0268834	0.00718113	0.000181679	0.257439	0.0434964	0.0070045	5.36487e-10	7.60203e-07	0.010345	0.00533471	0.0524871	1
AFM;Afamin	AFM	P43652	-0.131425	0.0127763	9.37545e-25	1.3285e-21	0.311027	0.0126856	9.24264e-131	1.30968e-127	-0.00870565	0.00651832	0.181706	1	0.0336382	0.00649452	2.23728e-07	0.000317023	0.178467	0.00633477	1.04314e-172	1.47813e-169	-0.00314076	0.00482463	0.515061	1
AFP;Alpha-fetoprotein	AFP	P02771	0.0948294	0.0137616	5.7164e-12	8.10013e-09	0.0403233	0.0136639	0.0031704	1	0.017626	0.00702101	0.0120653	1	0.0893694	0.00698218	1.9962e-37	2.82862e-34	0.0618724	0.00681044	1.09018e-19	1.54479e-16	0.00119164	0.00518691	0.818295	1
AGBL2;Cytosolic carboxypeptidase 2	AGBL2	Q5U5Z8	0.0153088	0.0143132	0.284832	1	0.00184689	0.0142115	0.896602	1	-0.0169964	0.00730241	0.0199483	1	0.018575	0.0072688	0.0106093	1	-7.78048e-05	0.00709001	0.991244	1	0.000253827	0.00539983	0.962508	1
AGER;Advanced glycosylation end product-specific receptor	AGER	Q15109	-0.0222612	0.0135623	0.100728	1	0.0936409	0.0134659	3.66615e-12	5.19493e-09	0.0136951	0.00691929	0.0478007	1	0.00991789	0.00687099	0.148904	1	0.053968	0.00670198	8.3612e-16	1.18478e-12	0.0230602	0.0051043	6.269e-06	0.00888317
AGR2;Anterior gradient protein 2 homolog	AGR2	O95994	-0.229551	0.01397	2.89946e-60	4.10854e-57	0.232821	0.0138708	8.73059e-63	1.23712e-59	0.0142656	0.00712733	0.0453491	1	-0.124966	0.0070994	4.6698e-69	6.61711e-66	0.123704	0.00692477	4.62909e-71	6.55943e-68	0.0132247	0.00527398	0.0121623	1
AGR3;Anterior gradient protein 3	AGR3	Q8TD06	-0.165525	0.0134577	1.22496e-34	1.73577e-31	0.35713	0.0133622	1.43318e-154	2.03082e-151	-0.0034092	0.00686596	0.619522	1	-0.0136312	0.00682709	0.0458726	1	0.245194	0.00665917	2.92772e-291	4.14858e-288	-0.0216984	0.0050717	1.88803e-05	0.0267534
AGRN;Agrin	AGRN	O00468	-0.170629	0.0131184	1.62128e-38	2.29736e-35	0.31506	0.0130252	2.26706e-127	3.21243e-124	0.0128707	0.00669285	0.0544882	1	-0.0285807	0.00670759	2.04084e-05	0.0289188	0.175903	0.0065426	1.25655e-157	1.78053e-154	0.0200774	0.00498292	5.6074e-05	0.0794569
AGRP;Agouti-related protein	AGRP	O00253	-0.489475	0.012241	0	0	0.8034	0.0121541	0	0	0.130755	0.0062452	2.87512e-96	4.07405e-93	-0.0814037	0.00639895	5.42317e-37	7.68464e-34	0.444694	0.00624155	0	0	0.114845	0.00475364	6.55345e-128	9.28625e-125
AGT;Angiotensinogen	AGT	P01019	-0.0810067	0.0141434	1.03426e-08	1.46555e-05	0.117301	0.014043	7.09887e-17	1.00591e-13	0.00395719	0.0072158	0.583419	1	0.00285553	0.00718738	0.691151	1	0.0354774	0.00701059	4.20142e-07	0.000595341	-0.00492497	0.00533934	0.35633	1
AGXT;Serine--pyruvate aminotransferase	AGXT	P21549	-0.139755	0.0136198	1.21848e-24	1.72658e-21	0.227882	0.0135231	2.89064e-63	4.09604e-60	-0.0103848	0.00694864	0.13506	1	-0.0130266	0.00693936	0.0604989	1	0.118894	0.00676867	8.92908e-69	1.26525e-65	-0.0274162	0.0051551	1.05394e-07	0.000149343
AHCY;Adenosylhomocysteinase	AHCY	P23526	-0.0488358	0.0140836	0.000526317	0.745792	0.103954	0.0139835	1.09744e-13	1.55507e-10	0.00596146	0.00718525	0.406729	1	0.0013386	0.00716629	0.851826	1	0.0583411	0.00699002	7.29475e-17	1.03367e-13	0.00466098	0.00532368	0.381298	1
AHNAK;Neuroblast differentiation-associated protein AHNAK	AHNAK	Q09666	-0.0795048	0.0130311	1.07314e-09	1.52064e-06	0.215233	0.0129386	1.04226e-61	1.47688e-58	0.0340415	0.00664832	3.07933e-07	0.000436341	0.0301201	0.00662711	5.51207e-06	0.0078106	0.132129	0.0064641	2.511e-92	3.55809e-89	0.0416914	0.00492313	2.58128e-17	3.65768e-14
AHNAK2;Protein AHNAK2	AHNAK2	Q8IVF2	-0.0156026	0.0138908	0.261351	1	0.0588334	0.0137921	2.00197e-05	0.0283679	-0.00171942	0.00708689	0.808302	1	-0.00329722	0.00707199	0.641049	1	0.043148	0.00689804	4.01784e-10	5.69328e-07	0.0151967	0.00525362	0.00382274	1
AHSA1;Activator of 90 kDa heat shock protein ATPase homolog 1	AHSA1	O95433	-0.0540606	0.0142938	0.000155974	0.221015	0.0752967	0.0141923	1.13614e-07	0.000160991	-0.00647685	0.00729251	0.37447	1	-0.0188489	0.00725901	0.0094183	1	0.0498631	0.00708046	1.92479e-12	2.72743e-09	-0.00584978	0.00539256	0.278023	1
AHSG;Alpha-2-HS-glycoprotein	AHSG	P02765	-0.0488211	0.0139691	0.00047524	0.673416	0.197243	0.0138699	1.15233e-45	1.63285e-42	0.0120663	0.00712686	0.0904568	1	0.0499408	0.00712067	2.36616e-12	3.35285e-09	0.108099	0.00694552	1.94642e-54	2.75807e-51	0.00879374	0.00528979	0.0964414	1
AHSP;Alpha-hemoglobin-stabilizing protein	AHSP	Q9NZD4	-0.109875	0.0137024	1.12914e-15	1.6e-12	0.11306	0.0136051	1.0182e-16	1.44278e-13	0.00242933	0.00699079	0.728216	1	-0.0318138	0.00695797	4.84081e-06	0.00685943	0.089352	0.00678683	1.71821e-39	2.43471e-36	-0.00120886	0.00516892	0.815086	1
AIDA;Axin interactor, dorsalization-associated protein	AIDA	Q96BJ3	-0.042032	0.0142907	0.00327316	1	0.0501837	0.0141892	0.000406026	0.575339	0.00261529	0.00729094	0.719821	1	-0.0169848	0.00726116	0.0193344	1	0.0110452	0.00708255	0.118887	1	0.000879331	0.00539415	0.870507	1
AIF1;Allograft inflammatory factor 1	AIF1	P55008	-0.0649433	0.014145	4.43369e-06	0.00628254	0.159569	0.0140446	8.06844e-30	1.1433e-26	0.0110213	0.00721661	0.126726	1	0.00273337	0.00718998	0.703826	1	0.107497	0.00701312	7.36007e-53	1.04292e-49	0.0110983	0.00534127	0.0377309	1
AIF1L;Allograft inflammatory factor 1-like	AIF1L	Q9BQI0	0.00288906	0.0142602	0.839453	1	0.0249276	0.0141589	0.0783286	1	0.0108902	0.00727536	0.134447	1	0.0101705	0.00724742	0.160527	1	0.01242	0.00706916	0.0789375	1	0.013266	0.00538395	0.0137446	1
AIFM1;Apoptosis-inducing factor 1, mitochondrial	AIFM1	O95831	-0.15608	0.0137996	1.44081e-29	2.04162e-26	0.279876	0.0137016	8.96905e-92	1.27091e-88	0.0115678	0.00704036	0.100385	1	-0.0335347	0.00702796	1.83483e-06	0.00259995	0.170402	0.00685509	3.12316e-135	4.42552e-132	0.00965633	0.00522092	0.0643871	1
AK1;Adenylate kinase isoenzyme 1	AK1	P00568	-0.0830532	0.0139855	2.92508e-09	4.14484e-06	0.118885	0.0138862	1.19735e-17	1.69664e-14	0.00543737	0.00713522	0.446041	1	0.000661239	0.00707511	0.925539	1	0.0987887	0.00690108	2.38078e-46	3.37356e-43	0.00475797	0.00525594	0.365336	1
AK2;Adenylate kinase 2, mitochondrial	AK2	P54819	-0.0436381	0.0142314	0.0021701	1	0.131537	0.0141303	1.42675e-20	2.0217e-17	0.00365473	0.00726069	0.614718	1	0.0137669	0.00723533	0.0570837	1	0.0782902	0.00705737	1.50575e-28	2.13364e-25	0.00482927	0.00537497	0.368939	1
AKAP12;A-kinase anchor protein 12	AKAP12	Q02952	0.0614088	0.014219	1.57674e-05	0.0223424	-0.0346839	0.014118	0.0140303	1	-0.0050284	0.00725436	0.488221	1	0.0356663	0.00721902	7.82401e-07	0.00110866	-0.011515	0.00704145	0.101991	1	0.00568634	0.00536285	0.289006	1
AKR1B1;Aldo-keto reductase family 1 member B1	AKR1B1	P15121	-0.0469587	0.0142246	0.00096433	1	0.132016	0.0141235	9.94547e-21	1.40927e-17	0.000209632	0.00725719	0.976956	1	0.0173141	0.0072295	0.0166289	1	0.0798131	0.00705167	1.1982e-29	1.69785e-26	-0.00328386	0.00537063	0.540908	1
AKR1B10;Aldo-keto reductase family 1 member B10	AKR1B10	O60218	-0.086456	0.0141783	1.09607e-09	1.55314e-06	0.0906869	0.0140776	1.20758e-10	1.71114e-07	-0.0120732	0.00723361	0.0951247	1	-0.0197705	0.00720326	0.00606049	1	0.0231254	0.00702608	0.000998026	1	-0.0147586	0.00535114	0.00581805	1
AKR1C4;Aldo-keto reductase family 1 member C4	AKR1C4	P17516	-0.0991318	0.0142425	3.50466e-12	4.9661e-09	0.118476	0.0141414	5.74595e-17	8.14201e-14	0.00733284	0.00726635	0.312915	1	-0.0148392	0.00724005	0.0404114	1	0.0419466	0.00706197	2.88061e-09	4.08182e-06	-0.00982314	0.00537847	0.0678014	1
AKR7L;Aflatoxin B1 aldehyde reductase member 4	AKR7L	Q8NHP1	-0.157504	0.0138476	6.99613e-30	9.91352e-27	0.220338	0.0137492	1.98271e-57	2.80949e-54	-0.00950036	0.00706484	0.178726	1	-0.0258965	0.00707489	0.000252252	0.357441	0.0835891	0.00690087	1.05381e-33	1.49325e-30	-0.0317811	0.00525578	1.49149e-09	2.11343e-06
AKT1S1;Proline-rich AKT1 substrate 1	AKT1S1	Q96B36	-0.116324	0.0140933	1.63085e-16	2.31091e-13	0.232084	0.0139932	2.35233e-61	3.33326e-58	0.0105129	0.00719023	0.143728	1	0.00502357	0.00715467	0.482597	1	0.146949	0.00697869	7.94364e-98	1.12561e-94	0.0131552	0.00531505	0.0133254	1
AKT2;RAC-beta serine/threonine-protein kinase	AKT2	P31751	-0.0204248	0.0142156	0.150793	1	0.131484	0.0141146	1.34111e-20	1.90035e-17	0.00657678	0.0072526	0.364515	1	0.0368096	0.00722325	3.48709e-07	0.000494121	0.084359	0.00704558	5.68066e-33	8.0495e-30	0.00482483	0.00536599	0.368579	1
AKT3;RAC-gamma serine/threonine-protein kinase	AKT3	Q9Y243	-0.00498586	0.0142295	0.726051	1	0.107473	0.0141284	2.93618e-14	4.16056e-11	-0.00547037	0.0072597	0.451144	1	0.0392329	0.00723046	5.79904e-08	8.21724e-05	0.0680814	0.00705261	5.06541e-22	7.17768e-19	0.00133869	0.00537135	0.803187	1
ALCAM;CD166 antigen	ALCAM	Q13740	-0.0514544	0.0131507	9.15949e-05	0.12979	0.116846	0.0130573	3.91363e-19	5.54562e-16	0.00243598	0.00670934	0.716555	1	0.00151491	0.00668782	0.8208	1	0.0419828	0.00652332	1.24402e-10	1.76277e-07	-0.00368085	0.00496823	0.458773	1
ALDH1A1;Retinal dehydrogenase 1	ALDH1A1	P00352	-0.178267	0.013269	5.76044e-41	8.16255e-38	0.247758	0.0131747	3.38052e-78	4.7902e-75	-0.0197568	0.00676967	0.00352205	1	-0.021044	0.00675619	0.00184234	1	0.142829	0.00659001	1.7307e-103	2.45241e-100	-0.0322065	0.00501903	1.40855e-10	1.99592e-07
ALDH2;Aldehyde dehydrogenase, mitochondrial	ALDH2	P05091	-0.0925407	0.0142697	9.08069e-11	1.28673e-07	0.096088	0.0141684	1.22053e-11	1.72949e-08	-0.00343676	0.00728023	0.636884	1	-0.0355401	0.00725342	9.63757e-07	0.00136564	0.0454353	0.007075	1.36258e-10	1.93077e-07	-0.00449142	0.0053884	0.404549	1
ALDH3A1;Aldehyde dehydrogenase, dimeric NADP-preferring	ALDH3A1	P30838	-0.0800161	0.0133807	2.2713e-09	3.21844e-06	0.120172	0.0132857	1.6311e-19	2.31127e-16	-0.00776805	0.00682668	0.255179	1	0.00554877	0.00682531	0.416242	1	0.0297656	0.00665743	7.80867e-06	0.0110649	-0.0128757	0.00507037	0.0111087	1
ALDH5A1;Succinate-semialdehyde dehydrogenase, mitochondrial	ALDH5A1	P51649	-0.0882004	0.0141969	5.31544e-10	7.53198e-07	0.15073	0.014096	1.30089e-26	1.84336e-23	-0.0103284	0.00724305	0.153891	1	-0.0174394	0.00721932	0.0157117	1	0.0929443	0.00704174	1.10384e-39	1.56415e-36	-0.0104654	0.00536307	0.0510195	1
ALMS1;Alstrom syndrome protein 1	ALMS1	Q8TCU4	0.0111573	0.0143214	0.435949	1	-0.0130368	0.0142196	0.35925	1	-0.00217889	0.00730657	0.765546	1	0.0037677	0.00727084	0.604326	1	0.00016942	0.007092	0.980941	1	0.0142037	0.00540134	0.00855065	1
ALPI;Intestinal-type alkaline phosphatase	ALPI	P09923	-0.192227	0.0141987	1.43414e-41	2.03218e-38	0.141531	0.0140978	1.17094e-23	1.65923e-20	-0.0104947	0.00724397	0.147425	1	-0.141849	0.00720571	8.28984e-86	1.17467e-82	0.100591	0.00702847	2.48545e-46	3.52188e-43	0.00564965	0.00535296	0.291238	1
ALPP;Alkaline phosphatase, placental type	ALPP	P05187	-0.0703815	0.0118442	2.85904e-09	4.05127e-06	0.0790701	0.0117601	1.8222e-11	2.58205e-08	0.000461966	0.00604276	0.939062	1	-0.0261629	0.00604	1.48439e-05	0.0210337	0.0427326	0.00589144	4.14993e-13	5.88045e-10	-0.00175962	0.00448698	0.694942	1
AMBN;Ameloblastin	AMBN	Q9NP70	0.00408196	0.0142639	0.774747	1	-0.0260992	0.0141625	0.065369	1	-0.00240945	0.00727723	0.740576	1	-0.0175217	0.00723976	0.0155166	1	-0.0307961	0.00706168	1.2983e-05	0.0183969	0.00286132	0.00537825	0.594719	1
AMBP;Protein AMBP	AMBP	P02760	-0.205954	0.0127201	1.409e-58	1.99655e-55	0.357105	0.0126297	2.18569e-172	3.09712e-169	0.0623566	0.00648961	8.21891e-22	1.16462e-18	-0.00079208	0.00650608	0.903102	1	0.168423	0.00634604	1.09499e-153	1.5516e-150	0.0378886	0.00483322	4.66115e-15	6.60485e-12
AMDHD2;N-acetylglucosamine-6-phosphate deacetylase	AMDHD2	Q9Y303	0.0206004	0.014323	0.150371	1	-0.0292508	0.0142213	0.0397155	1	-0.00884999	0.00730741	0.225872	1	-0.00486197	0.00727256	0.503796	1	0.00299033	0.00709368	0.673357	1	0.0167142	0.00540263	0.00197815	1
AMFR;E3 ubiquitin-protein ligase AMFR	AMFR	Q9UKV5	-0.059877	0.0142535	2.67081e-05	0.0378454	0.104949	0.0141522	1.25932e-13	1.78445e-10	0.00681635	0.00727194	0.34859	1	0.00476768	0.00724074	0.510252	1	0.0521716	0.00706264	1.53509e-13	2.17523e-10	0.00205373	0.00537899	0.702608	1
AMIGO1;Amphoterin-induced protein 1	AMIGO1	Q86WK6	-0.0249554	0.0143163	0.0813242	1	0.0279968	0.0142146	0.0489011	1	0.00159655	0.00730399	0.826975	1	-0.0104918	0.00726986	0.148977	1	0.0123452	0.00709104	0.0817003	1	0.00445988	0.00540062	0.408918	1
AMIGO2;Amphoterin-induced protein 2	AMIGO2	Q86SJ2	-0.085509	0.0140607	1.21352e-09	1.71956e-06	0.136937	0.0139608	1.16636e-22	1.65274e-19	-0.00620729	0.00717358	0.386886	1	-0.0370093	0.00715345	2.30841e-07	0.000327102	0.077816	0.0069775	7.78763e-29	1.10351e-25	-0.000617483	0.00531414	0.907498	1
AMN;Protein amnionless	AMN	Q9BXJ7	-0.148854	0.0139558	1.73744e-26	2.46195e-23	0.247172	0.0138567	1.32136e-70	1.87236e-67	0.0211467	0.00712009	0.00298165	1	-0.018379	0.00711035	0.00974677	1	0.132252	0.00693545	1.16728e-80	1.65403e-77	0.00580407	0.00528212	0.271856	1
AMOT;Angiomotin	AMOT	Q4VCS5	-0.238728	0.0127559	1.79457e-77	2.54291e-74	0.288535	0.0126653	2.14842e-113	3.04431e-110	-0.00957575	0.00650789	0.141197	1	-0.0952449	0.00652326	3.83736e-48	5.43754e-45	0.125698	0.00636281	2.1318e-86	3.02075e-83	-0.00410242	0.00484599	0.397246	1
AMOTL2;Angiomotin-like protein 2	AMOTL2	Q9Y2J4	-0.0398249	0.0142289	0.00513316	1	0.120729	0.0141278	1.37382e-17	1.94671e-14	0.00410411	0.0072594	0.571842	1	0.00259837	0.00722804	0.719234	1	0.0756996	0.00705025	7.49548e-27	1.06211e-23	0.0091665	0.00536955	0.0878075	1
AMPD3;AMP deaminase 3	AMPD3	Q01432	-0.116983	0.0142053	1.90534e-16	2.69987e-13	0.11063	0.0141044	4.60235e-15	6.52154e-12	0.00861744	0.00724736	0.234436	1	-0.0387744	0.00720314	7.37287e-08	0.000104474	0.0900496	0.00702597	1.60401e-37	2.27288e-34	0.0144596	0.00535106	0.0068918	1
AMY1A_AMY1B_AMY1C;Alpha-amylase 1A_Alpha-amylase 1B_Alpha-amylase 1C	AMY1A_AMY1B_AMY1C	P0DUB6_P0DTE7_P0DTE8	-0.0179985	0.0138249	0.192969	1	0.0413206	0.0137267	0.00261379	1	0.0170966	0.00705327	0.0153627	1	-0.000260331	0.00700856	0.97037	1	0.00906497	0.00683617	0.184838	1	0.0165813	0.00520651	0.00145014	1
AMY2A;Pancreatic alpha-amylase	AMY2A	P04746	-0.0134649	0.0138082	0.329504	1	0.0235768	0.0137102	0.0855105	1	0.0114621	0.00704478	0.103745	1	-0.00221106	0.00700338	0.752222	1	-0.00579688	0.00683112	0.39611	1	0.017079	0.00520266	0.00102903	1
AMY2B;Alpha-amylase 2B	AMY2B	P19961	-0.012883	0.0138768	0.353221	1	0.0181966	0.0137782	0.186626	1	0.011626	0.00707976	0.100576	1	-0.00595193	0.00704047	0.3979	1	-0.00715656	0.0068673	0.297363	1	0.015836	0.00523021	0.00246527	1
ANG;Angiogenin	ANG	P03950	-0.0584272	0.0134556	1.41766e-05	0.0200883	0.169478	0.01336	9.96904e-37	1.41261e-33	0.0434237	0.00686488	2.57958e-10	3.65527e-07	0.00972325	0.0067974	0.152601	1	0.13195	0.00663021	1.2006e-87	1.70125e-84	0.0412405	0.00504964	3.26554e-16	4.62727e-13
ANGPT1;Angiopoietin-1	ANGPT1	Q15389	-0.0977836	0.0141311	4.66622e-12	6.61203e-09	0.188872	0.0140308	4.04477e-41	5.73144e-38	0.0103322	0.00720952	0.151836	1	7.50653e-07	0.00716035	0.999916	1	0.134	0.00698422	1.26169e-81	1.78782e-78	0.00178401	0.00531926	0.737336	1
ANGPT2;Angiopoietin-2	ANGPT2	O15123	-0.200087	0.0135659	5.72864e-49	8.11748e-46	0.145131	0.0134695	5.40093e-27	7.65312e-24	0.00484956	0.00692113	0.483505	1	-0.112646	0.00691562	1.96017e-59	2.77756e-56	0.0371996	0.00674551	3.51782e-08	4.98475e-05	-0.000844895	0.00513746	0.869372	1
ANGPTL1;Angiopoietin-related protein 1	ANGPTL1	O95841	-0.17068	0.0138489	9.03398e-35	1.28011e-31	0.200022	0.0137506	1.09725e-47	1.55481e-44	0.0154545	0.00706555	0.0287322	1	-0.0550791	0.00703861	5.20605e-15	7.37697e-12	0.111787	0.00686548	2.16802e-59	3.07208e-56	0.00879221	0.00522883	0.0926768	1
ANGPTL2;Angiopoietin-related protein 2	ANGPTL2	Q9UKU9	-0.141268	0.0130678	3.67385e-27	5.20584e-24	0.3122	0.012975	4.43205e-126	6.28022e-123	0.03275	0.00666702	9.07736e-07	0.00128626	0.0328317	0.00668695	9.15711e-07	0.00129756	0.154673	0.00652247	2.40702e-123	3.41074e-120	0.026958	0.00496759	5.77599e-08	8.18458e-05
ANGPTL3;Angiopoietin-related protein 3	ANGPTL3	Q9Y5C1	0.00339496	0.0127203	0.789554	1	0.1252	0.01263	4.15073e-23	5.88158e-20	0.00982169	0.00648974	0.13019	1	0.100976	0.00642516	1.82356e-55	2.58399e-52	0.0635448	0.00626712	3.98648e-24	5.64884e-21	0.0224406	0.00477311	2.59266e-06	0.0036738
ANGPTL4;Angiopoietin-related protein 4	ANGPTL4	Q9BY76	0.0678807	0.0136433	6.56712e-07	0.000930561	-0.0971814	0.0135464	7.54735e-13	1.06946e-09	0.00742087	0.00696062	0.286382	1	-0.0277939	0.00691702	5.87677e-05	0.0832739	-0.0214067	0.00674688	0.00151086	1	0.0133277	0.0051385	0.00949922	1
ANGPTL7;Angiopoietin-related protein 7	ANGPTL7	O43827	-0.284292	0.0136291	1.41029e-95	1.99839e-92	0.346901	0.0135323	1.46395e-142	2.07441e-139	-0.00280538	0.00695339	0.686618	1	-0.0687864	0.00698178	7.17366e-23	1.01651e-19	0.153696	0.00681005	5.438e-112	7.70565e-109	-0.0335839	0.00518661	9.59877e-11	1.36015e-07
ANK2;Ankyrin-2	ANK2	Q01484	-0.00294382	0.014315	0.83707	1	0.00616408	0.0142134	0.664524	1	0.00799015	0.00730334	0.273951	1	-0.00409065	0.0072689	0.573602	1	0.00610647	0.0070901	0.389097	1	0.0135881	0.0053999	0.0118621	1
ANKMY2;Ankyrin repeat and MYND domain-containing protein 2	ANKMY2	Q8IV38	-0.0425322	0.0142149	0.00277424	1	0.146151	0.0141139	4.6114e-25	6.53436e-22	0.000714782	0.00725225	0.921489	1	0.0158116	0.00722676	0.0286821	1	0.0953068	0.00704901	1.50084e-41	2.1267e-38	0.00243474	0.0053686	0.650181	1
ANKRA2;Ankyrin repeat family A protein 2	ANKRA2	Q9H9E1	-0.0138315	0.0143191	0.334084	1	0.0155471	0.0142174	0.274176	1	0.00270475	0.00730542	0.711208	1	-0.0132843	0.00727123	0.0677134	1	0.00718343	0.00709238	0.311145	1	-0.000572758	0.00540164	0.915556	1
ANKRD54;Ankyrin repeat domain-containing protein 54	ANKRD54	Q6NXT1	-0.142639	0.0141357	6.9579e-24	9.85934e-21	0.205943	0.0140353	1.74173e-48	2.46804e-45	0.0184337	0.00721186	0.0105952	1	-0.025142	0.00716895	0.00045365	0.642822	0.136517	0.00699262	1.95477e-84	2.76991e-81	0.0153966	0.00532566	0.00384228	1
ANP32C;Acidic leucine-rich nuclear phosphoprotein 32 family member C	ANP32CP	O43423	-0.0048216	0.0143191	0.736328	1	-0.00827368	0.0142174	0.560614	1	-0.000414588	0.00730542	0.954744	1	-0.00233984	0.00726969	0.747559	1	-0.00390987	0.00709088	0.581367	1	0.0144777	0.00540049	0.00734774	1
ANPEP;Aminopeptidase N	ANPEP	P15144	0.0612848	0.0141184	1.42702e-05	0.0202208	0.0288054	0.0140181	0.0399053	1	0.00182502	0.00720303	0.799986	1	0.0911289	0.00715769	4.7622e-37	6.74804e-34	0.0157503	0.00698163	0.0240789	1	-0.0160958	0.00531729	0.00247114	1
ANXA1;Annexin A1	ANXA1	P04083	-0.0610973	0.0140634	1.40355e-05	0.0198883	0.087661	0.0139635	3.50564e-10	4.9675e-07	0.00867876	0.00717497	0.226452	1	-0.00872839	0.00713627	0.221299	1	0.0701038	0.00696074	7.96804e-24	1.12907e-20	0.0101736	0.00530138	0.0549853	1
ANXA10;Annexin A10	ANXA10	Q9UJ72	-0.078309	0.0139396	1.96142e-08	2.77933e-05	0.094433	0.0138406	9.18587e-12	1.30164e-08	0.00459919	0.00711181	0.517836	1	-0.0470118	0.00707628	3.10605e-11	4.40127e-08	0.0565315	0.00690223	2.69201e-16	3.81458e-13	0.00721092	0.00525681	0.170157	1
ANXA11;Annexin A11	ANXA11	P50995	-0.0382412	0.0141746	0.00698439	1	0.170822	0.0140739	8.85923e-34	1.25535e-30	0.0148081	0.00723168	0.040606	1	0.0421203	0.00720581	5.10009e-09	7.22683e-06	0.102749	0.00702856	2.95475e-48	4.18689e-45	0.00509959	0.00535303	0.340772	1
ANXA2;Annexin A2	ANXA2	P07355	-0.140882	0.0138506	3.05756e-24	4.33257e-21	0.196823	0.0137522	3.16381e-46	4.48313e-43	0.00118767	0.00706641	0.866528	1	-0.0551711	0.00704542	4.98375e-15	7.06197e-12	0.134948	0.00687212	2.13575e-85	3.02635e-82	0.010758	0.00523389	0.0398424	1
ANXA3;Annexin A3	ANXA3	P12429	-0.045211	0.0141865	0.00144034	1	0.132883	0.0140858	4.38599e-21	6.21495e-18	0.00253102	0.00723777	0.726571	1	0.0199215	0.00720442	0.00569212	1	0.0911306	0.00702721	2.26742e-38	3.21293e-35	0.000564093	0.005352	0.91606	1
ANXA4;Annexin A4	ANXA4	P09525	-0.00470694	0.0142402	0.740997	1	0.0927919	0.0141391	5.41473e-11	7.67267e-08	-0.00146582	0.00726519	0.840107	1	0.0395589	0.00723489	4.58768e-08	6.50075e-05	0.0601064	0.00705693	1.69615e-17	2.40344e-14	0.00031078	0.00537464	0.95389	1
ANXA5;Annexin A5	ANXA5	P08758	-0.0360961	0.0141788	0.0109109	1	0.0424695	0.0140781	0.00255863	1	0.000609183	0.00723382	0.932888	1	-0.0095674	0.00720226	0.184058	1	0.00867601	0.0070251	0.216838	1	0.0110064	0.0053504	0.0396819	1
AOC1;Amiloride-sensitive amine oxidase [copper-containing]	AOC1	P19801	-0.00117799	0.0143149	0.934416	1	0.0127754	0.0142132	0.368749	1	-0.0115927	0.00730327	0.112454	1	0.0118696	0.00726855	0.102478	1	0.0121617	0.00708977	0.0862825	1	-0.00565567	0.00539965	0.294916	1
AOC3;Membrane primary amine oxidase	AOC3	Q16853	0.0716476	0.0133949	8.95126e-08	0.000126839	-0.0507768	0.0132998	0.000135031	0.191339	-0.00816913	0.00683392	0.231953	1	0.0473496	0.00680265	3.45087e-12	4.88988e-09	-0.035598	0.00663532	8.14939e-08	0.000115477	-0.000208523	0.00505354	0.967087	1
AP1G2;AP-1 complex subunit gamma-like 2	AP1G2	O75843	-0.128649	0.0139536	3.27584e-20	4.64186e-17	0.299862	0.0138545	1.14455e-102	1.62182e-99	0.0222837	0.00711896	0.00174948	1	0.00478507	0.00710659	0.500743	1	0.182634	0.00693179	1.62049e-151	2.29623e-148	0.0310252	0.00527933	4.22189e-09	5.98242e-06
AP2B1;AP-2 complex subunit beta	AP2B1	P63010	-0.124854	0.0141678	1.32481e-18	1.87725e-15	0.220009	0.0140671	8.4146e-55	1.19235e-51	0.0263275	0.00722821	0.000270894	0.383856	-0.0289686	0.00718521	5.54928e-05	0.0786332	0.154675	0.00700848	3.2949e-107	4.66887e-104	0.0258788	0.00533774	1.25067e-06	0.0017722
AP3B1;AP-3 complex subunit beta-1	AP3B1	O00203	-0.106634	0.014048	3.32511e-14	4.71169e-11	0.238925	0.0139482	2.70724e-65	3.83616e-62	0.0204679	0.0071671	0.00429726	1	-0.00752525	0.00714019	0.291923	1	0.158841	0.00696456	2.62589e-114	3.72089e-111	0.0286413	0.00530429	6.71979e-08	9.52194e-05
AP3S2;AP-3 complex subunit sigma-2	AP3S2	P59780	-0.175657	0.0140188	7.03797e-36	9.9728e-33	0.314879	0.0139192	7.38728e-112	1.04678e-108	0.0235225	0.0071522	0.00100779	1	-0.0264992	0.00713104	0.000202686	0.287205	0.192528	0.00695564	7.54853e-167	1.06963e-163	0.0304997	0.00529749	8.61312e-09	1.22048e-05
APBB1IP;Amyloid beta A4 precursor protein-binding family B member 1-interacting protein	APBB1IP	Q7Z5R6	-0.127729	0.0136663	1.0039e-20	1.42252e-17	0.236564	0.0135692	1.49476e-67	2.11807e-64	0.0117805	0.00697236	0.0911199	1	-0.0178516	0.00695386	0.0102579	1	0.15871	0.00678282	3.63348e-120	5.14865e-117	0.0148456	0.00516587	0.00405836	1
APCS;Serum amyloid P-component	APCS	P02743	-0.0384395	0.011559	0.000884273	1	0.269586	0.0114769	2.50407e-120	3.54827e-117	0.0696699	0.00589728	4.2629e-32	6.04053e-29	0.118373	0.00581707	1.5843e-91	2.24495e-88	0.168929	0.00567399	2.14719e-192	3.04257e-189	0.0625425	0.00432137	2.45984e-47	3.4856e-44
APEX1;DNA-(apurinic or apyrimidinic site) endonuclease	APEX1	P27695	-0.180753	0.0138481	8.96059e-39	1.26972e-35	0.250019	0.0137498	2.83494e-73	4.01712e-70	0.0101677	0.00706514	0.150129	1	-0.0447985	0.00705275	2.15224e-10	3.04972e-07	0.152252	0.00687927	8.44691e-108	1.19693e-104	0.0069361	0.00523933	0.185561	1
APLP1;Amyloid-like protein 1	APLP1	P51693	0.152111	0.0135279	3.0449e-29	4.31463e-26	-0.166962	0.0134318	2.44045e-35	3.45812e-32	-0.0113387	0.00690176	0.100426	1	0.0866708	0.00685569	1.48405e-36	2.10291e-33	-0.119728	0.00668706	2.25968e-71	3.20197e-68	-0.00397515	0.00509294	0.43509	1
APOA1;Apolipoprotein A-I	APOA1	P02647	0.22852	0.01339	7.84986e-65	1.11232e-61	-0.231692	0.0132949	1.67957e-67	2.37995e-64	-0.02509	0.00683141	0.000240615	0.340951	0.173695	0.00672585	1.05599e-145	1.49633e-142	-0.155658	0.00656041	1.77382e-123	2.5135e-120	0.0928588	0.00499648	9.92721e-77	1.40669e-73
APOA2;Apolipoprotein A-II	APOA2	P02652	0.223574	0.0133618	2.08924e-62	2.96045e-59	-0.2631	0.0132669	1.15459e-86	1.63605e-83	-0.0319134	0.00681701	2.86807e-06	0.00406406	0.119814	0.00678823	2.01823e-69	2.85983e-66	-0.192984	0.00662126	1.45533e-184	2.0622e-181	-0.0345542	0.00504283	7.39379e-12	1.0477e-08
APOA4;Apolipoprotein A-IV	APOA4	P06727	-0.0496317	0.0139762	0.000384437	0.544748	0.054374	0.0138769	8.94759e-05	0.126787	-0.0026706	0.00713045	0.708011	1	-0.003154	0.00703545	0.653938	1	0.0345111	0.0068624	4.95412e-07	0.000701999	0.121054	0.00522648	8.42441e-118	1.19374e-114
APOBR;Apolipoprotein B receptor	APOBR	Q0VD83	0.122237	0.014193	7.6866e-18	1.08919e-14	-0.131165	0.0140922	1.44294e-20	2.04465e-17	-0.00427896	0.00724107	0.554575	1	0.0576918	0.00721013	1.26653e-15	1.79468e-12	-0.0593192	0.00703278	3.44599e-17	4.88297e-14	0.0123616	0.00535624	0.0210113	1
APOC1;Apolipoprotein C-I	APOC1	P02654	0.239802	0.0131133	4.41056e-74	6.24977e-71	-0.00538952	0.0130201	0.678924	1	0.00462879	0.00669021	0.489024	1	0.247108	0.00651566	0	2.27473e-305	0.0500221	0.00635539	3.62356e-15	5.13459e-12	0.0916453	0.00484034	1.49701e-79	2.12127e-76
APOD;Apolipoprotein D	APOD	P05090	0.277557	0.0134891	4.40074e-93	6.23585e-90	-0.285619	0.0133932	9.18391e-100	1.30136e-96	-0.0132065	0.00688194	0.0549983	1	0.142946	0.00679895	1.54941e-97	2.19551e-94	-0.140828	0.00663172	1.88764e-99	2.67479e-96	0.133412	0.00505079	2.87604e-152	4.07536e-149
APOE;Apolipoprotein E	APOE	P02649	-0.164467	0.0140904	2.2492e-31	3.18712e-28	0.237982	0.0139903	2.01547e-64	2.85592e-61	0.0246561	0.00718875	0.000605243	0.85763	-0.0656433	0.00695366	3.94409e-21	5.58877e-18	0.171657	0.00678262	4.61943e-140	6.54574e-137	0.225944	0.00516572	0	0
APOF;Apolipoprotein F	APOF	Q13790	0.420123	0.0109494	1.584013981432e-310	2.24455e-307	-0.348816	0.0108716	3.95364e-220	5.6023e-217	0.0292757	0.00558622	1.61643e-07	0.000229049	0.230925	0.00556589	0	0	-0.147055	0.00542898	6.10271e-160	8.64754e-157	0.054526	0.00413478	1.29139e-39	1.8299e-36
APOH;Beta-2-glycoprotein 1	APOH	P02749	0.0412251	0.014179	0.0036477	1	-0.0350217	0.0140783	0.0128678	1	-0.0466218	0.00723393	1.18416e-10	1.67796e-07	0.0469095	0.00718543	6.73678e-11	9.54601e-08	-0.0614234	0.00700869	1.96872e-18	2.78967e-15	-0.066884	0.0053379	6.10207e-36	8.64663e-33
APOL1;Apolipoprotein L1	APOL1	O14791	0.0523107	0.0135307	0.000110961	0.157232	0.0556023	0.0134346	3.50701e-05	0.0496943	0.0248037	0.00690319	0.000327613	0.464228	0.0990874	0.00683293	1.62566e-47	2.30356e-44	0.0451306	0.00666486	1.29515e-11	1.83523e-08	0.0198	0.00507603	9.60977e-05	0.13617
APOM;Apolipoprotein M	APOM	O95445	0.485232	0.0128744	4.53554e-300	6.42686e-297	-0.196837	0.0127829	3.465e-53	4.90991e-50	0.0284766	0.00656834	1.46205e-05	0.0207173	0.397662	0.00644071	0	0	-0.0279325	0.00628229	8.76569e-06	0.012421	-0.00214156	0.00478466	0.654454	1
APP;Amyloid-beta precursor protein	APP	P05067	-0.108644	0.0141255	1.52584e-14	2.16212e-11	0.194908	0.0140252	1.07049e-43	1.51688e-40	0.0124859	0.00720666	0.0831927	1	-0.0054293	0.00716336	0.4485	1	0.13194	0.00698717	3.85997e-79	5.46958e-76	0.00148379	0.0053215	0.780377	1
APPL2;DCC-interacting protein 13-beta	APPL2	Q8NEU8	0.00806463	0.014157	0.568918	1	0.134891	0.0140565	9.25906e-22	1.31201e-18	0.00375456	0.00722274	0.603192	1	0.062185	0.00720292	6.20601e-18	8.79392e-15	0.081082	0.00702575	9.3431e-31	1.32392e-27	0.0059749	0.00535089	0.264165	1
APRT;Adenine phosphoribosyltransferase	APRT	P07741	-0.061175	0.0141745	1.59776e-05	0.0226402	0.113374	0.0140738	8.35697e-16	1.18418e-12	-0.00451045	0.00723163	0.532825	1	-0.00948263	0.00719807	0.187718	1	0.0687348	0.00702102	1.33005e-22	1.88469e-19	-0.00108326	0.00534729	0.839464	1
ARAF;Serine/threonine-protein kinase A-Raf	ARAF	P10398	-0.052415	0.0142608	0.000238065	0.337338	0.135197	0.0141595	1.47344e-21	2.08787e-18	0.00587112	0.00727568	0.419705	1	-0.000888525	0.00724275	0.902363	1	0.0872971	0.0070646	5.27862e-35	7.4798e-32	0.0140305	0.00538048	0.00912013	1
AREG;Amphiregulin	AREG	P15514	-0.2749	0.0139978	4.83326e-85	6.84873e-82	0.193014	0.0138984	1.22119e-43	1.73043e-40	-0.00566233	0.0071415	0.427859	1	-0.156268	0.00713908	1.66914e-105	2.36517e-102	0.0684465	0.00696348	9.00289e-23	1.27571e-19	-0.00728861	0.00530347	0.169354	1
ARF6;ADP-ribosylation factor 6	ARF6	P62330	-0.151965	0.0139826	1.96125e-27	2.77909e-24	0.305555	0.0138833	4.703e-106	6.66415e-103	0.0313796	0.00713373	1.09447e-05	0.0155087	-0.0103931	0.00709786	0.143132	1	0.202706	0.00692327	3.28955e-186	4.6613e-183	0.0311561	0.00527284	3.47809e-09	4.92845e-06
ARFIP1;Arfaptin-1	ARFIP1	P53367	-0.0094254	0.0142306	0.507766	1	0.109909	0.0141296	7.69424e-15	1.09027e-11	0.00553145	0.00726028	0.446142	1	0.0297942	0.0072278	3.76181e-05	0.0533049	0.083597	0.00705002	2.26195e-32	3.20518e-29	0.01061	0.00536937	0.0481598	1
ARG1;Arginase-1	ARG1	P05089	-0.0527173	0.0142756	0.000222395	0.315133	0.0567541	0.0141742	6.25053e-05	0.08857	-0.000765521	0.00728325	0.916292	1	-0.0104777	0.0072401	0.147855	1	0.0623672	0.00706201	1.08076e-18	1.53144e-15	-0.0043702	0.00537851	0.416493	1
ARG2;Arginase-2, mitochondrial	ARG2	P78540	-0.00161997	0.0142853	0.909713	1	-0.000182913	0.0141838	0.989711	1	-0.00148571	0.00728816	0.83847	1	-0.0210176	0.00725202	0.00375573	1	0.0193022	0.00707364	0.00636064	1	0.00801313	0.00538737	0.13692	1
ARHGAP1;Rho GTPase-activating protein 1	ARHGAP1	Q07960	-0.0492506	0.014207	0.000528118	0.748344	0.123375	0.0141061	2.38302e-18	3.37673e-15	-0.0103306	0.00724821	0.154096	1	0.0140706	0.00720922	0.0509751	1	0.0756813	0.0070319	5.69458e-27	8.06922e-24	-0.0141821	0.00535557	0.0080982	1
ARHGAP25;Rho GTPase-activating protein 25	ARHGAP25	P42331	-0.0832008	0.0141464	4.13507e-09	5.8594e-06	0.17365	0.014046	5.61388e-35	7.95487e-32	-0.00069134	0.00721733	0.923689	1	0.00860573	0.00719766	0.231849	1	0.0956024	0.00702062	4.03599e-42	5.719e-39	-0.00193291	0.00534698	0.717731	1
ARHGAP30;Rho GTPase-activating protein 30	ARHGAP30	Q7Z6I6	-0.0335096	0.0142834	0.0189833	1	0.0349917	0.0141819	0.0136204	1	-0.00710745	0.00728719	0.329406	1	-0.017293	0.00725604	0.0171654	1	0.00923011	0.00707756	0.192196	1	-0.00294634	0.00539035	0.58466	1
ARHGAP45;Rho GTPase-activating protein 45	ARHGAP45	Q92619	-0.0236464	0.0141109	0.0938013	1	0.172588	0.0140106	9.73202e-35	1.37903e-31	0.0028995	0.00719918	0.687134	1	0.0531391	0.00718403	1.42556e-13	2.02002e-10	0.0981049	0.00700732	2.04049e-44	2.89138e-41	0.00404657	0.00533686	0.448317	1
ARHGAP5;Rho GTPase-activating protein 5	ARHGAP5	Q13017	-0.0680105	0.0142951	1.97326e-06	0.00279611	0.0850015	0.0141936	2.15238e-09	3.04992e-06	0.00464501	0.0072932	0.5242	1	-0.0171516	0.00726456	0.018231	1	0.0354005	0.00708587	5.8831e-07	0.000833636	-0.00621442	0.00539668	0.249523	1
ARHGEF1;Rho guanine nucleotide exchange factor 1	ARHGEF1	Q92888	-0.104671	0.0140321	9.05725e-14	1.28341e-10	0.244225	0.0139325	2.88465e-68	4.08755e-65	0.0250833	0.00715902	0.000459817	0.651561	-0.000299658	0.00712296	0.966444	1	0.165389	0.00694776	2.86413e-124	4.05847e-121	0.0345481	0.00529149	6.71145e-11	9.51013e-08
ARHGEF10;Rho guanine nucleotide exchange factor 10	ARHGEF10	O15013	-0.0637515	0.0141624	6.7877e-06	0.00961817	0.169212	0.0140618	3.11208e-33	4.40982e-30	0.0115604	0.00722546	0.109625	1	0.00978297	0.00720005	0.174239	1	0.101791	0.00702295	1.81035e-47	2.56526e-44	0.013857	0.00534876	0.00958216	1
ARHGEF12;Rho guanine nucleotide exchange factor 12	ARHGEF12	Q9NZN5	-0.0730905	0.0140919	2.1618e-07	0.000306328	0.217302	0.0139918	4.55247e-54	6.45085e-51	0.0199253	0.00718948	0.00558614	1	0.0169485	0.00717244	0.0181333	1	0.136597	0.00699602	1.88255e-84	2.66758e-81	0.0225326	0.00532825	2.35438e-05	0.0333615
ARHGEF5;Rho guanine nucleotide exchange factor 5	ARHGEF5	Q12774	-0.0174162	0.0142906	0.222967	1	0.018037	0.0141891	0.203678	1	0.00128753	0.00729087	0.859829	1	-0.0203316	0.00725444	0.00507125	1	0.015472	0.007076	0.0287823	1	0.00358236	0.00538916	0.506225	1
ARID3A;AT-rich interactive domain-containing protein 3A	ARID3A	Q99856	-0.00503661	0.014314	0.724942	1	0.00450219	0.0142123	0.751413	1	-0.00481042	0.00730281	0.510091	1	0.00422582	0.00726844	0.56098	1	-0.00520419	0.00708966	0.462921	1	-0.00444231	0.00539956	0.410675	1
ARID4B;AT-rich interactive domain-containing protein 4B	ARID4B	Q4LE39	-0.0678002	0.0142879	2.09714e-06	0.00297164	0.0893069	0.0141865	3.13554e-10	4.44306e-07	0.00394309	0.00728953	0.588565	1	-0.0144185	0.00725153	0.0467821	1	0.0596893	0.00707316	3.32563e-17	4.71241e-14	0.00737624	0.005387	0.170925	1
ARL13B;ADP-ribosylation factor-like protein 13B	ARL13B	Q3SXY8	-0.0606928	0.0142008	1.92995e-05	0.0273475	0.160001	0.0140999	9.46017e-30	1.34051e-26	0.0122798	0.00724506	0.0901074	1	0.0020252	0.00720535	0.778659	1	0.115961	0.00702812	6.25734e-61	8.86665e-58	0.0177041	0.00535269	0.000942232	1
ARL2BP;ADP-ribosylation factor-like protein 2-binding protein	ARL2BP	Q9Y2Y0	-0.00456295	0.0142168	0.748249	1	0.109759	0.0141159	7.88472e-15	1.11727e-11	0.0052938	0.00725324	0.465489	1	0.0399219	0.00722256	3.27333e-08	4.6383e-05	0.0775211	0.0070449	4.06827e-28	5.76474e-25	0.00937827	0.00536548	0.0804916	1
ARMCX2;Armadillo repeat-containing X-linked protein 2	ARMCX2	Q7L311	0.00255379	0.0143008	0.858272	1	-0.00541369	0.0141992	0.70301	1	0.00245154	0.00729609	0.736868	1	0.00635275	0.00726241	0.381719	1	-0.0112269	0.00708377	0.113003	1	-0.00660426	0.00539508	0.220912	1
ARNT;Aryl hydrocarbon receptor nuclear translocator	ARNT	P27540	-0.0399739	0.0142719	0.00510139	1	0.0389059	0.0141705	0.00604658	1	0.002926	0.00728134	0.687799	1	-0.0204601	0.00724816	0.00476324	1	0.0112128	0.00706988	0.11275	1	-0.00633118	0.0053845	0.239676	1
ARNTL;Aryl hydrocarbon receptor nuclear translocator-like protein 1	BMAL1	O00327	0.0417983	0.0143164	0.00350884	1	-0.0305458	0.0142148	0.0316561	1	-0.00815484	0.00730406	0.26423	1	0.0168241	0.0072692	0.0206496	1	-0.0132619	0.0070904	0.0614357	1	0.00145095	0.00540013	0.788171	1
ARSA;Arylsulfatase A	ARSA	P15289	-0.179375	0.0136068	1.63088e-39	2.31095e-36	0.216748	0.0135102	1.49382e-57	2.11674e-54	-0.02453	0.00694201	0.000410954	0.582322	-0.0458034	0.00690004	3.22271e-11	4.56658e-08	0.0978962	0.00673032	8.57584e-48	1.2152e-44	-0.0293202	0.00512589	1.0737e-08	1.52143e-05
ARSB;Arylsulfatase B	ARSB	P15848	-0.113706	0.0138935	2.91159e-16	4.12573e-13	0.215746	0.0137948	8.45804e-55	1.1985e-51	-0.00454202	0.00708828	0.521674	1	-0.000928525	0.00707001	0.895513	1	0.131137	0.00689611	3.16501e-80	4.48482e-77	-0.011948	0.00525215	0.0229193	1
ART3;Ecto-ADP-ribosyltransferase 3	ART3	Q13508	0.0239682	0.0127576	0.0602953	1	-0.0202981	0.012667	0.109075	1	0.00493993	0.00650877	0.447882	1	0.0153695	0.00648006	0.0177066	1	-0.0281051	0.00632067	8.75348e-06	0.0124037	0.00812467	0.0048139	0.0914675	1
ART5;Ecto-ADP-ribosyltransferase 5	ART5	Q96L15	0.0320326	0.014317	0.025273	1	-0.0322253	0.0142153	0.023405	1	-0.0057349	0.00730436	0.432385	1	0.0101087	0.00726937	0.164358	1	-0.0174809	0.00709057	0.0136919	1	0.00537259	0.00540026	0.319803	1
ARTN;Artemin	ARTN	Q5T4W7	-0.0374483	0.0143099	0.00887868	1	0.0619541	0.0142082	1.30475e-05	0.0184882	0.00409039	0.00730072	0.5753	1	0.000406879	0.00726744	0.955353	1	0.0231909	0.00708868	0.00107066	1	0.00520291	0.00539882	0.335197	1
ASAH1;Acid ceramidase	ASAH1	Q13510	-0.124848	0.0139415	3.69409e-19	5.23453e-16	0.18974	0.0138425	1.45507e-42	2.06183e-39	0.00207585	0.00711278	0.770407	1	-0.0314569	0.00710151	9.4685e-06	0.0134169	0.121074	0.00692683	4.01281e-68	5.68615e-65	0.00130098	0.00527555	0.805215	1
ASAH2;Neutral ceramidase	ASAH2	Q9NR71	-0.106245	0.0135406	4.50305e-15	6.38082e-12	0.225884	0.0134445	6.66048e-63	9.4379e-60	-0.0114178	0.00690826	0.0983936	1	0.0197657	0.00689609	0.00415659	1	0.103789	0.00672646	1.5396e-53	2.18161e-50	-0.021475	0.00512295	2.77271e-05	0.0392893
ASGR1;Asialoglycoprotein receptor 1	ASGR1	P07306	-0.318778	0.0123316	6.82403e-145	9.66965e-142	0.44363	0.0122441	3.37196e-278	4.77806e-275	0.0177258	0.00629144	0.00484556	1	-0.0608181	0.00638421	1.72931e-21	2.45043e-18	0.199163	0.00622717	2.77485e-221	3.93196e-218	-0.00801541	0.00474268	0.0910259	1
ASGR2;Asialoglycoprotein receptor 2	ASGR2	P07307	-0.0482446	0.0137797	0.000464315	0.657935	0.136055	0.0136818	3.0374e-23	4.30399e-20	0.0274939	0.00703022	9.22995e-05	0.130788	0.0485809	0.00701696	4.48603e-12	6.35671e-09	0.041071	0.00684437	1.98379e-09	2.81103e-06	0.0130368	0.00521275	0.012391	1
ASPN;Asporin	ASPN	Q9BXN1	0.202309	0.0136777	3.10119e-49	4.39439e-46	-0.0934219	0.0135806	6.20729e-12	8.79574e-09	-0.0748297	0.00697819	9.39852e-27	1.33177e-23	0.172495	0.00693413	1.99164e-135	2.82215e-132	-0.0584515	0.00676357	5.74695e-18	8.14342e-15	-0.0897486	0.00515122	1.06548e-67	1.50978e-64
ASPSCR1;Tether containing UBX domain for GLUT4	ASPSCR1	Q9BZE9	-0.0848704	0.0140742	1.66718e-09	2.36239e-06	0.197396	0.0139743	4.41634e-45	6.25796e-42	0.0138516	0.00718048	0.0537373	1	0.0125357	0.00714612	0.0794058	1	0.12103	0.00697035	2.96836e-67	4.20617e-64	0.00561795	0.0053087	0.289947	1
ASRGL1;Isoaspartyl peptidase/L-asparaginase	ASRGL1	Q7L266	-0.0214826	0.0142017	0.130379	1	0.132129	0.0141009	8.00475e-21	1.13427e-17	0.00103375	0.00724554	0.886549	1	0.0399139	0.00721593	3.19999e-08	4.53439e-05	0.0823806	0.00703844	1.38477e-31	1.96222e-28	0.0032854	0.00536055	0.539956	1
ASS1;Argininosuccinate synthase	ASS1	P00966	-0.0252483	0.0134038	0.0596252	1	0.130433	0.0133086	1.26284e-22	1.78944e-19	-0.0203314	0.00683846	0.00295174	1	0.0492711	0.00681409	4.89983e-13	6.94305e-10	0.0689995	0.00664648	3.27766e-25	4.64444e-22	-0.0405278	0.00506203	1.21883e-15	1.72708e-12
ATF2;Cyclic AMP-dependent transcription factor ATF-2	ATF2	P15336	-0.031551	0.0143041	0.0274147	1	0.0410605	0.0142025	0.00384352	1	0.0040273	0.00729777	0.581055	1	-0.00307981	0.00726502	0.671625	1	0.0173309	0.00708633	0.0144628	1	0.0067748	0.00539703	0.209384	1
ATF4;Cyclic AMP-dependent transcription factor ATF-4	ATF4	P18848	0.00969855	0.0143256	0.498408	1	-0.00761726	0.0142238	0.592291	1	0.0038901	0.00730872	0.594556	1	0.00167193	0.00727204	0.818161	1	0.0070788	0.00709317	0.318299	1	0.0148908	0.00540224	0.00584706	1
ATG16L1;Autophagy-related protein 16-1	ATG16L1	Q676U5	-0.105048	0.0140213	7.07288e-14	1.00223e-10	0.255292	0.0139218	1.76702e-74	2.50386e-71	0.0238239	0.00715351	0.000868895	1	0.0152117	0.00713021	0.0328976	1	0.159666	0.00695483	8.7715e-116	1.24292e-112	0.0281451	0.00529688	1.08171e-07	0.000153278
ATG4A;Cysteine protease ATG4A	ATG4A	Q8WYN0	-0.13084	0.0141353	2.3325e-20	3.30516e-17	0.178492	0.0140349	6.62308e-37	9.3849e-34	-0.00414404	0.00721166	0.565548	1	-0.0197602	0.00715774	0.00577129	1	0.130211	0.00698168	2.95666e-77	4.18959e-74	-0.00257529	0.00531733	0.628162	1
ATOX1;Copper transport protein ATOX1	ATOX1	O00244	-0.029573	0.0140529	0.0353563	1	0.148866	0.0139531	1.68413e-26	2.38642e-23	0.00851976	0.00716963	0.234725	1	0.0357535	0.00715511	5.85316e-07	0.000829392	0.0821787	0.00697911	6.032e-32	8.54735e-29	0.00443935	0.00531537	0.403616	1
ATP1B1;Sodium/potassium-transporting ATPase subunit beta-1	ATP1B1	P05026	-0.0152863	0.014308	0.285363	1	0.0176153	0.0142063	0.215004	1	0.00216959	0.00729973	0.766306	1	-0.0116635	0.00726494	0.108403	1	0.00507422	0.00708624	0.473955	1	0.00805809	0.00539696	0.135425	1
ATP1B2;Sodium/potassium-transporting ATPase subunit beta-2	ATP1B2	P14415	0.0448773	0.0143028	0.00170565	1	-0.0592186	0.0142013	3.05988e-05	0.0433584	-0.00505519	0.00729713	0.488466	1	0.00219224	0.00726264	0.762767	1	-0.0284463	0.007084	5.94266e-05	0.0842075	0.000819059	0.00539525	0.879337	1
ATP1B3;Sodium/potassium-transporting ATPase subunit beta-3	ATP1B3	P54709	0.00335627	0.0143172	0.81466	1	-0.0220005	0.0142155	0.121726	1	0.0156658	0.00730446	0.0319897	1	0.00684584	0.00726781	0.346229	1	-0.0289233	0.00708904	4.51345e-05	0.0639555	0.00362783	0.00539909	0.501631	1
ATP1B4;Protein ATP1B4	ATP1B4	Q9UN42	-0.00196275	0.0143151	0.890945	1	-0.0123159	0.0142135	0.38623	1	0.0144212	0.0073034	0.0483296	1	-0.00858585	0.00726883	0.237536	1	0.000427692	0.00709004	0.951899	1	0.00424117	0.00539985	0.432211	1
ATP2B4;Plasma membrane calcium-transporting ATPase 4	ATP2B4	P23634	-0.00147937	0.0142892	0.917543	1	-0.00504891	0.0141877	0.721945	1	-2.08954e-05	0.00729016	0.997713	1	-0.00541074	0.00725747	0.455949	1	-0.0101586	0.00707895	0.151285	1	-0.00135339	0.00539141	0.801795	1
ATP5F1D;ATP synthase subunit delta, mitochondrial	ATP5F1D	P30049	0.00951022	0.0143198	0.506614	1	-0.00684125	0.0142181	0.630405	1	-0.00173857	0.00730578	0.811905	1	-0.00014072	0.0072714	0.98456	1	0.00860342	0.00709254	0.225129	1	0.00410823	0.00540176	0.446939	1
ATP5IF1;ATPase inhibitor, mitochondrial	ATP5IF1	Q9UII2	-0.0464075	0.0141168	0.00101302	1	0.174635	0.0140166	1.70493e-35	2.41588e-32	0.0185097	0.00720222	0.0101772	1	0.0281704	0.00716431	8.43859e-05	0.119575	0.127813	0.00698809	2.19372e-74	3.1085e-71	0.0242513	0.00532221	5.21575e-06	0.00739072
ATP5PO;ATP synthase subunit O, mitochondrial	ATP5PO	P48047	-0.012179	0.0143211	0.395097	1	0.0236081	0.0142193	0.0968747	1	-0.00878449	0.00730642	0.229263	1	-0.00225237	0.00727168	0.756757	1	0.0120376	0.00709282	0.0896774	1	8.63874e-05	0.00540197	0.987241	1
ATP6AP2;Renin receptor	ATP6AP2	O75787	-0.134207	0.0140646	1.55927e-21	2.20948e-18	0.226878	0.0139647	5.79508e-59	8.21162e-56	0.0394433	0.00717557	3.91418e-08	5.54639e-05	-0.0165259	0.00715984	0.0209975	1	0.123142	0.00698373	2.74252e-69	3.88615e-66	0.0301791	0.00531888	1.40639e-08	1.99285e-05
ATP6V1D;V-type proton ATPase subunit D	ATP6V1D	Q9Y5K8	0.00546757	0.0143161	0.702526	1	0.0200404	0.0142144	0.158594	1	0.00485884	0.00730387	0.505903	1	0.0141397	0.00726899	0.0517572	1	0.014644	0.0070902	0.0388939	1	-0.00212591	0.00539997	0.693813	1
ATP6V1F;V-type proton ATPase subunit F	ATP6V1F	Q16864	-0.0586476	0.0142451	3.85373e-05	0.0546073	0.113525	0.014144	1.06027e-15	1.5024e-12	-0.0046832	0.00726768	0.519332	1	0.00466393	0.00722969	0.518861	1	0.0706346	0.00705186	1.3878e-23	1.96652e-20	0.00796865	0.00537078	0.137896	1
ATP6V1G1;V-type proton ATPase subunit G 1	ATP6V1G1	O75348	-0.141572	0.014029	6.90937e-24	9.79058e-21	0.283663	0.0139294	3.11928e-91	4.42002e-88	0.0118056	0.00715744	0.099079	1	-0.00564458	0.00714726	0.429677	1	0.16288	0.00697146	8.13764e-120	1.1531e-116	0.0114388	0.00530954	0.0312163	1
ATP6V1G2;V-type proton ATPase subunit G 2	ATP6V1G2	O95670	-0.0547102	0.0142953	0.000130037	0.184262	0.0901572	0.0141937	2.1739e-10	3.08041e-07	0.00400726	0.00729325	0.582705	1	-0.00234822	0.00726244	0.746441	1	0.0429904	0.0070838	1.3016e-09	1.84437e-06	0.00780464	0.0053951	0.148014	1
ATRAID;All-trans retinoic acid-induced differentiation factor	ATRAID	Q6UW56	-0.13492	0.0138442	2.16813e-22	3.07224e-19	0.124892	0.0137458	1.1263e-19	1.59597e-16	0.012063	0.00706312	0.0876728	1	-0.0629857	0.00705715	4.66336e-19	6.60799e-16	0.0394805	0.00688357	9.80376e-09	1.38919e-05	0.0290042	0.0052426	3.18111e-08	4.50764e-05
ATRN;Attractin, Isoform 2	ATRN	O75882-2	0.00953214	0.0133529	0.475321	1	0.216978	0.0132581	8.45625e-60	1.19825e-56	0.00256931	0.00681248	0.706068	1	0.12238	0.00675597	5.26312e-73	7.45784e-70	0.141333	0.00658979	2.15916e-101	3.05953e-98	0.0113886	0.00501886	0.0232639	1
ATXN10;Ataxin-10	ATXN10	Q9UBB4	-0.0351271	0.0142988	0.0140329	1	0.0654457	0.0141973	4.05753e-06	0.00574951	0.00854743	0.00729508	0.241343	1	-0.0179567	0.00726291	0.0134264	1	0.039076	0.00708426	3.49446e-08	4.95165e-05	0.0107227	0.00539545	0.0468908	1
ATXN2;Ataxin-2	ATXN2	Q99700	-0.0334822	0.0142638	0.0189173	1	0.0781739	0.0141625	3.43767e-08	4.87118e-05	0.0150221	0.0072772	0.0390058	1	-0.0125056	0.00724278	0.0842432	1	0.0583293	0.00706463	1.55129e-16	2.19817e-13	0.0165625	0.0053805	0.00208381	1
ATXN2L;Ataxin-2-like protein	ATXN2L	Q8WWM7	-0.0783558	0.0141593	3.17266e-08	4.49566e-05	0.187917	0.0140587	1.43298e-40	2.03053e-37	0.0107937	0.00722387	0.135146	1	0.00298812	0.00719468	0.677908	1	0.123519	0.00701771	4.77747e-69	6.76968e-66	0.0118053	0.00534477	0.0271974	1
ATXN3;Ataxin-3	ATXN3	P54252	-0.140307	0.0140664	2.24062e-23	3.17496e-20	0.214996	0.0139665	3.72278e-53	5.27518e-50	0.0129067	0.00717648	0.0721168	1	-0.0157736	0.00711778	0.0266923	1	0.156221	0.0069427	2.44605e-111	3.46605e-108	0.0173408	0.00528764	0.0010409	1
AXIN1;Axin-1	AXIN1	O15169	-0.0848972	0.0140512	1.55008e-09	2.19646e-06	0.234207	0.0139514	8.38916e-63	1.18874e-59	0.0102507	0.00716874	0.152759	1	0.0174753	0.00715233	0.0145586	1	0.140815	0.0069764	4.33491e-90	6.14256e-87	0.0137967	0.00531331	0.0094181	1
[truncated: 2,698 more rows]

## Sheet: S5
Supplementary Table 5. Mendelian randomization analysis for associations between proteins selected in UK Biobank analysis with low-density lipoprotein, triglyceride-rich lipoproteins, and lipoprotein(a) concentrations.
[truncated: 3,299 more rows]

[truncated: 9 more sheets: S6, S7, S8, S9, S10, S11, S12, S13, S14]
